# Supplementary material
Source: PubMed Central journal article supplement (PMC3563429)
Supplement: NIHMS433010-supplement-1_si_001.pdf [file NIHMS433010-supplement-1_si_001.pdf]

## Supporting Information

### **Biosynthetic Multitasking Facilitates Thalassospiramide Structural Diversity in Marine Bacteria**

Avena C. Ross,<sup>†,#</sup> Ying Xu,<sup>‡,#</sup> Liang Lu,<sup>‡</sup> Roland D. Kersten,<sup>†</sup> Zongze Shao,<sup>§</sup>  
Abdulaziz M. Al-Suwailem,<sup>ψ</sup> Pieter C. Dorrestein<sup>†,⊥</sup> Pei-Yuan Qian<sup>\*,‡</sup> and Bradley S.  
Moore<sup>\*,†,⊥</sup>

<sup>†</sup>Center for Marine Biotechnology and Biomedicine, Scripps Institution of Oceanography, University of California at San Diego, La Jolla, California 92037, United States

<sup>‡</sup>KAUST Global Collaborative Research, Division of Life Science, School of Science, Hong Kong University of Science and Technology, Clear Water Bay, Hong Kong, China

<sup>§</sup>The Third Institute of Oceanography, China Ocean Administration, Xiemen, China

<sup>ψ</sup>The Coastal and Marine Resources Core Lab, Red Sea Research Center, 4700 King Abdullah University of Science and Technology, Thuwal, Makkah 23955-6900, Kingdom of Saudi Arabia

<sup>⊥</sup>Skaggs School of Pharmacy and Pharmaceutical Sciences, University of California at San Diego, La Jolla, California 92093, United States

## Table of Contents

|            |                                                                                                                    |     |
|------------|--------------------------------------------------------------------------------------------------------------------|-----|
| Figure S1  | Characterization of thalassospiramide A (1)                                                                        | S3  |
| Figure S2  | Characterization of thalassospiramide A1 (3)                                                                       | S5  |
| Figure S3  | Characterization of thalassospiramide A2 (4)                                                                       | S13 |
| Figure S4  | Characterization of thalassospiramide A3 (5)                                                                       | S14 |
| Figure S5  | Characterization of thalassospiramide A4 (6)                                                                       | S15 |
| Figure S6  | Characterization of thalassospiramide A5 (11)                                                                      | S23 |
| Figure S7  | Characterization of thalassospiramide B (2)                                                                        | S32 |
| Figure S8  | Characterization of thalassospiramide B1 (12)                                                                      | S34 |
| Figure S9  | Characterization of thalassospiramide C (7)                                                                        | S35 |
| Figure S10 | Characterization of thalassospiramide C1 (8)                                                                       | S44 |
| Figure S11 | Characterization of thalassospiramide D (14)                                                                       | S45 |
| Figure S12 | Characterization of thalassospiramide D1 (15)                                                                      | S53 |
| Figure S13 | Characterization of thalassospiramide E (9)                                                                        | S54 |
| Figure S14 | Characterization of thalassospiramide E1 (10)                                                                      | S61 |
| Figure S15 | Characterization of thalassospiramide F (16)                                                                       | S62 |
| Table S1   | Stereochemical characterization of amino acid residues                                                             | S71 |
| Figure S16 | Active site mapping and substrate identification of the TtcA CAT tridomain of the <i>Thalassospira</i> sp. CNJ-328 | S73 |
| Figure S17 | Substrate screening of the TtcA CAT tridomain of the <i>Thalassospira</i> sp. CNJ-328 thalassospiramide pathway    | S74 |
| Figure S18 | Alignment of adenylation domain protein sequences to those from surfactin and gramicidin crystal structures        | S75 |
| Figure S19 | Graphical representation of adenylation domain protein alignment                                                   | S76 |

# A ESI-TOF-HRMS

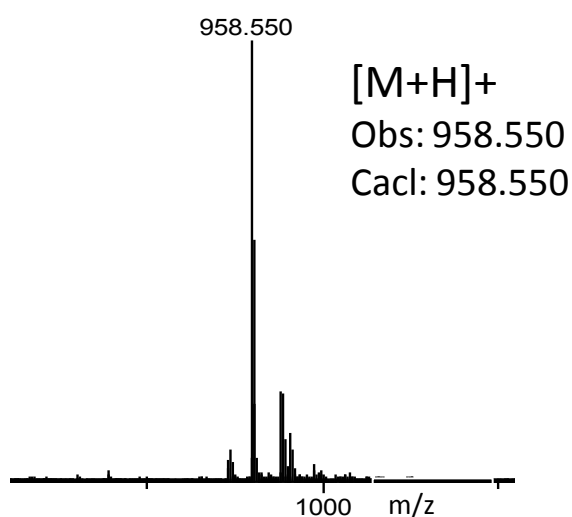

## ITMS<sup>2</sup> – 958 m/z (1+)

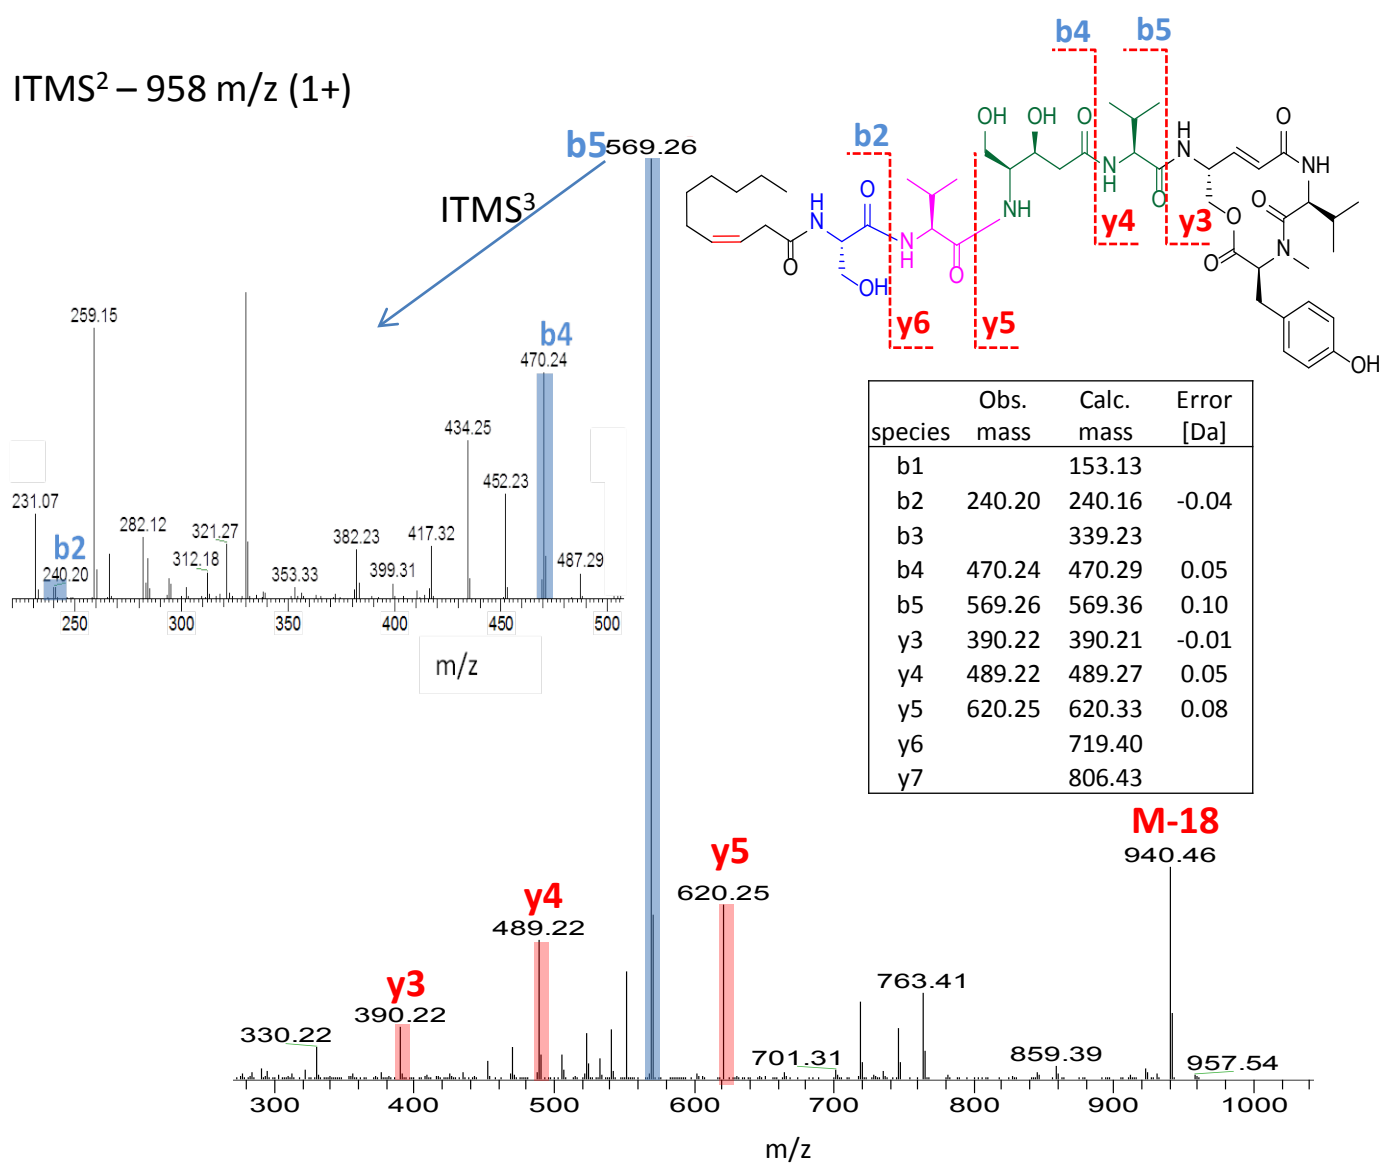

Figure S1. Characterization of thalassospiramide A (1). (A) MS<sup>n</sup> analysis.

**B**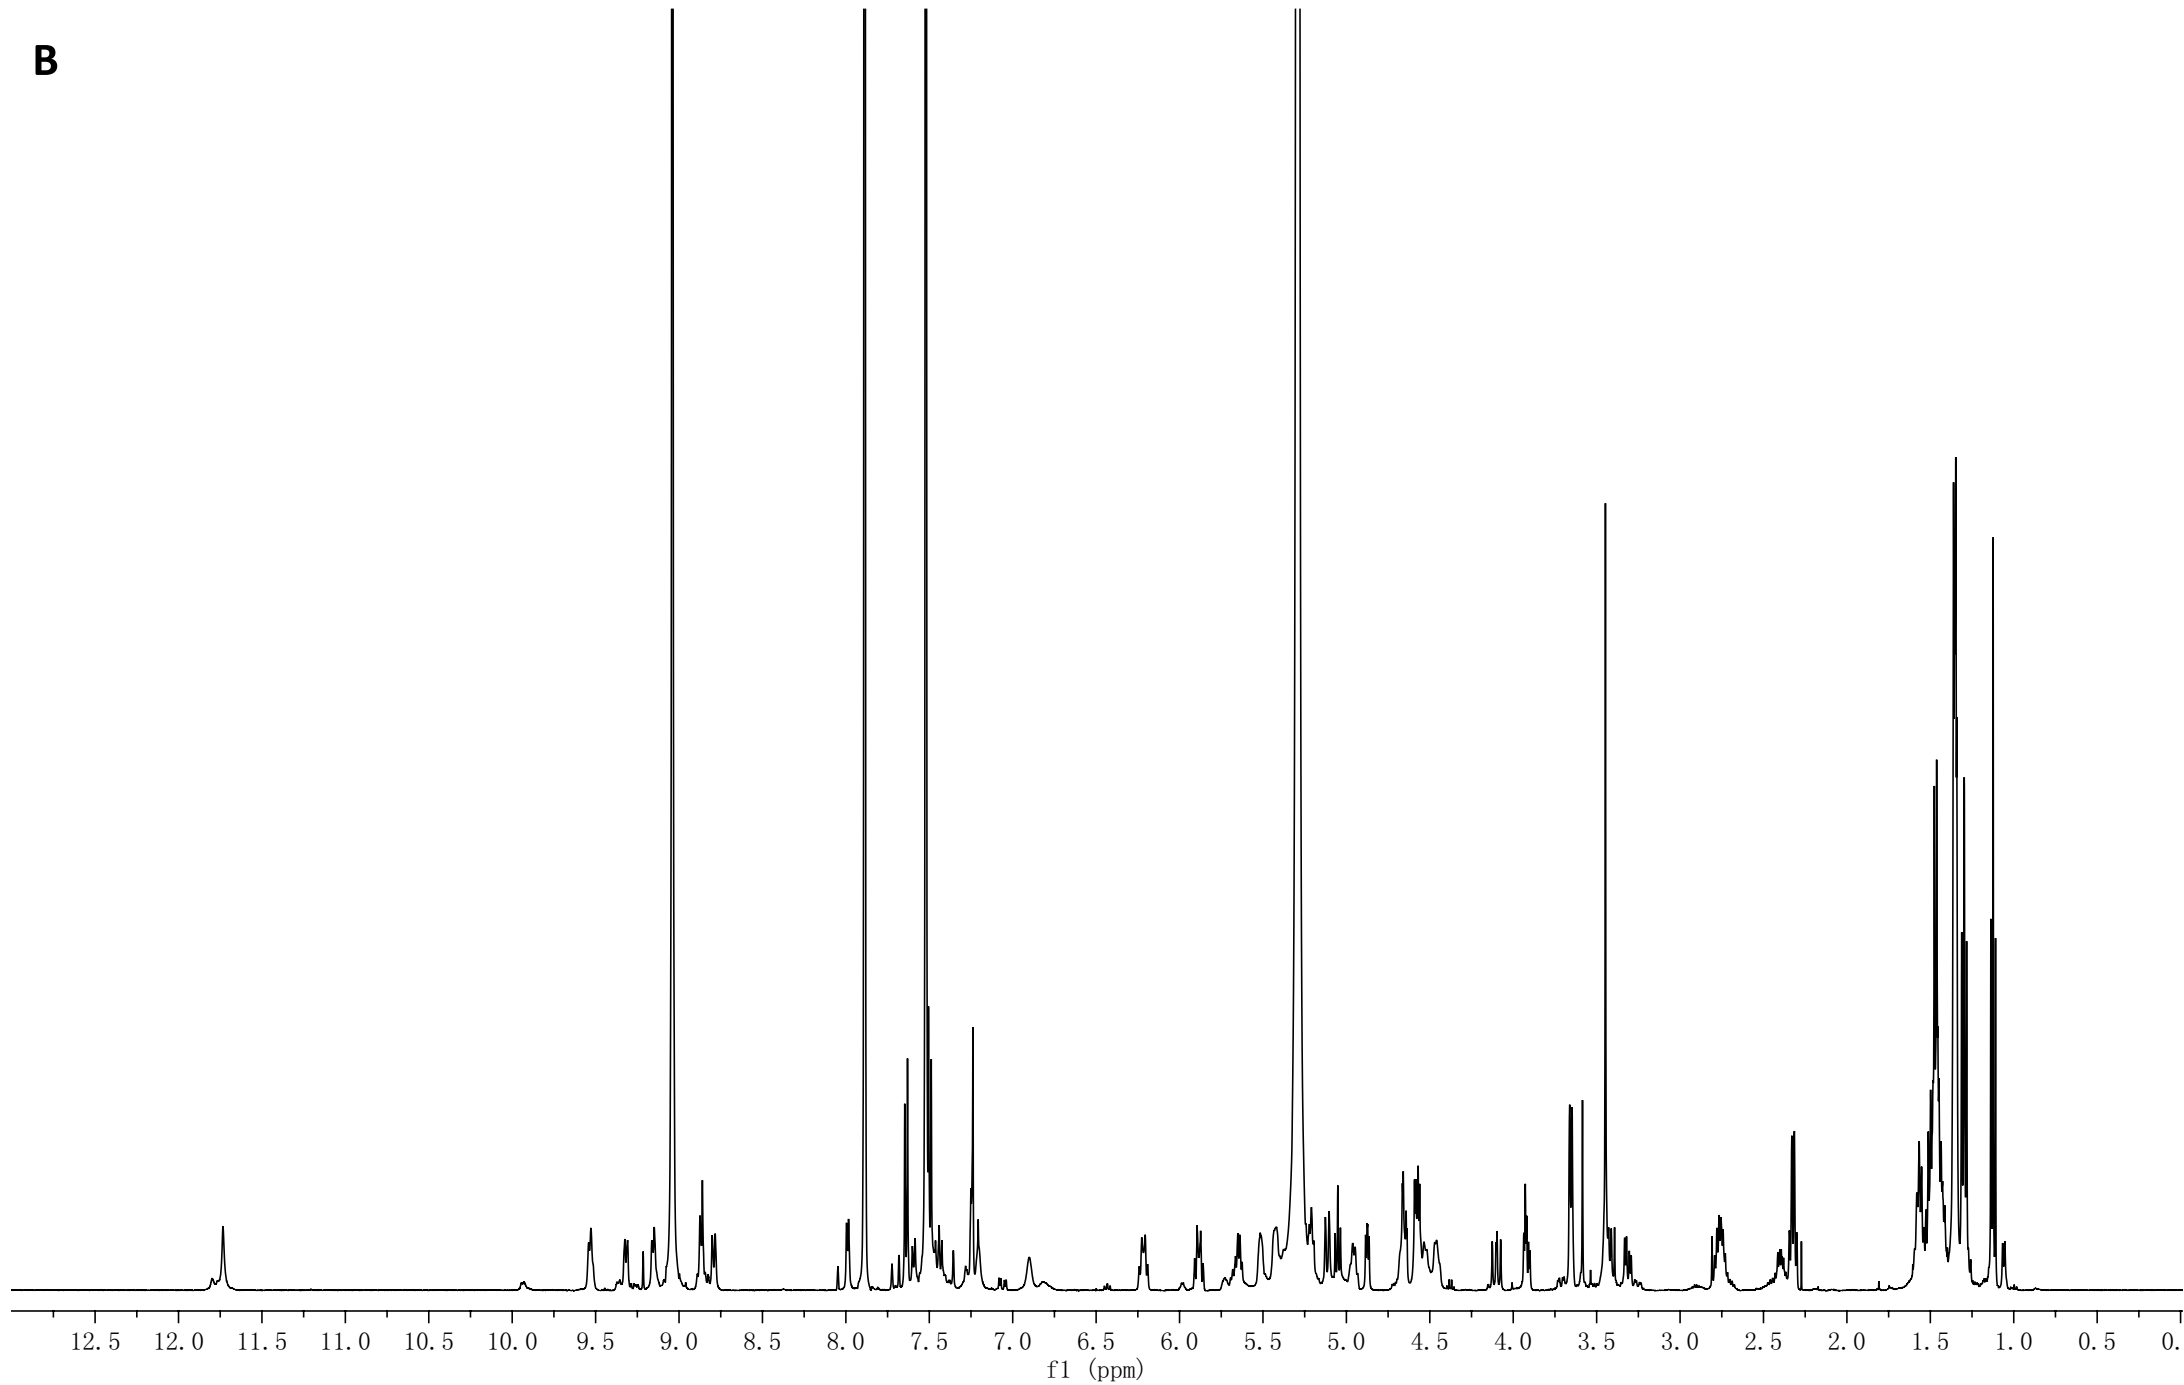

**Figure S1. Characterization of thalassospiramide A (1). (B)  $^1\text{H}$  spectrum in  $\text{pyridine-}d_5$ .**

# A ESI-TOF-HRMS

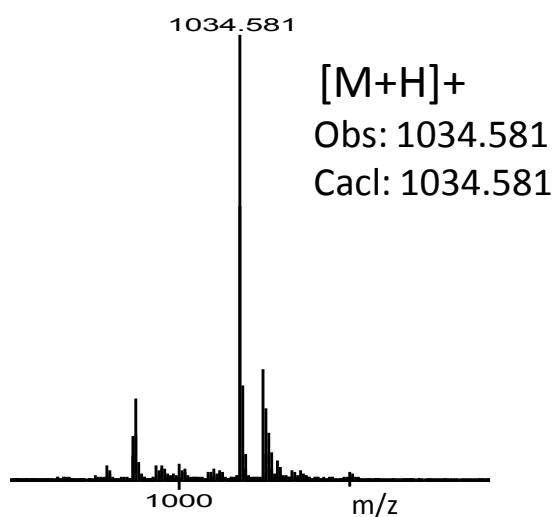

## ITMS<sup>2</sup> – 1034 m/z (1+)

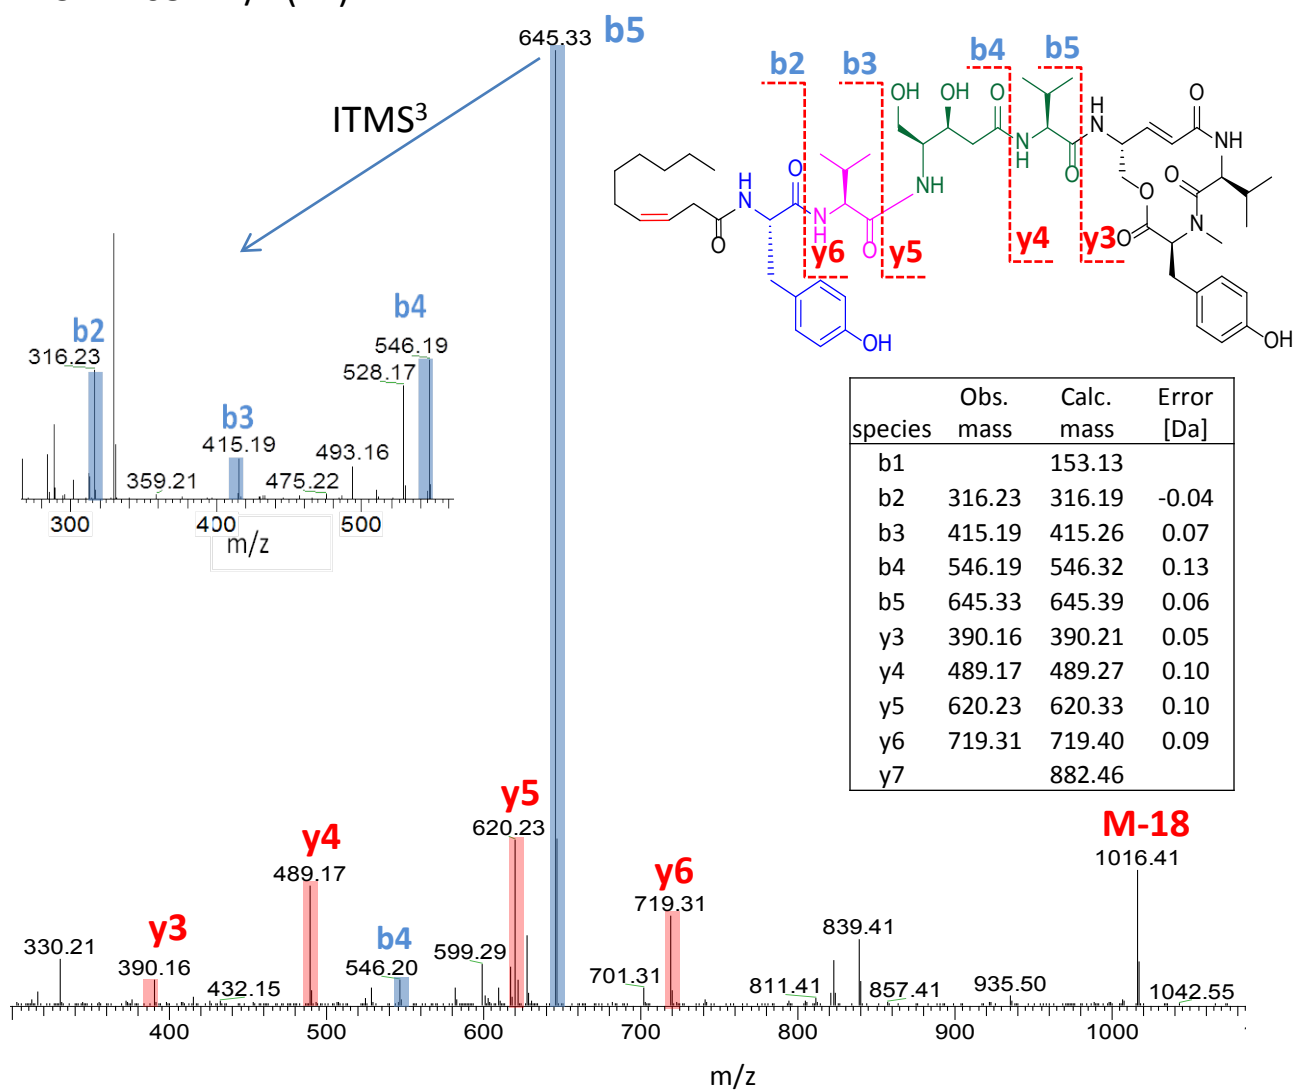

Figure S2. Characterization of thalassospiramide A1 (3). (A) MS<sup>n</sup> analysis.

**B**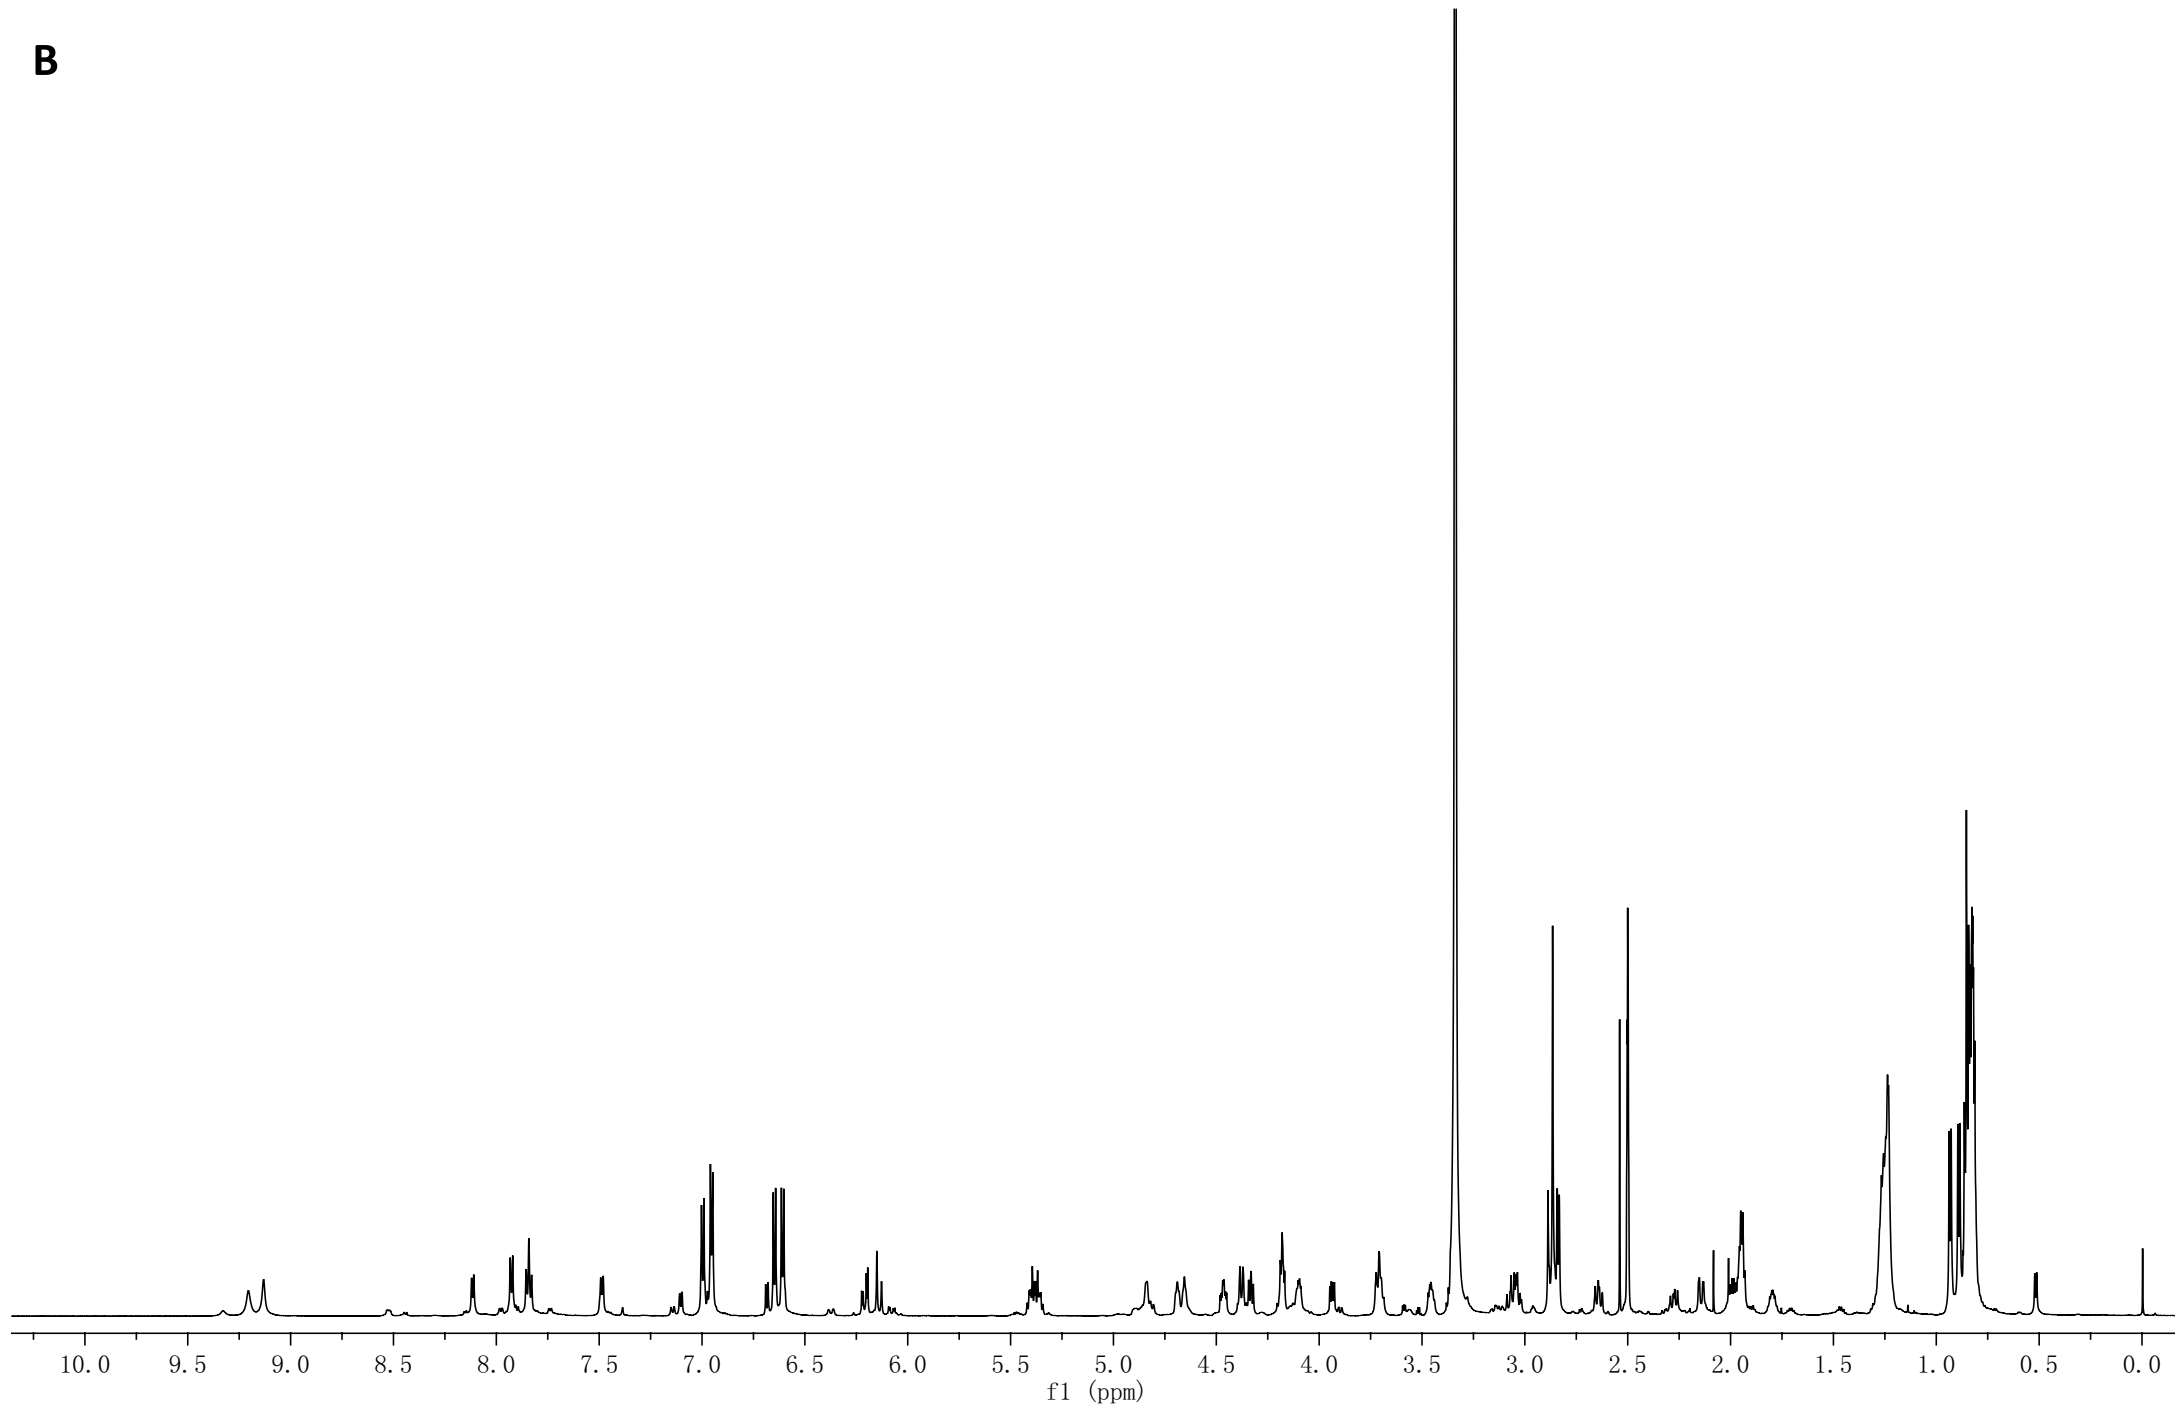

**Figure S2. Characterization of thalassospiramide A1 (3). (B)  $^1\text{H}$  spectrum in pyridine- $d_5$ .**

C

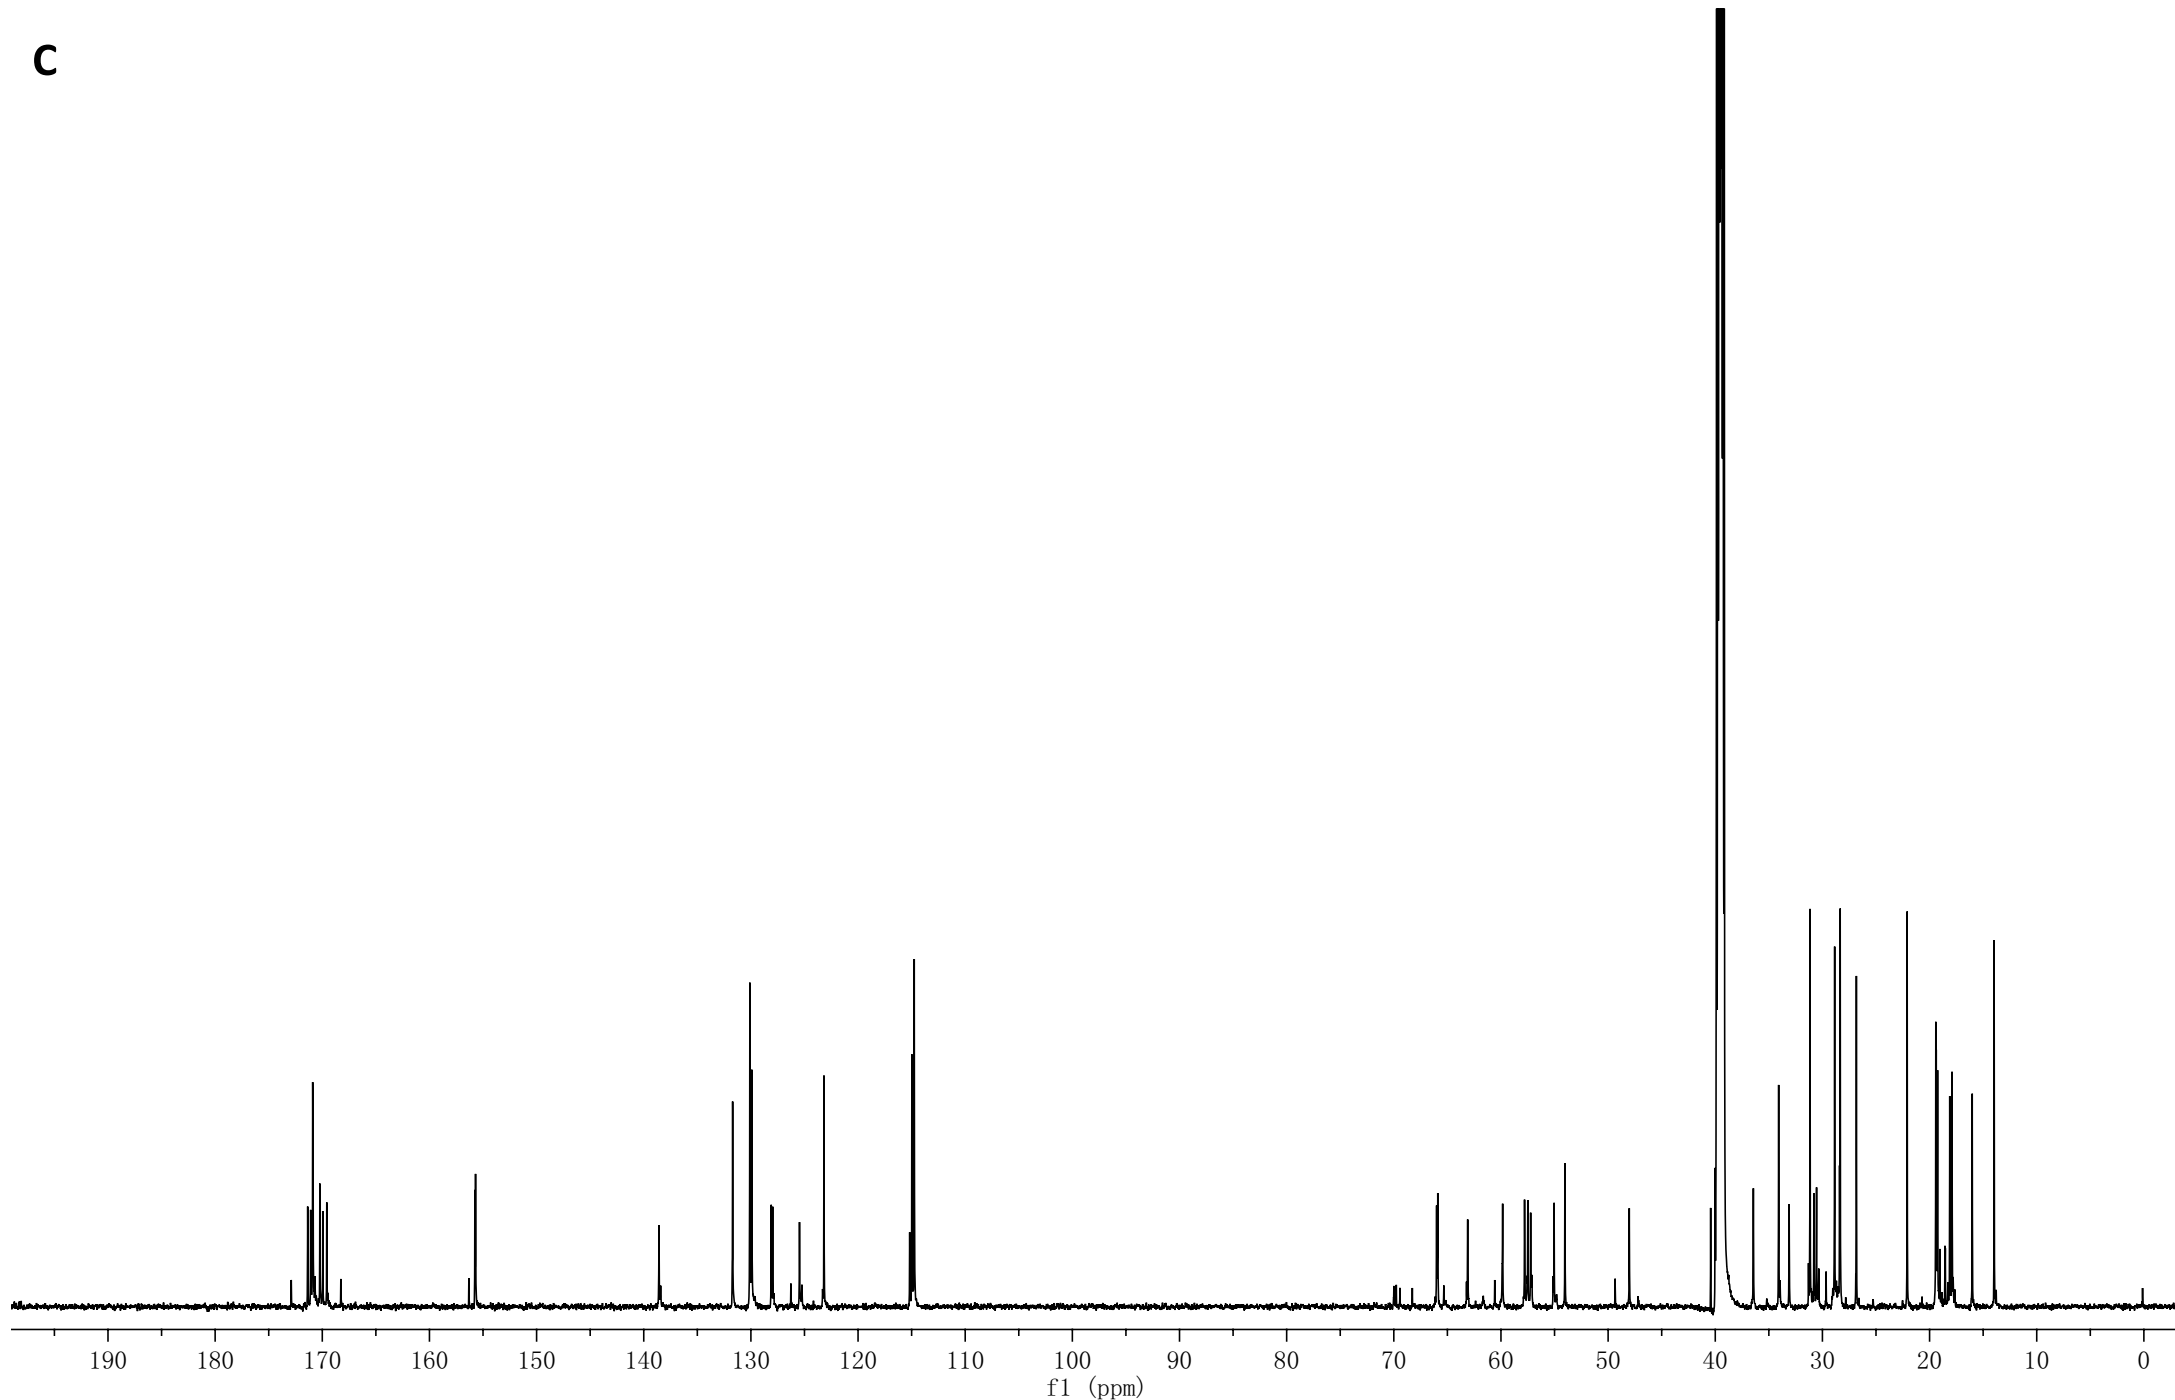

**Figure S2. Characterization of thalassospiramide A1 (3). (C)  $^{13}\text{C}$  spectrum in pyridine- $d_5$ .**

**D**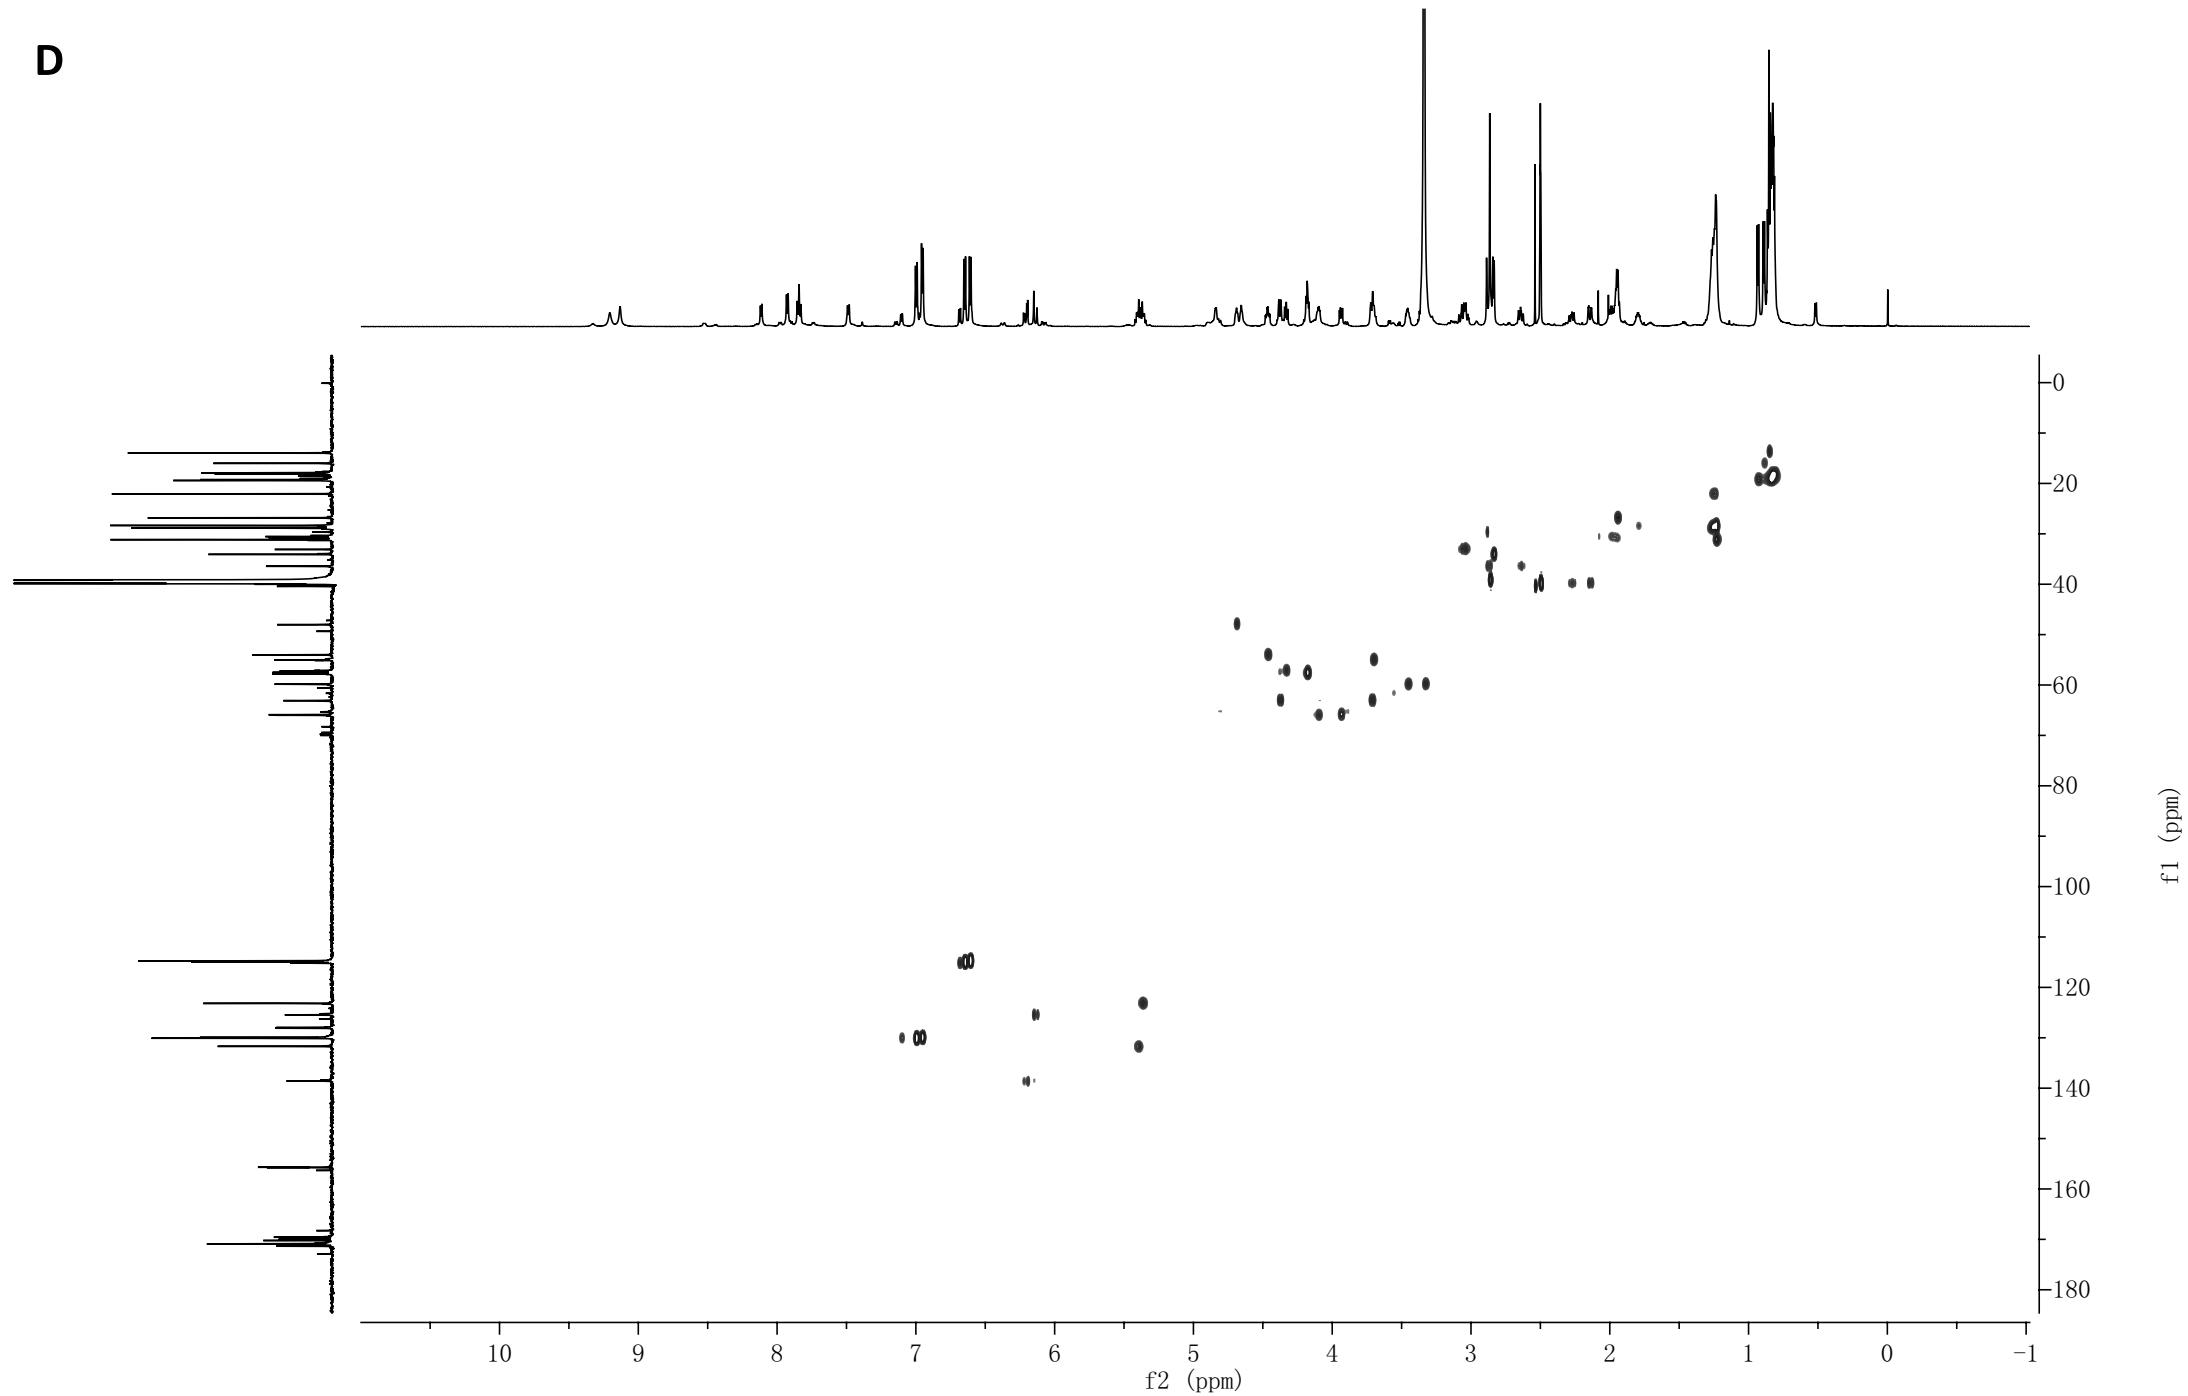

**Figure S2. Characterization of thalassospiramide A1 (3). (D) HSQC spectrum in pyridine- $d_5$ .**



**E**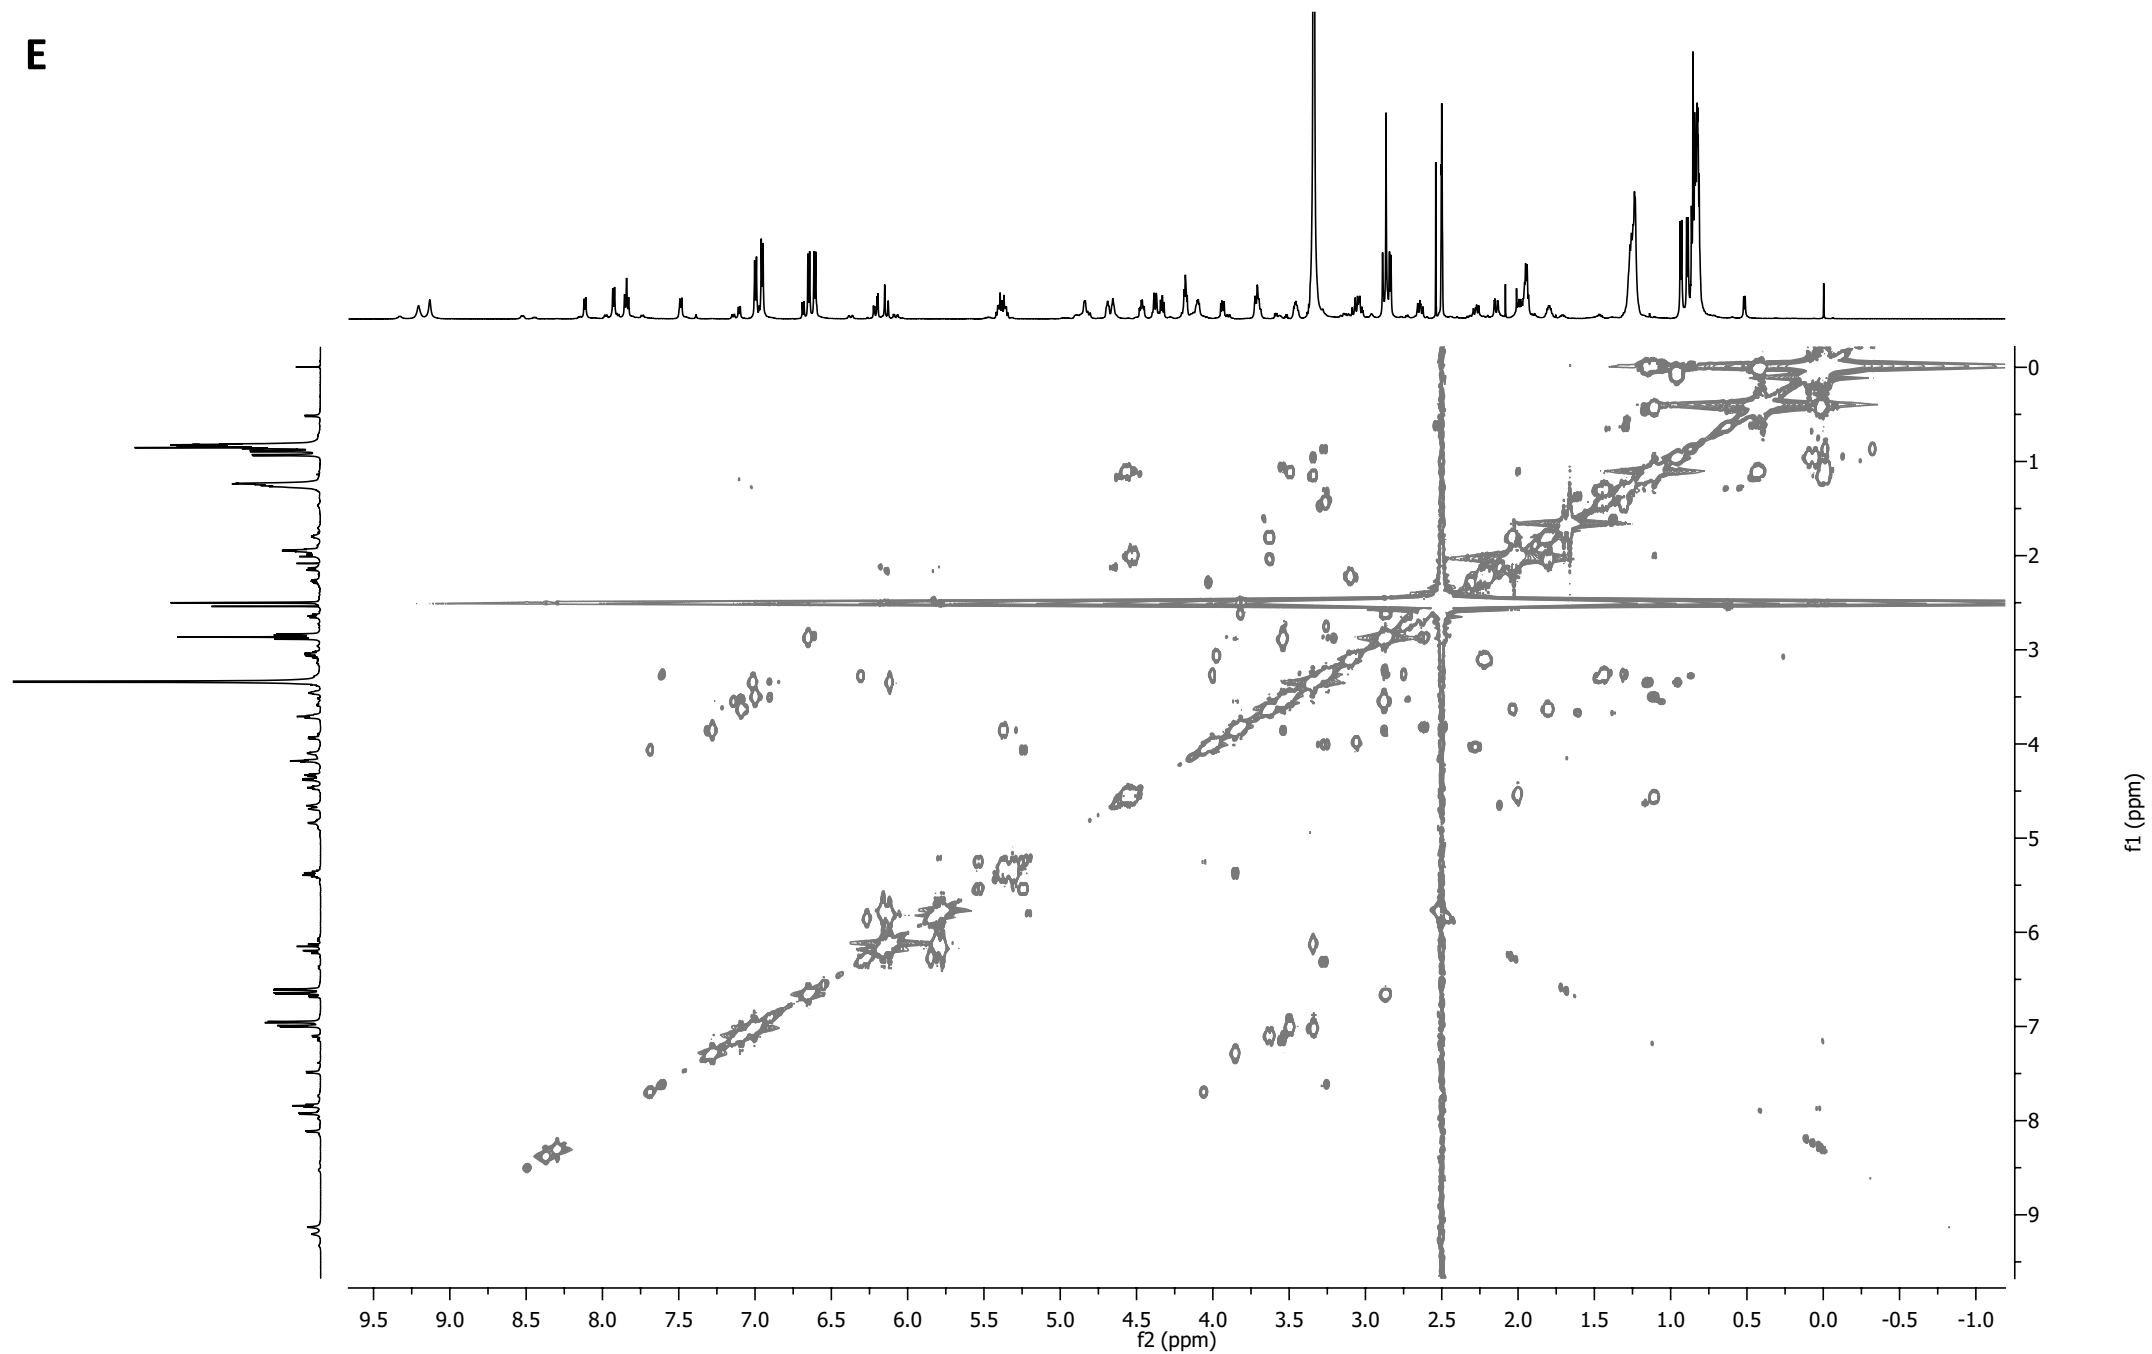

**Figure S2. Characterization of thalassospiramide A1 (3).** (E)  $^1\text{H}$ - $^1\text{H}$  COSY spectrum in pyridine- $d_5$ .

**F**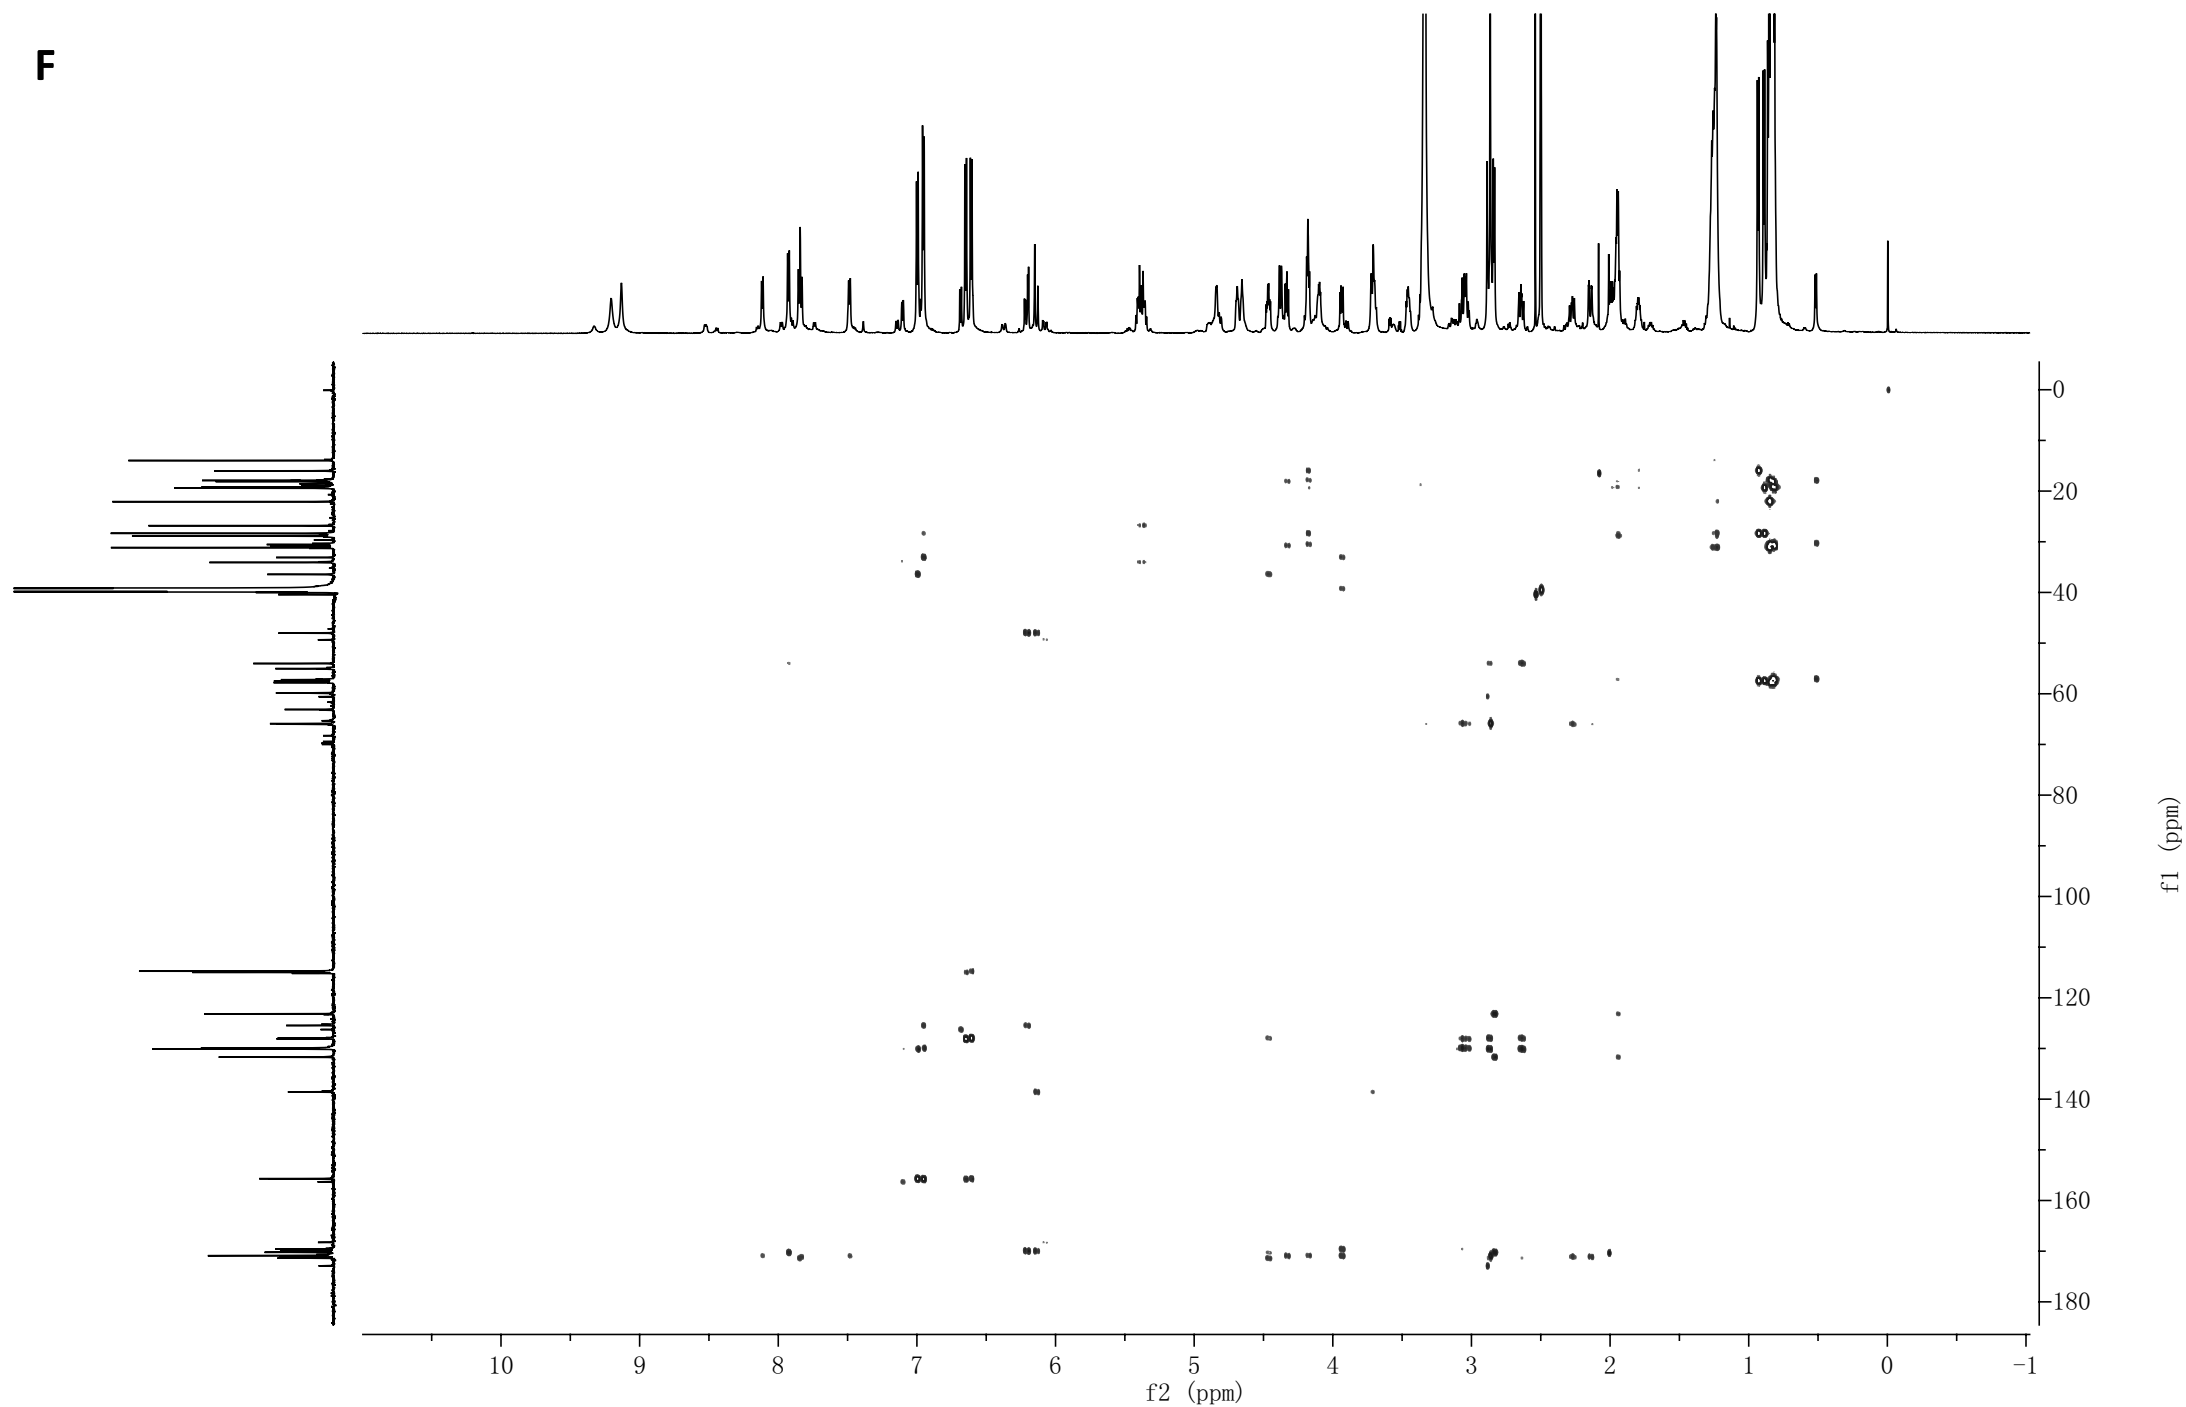

**Figure S2. Characterization of thalassospiramide A1. (F) HMBC spectrum in pyridine-*d*<sub>5</sub>.**

G

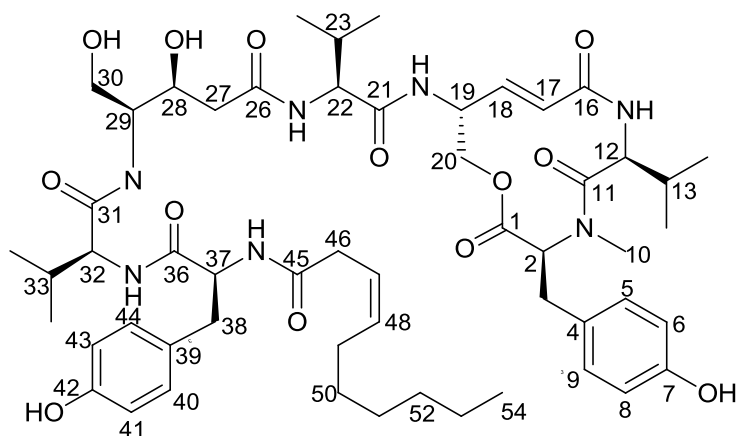NMR Spectral Data (700 MHz ( $^1\text{H}$ ), 175 MHz ( $^{13}\text{C}$ ) in  $\text{DMSO-}d_6$ ) of thalassospiramide A1 (**3**)

| C/H   | $\delta_{\text{H}}$ | mult ( $J$ in Hz) | $\delta_{\text{C}}$ |               | key HMBC    |
|-------|---------------------|-------------------|---------------------|---------------|-------------|
| 1     |                     |                   |                     | C             |             |
| 2     | 3.93                | dd(10.6,5.0)      | 65.9                | CH            | 1,3,4,10    |
| 3a    | 3.07                | dd(14.0,10.7)     | 33.1                | $\text{CH}_2$ |             |
| 3b    | 3.03                | dd(13.8,4.7)      |                     |               |             |
| 4     |                     |                   | 128                 | C             |             |
| 5     | 6.95                | d(8.4)            | 129.9               | CH            | 3,6,7       |
| 6     | 6.65                | d(8.4)            | 115                 | CH            | 4,7         |
| 7     |                     |                   | 155.8               | C             |             |
| 7-OH  | 6.68                | d(8.4)            |                     |               | 6,7,8       |
| 8     | 6.65                | d(8.4)            | 115                 | CH            | 4,7         |
| 9     | 6.95                | d(8.4)            | 129.9               | CH            | 3,7,8       |
| 10    | 2.86                | s                 | 40                  | $\text{CH}_3$ |             |
| 11    |                     |                   | 170.9               | C             |             |
| 12    | 4.18                | m                 | 57.4                | CH            | 11,13,15    |
| 12-NH | 6.96                | d(7.0)            |                     |               | 12,13,16,17 |
| 13    | 1.8                 | m                 | 28.4                | CH            |             |
| 14    | 0.93                | d(6.9)            | 19.4                | $\text{CH}_3$ |             |
| 15    | 0.89                | d(6.9)            | 16                  | $\text{CH}_3$ |             |
| 16    |                     |                   | 170                 | C             |             |
| 17    | 6.14                | d(15.8)           | 125.5               | CH            |             |
| 18    | 6.21                | dd(15.8,4.9)      | 138.6               | CH            |             |
| 19    | 4.69                | m                 | 48.4                | CH            |             |
| 19-NH | 8.12                | d(7.3)            |                     |               | 19,20,21    |
| 20a   | 4.38                | d(10.5)           | 63.1                | $\text{CH}_2$ |             |
| 20b   | 3.71                | m                 |                     |               |             |
| 21    |                     |                   | 170.9               | C             |             |
| 22    | 4.18                | m                 | 57.7                | CH            |             |
| 22-NH | 7.83                | d(9.3)            |                     |               | 22,23,26    |
| 23    | 1.99                | m                 | 30.5                | CH            |             |
| 24    | 0.84                | m                 | 19.4                | $\text{CH}_3$ |             |
| 25    | 0.84                | m                 | 18.1                | $\text{CH}_3$ |             |
| 26    |                     |                   | 171.1               | C             |             |
| 27a   | 2.28                | dd(14.4,9.8)      | 40.4                | $\text{CH}_2$ |             |
| 27b   | 2.15                | dd(14.3,2.7)      |                     |               |             |
| 28    | 4.1                 | m                 | 66.1                | CH            |             |

|       |      |               |       |                 |  |             |
|-------|------|---------------|-------|-----------------|--|-------------|
| 28-OH | 4.84 |               |       |                 |  | 27,28,29    |
| 29    | 3.7  | m             | 55    | CH              |  |             |
| 29-NH | 7.49 | d(8.5)        |       |                 |  | 28,29,30,31 |
| 30a   | 3.33 | m             | 59.9  | CH <sub>2</sub> |  |             |
| 30b   | 3.46 | m             |       |                 |  |             |
| 30-OH | 4.66 |               |       |                 |  | 29,30       |
| 31    |      |               | 170.9 | C               |  |             |
| 32    | 4.33 | dd(8.6,7.3)   | 57.1  | CH              |  |             |
| 32-NH | 7.85 | d(4.8)        |       |                 |  | 32,33,36    |
| 33    | 1.96 | m             | 30.8  | CH              |  |             |
| 34    | 0.84 | m             | 19.3  | CH <sub>3</sub> |  |             |
| 35    | 0.84 | m             | 17.9  | CH <sub>3</sub> |  |             |
| 36    |      |               | 171.4 | C               |  |             |
| 37    | 4.47 | td(9.1,4.1)   | 54    | CH              |  |             |
| 37-NH | 7.93 | d(8.2)        |       |                 |  | 37,38,45    |
| 38a   | 2.64 | dd(13.8,10.0) | 36.5  | CH <sub>2</sub> |  |             |
| 38b   | 2.89 | m             |       |                 |  |             |
| 39    |      |               | 127.7 |                 |  |             |
| 40    | 7    | d(8.4)        | 130.1 | CH              |  | 38,41,42    |
| 41    | 6.61 | d(8.4)        | 114.7 | CH              |  | 39,42       |
| 42    |      |               | 155.7 |                 |  |             |
| 42-OH | 7.1  | d(7.3)        |       |                 |  | 41,42,43    |
| 43    | 6.61 | d(8.4)        | 114.7 | CH              |  | 39,42       |
| 44    | 7    | d(8.4)        | 130.1 | CH              |  | 38,42,43    |
| 45    |      |               | 170.2 |                 |  |             |
| 46    | 2.84 | d(6.7)        | 34.1  | CH <sub>2</sub> |  |             |
| 47    | 5.4  | m             | 131.7 | CH              |  |             |
| 48    | 5.37 | m             | 123.2 | CH              |  |             |
| 49    | 1.94 | m             | 26.8  | CH <sub>2</sub> |  |             |
| 50    | 1.26 | m             | 28.9  | CH <sub>2</sub> |  |             |
| 51    | 1.24 | m             | 28.3  | CH <sub>2</sub> |  |             |
| 52    | 1.23 | m             | 31.2  | CH <sub>2</sub> |  |             |
| 53    | 1.26 | m             | 22.1  | CH <sub>2</sub> |  |             |
| 54    | 0.86 | t(7.0)        | 14    | CH <sub>3</sub> |  |             |

**Figure S2. Characterization of thalassospiramide A1 (3). (G) NMR assignment.**

**A** ESI-TOF-HRMS

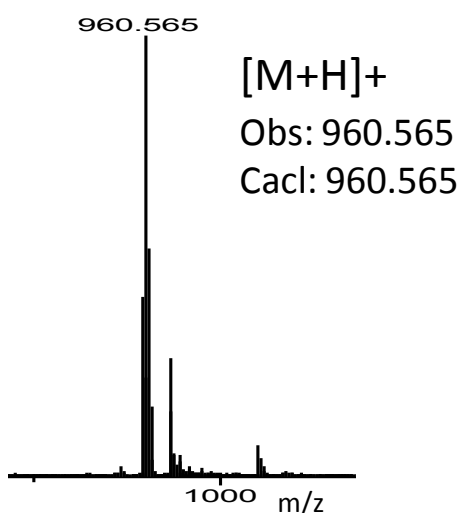

ITMS<sup>2</sup> – 960 m/z (1+)

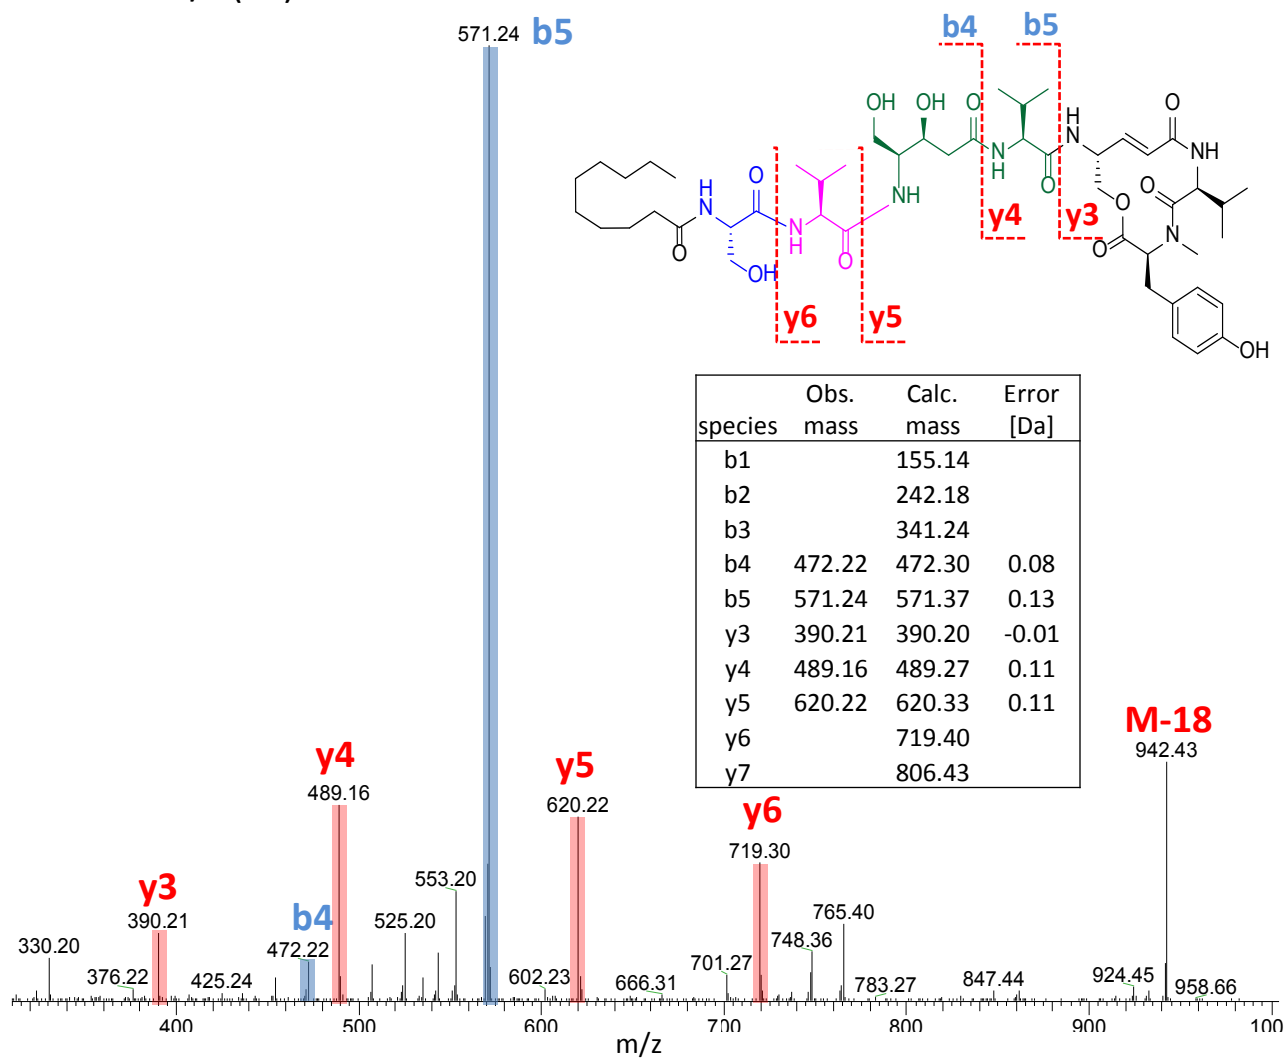

**Figure S3. Characterization of thalassospiramide A2 (4). (A) MS<sup>n</sup> analysis.**

# A ESI-TOF-HRMS

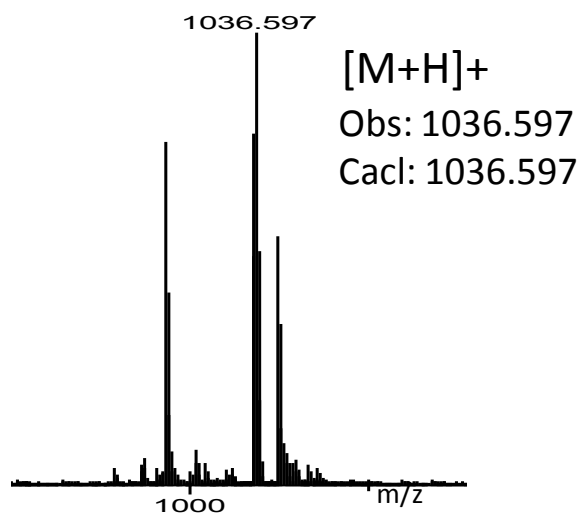

## ITMS<sup>2</sup> – 1036 m/z (1+)

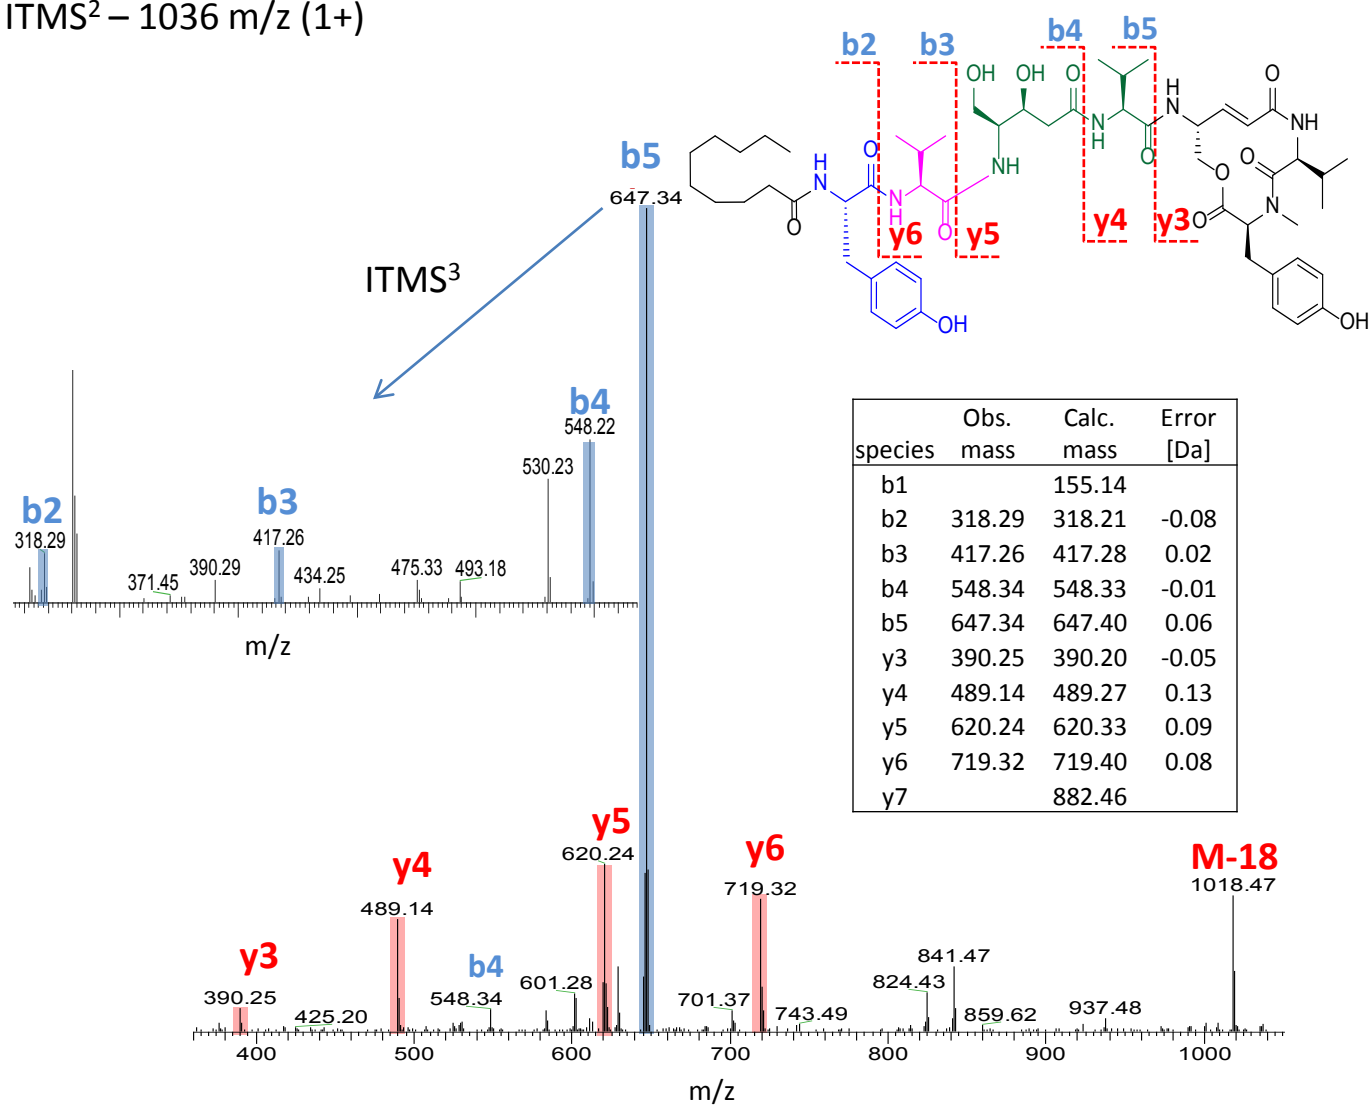

Figure S4. Characterization of thalassospiramide A3 (5). (A) MS<sup>n</sup> analysis.

# A ESI-TOF-HRMS

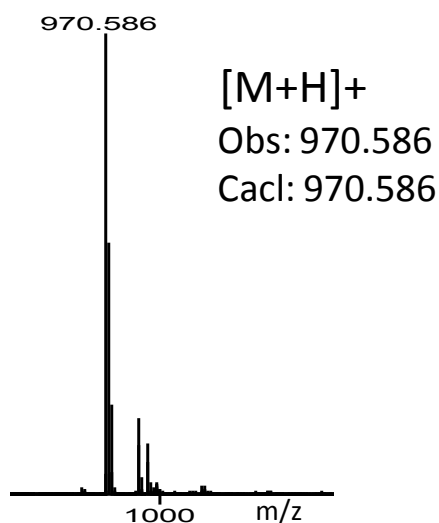

## ITMS<sup>2</sup> – 970 m/z (1+)

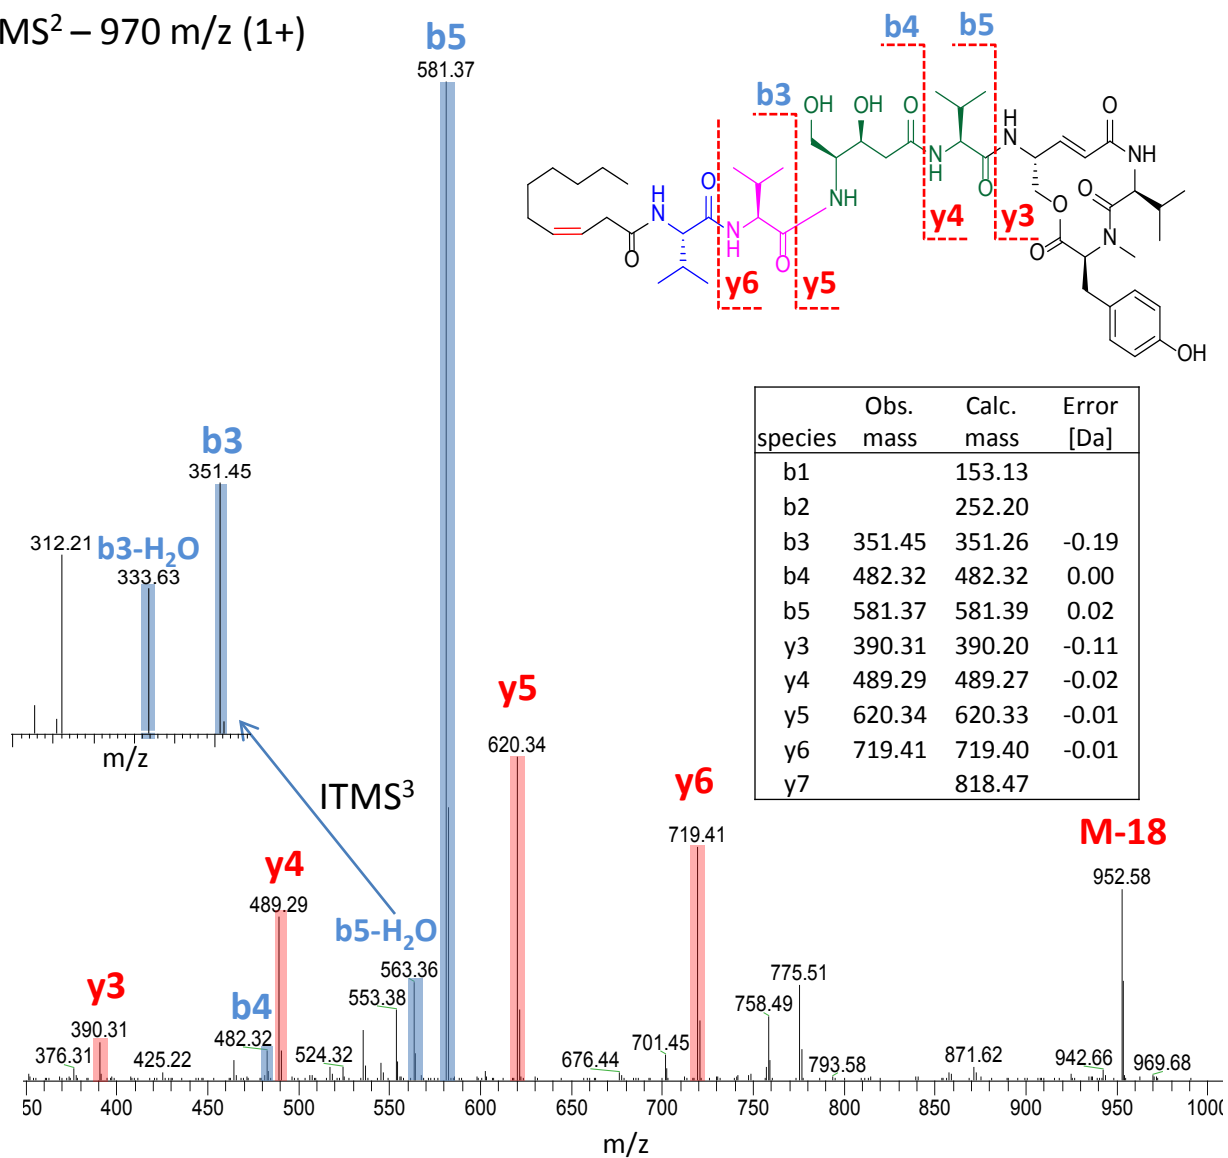

Figure S5. Characterization of thalassospiramide A4 (6). (A) MS<sup>n</sup> analysis.

**B**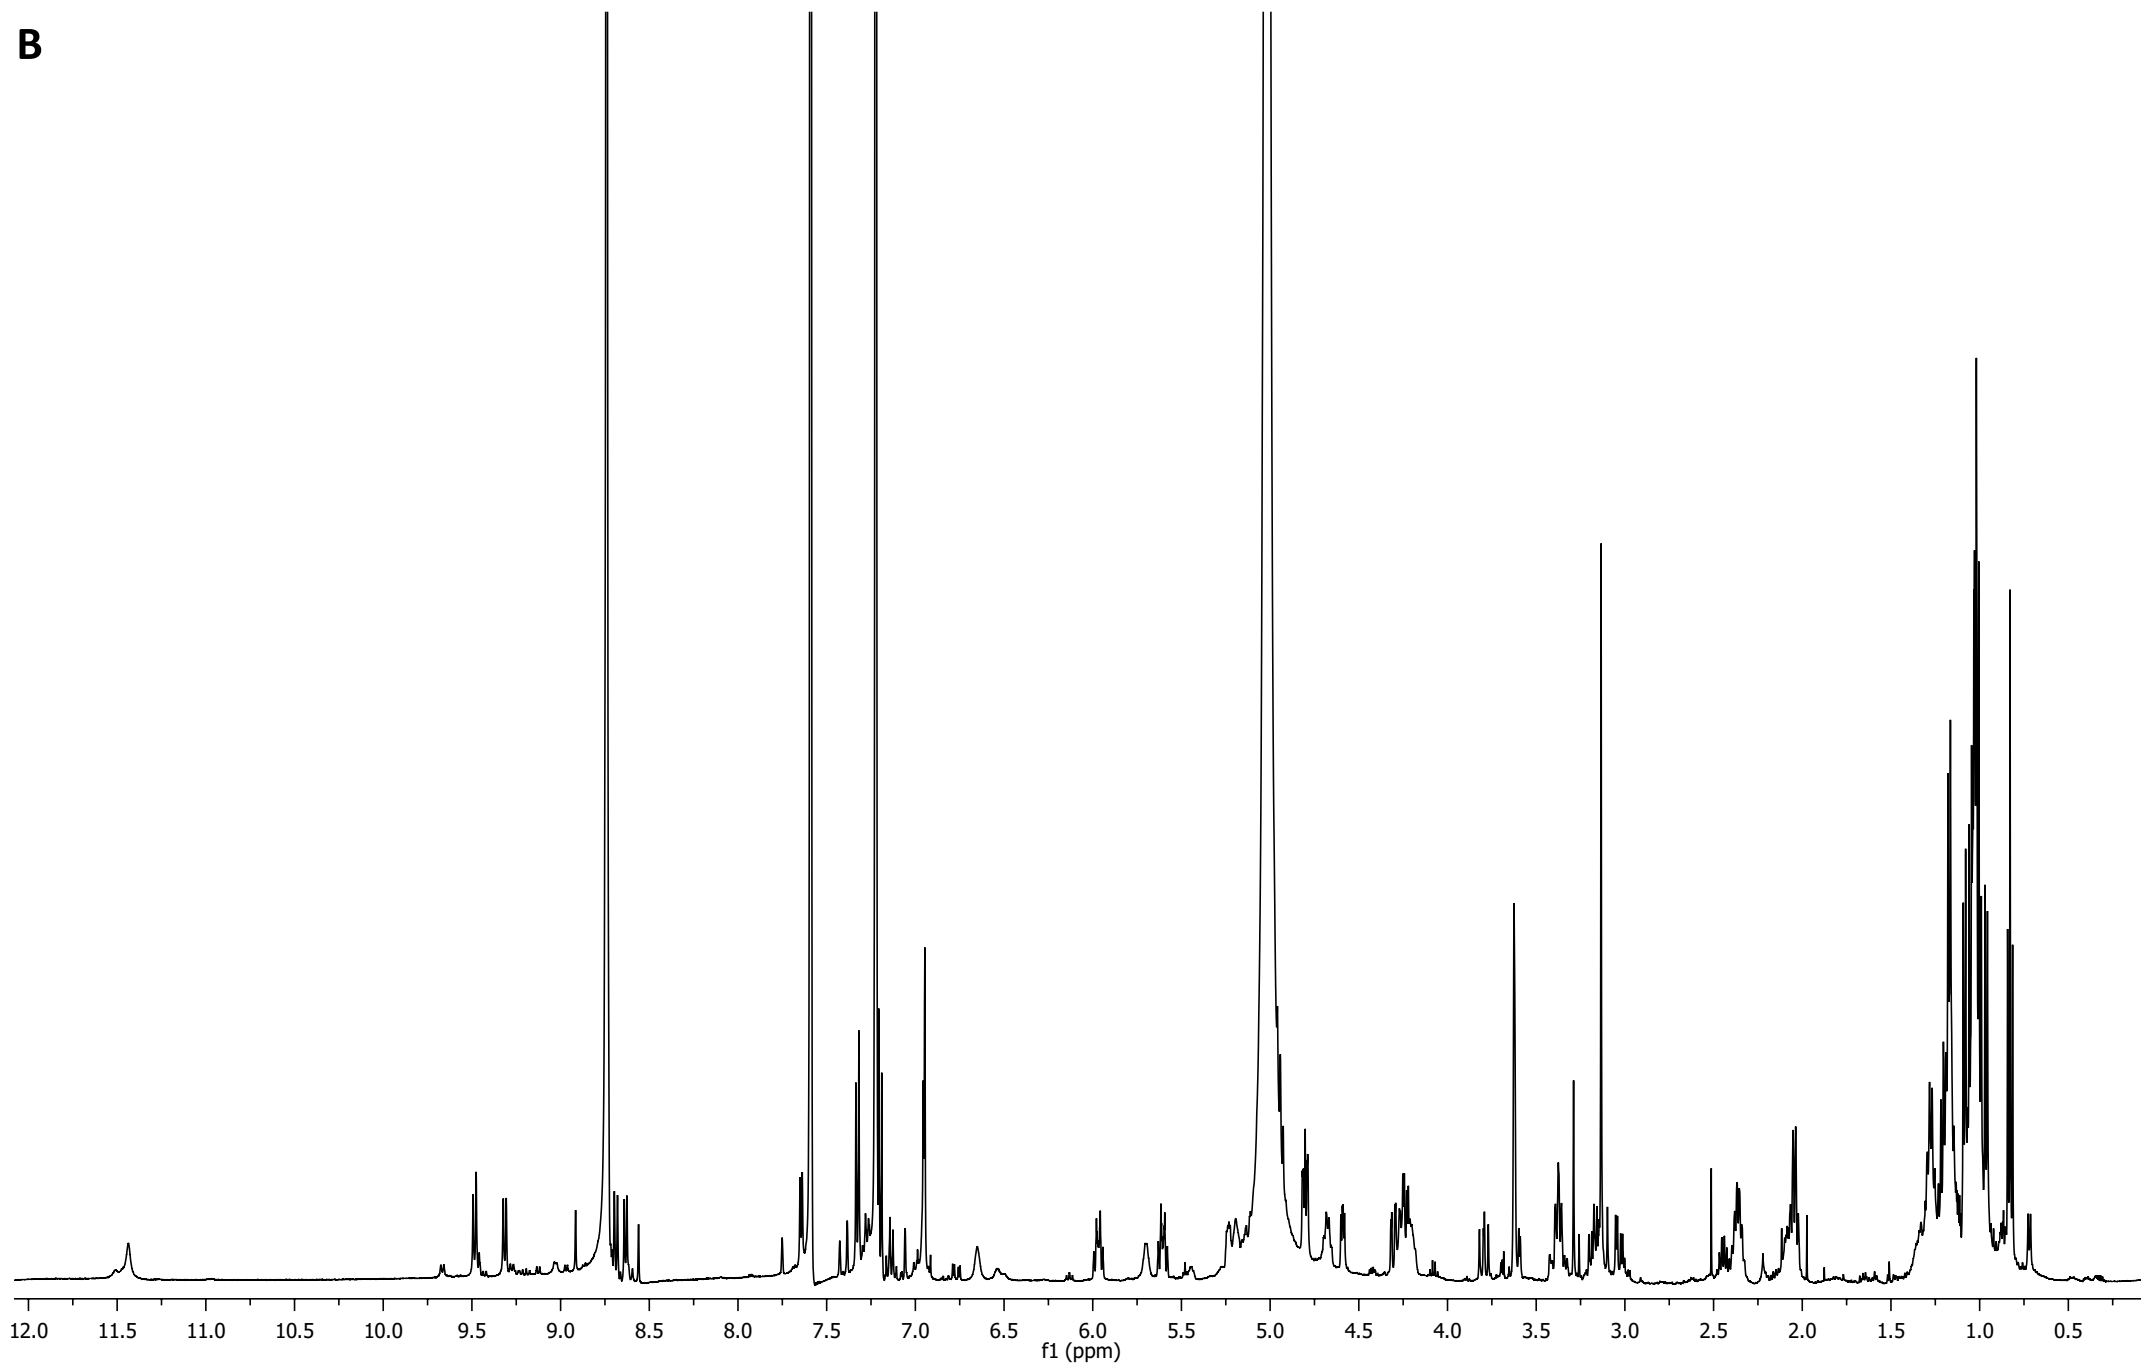

**Figure S5. Characterization of thalassospiramide A4 (6). (B)  $^1\text{H}$  spectrum in pyridine- $d_5$ .**



**C**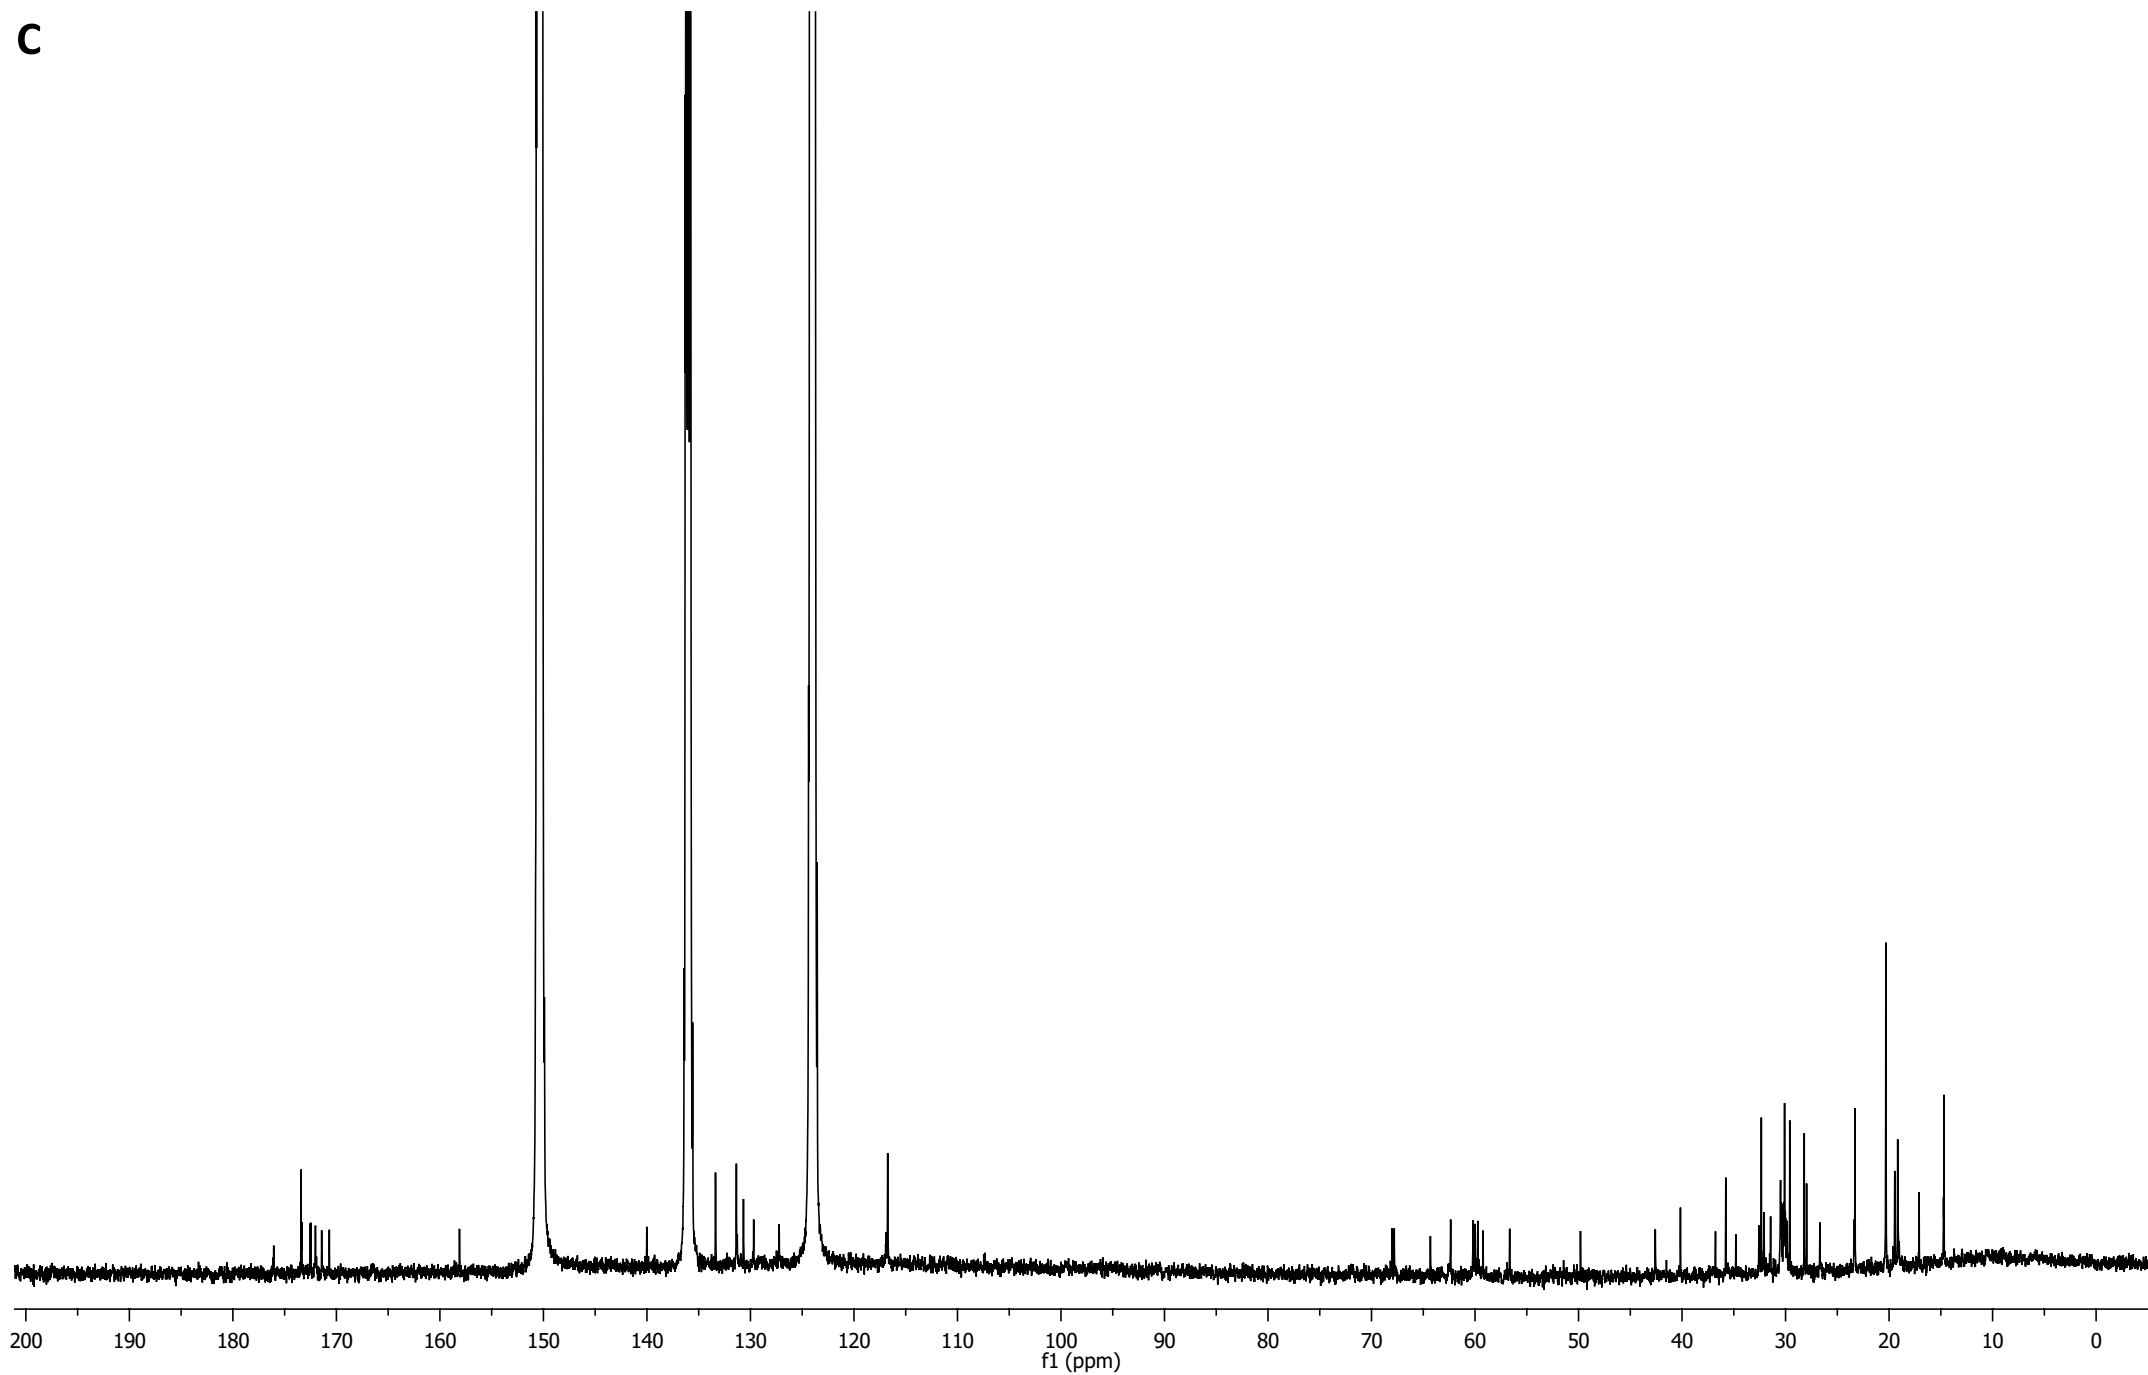

**Figure S5. Characterization of thalassospiramide A4 (6). (C)  $^{13}\text{C}$  spectrum in  $\text{pyridine-}d_5$ .**

**D**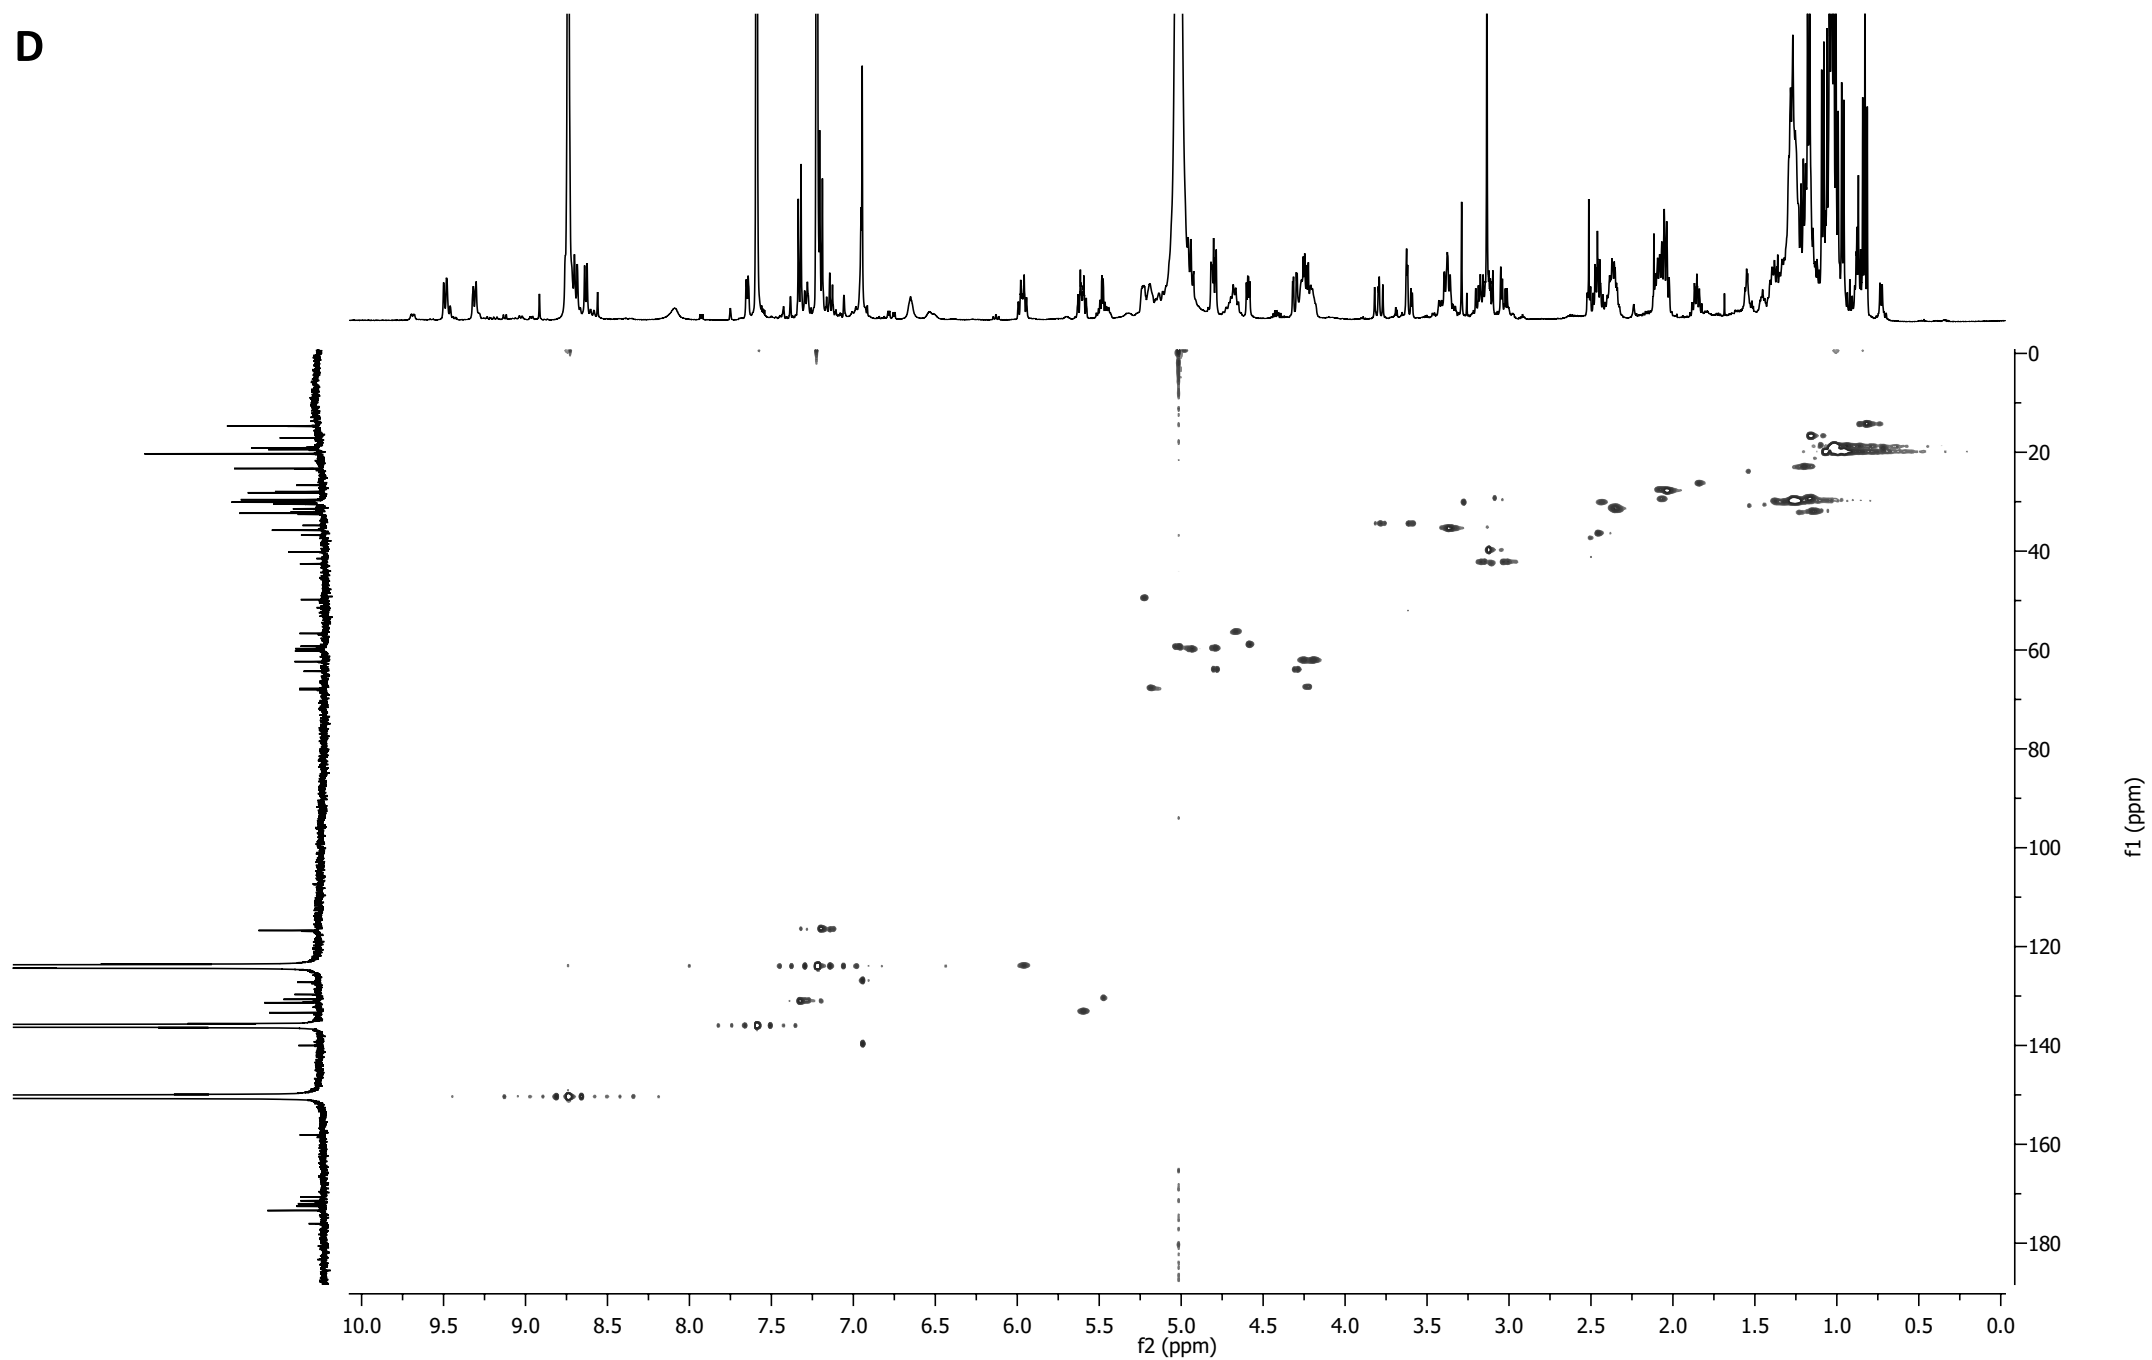

**Figure S5. Characterization of thalassospiramide A4 (6).** (D) HSQC spectrum in pyridine- $d_5$ .

**E**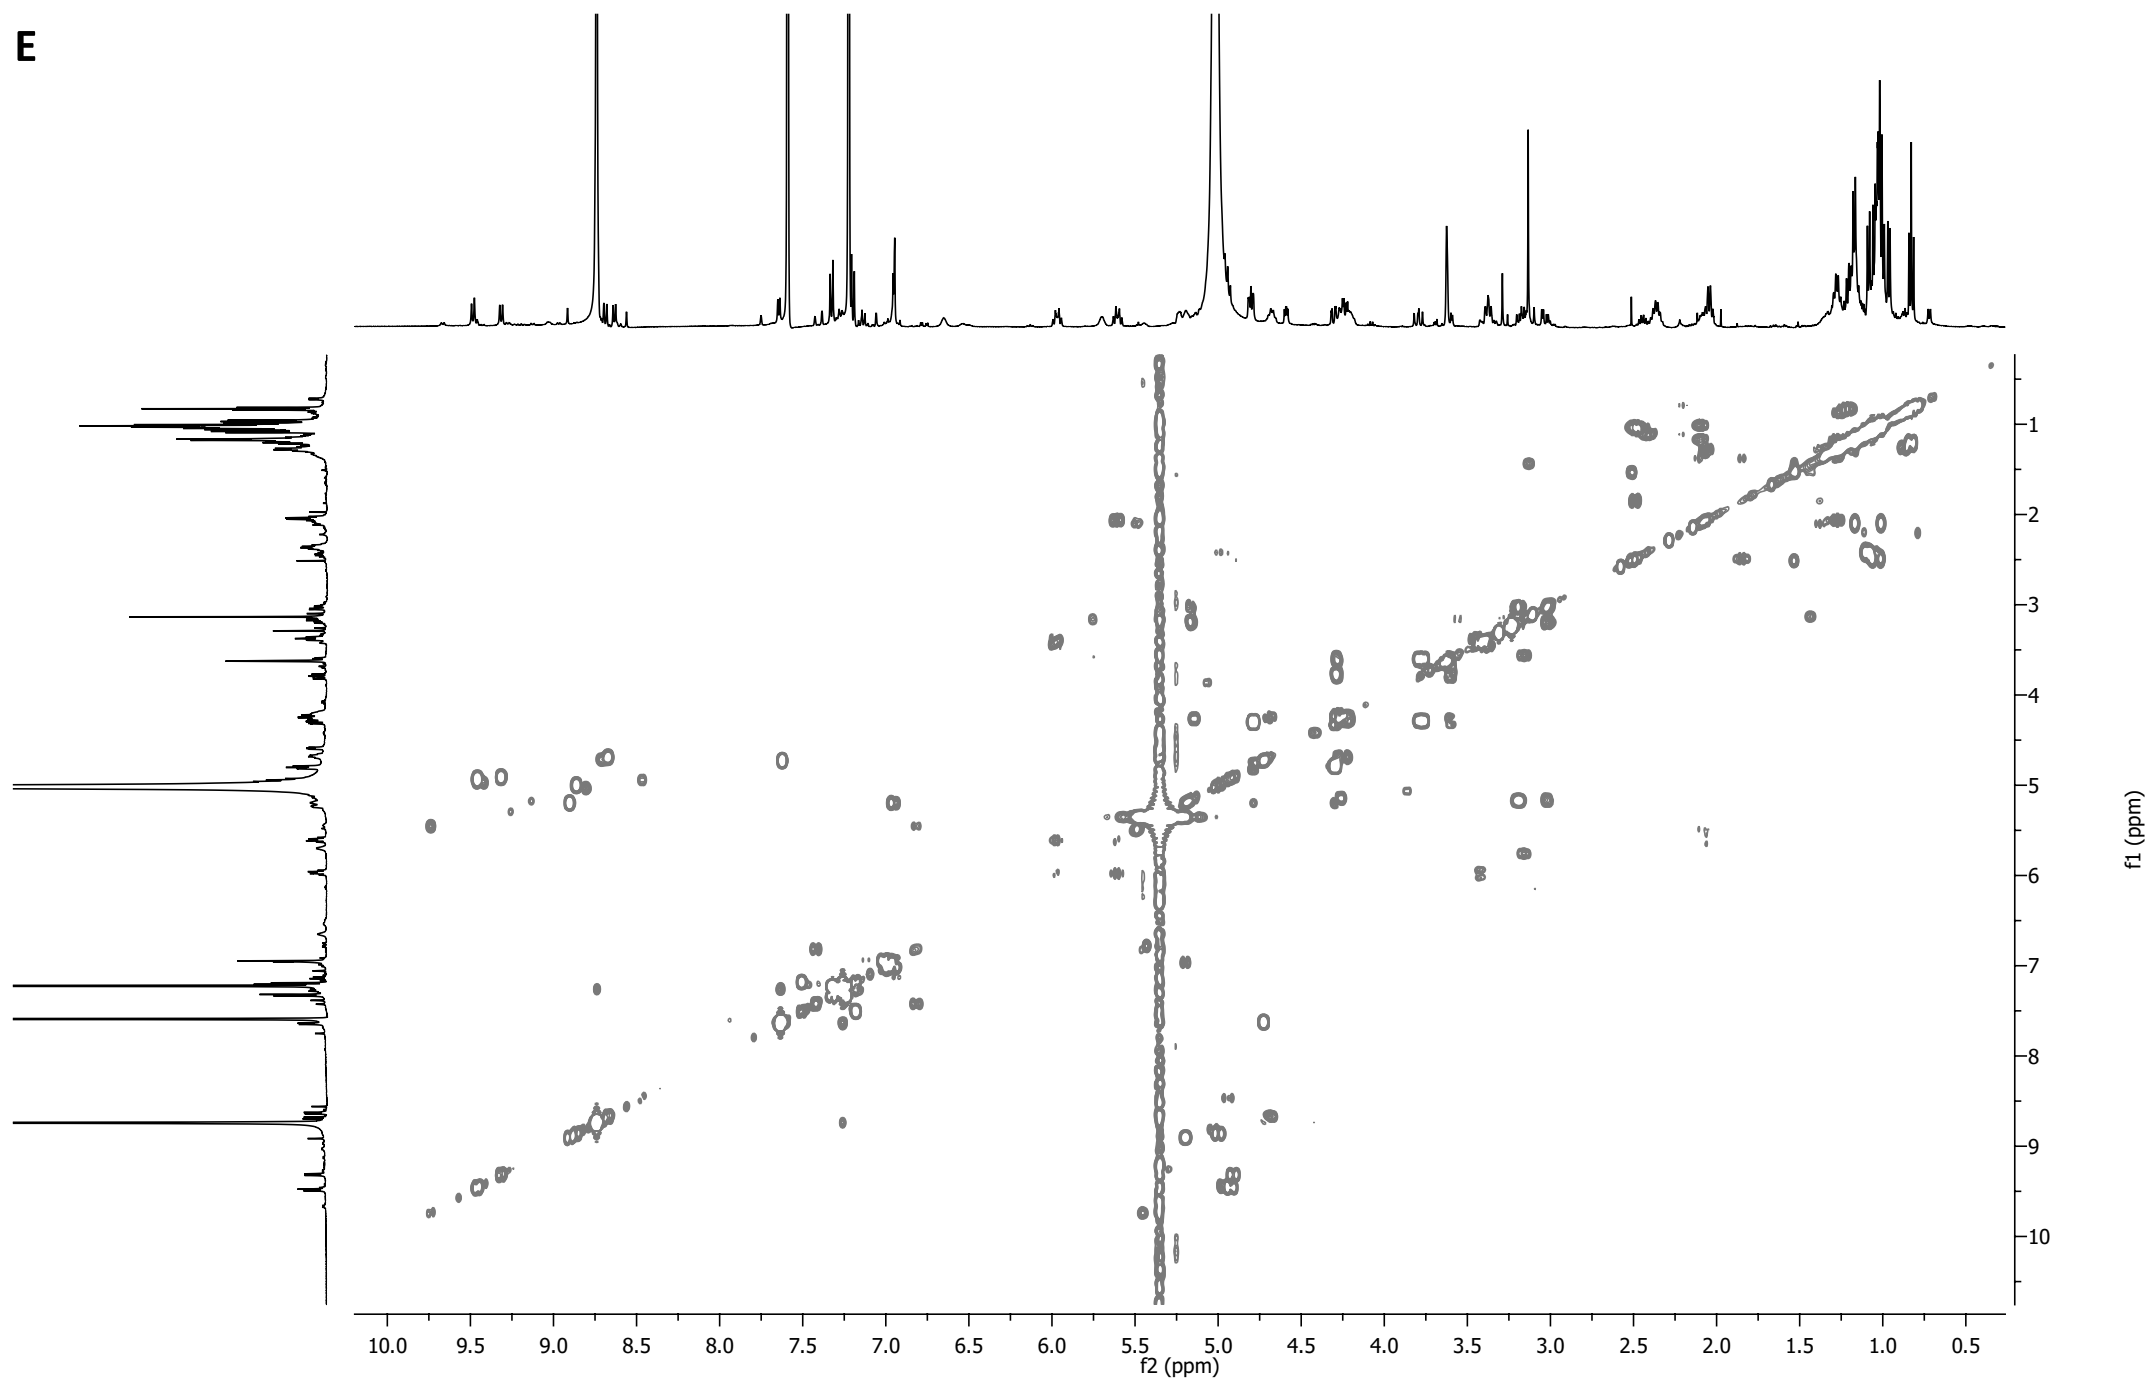

**Figure S5. Characterization of thalassospiramide A4 (6). (E)  $^1\text{H}$ - $^1\text{H}$  COSY spectrum in  $\text{pyridine-}d_5$ .**

**F**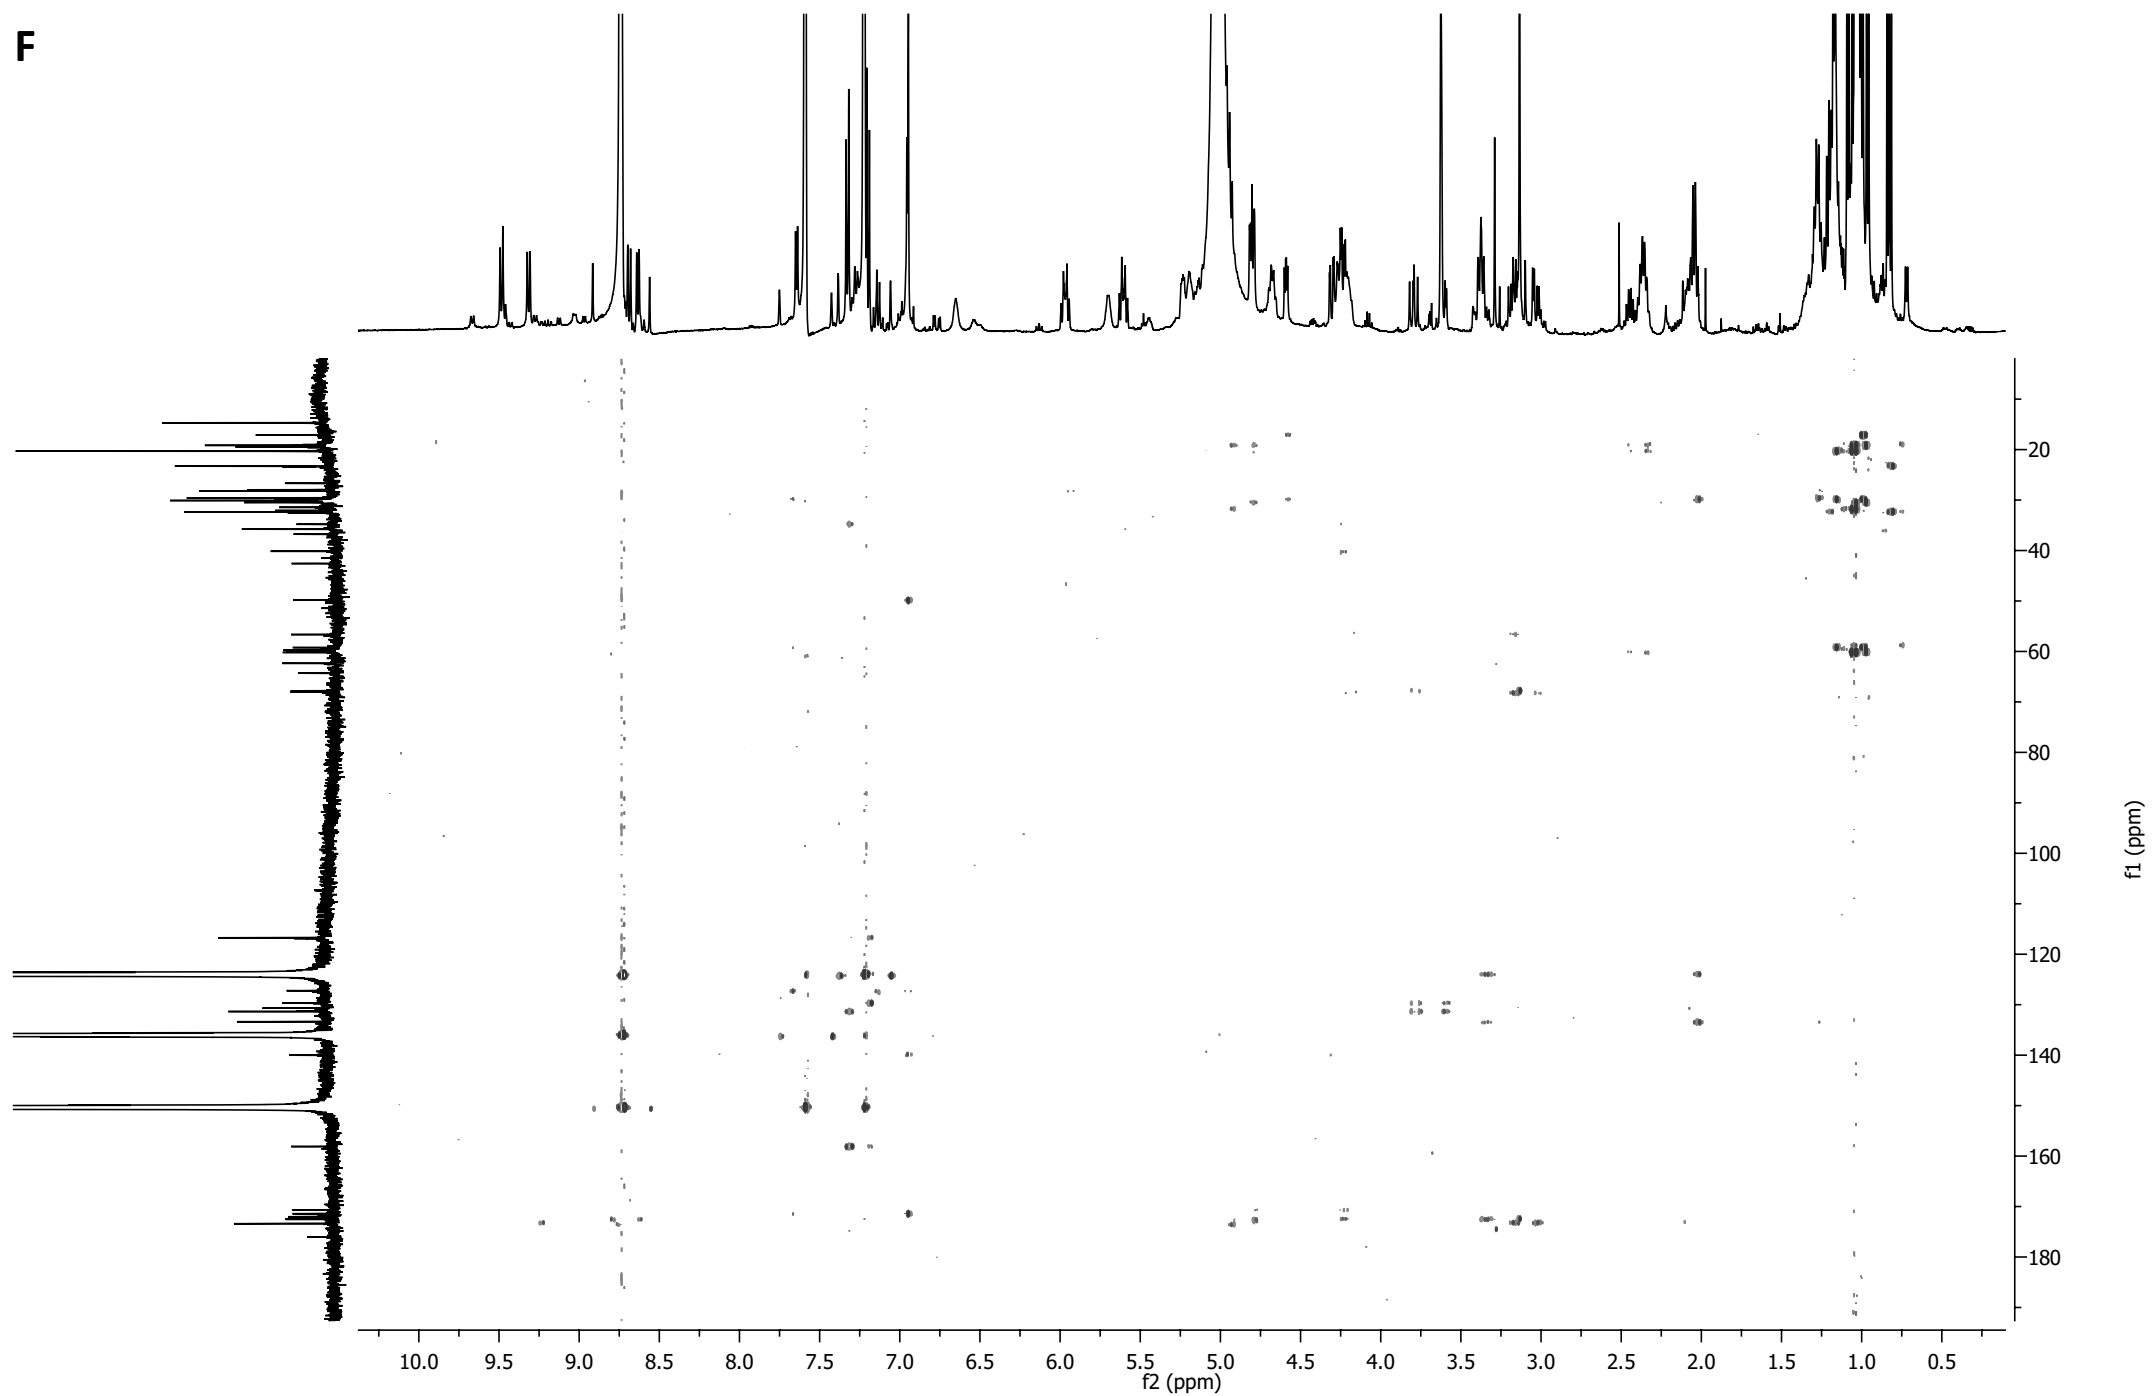

**Figure S5. Characterization of thalassospiramide A4 (6). (F) HMBC spectrum in pyridine- $d_5$ .**

G

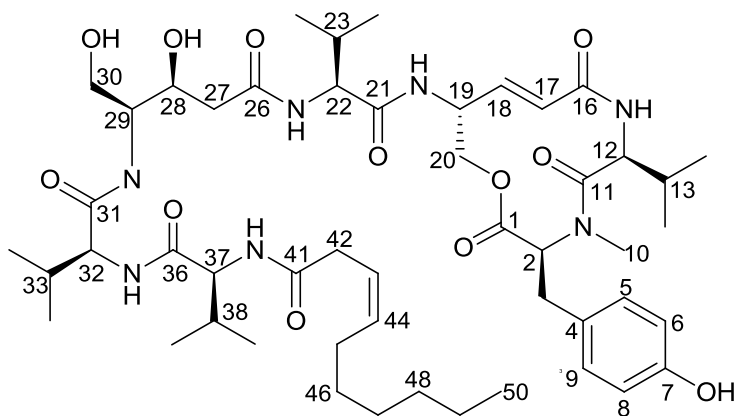NMR Spectral Data (500 MHz ( $^1\text{H}$ ), 125 MHz ( $^{13}\text{C}$ ) in pyridine- $d_5$ ) of thalassospiramide A4 (**6**)

| C/H   | $\delta_{\text{H}}$ | mult ( $J$ in Hz) | $\delta_{\text{C}}$ |                 | key HMBC   |
|-------|---------------------|-------------------|---------------------|-----------------|------------|
| 1     |                     |                   | 170.7               | C               |            |
| 2     | 4.26                | m                 | 67.8                | CH              | 1, 10      |
| 3a    | 3.61                | dd (14.0, 4.0)    | 34.8                | CH <sub>2</sub> | 4          |
| 3b    | 3.79                | dd (14.0, 11.0)   |                     |                 | 4          |
| 4     |                     |                   | 129.7               | C               |            |
| 5     | 7.33                | d (8.3)           | 131.4               | CH              | 3          |
| 6     | 7.19                | d (8.3)           | 116.7               | CH              | 3          |
| 7     |                     |                   | 158.0               | C               |            |
| 7-OH  |                     |                   |                     |                 |            |
| 8     | 7.19                | d (8.3)           | 116.7               | CH              | 3          |
| 9     | 7.33                | d (8.3)           | 131.4               | CH              | 3          |
| 10    | 3.12                | s                 | 40.0                | CH <sub>3</sub> | 2, 11      |
| 11    |                     |                   | 172.5               | C               |            |
| 12    | 4.58                | dd (6.2, 4.1)     | 59.2                | CH              |            |
| 12-NH | 7.64                | d (6.3)           |                     |                 | 16, 17     |
| 13    | 2.08                | m                 | 29.6                | CH              | 15         |
| 14    | 0.99                | d (7.0)           | 20.2                | CH <sub>3</sub> |            |
| 15    | 1.17                | d (7.0)           | 17.0                | CH <sub>3</sub> |            |
| 16    |                     |                   | 171.4               | C               |            |
| 17    | 6.94                | m                 | 127.2               | CH              | 16, 18, 19 |
| 18    | 6.95                | m                 | 139.8               | CH              | 16, 18, 19 |
| 19    | 5.19                | m                 | 49.8                | CH              |            |
| 19-NH | 8.63                | d (7.5)           |                     |                 |            |
| 20a   | 4.81                | m                 | 64.2                | CH <sub>2</sub> | 1          |
| 20b   | 4.31                | d (11.2, 2.3)     |                     |                 | 1          |
| 21    |                     |                   | 172.5               | C               |            |
| 22    | 4.79                | m                 | 60.0                | CH              |            |
| 22-NH | 9.30                |                   |                     |                 | 26         |
| 23    | 2.44                | m                 | 30.1                | CH              |            |
| 24    | 0.97                | d (6.8)           | 20.2                | CH <sub>3</sub> |            |
| 25    | 1.03                | d (6.8)           | 19.2                | CH <sub>3</sub> |            |
| 26    |                     |                   | 173.4               | C               |            |
| 27a   | 3.19                | dd (14.2, 8.2)    | 42.6                | CH <sub>2</sub> | 26         |
| 27b   | 3.03                | dd (14.3, 5.3)    |                     |                 |            |
| 28    | 5.11                | m                 | 68.0                | CH              |            |
| 28-OH |                     |                   |                     |                 |            |
| 29    | 4.65                | m                 | 56.7                | CH              |            |

|       |      |                    |       |                 |    |
|-------|------|--------------------|-------|-----------------|----|
| 29-NH |      |                    |       |                 |    |
| 30a   | 4.24 | dd (11.0, 4.3)     | 62.4  | CH <sub>2</sub> |    |
| 30b   | 4.30 | m                  |       |                 |    |
| 30-OH | 6.61 |                    |       |                 |    |
| 31    |      |                    | 172.0 | C               |    |
| 32    | 5.00 | m                  | 59.7  | CH              |    |
| 32-NH | 8.78 |                    |       |                 | 36 |
| 33    | 2.33 | m                  | 31.5  | CH              |    |
| 34    | 1.04 | d (6.9)            | 19.2  | CH <sub>3</sub> |    |
| 35    | 1.05 | d (6.9)            | 19.5  | CH <sub>3</sub> |    |
| 36    |      |                    | 173.4 | C               |    |
| 37    | 4.93 | m                  | 60.2  | CH <sub>2</sub> | 36 |
| 37-NH | 8.78 | m                  |       |                 | 41 |
| 38    | 2.33 | m                  | 32.1  | CH              |    |
| 39    | 1.05 | d (7.0)            | 19.2  | CH <sub>3</sub> |    |
| 40    | 1.04 | d (7.0)            | 20.2  | CH <sub>3</sub> |    |
| 41    |      |                    | 172.5 | C               |    |
| 42    | 3.37 | m                  | 35.8  | CH <sub>2</sub> |    |
| 43    | 5.94 | dt(10.7, 7.0, 2.0) | 123.5 | CH              |    |
| 44    | 5.59 | dt(10.7, 7.0, 1.5) | 133.4 | CH              |    |
| 45    | 2.01 | m                  | 28.2  | CH <sub>2</sub> |    |
| 46    | 1.27 | m                  | 29.9  | CH <sub>2</sub> |    |
| 47    | 1.17 | m                  | 29.6  | CH <sub>2</sub> |    |
| 48    | 1.15 | m                  | 32.3  | CH <sub>2</sub> |    |
| 49    | 1.17 | m                  | 23.4  | CH <sub>2</sub> |    |
| 50    | 0.80 | t (7.0)            | 14.6  | CH <sub>3</sub> |    |

**Figure S5. Characterization of thalassospiramide A4 (6). (G) NMR assignment.**

# A ESI-TOF-HRMS

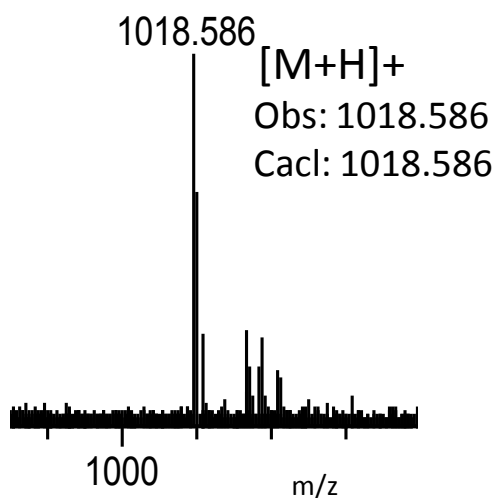

ITMS<sup>2</sup> – 1018 m/z (1+)

ITMS<sup>3</sup>

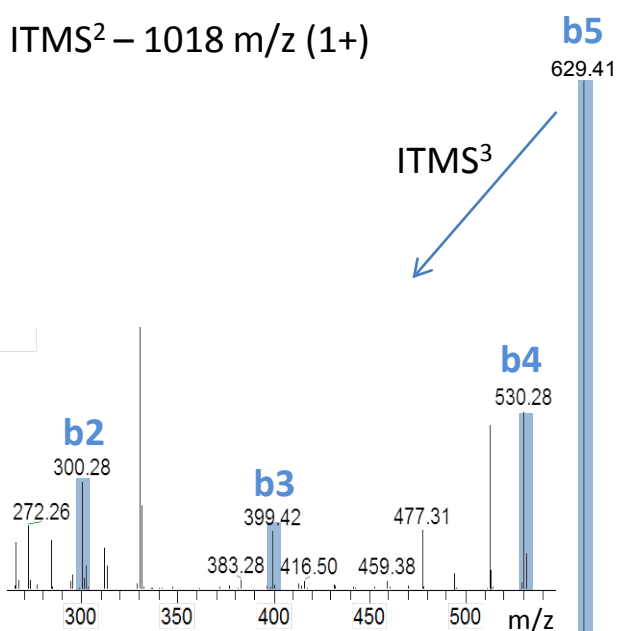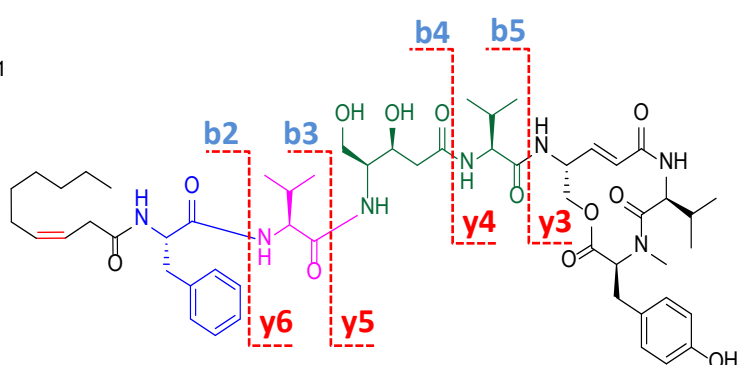

| species | Obs. mass | Calc. mass | Error [Da] |
|---------|-----------|------------|------------|
| b1      |           | 153.13     |            |
| b2      | 300.25    | 300.20     | -0.05      |
| b3      | 399.42    | 399.26     | -0.16      |
| b4      | 530.28    | 530.32     | 0.04       |
| b5      | 629.41    | 629.39     | -0.02      |
| y3      | 390.31    | 390.21     | -0.10      |
| y4      | 489.26    | 489.27     | 0.01       |
| y5      | 620.34    | 620.33     | -0.01      |
| y6      | 719.43    | 719.40     | -0.03      |
| y7      |           | 866.47     |            |

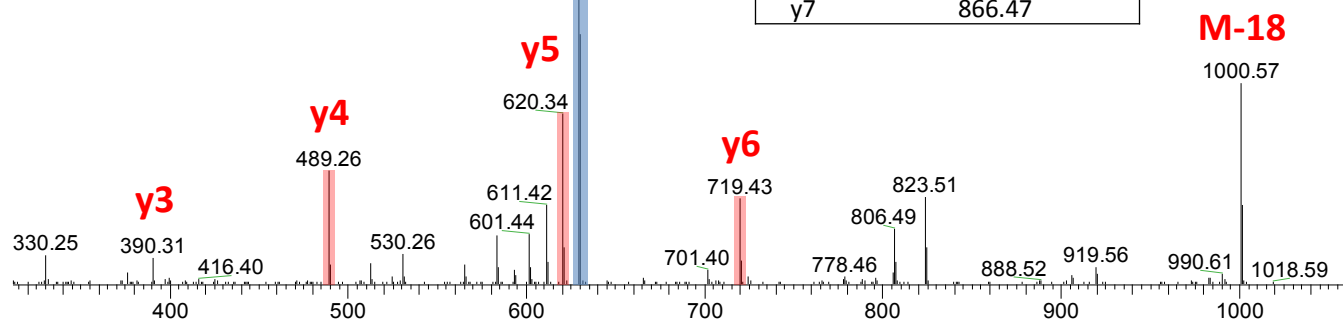

Figure S6. Characterization of thalassospiramide A5 (11). (A) MS<sup>n</sup> analysis.

**B**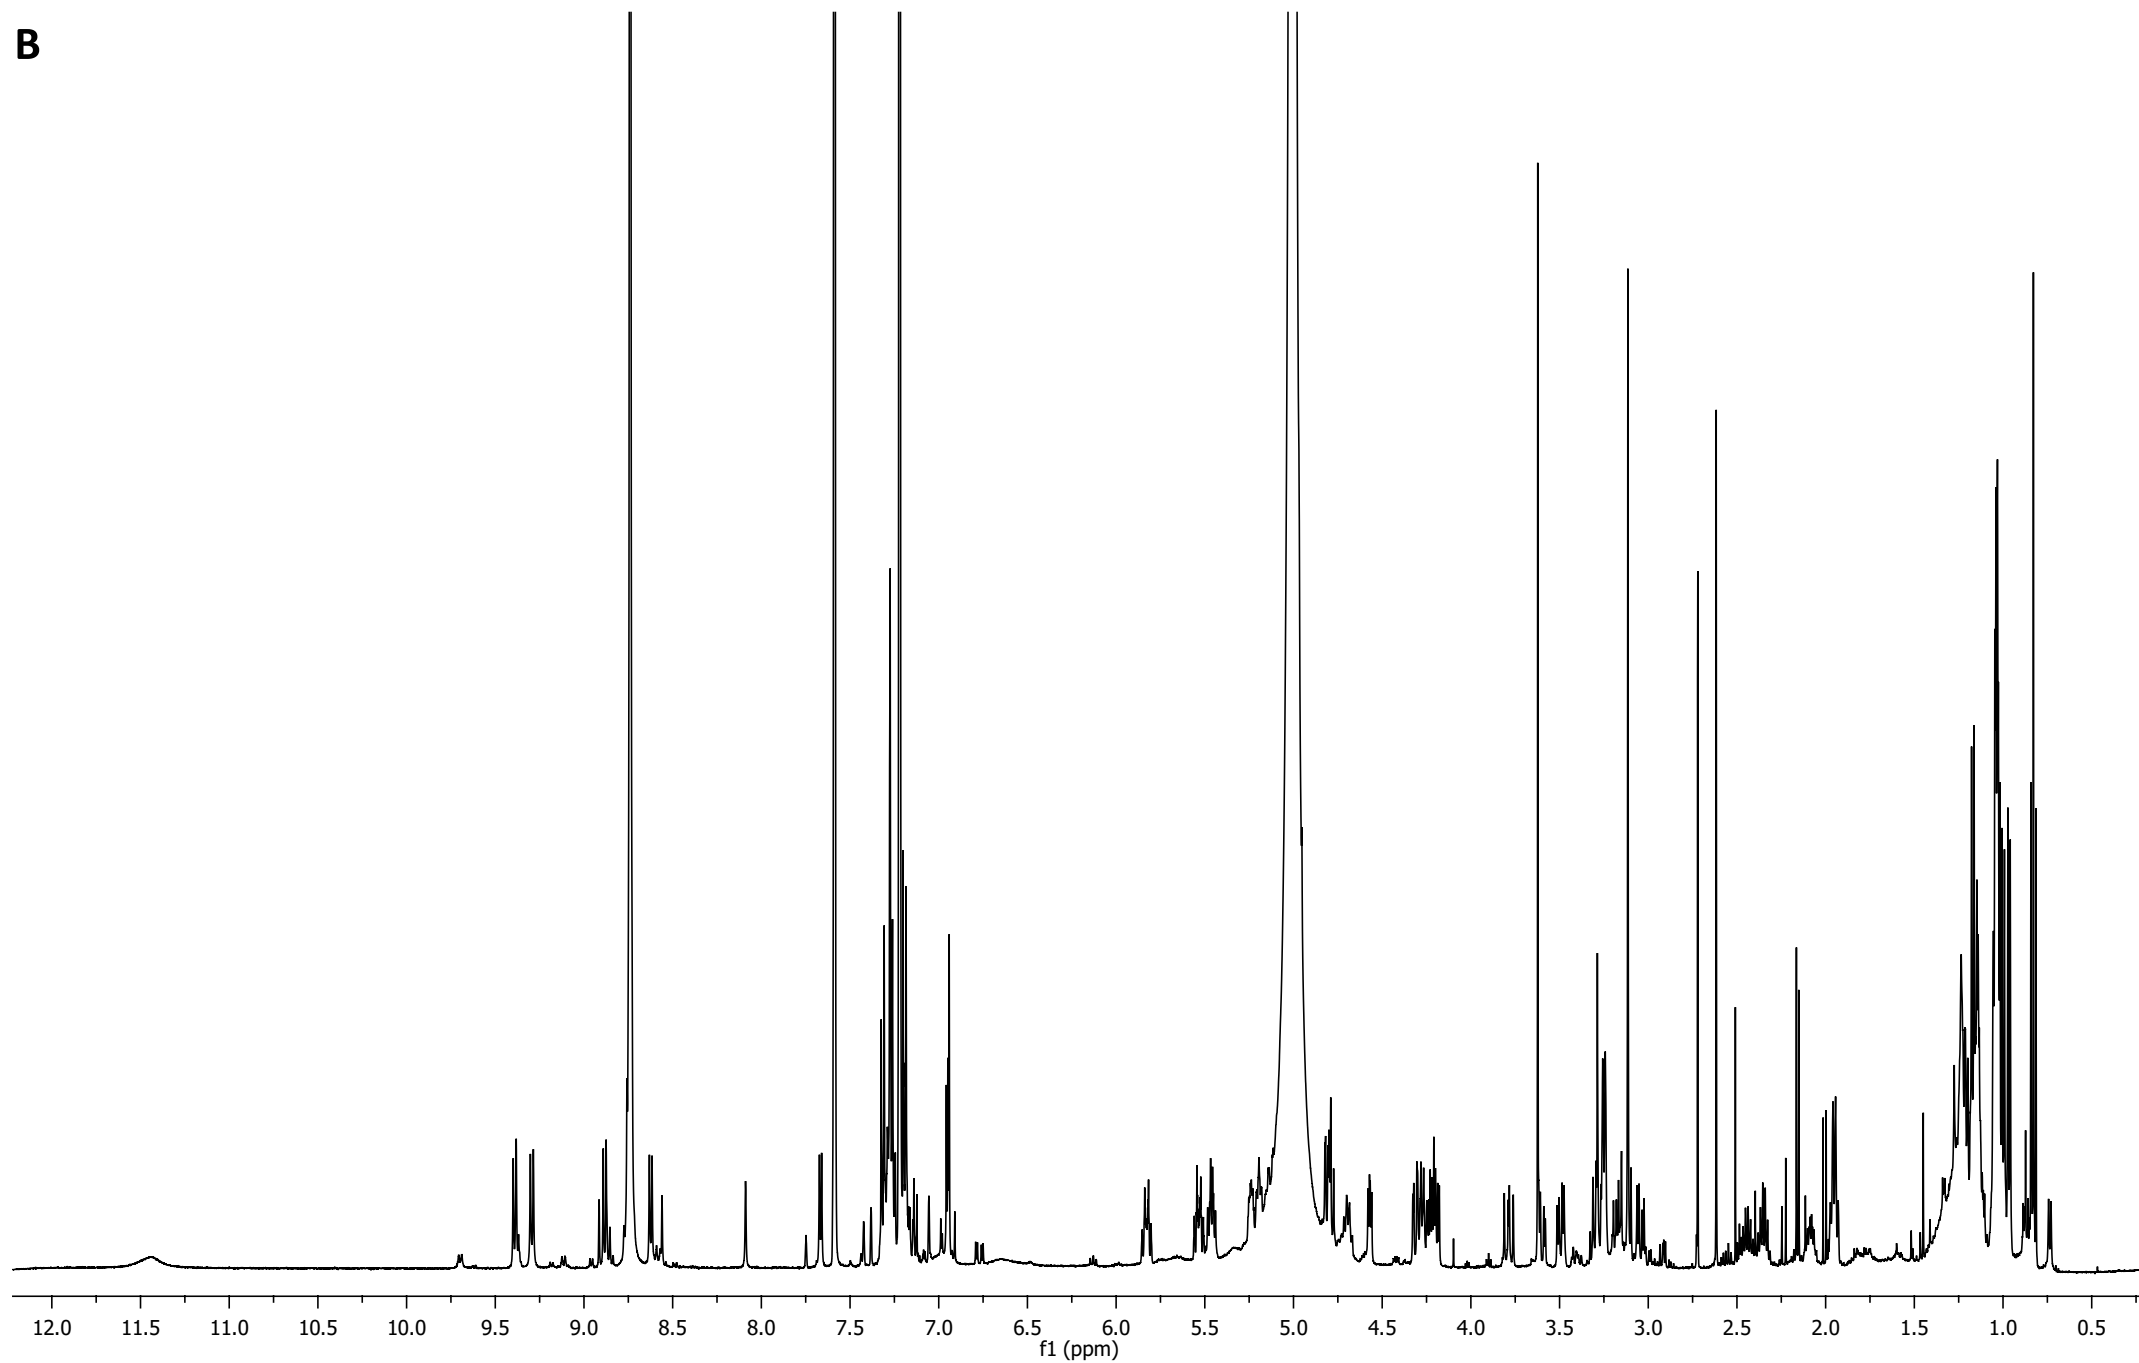

**Figure. S6. Characterization of thalassospiramide A5 (11).** (B)  $^1\text{H}$  spectrum in pyridine- $d_5$ .



C

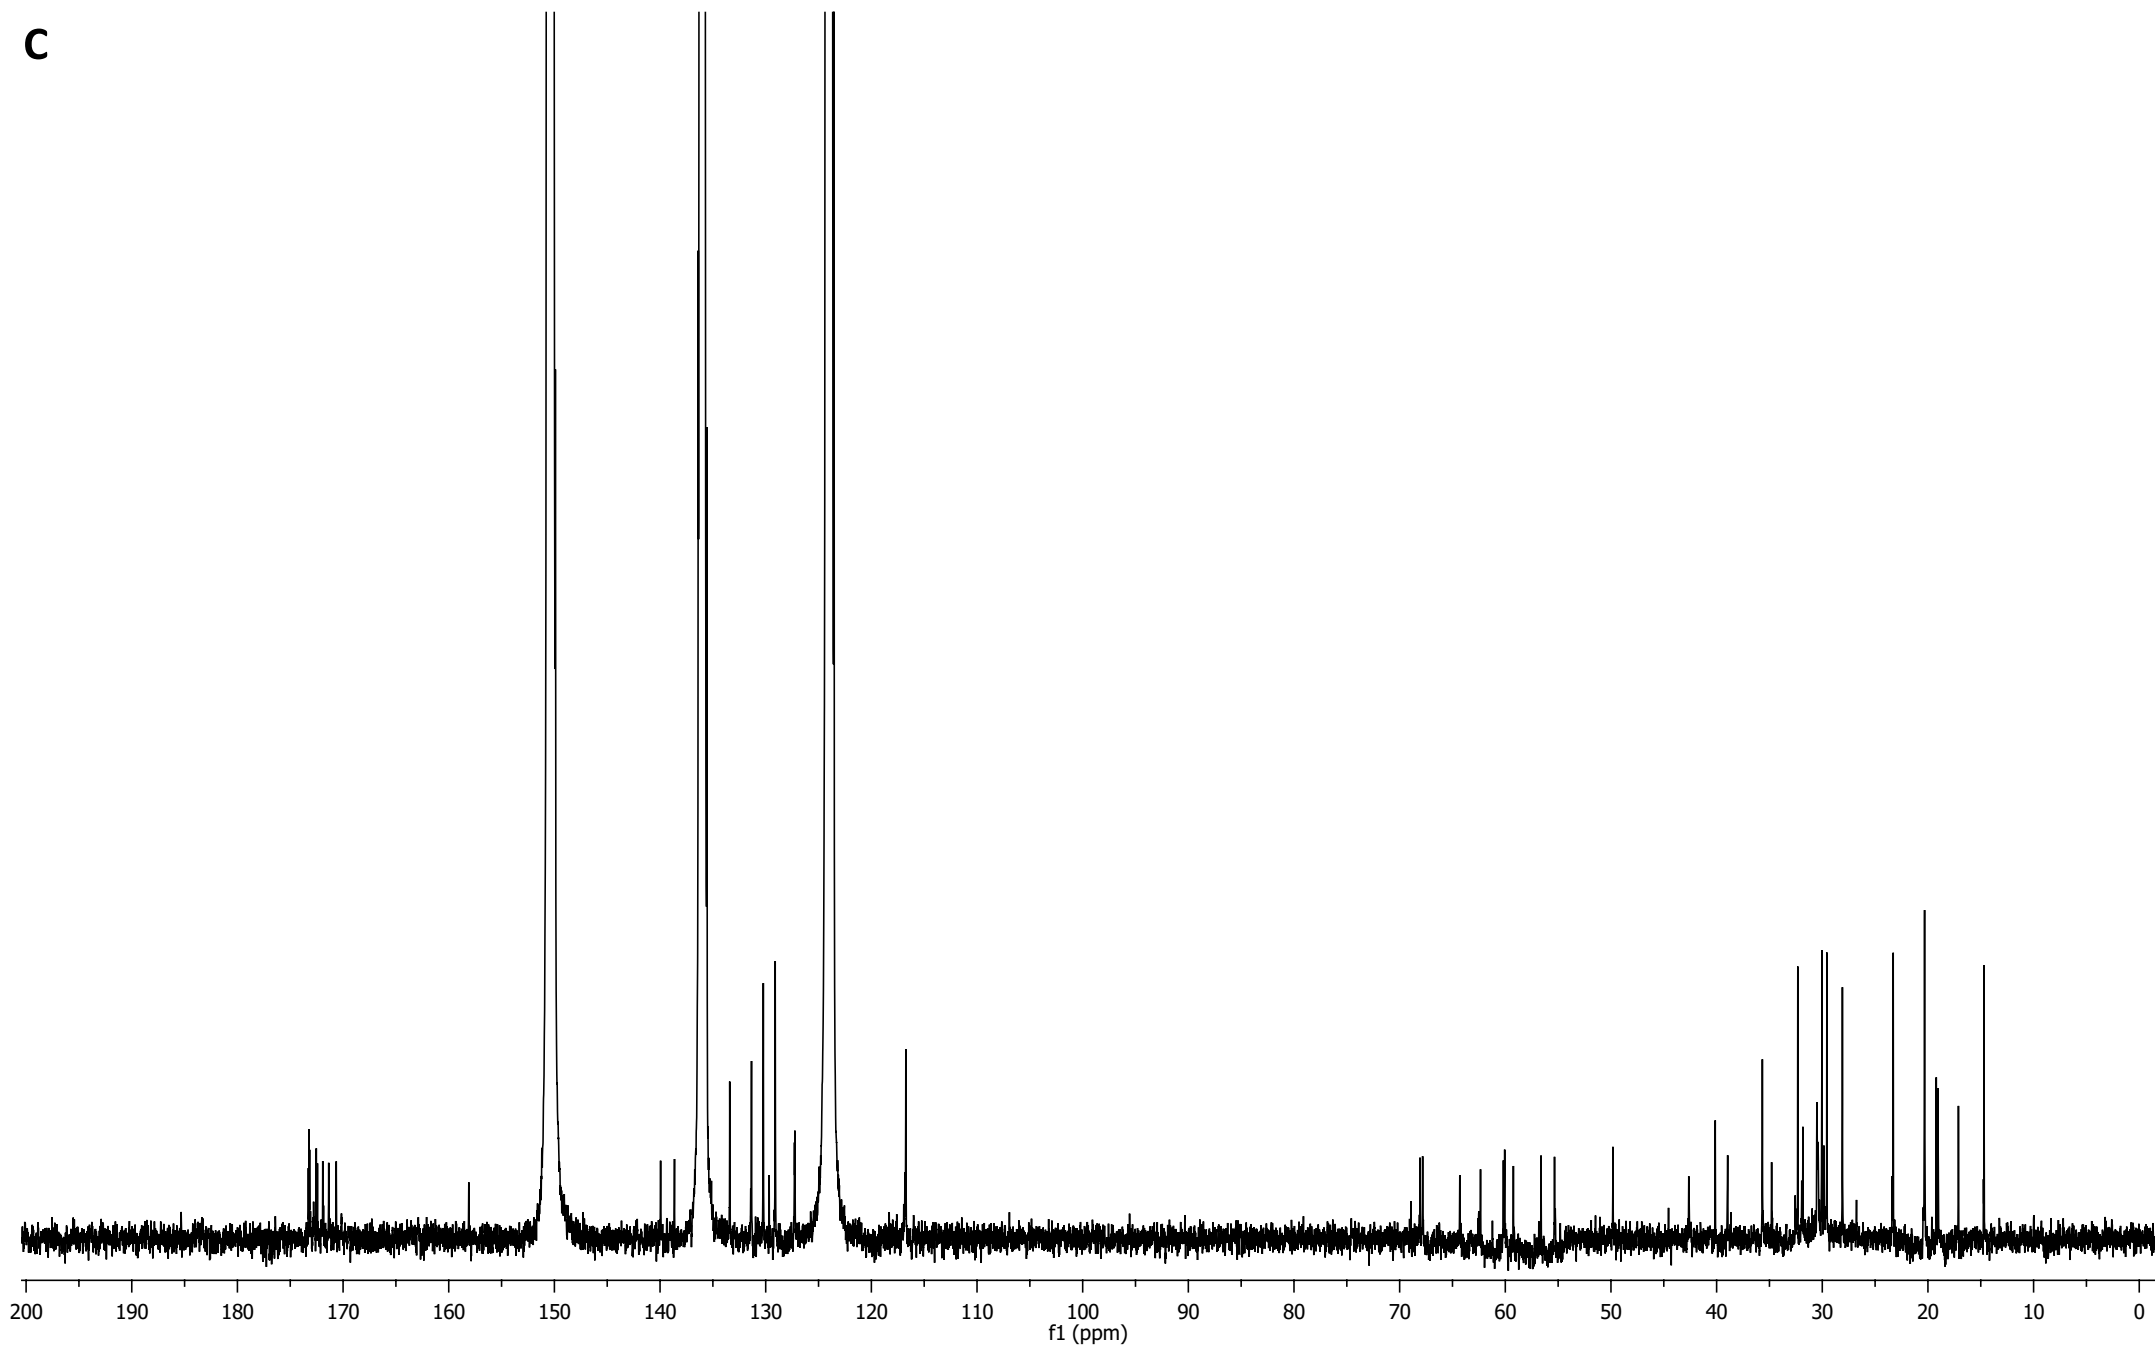

**Figure S6. Characterization of thallasspiramide A5 (11). (C)  $^{13}\text{C}$  spectrum in  $\text{pyridine-}d_5$ .**

**D**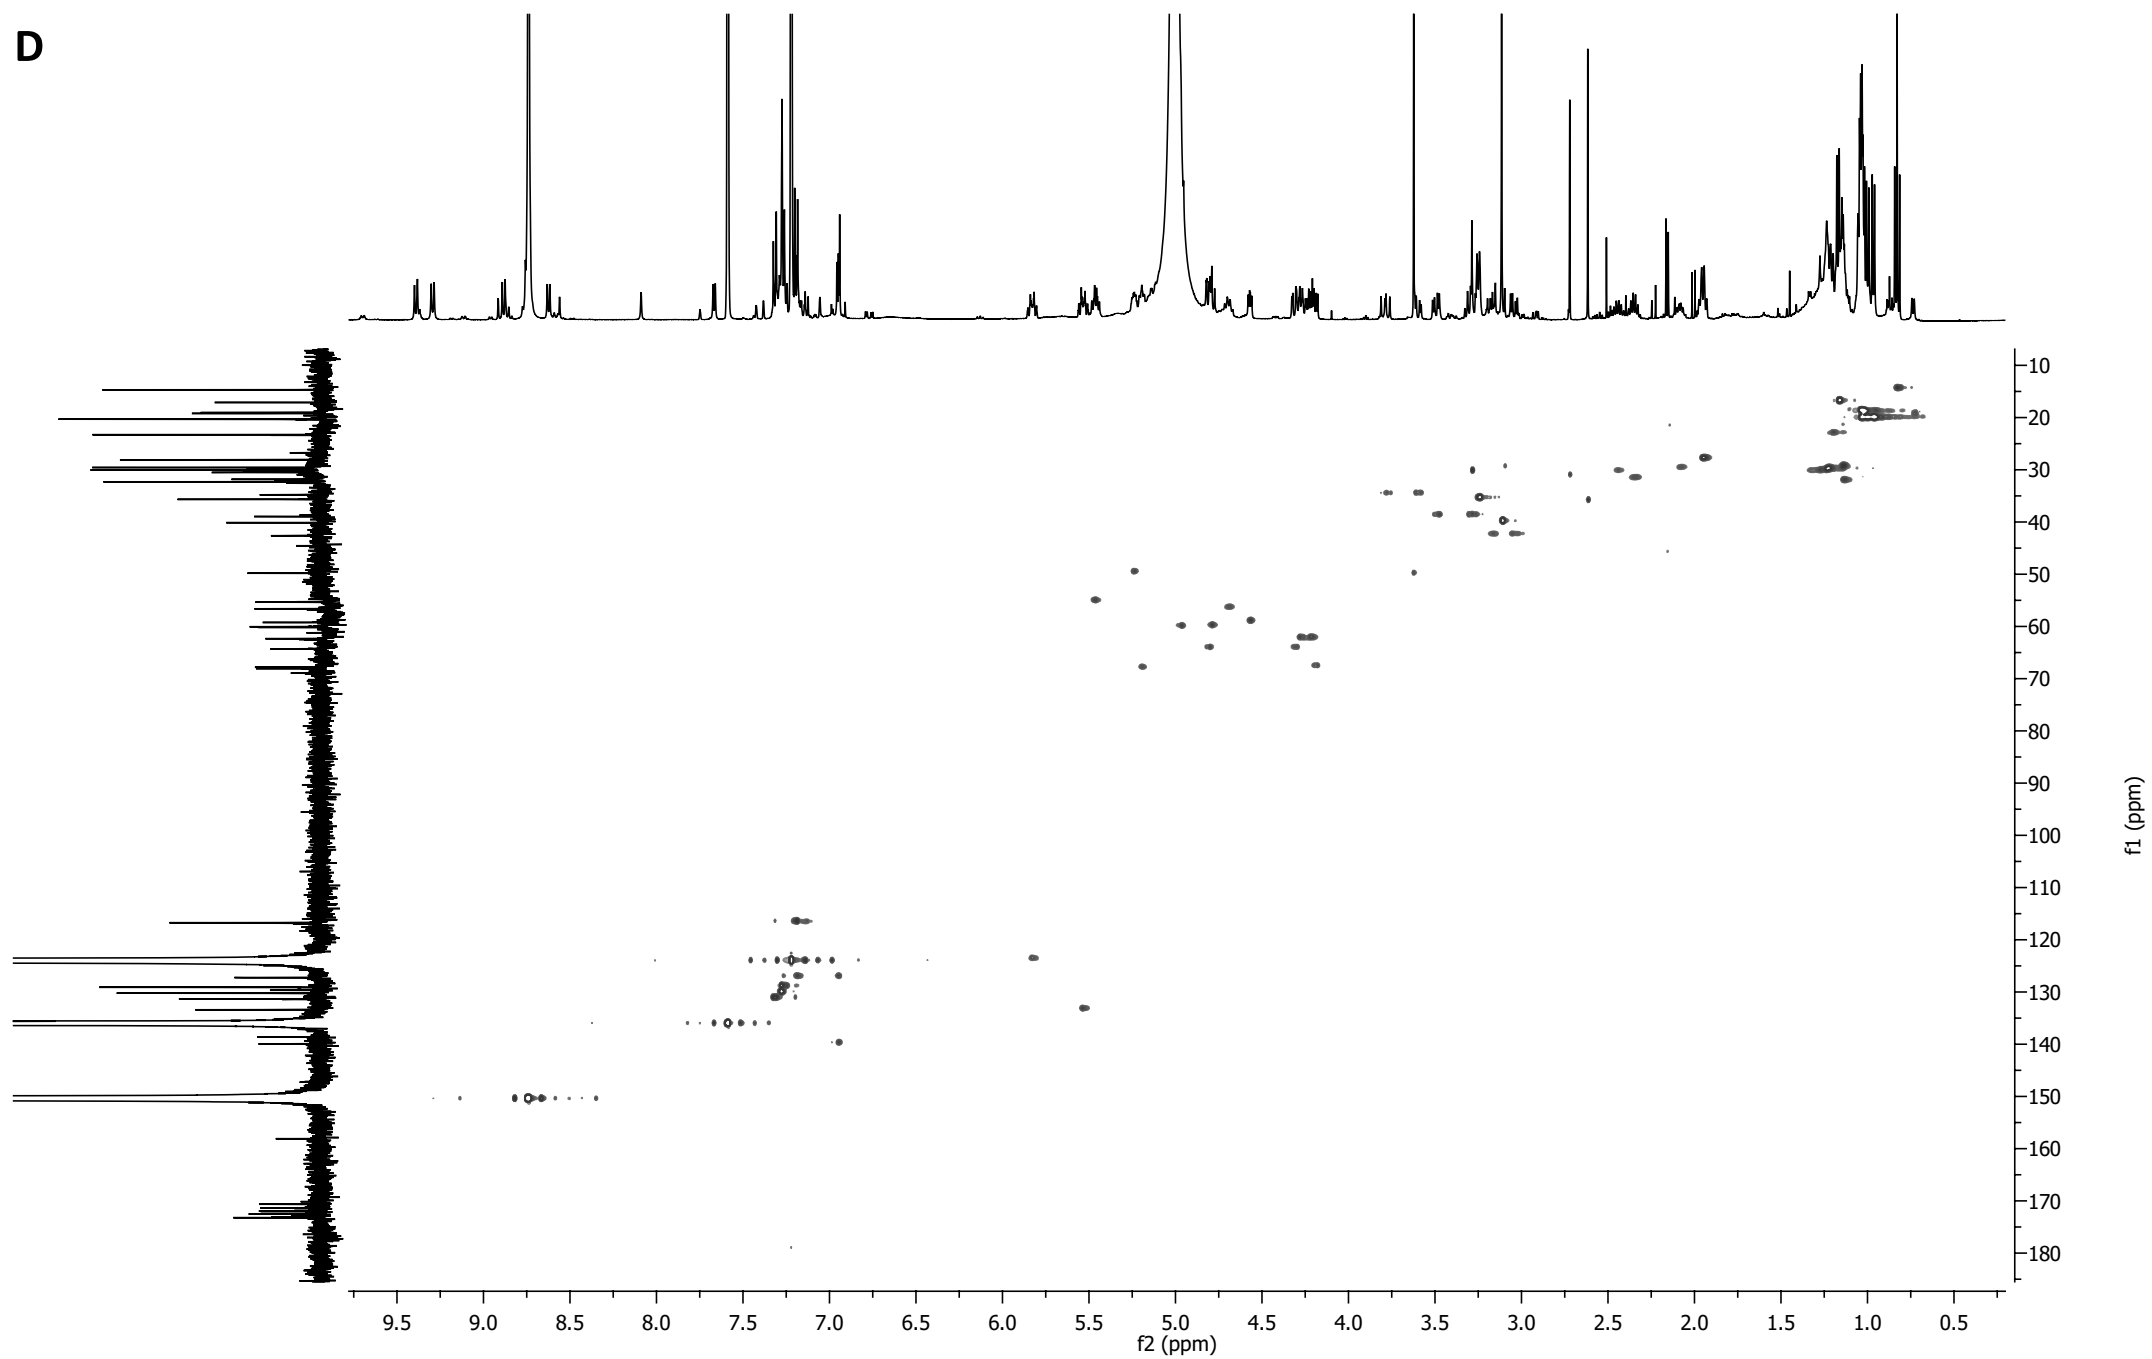

**Figure S6. Characterization of thalassospiramide A5 (11). (D) HSQC spectrum in pyridine- $d_5$ .**

**E**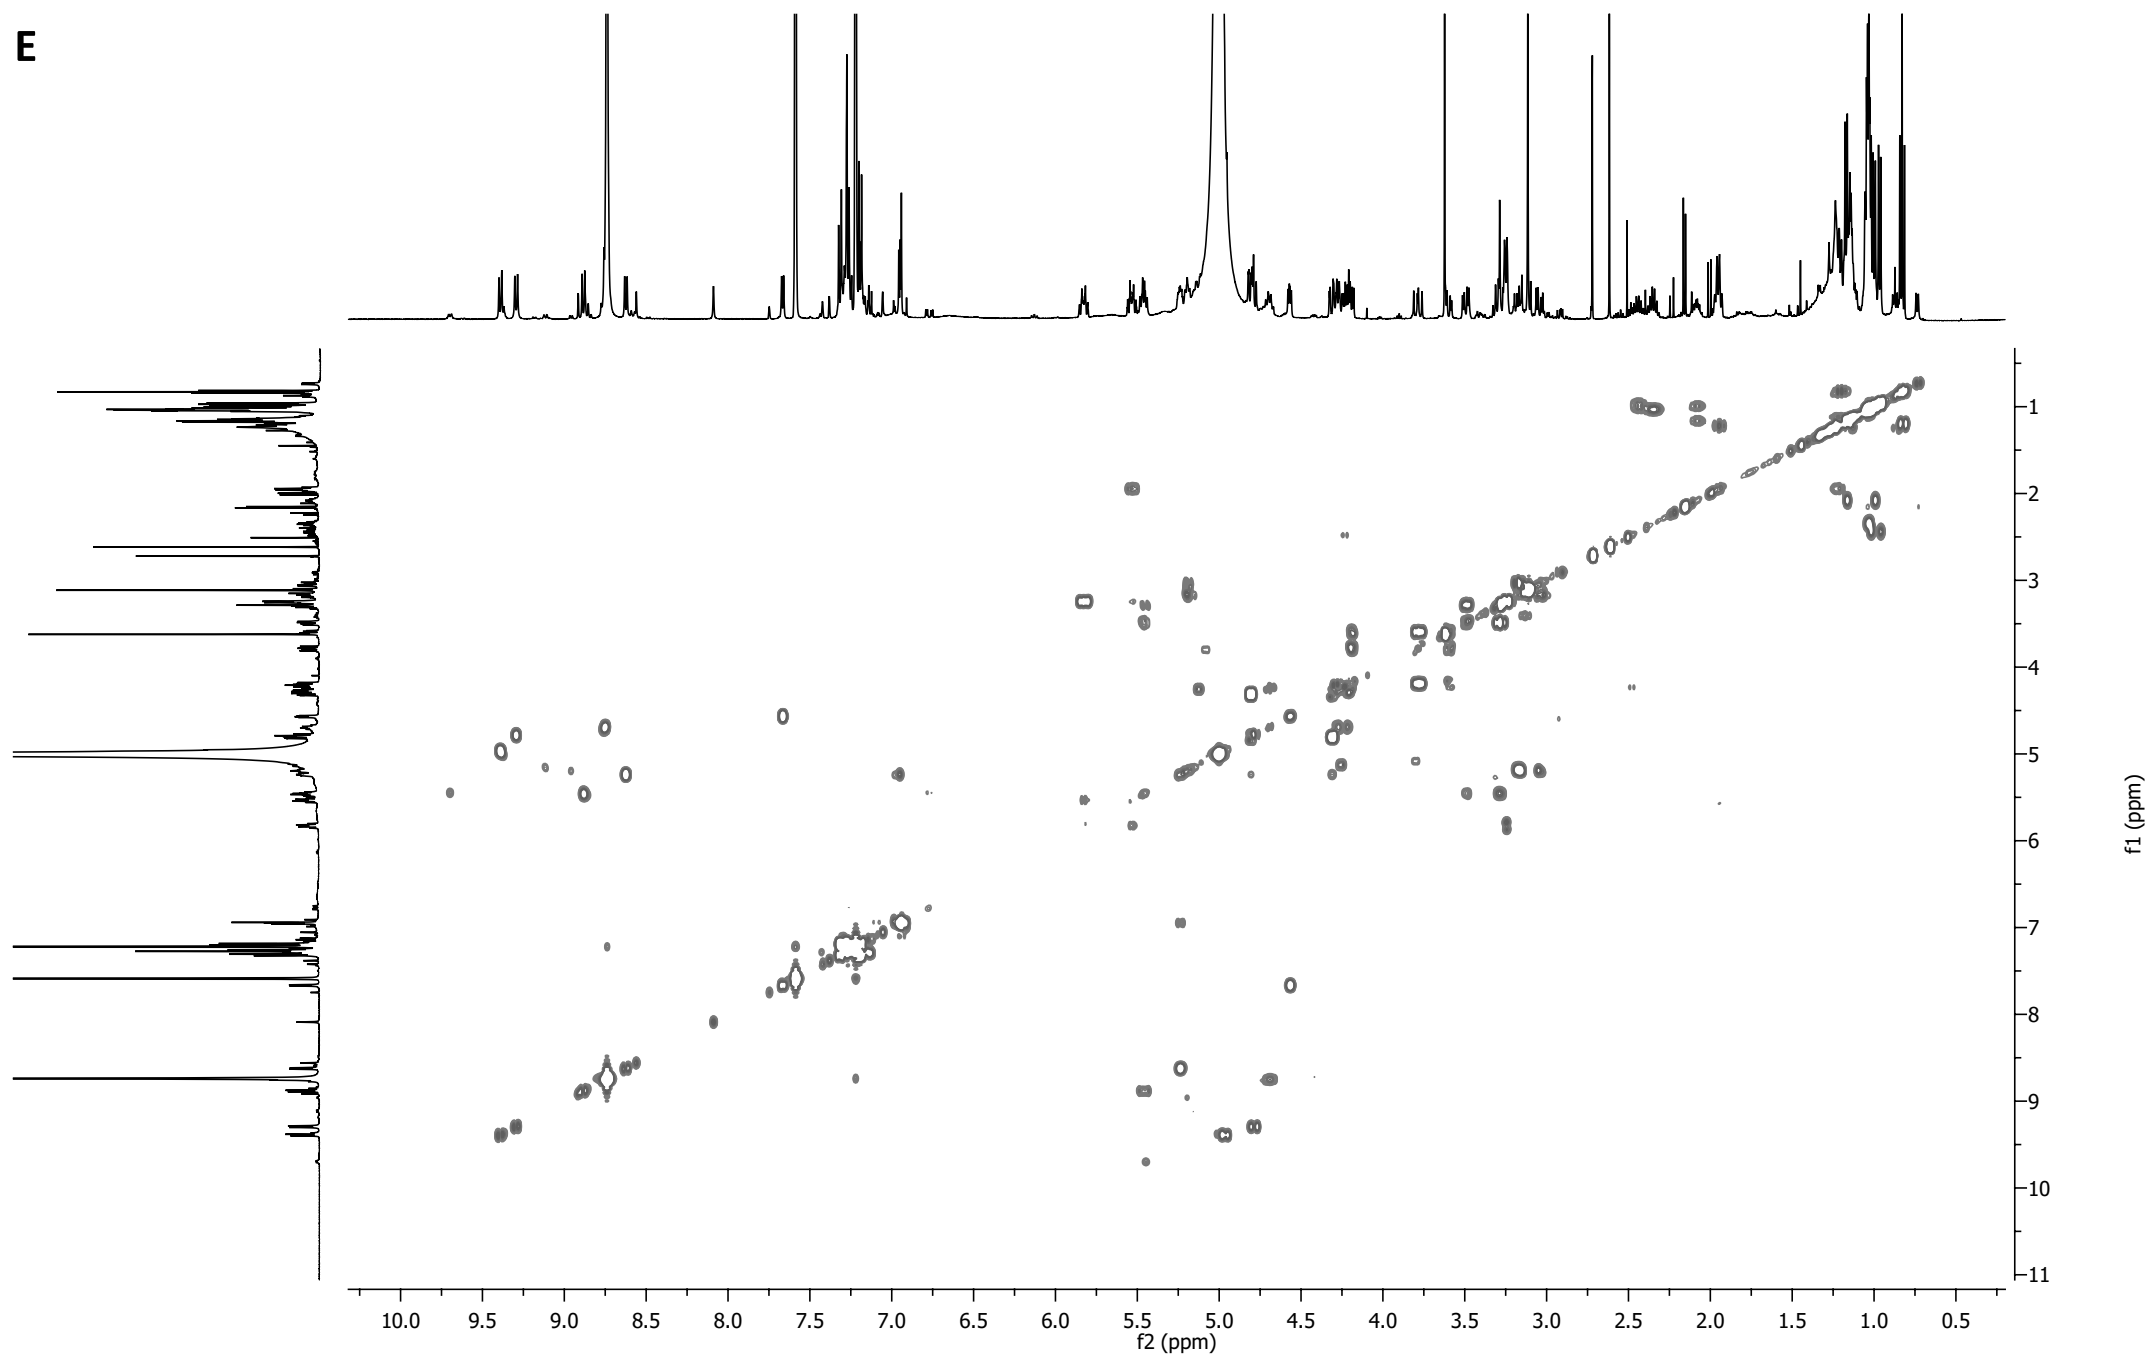

**Figure S6. Characterization of thalassospiramide A5 (11). (E)  $^1\text{H}$ - $^1\text{H}$  COSY spectrum in pyridine- $d_5$ .**

**F**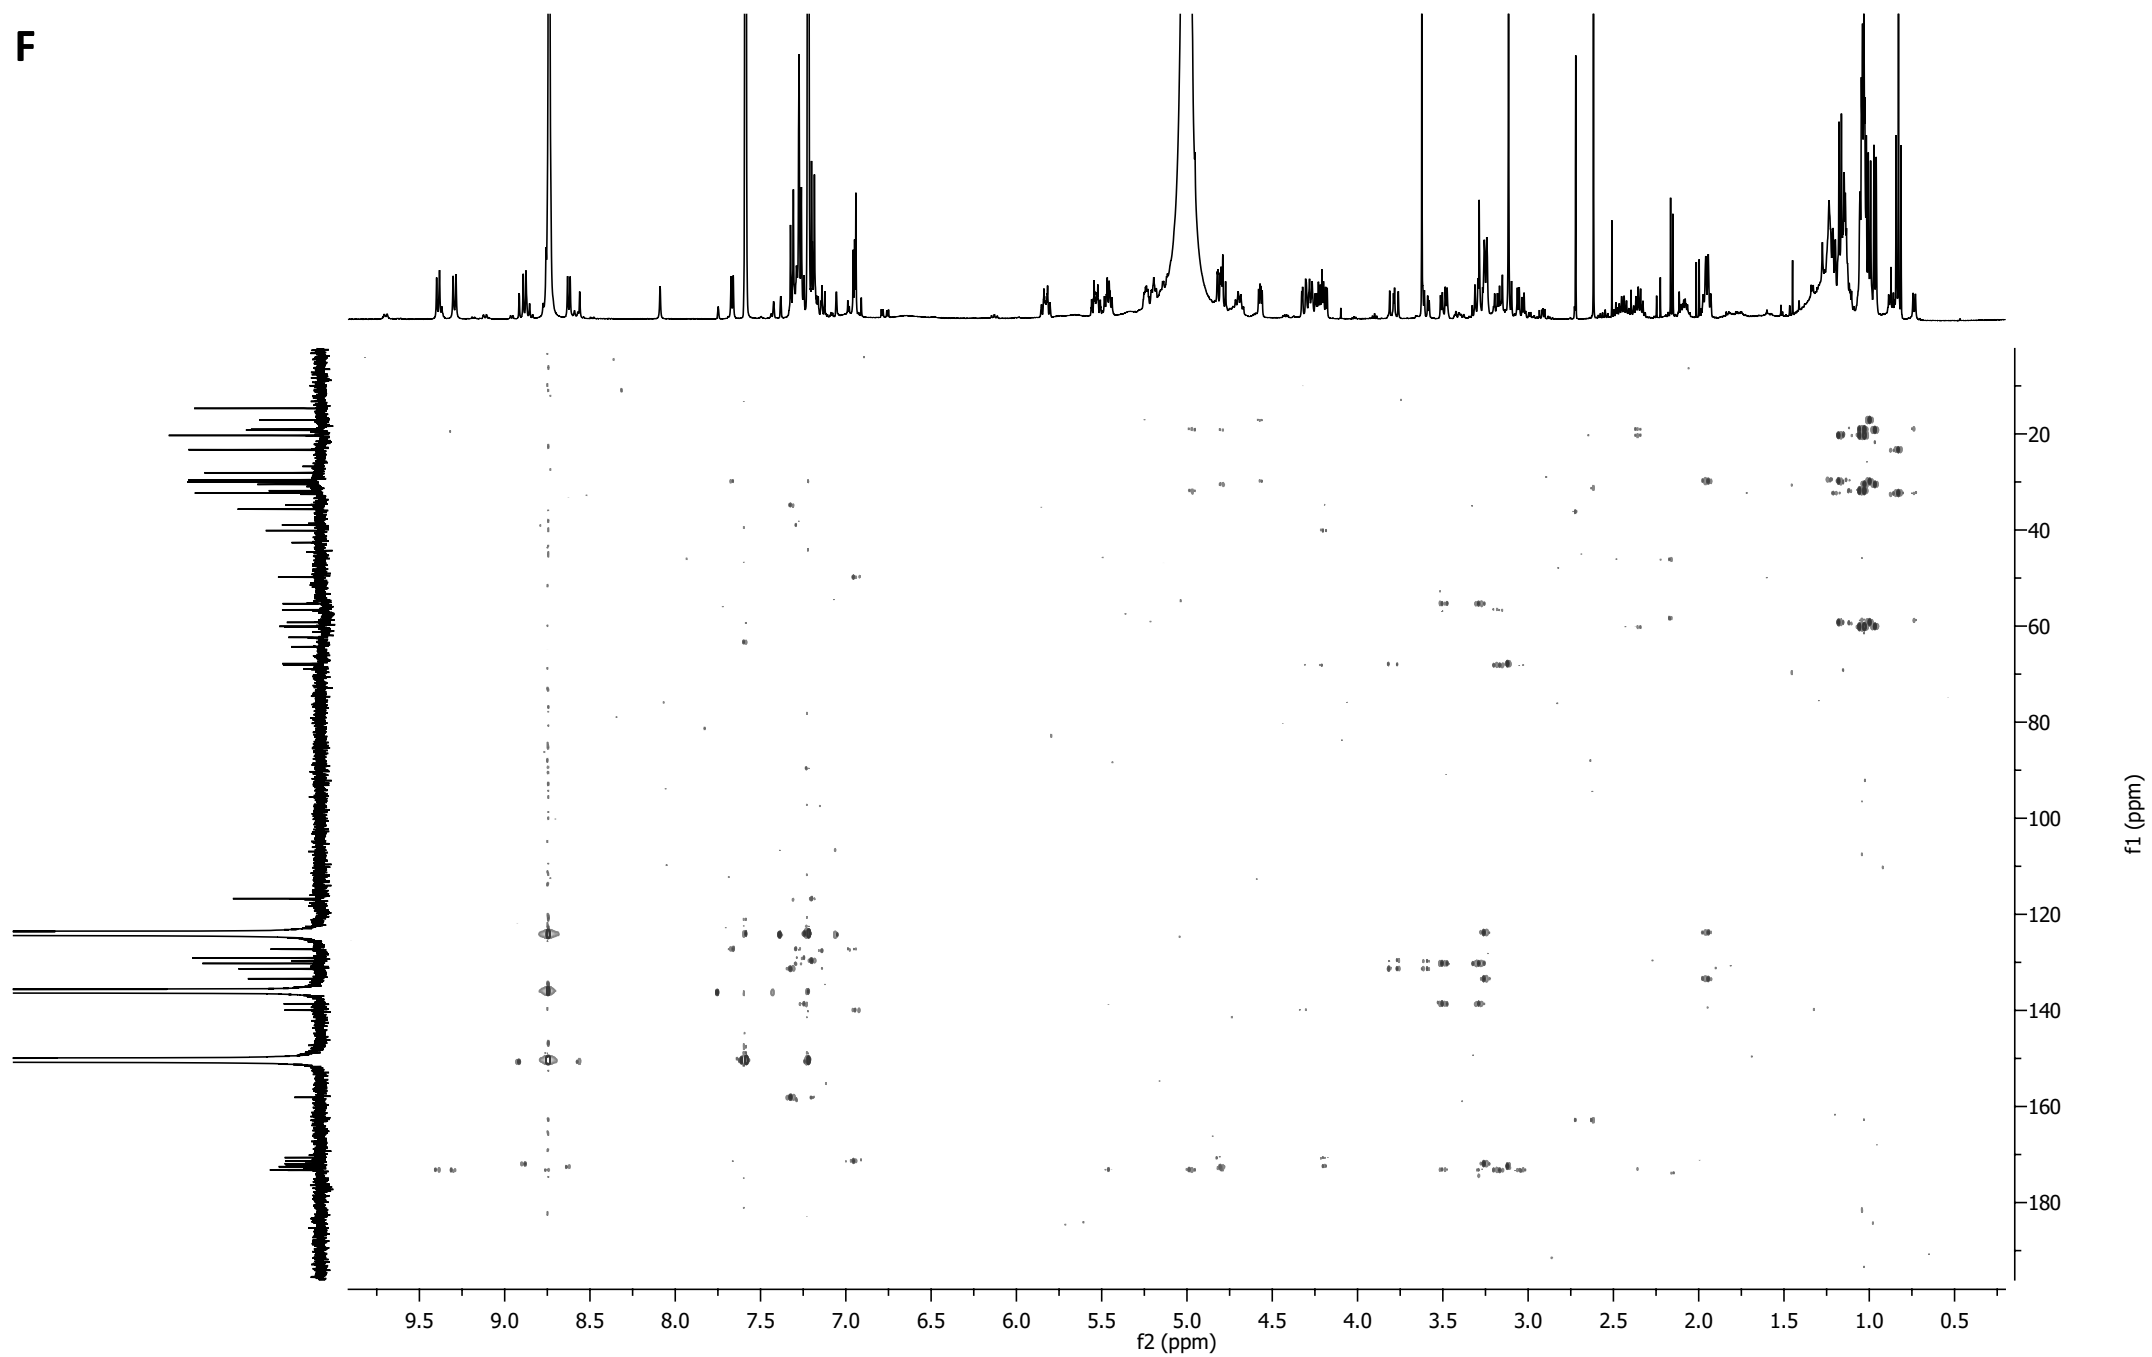

**Figure S6. Characterization of thallassopiramide A5 (11). (F) HMBC spectrum in pyridine- $d_5$ .**

**G**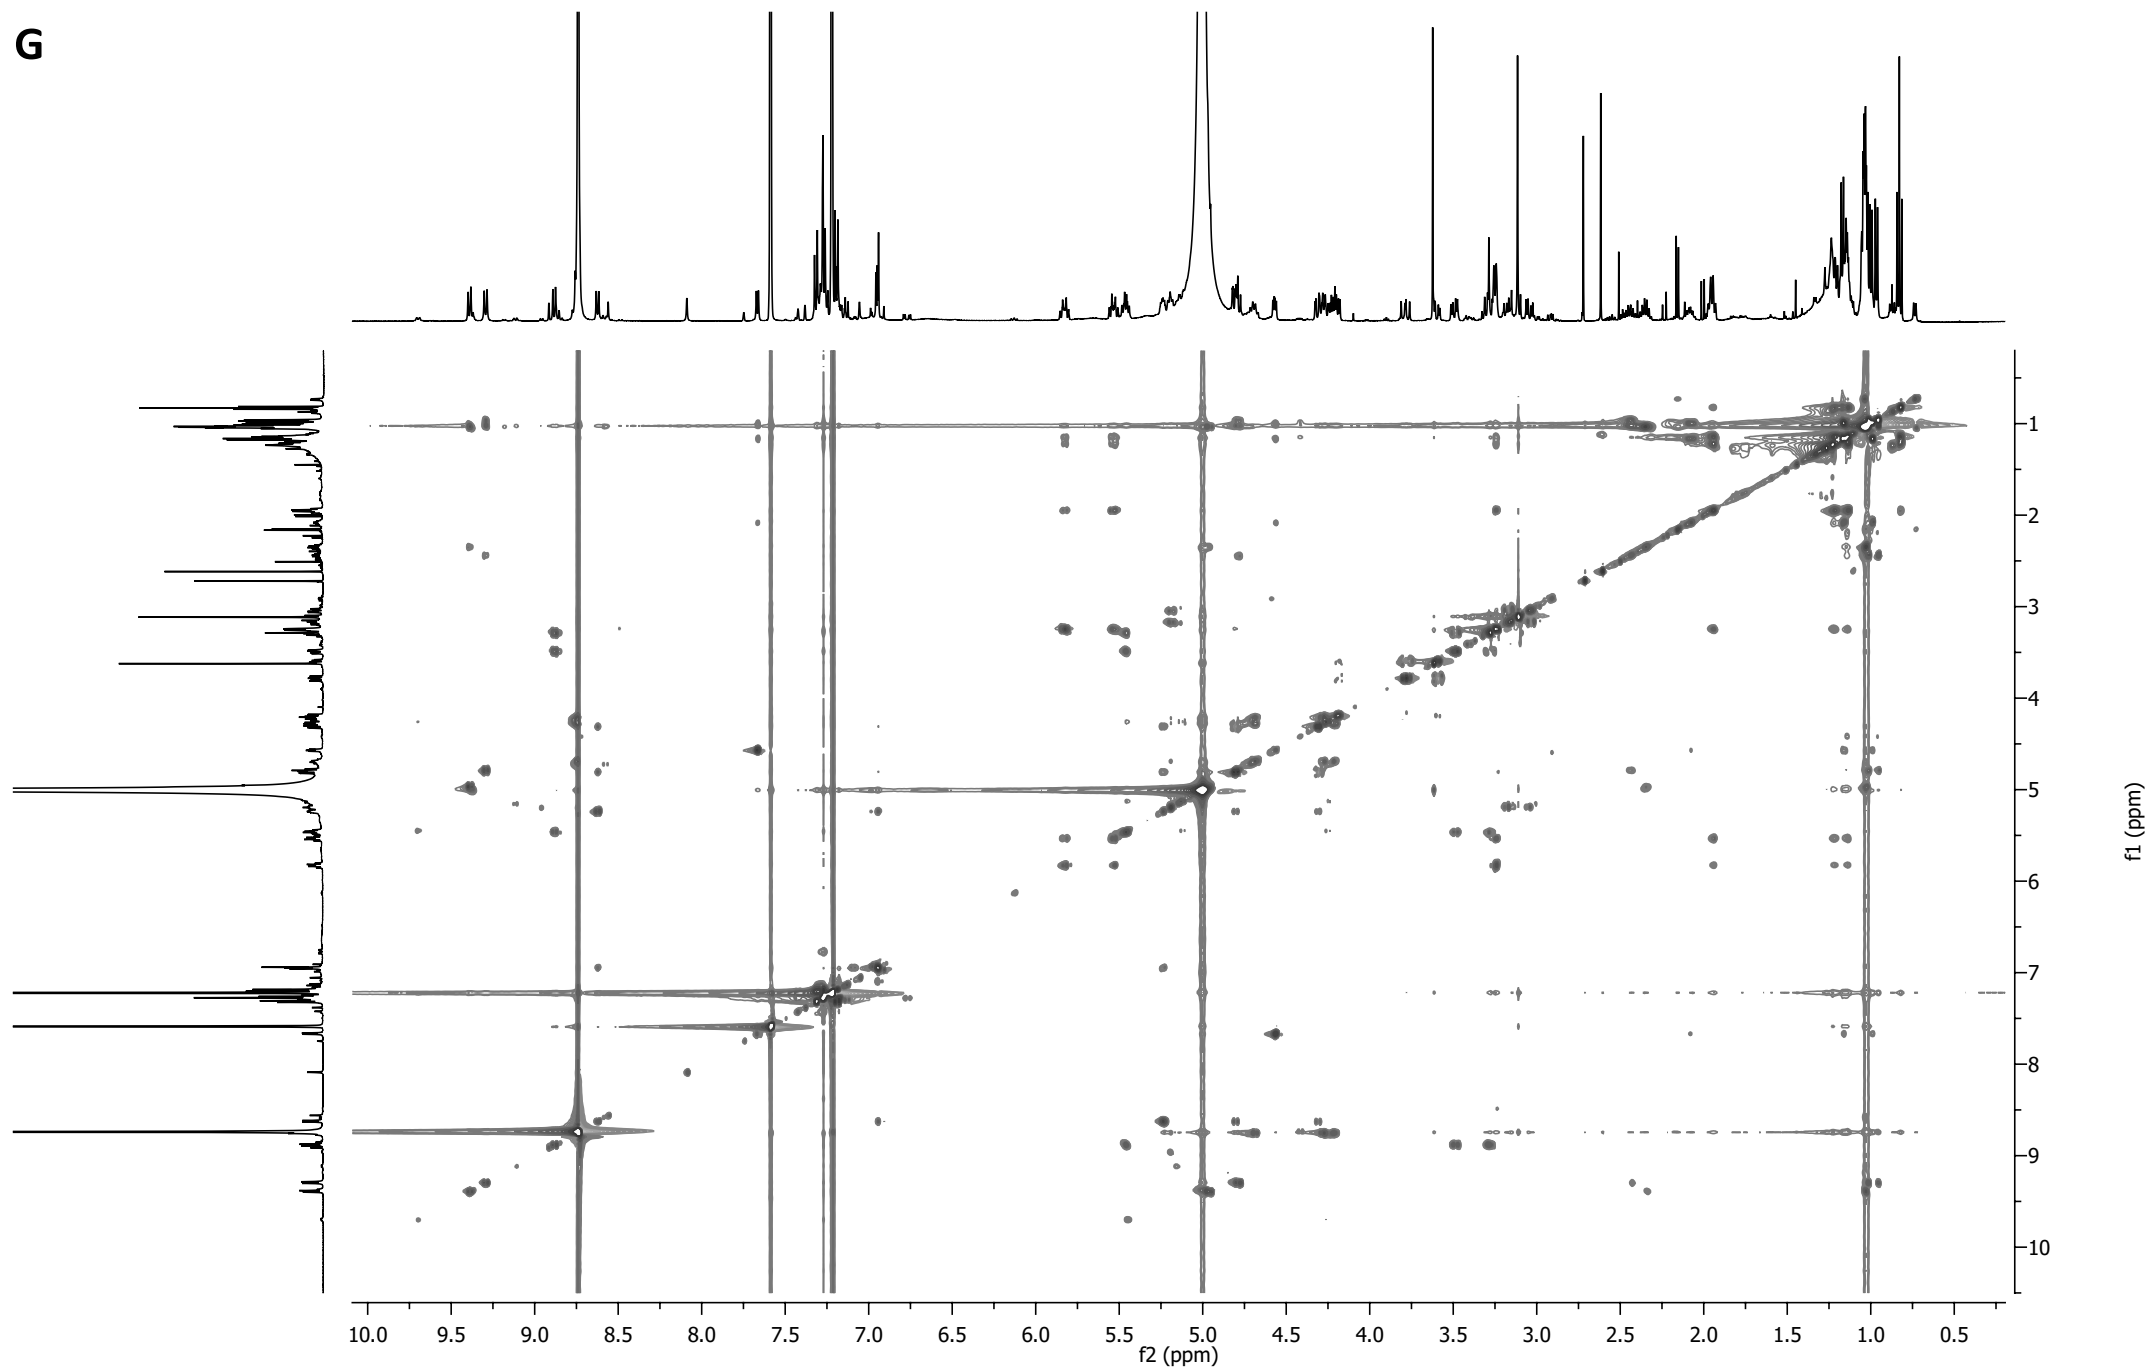

**Figure S6. Characterization of thalassospiramide A5 (11). (G)  $^1\text{H}$ - $^1\text{H}$  TOCSY spectrum in pyridine- $d_5$ .**

## H

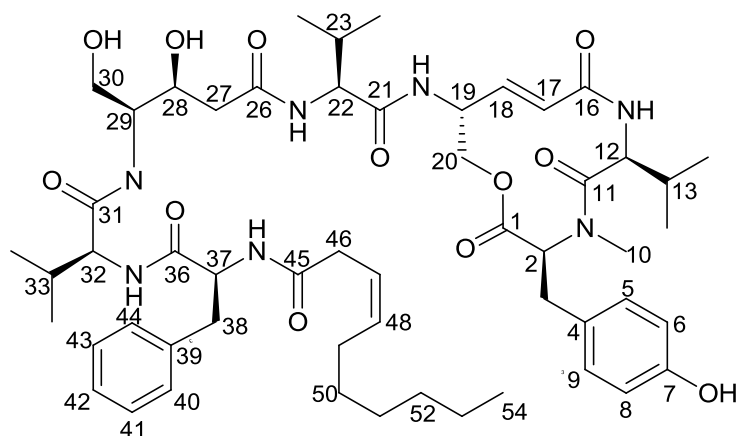NMR Spectral Data (500 MHz ( $^1\text{H}$ ), 125 MHz ( $^{13}\text{C}$ ) in pyridine- $d_5$ ) of thalassospiramide A5 (**11**)

| C/H   | $\delta_{\text{H}}$ | mult ( $J$ in Hz) | $\delta_{\text{C}}$ |                 | key HMBC |
|-------|---------------------|-------------------|---------------------|-----------------|----------|
| 1     |                     |                   |                     | C               |          |
| 2     |                     |                   |                     | CH              |          |
| 3a    | 3.60                | dd (14.2, 4.3)    | 34.8                | CH <sub>2</sub> |          |
| 3b    | 3.79                | dd (14.2, 11.0)   |                     |                 |          |
| 4     |                     |                   | 129.6               | C               |          |
| 5     | 7.31                | d (8.4)           | 131.4               | CH              |          |
| 6     | 7.19                | d (8.4)           | 116.8               | CH              |          |
| 7     |                     |                   | 158.1               | C               |          |
| 7-OH  |                     |                   |                     |                 |          |
| 8     | 7.19                | d (8.4)           | 116.8               | CH              |          |
| 9     | 7.31                | d (8.4)           | 131.4               | CH              |          |
| 10    | 3.12                | s                 | 40.1                | CH <sub>3</sub> | 2, 11    |
| 11    |                     |                   | 172.4               | C               |          |
| 12    | 4.57                | dd (6.2, 4.2)     | 59.2                | CH              |          |
| 12-NH | 7.67                | dd (6.2)          |                     |                 | 16       |
| 13    | 2.09                | m                 | 29.6                | CH              |          |
| 14    | 1.00                | dd (6.9)          | 20.3                | CH <sub>3</sub> |          |
| 15    | 1.17                | dd (6.9)          | 17.1                | CH <sub>3</sub> |          |
| 16    |                     |                   | 171.4               | C               |          |
| 17    | 6.93                | d (15.8)          | 127.2               | CH              | 16       |
| 18    | 6.97                | d (15.8, 4.3))    | 140.0               | CH              |          |
| 19    | 5.24                | m                 | 49.8                | CH              |          |
| 19-NH | 8.62                | d (7.5)           |                     |                 | 21       |
| 20a   | 4.31                | m                 | 64.3                | CH <sub>2</sub> |          |
| 20b   | 4.82                | m                 |                     |                 |          |
| 21    |                     |                   | 172.5               | C               |          |
| 22    | 4.79                | m                 | 60.1                | CH              |          |
| 22-NH | 9.30                |                   |                     |                 | 26       |
| 23    | 2.44                | m                 | 30.0                | CH              |          |
| 24    | 0.97                | d (6.7)           | 20.3                | CH <sub>3</sub> |          |
| 25    | 1.02                | m                 | 19.2                | CH <sub>3</sub> |          |
| 26    |                     |                   | 173.3               | C               |          |
| 27a   | 3.17                | dd (14.2, 8.3)    | 42.6                | CH <sub>2</sub> | 26       |
| 27b   | 3.04                | dd (14.2, 5.5)    |                     |                 |          |
| 28    | 5.19                | m                 | 68.1                | CH              |          |
| 28-OH |                     |                   |                     |                 |          |

|       |      |                     |       |                 |    |
|-------|------|---------------------|-------|-----------------|----|
| 29    | 4.69 | m                   | 56.6  | CH              |    |
| 29-NH | 8.74 | m                   |       |                 | 31 |
| 30a   | 4.22 | m                   | 62.4  | CH <sub>2</sub> |    |
| 30b   | 4.28 | m                   |       |                 |    |
| 30-OH |      |                     |       |                 |    |
| 31    |      |                     | 173.2 | C               |    |
| 32    | 4.98 | m                   | 60.2  | CH              | 31 |
| 32-NH | 9.39 | d (8.5)             |       |                 | 36 |
| 33    | 2.35 | m                   | 31.8  | CH              |    |
| 34    | 1.04 | m                   | 20.3  | CH <sub>3</sub> |    |
| 35    | 1.05 | m                   | 19.1  | CH <sub>3</sub> |    |
| 36    |      |                     | 173.2 | C               |    |
| 37    | 5.46 |                     | 55.3  | CH              |    |
| 37-NH | 8.89 |                     |       |                 | 45 |
| 38a   | 3.31 | dd (14.0, 5.9)      | 39.0  | CH <sub>2</sub> |    |
| 38b   | 3.49 | dd (14.0, 5.4)      |       |                 |    |
| 39    |      |                     | 138.6 | C               |    |
| 40    | 7.28 | m                   | 130.2 | CH              |    |
| 41    | 7.27 | m                   | 129.1 | CH              |    |
| 42    | 7.25 | m                   | 129.1 | CH              |    |
| 43    | 7.27 | m                   | 129.1 | CH              |    |
| 44    | 7.28 | m                   | 130.2 | CH              |    |
| 45    |      |                     | 171.9 | C               |    |
| 46    | 3.25 | d (7.2)             | 35.7  | CH <sub>2</sub> | 45 |
| 47    | 5.83 | dt (10.5, 7.2, 1.0) | 133.4 | CH              |    |
| 48    | 5.53 | dt (10.5, 7.2, 1.5) | 123.9 | CH              |    |
| 49    | 1.95 | m                   | 28.1  | CH <sub>2</sub> |    |
| 50    | 1.22 | m                   | 29.9  | CH <sub>2</sub> |    |
| 51    | 1.26 | m                   | 30.5  | CH <sub>2</sub> |    |
| 52    | 1.13 | m                   | 32.3  | CH <sub>2</sub> |    |
| 53    | 1.20 | m                   | 23.3  | CH <sub>2</sub> |    |
| 54    | 0.83 | t (7.0)             | 14.7  | CH <sub>3</sub> |    |

**Figure S6. Characterization of thalassospiramide A5 (11). (H) NMR assignment.**

# A ESI-TOF-HRMS

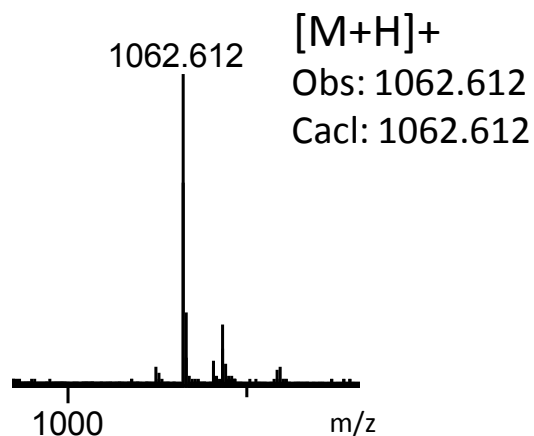

ITMS<sup>2</sup> – 1062 m/z (1+)

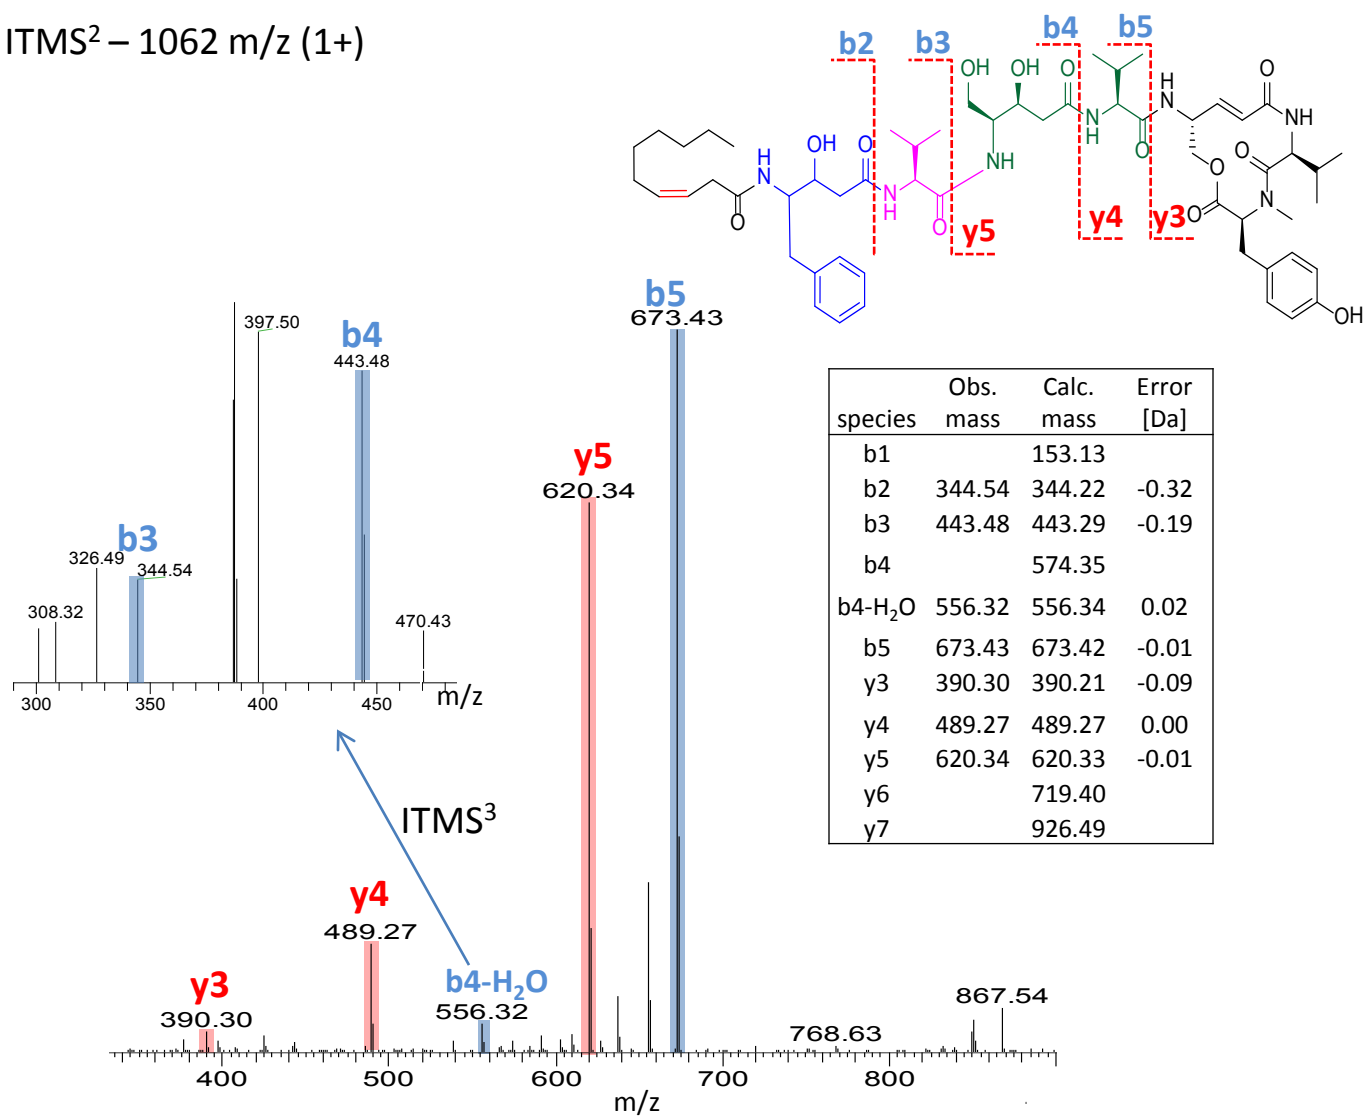

Figure S7. Characterization of thalassospiramide B (2). (A) MS<sup>n</sup> analysis.



**B**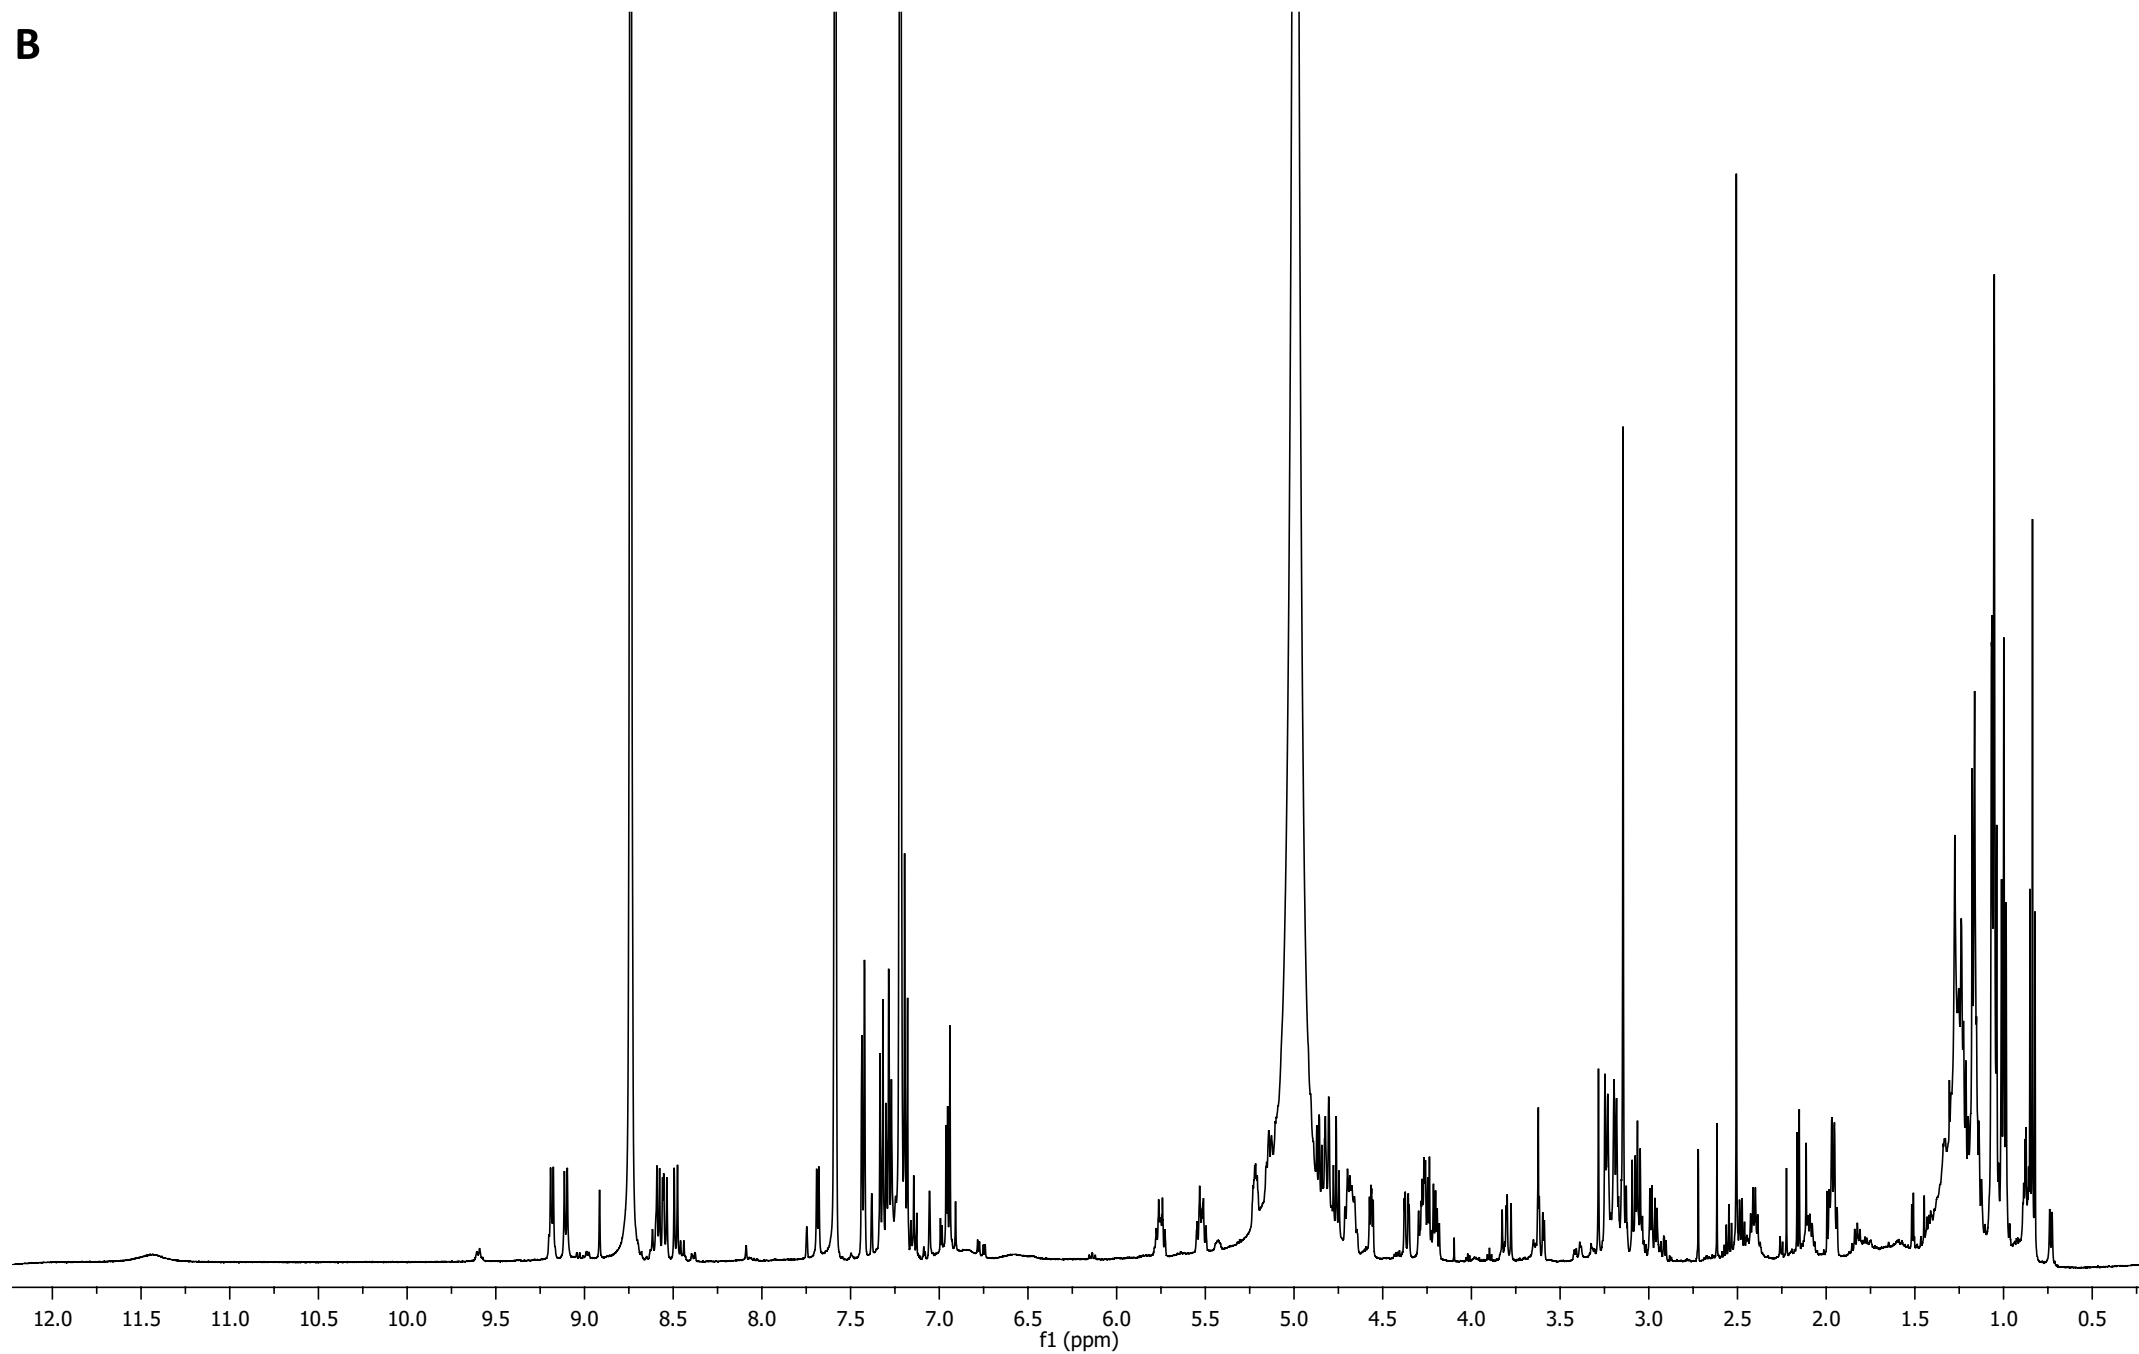

**Figure S7. Characterization of thalassospiramide B (2).** (B)  $^1\text{H}$  spectrum in  $\text{pyridine-}d_5$ .

# A ESI-TOF-HRMS

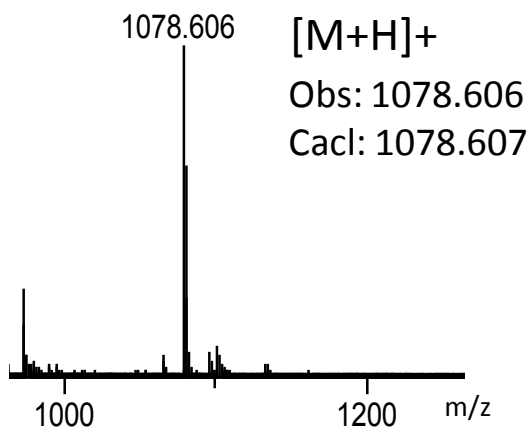

## ITMS<sup>2</sup> – 1078 m/z (1+)

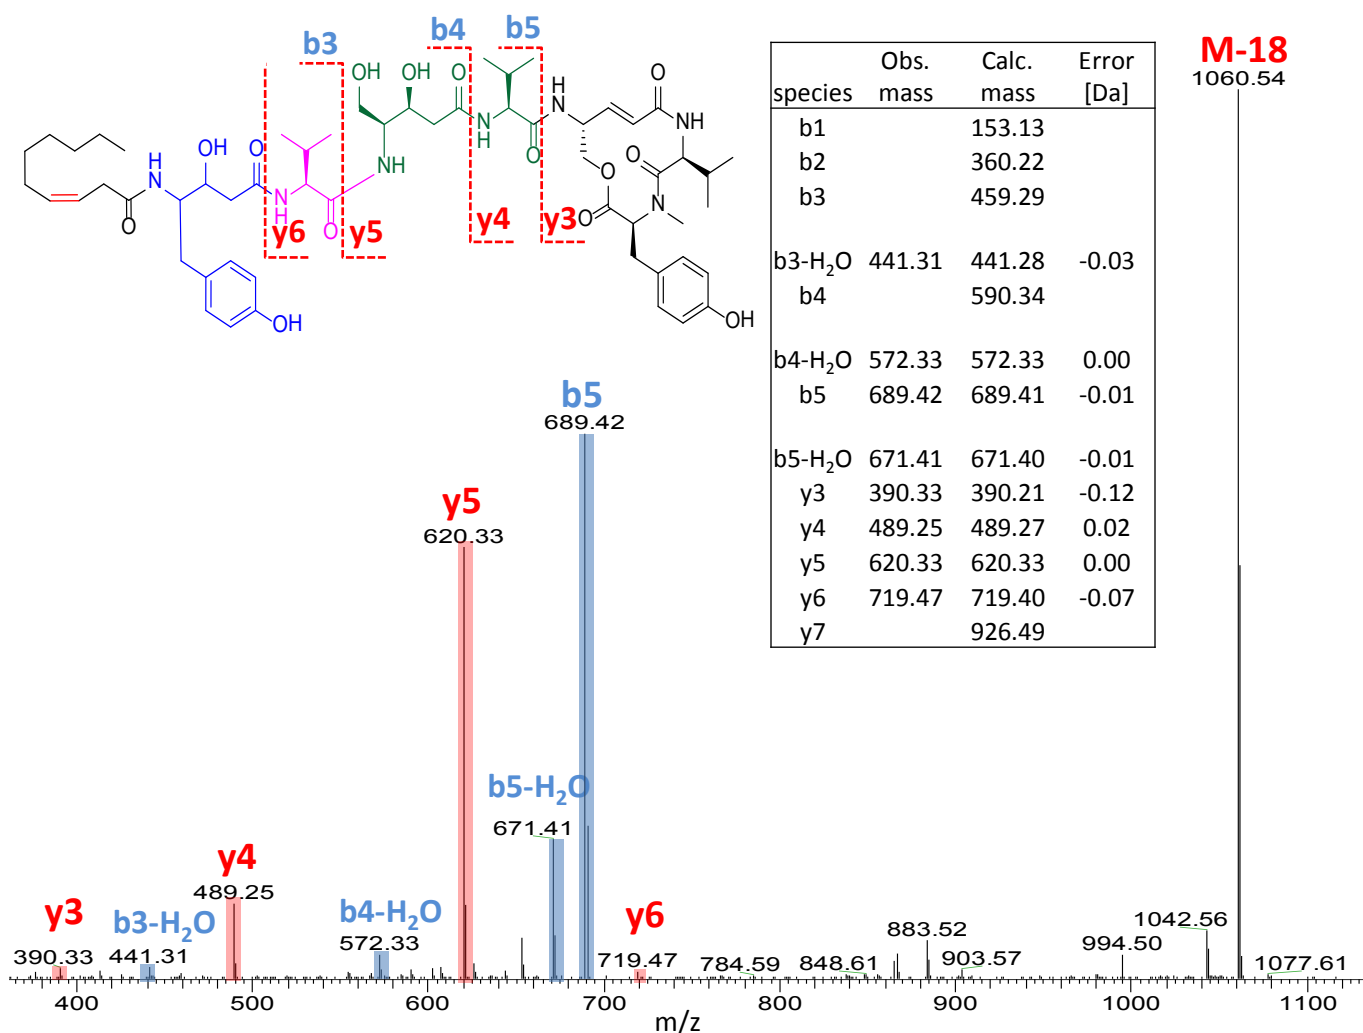

Figure S8. Characterization of thalassospiramide B1 (12). (A) MS<sup>n</sup> analysis.

# A ESI-TOF-HRMS

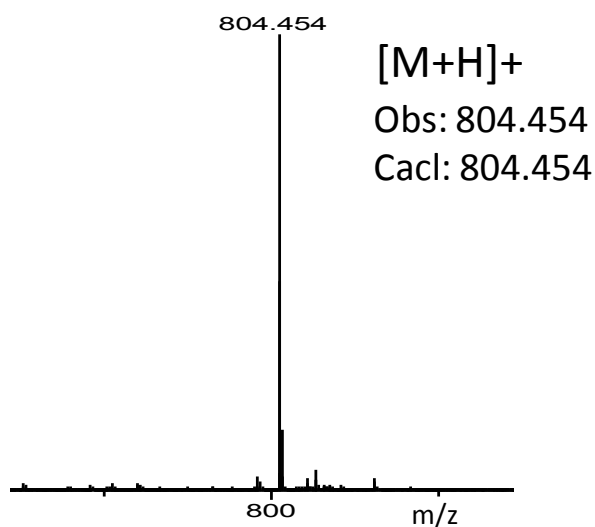

## ITMS<sup>2</sup> – 804 m/z (1+)

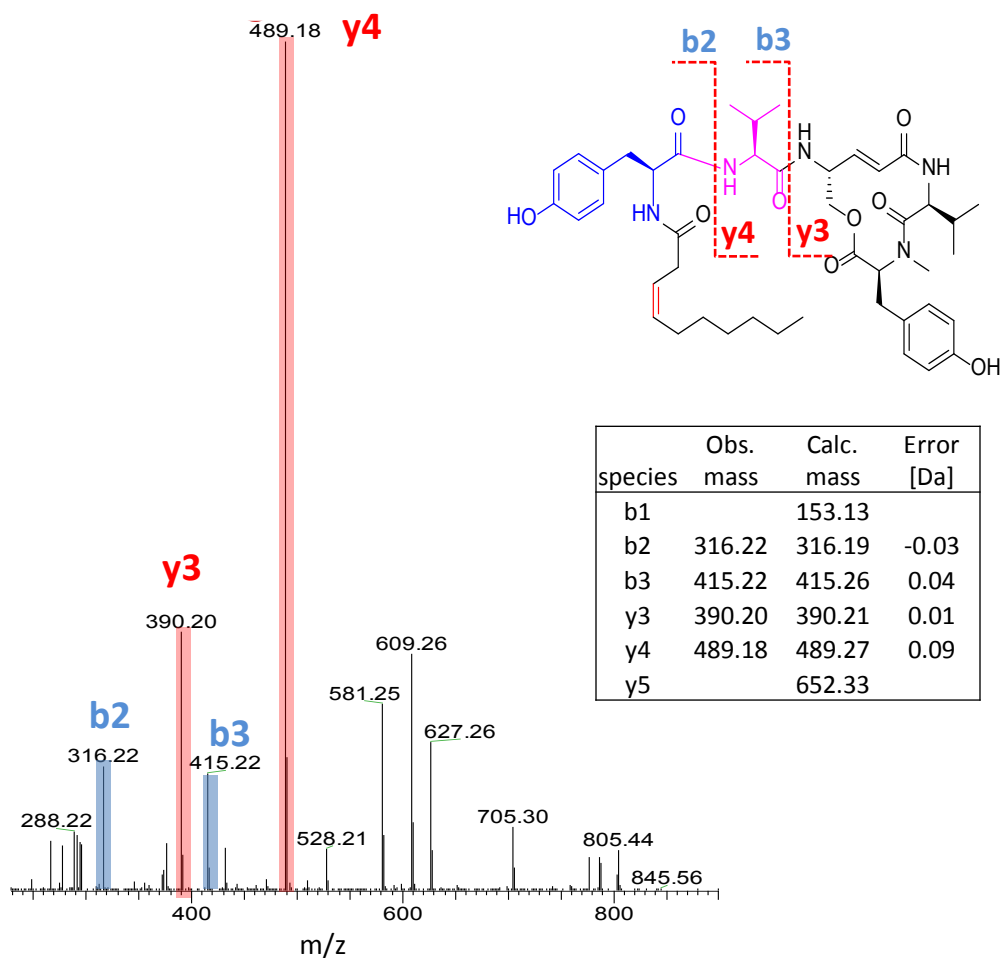

Figure S9. Characterization of thalassospiramide C (7). (A) MS<sup>n</sup> analysis.

**B**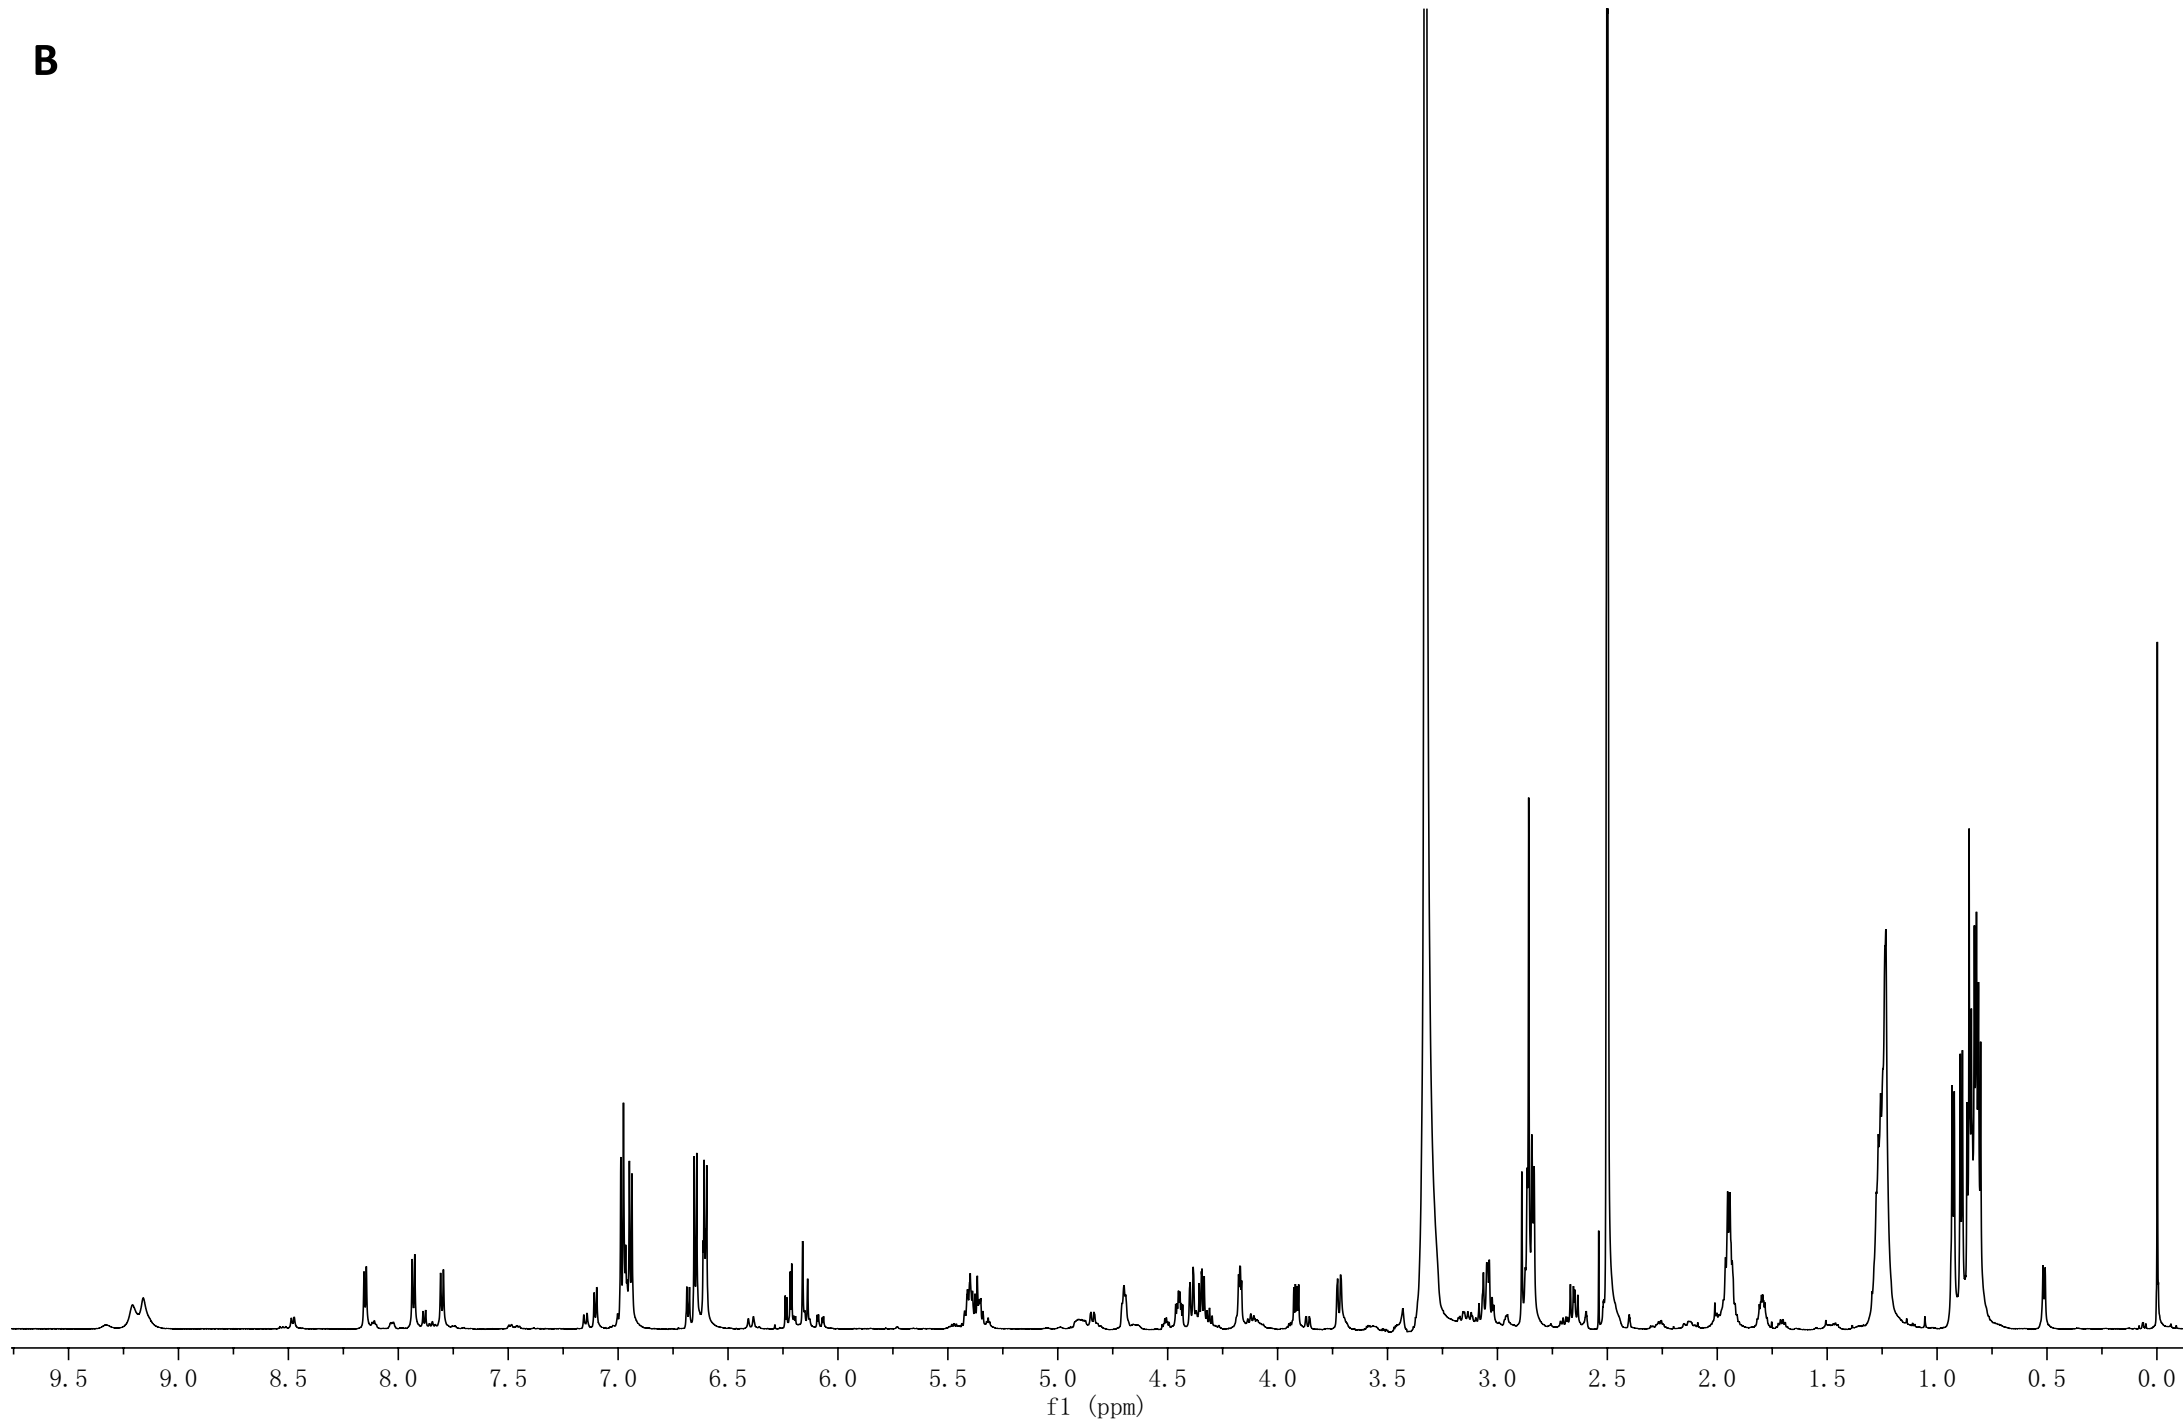

**Figure S9. Characterization of thalassospiramide C (7). (B)  $^1\text{H}$  spectrum in  $\text{DMSO-}d_5$ .**

C

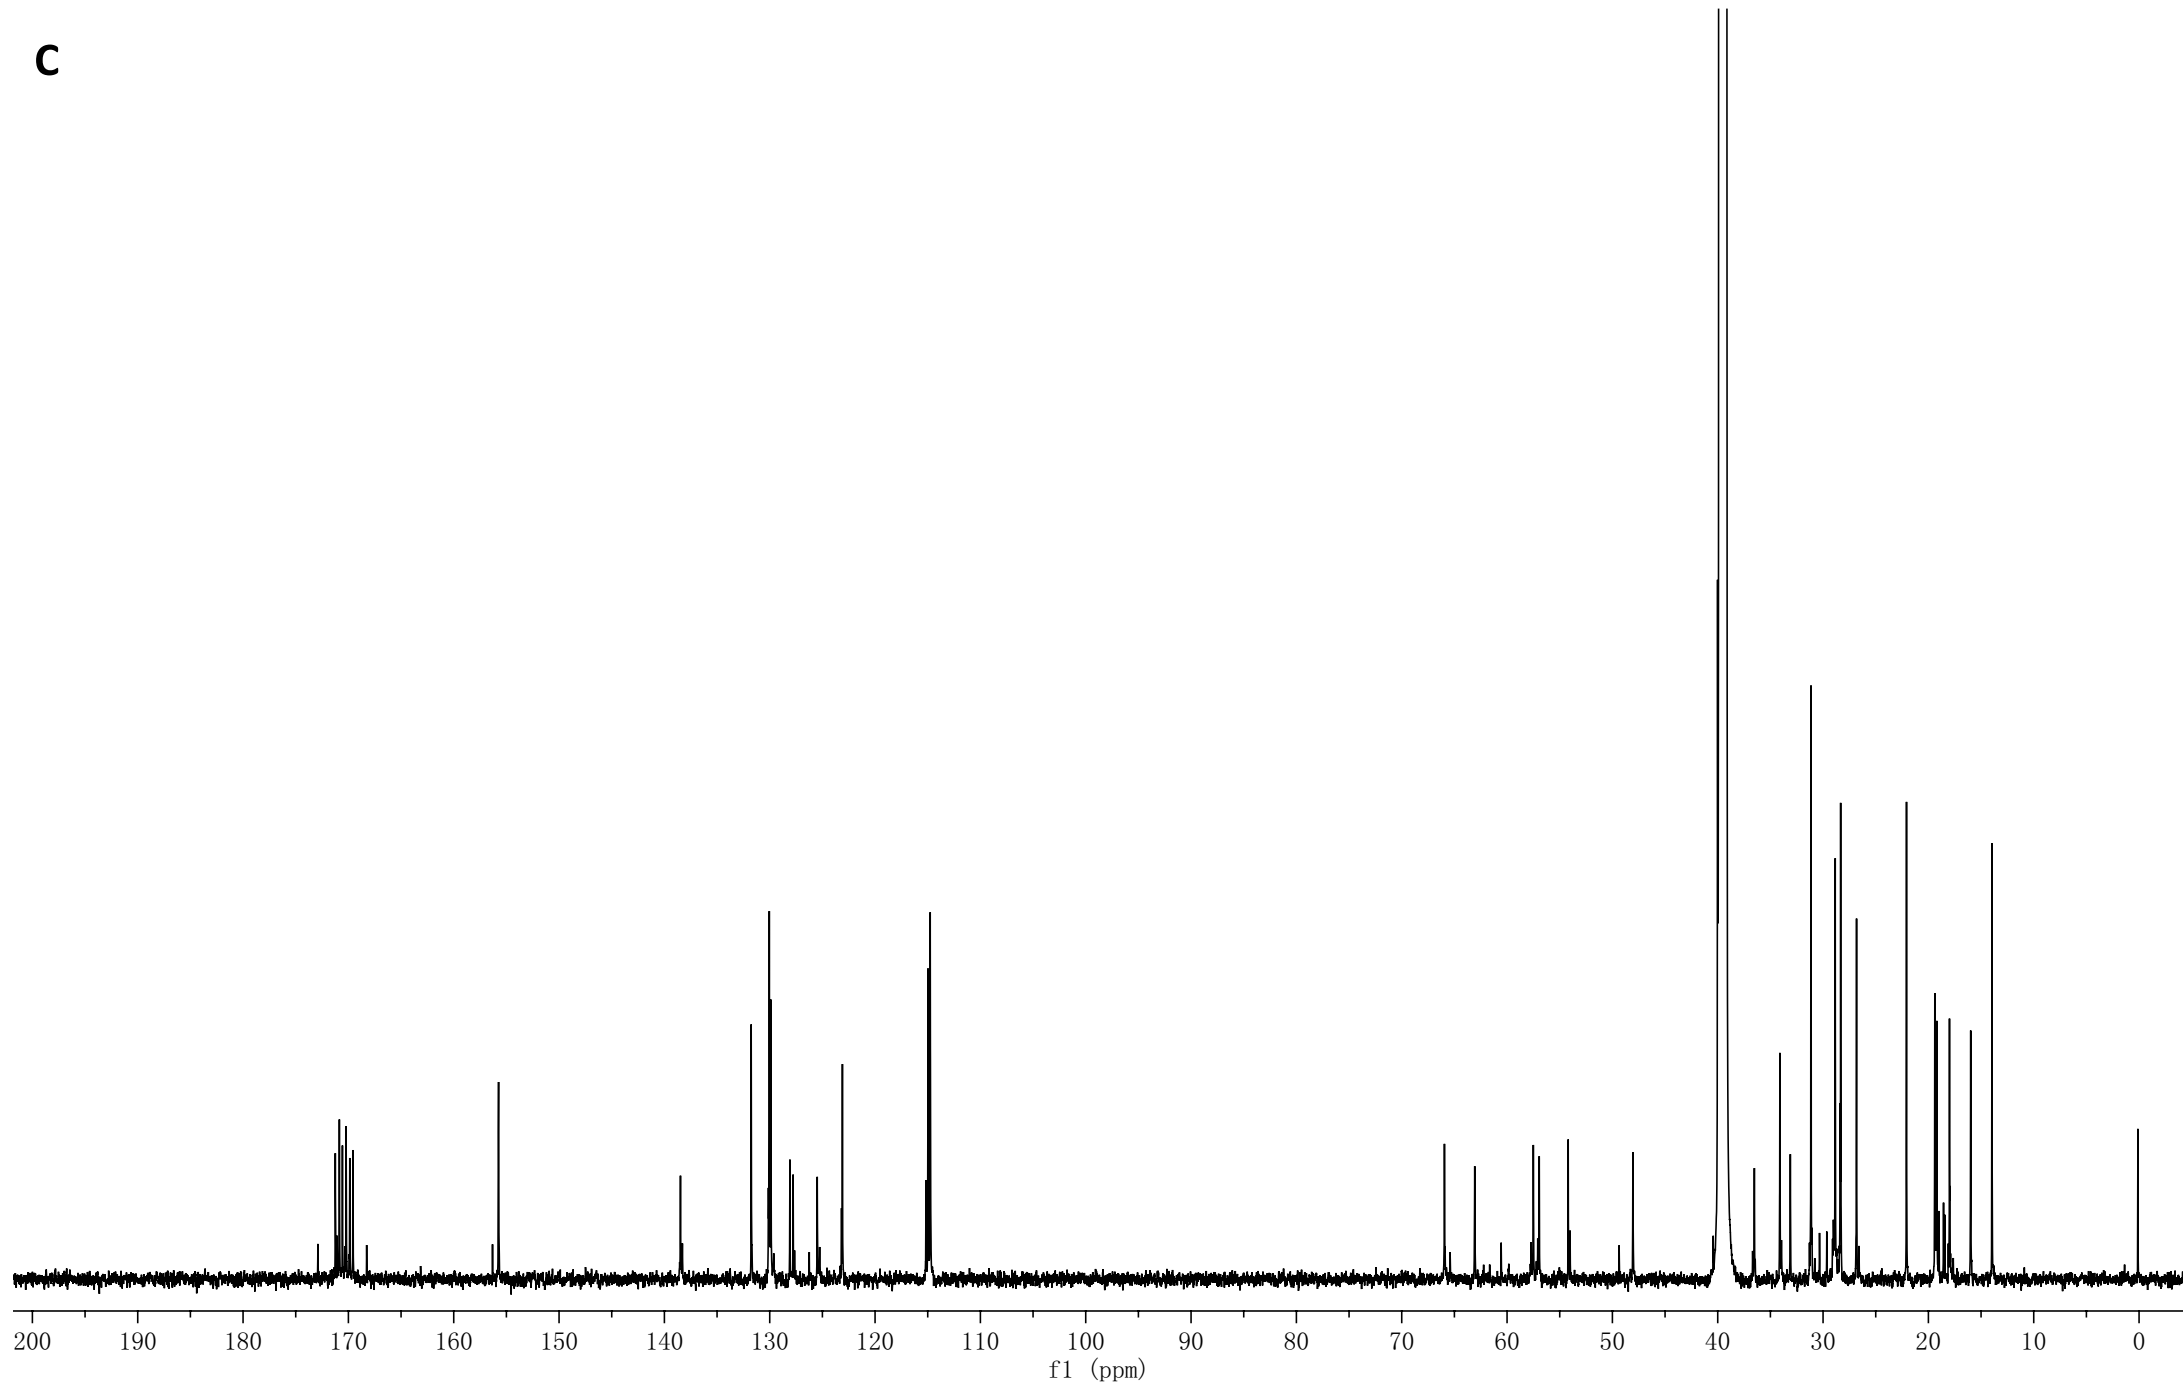

Figure S9. Characterization of thalassospiramide C (7). (C)  $^{13}\text{C}$  spectrum in  $\text{DMSO-}d_5$ .

**D**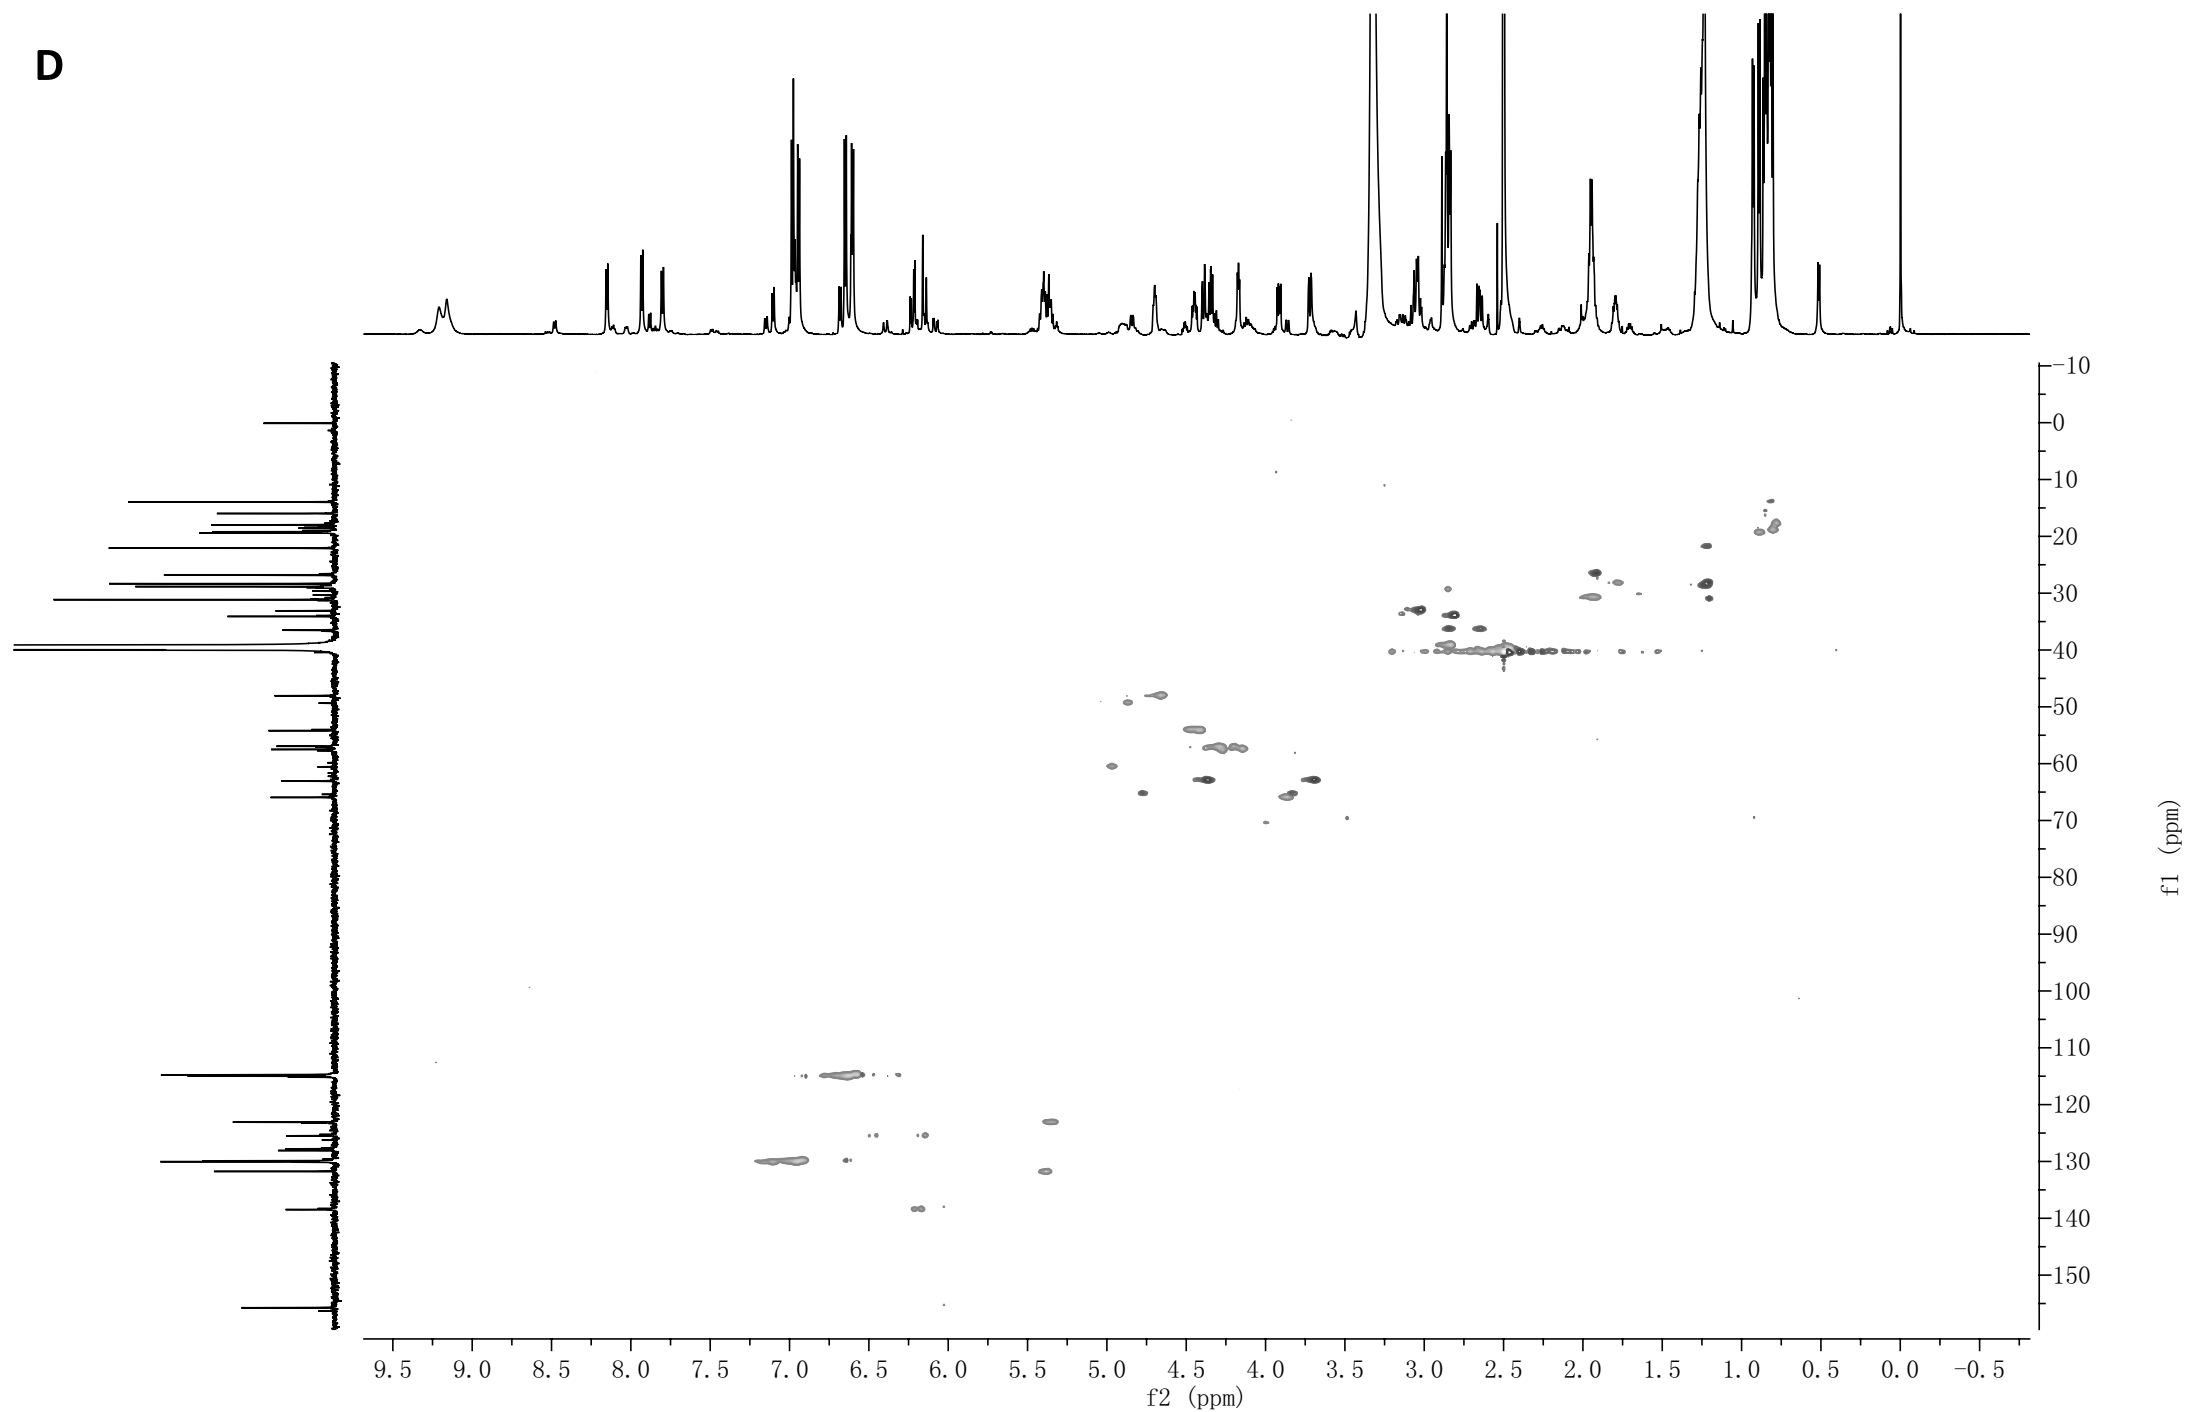

**Figure S9. Characterization of thalassospiramide C (7). (D) HMQC spectrum in DMSO-*d*<sub>5</sub>.**

**E**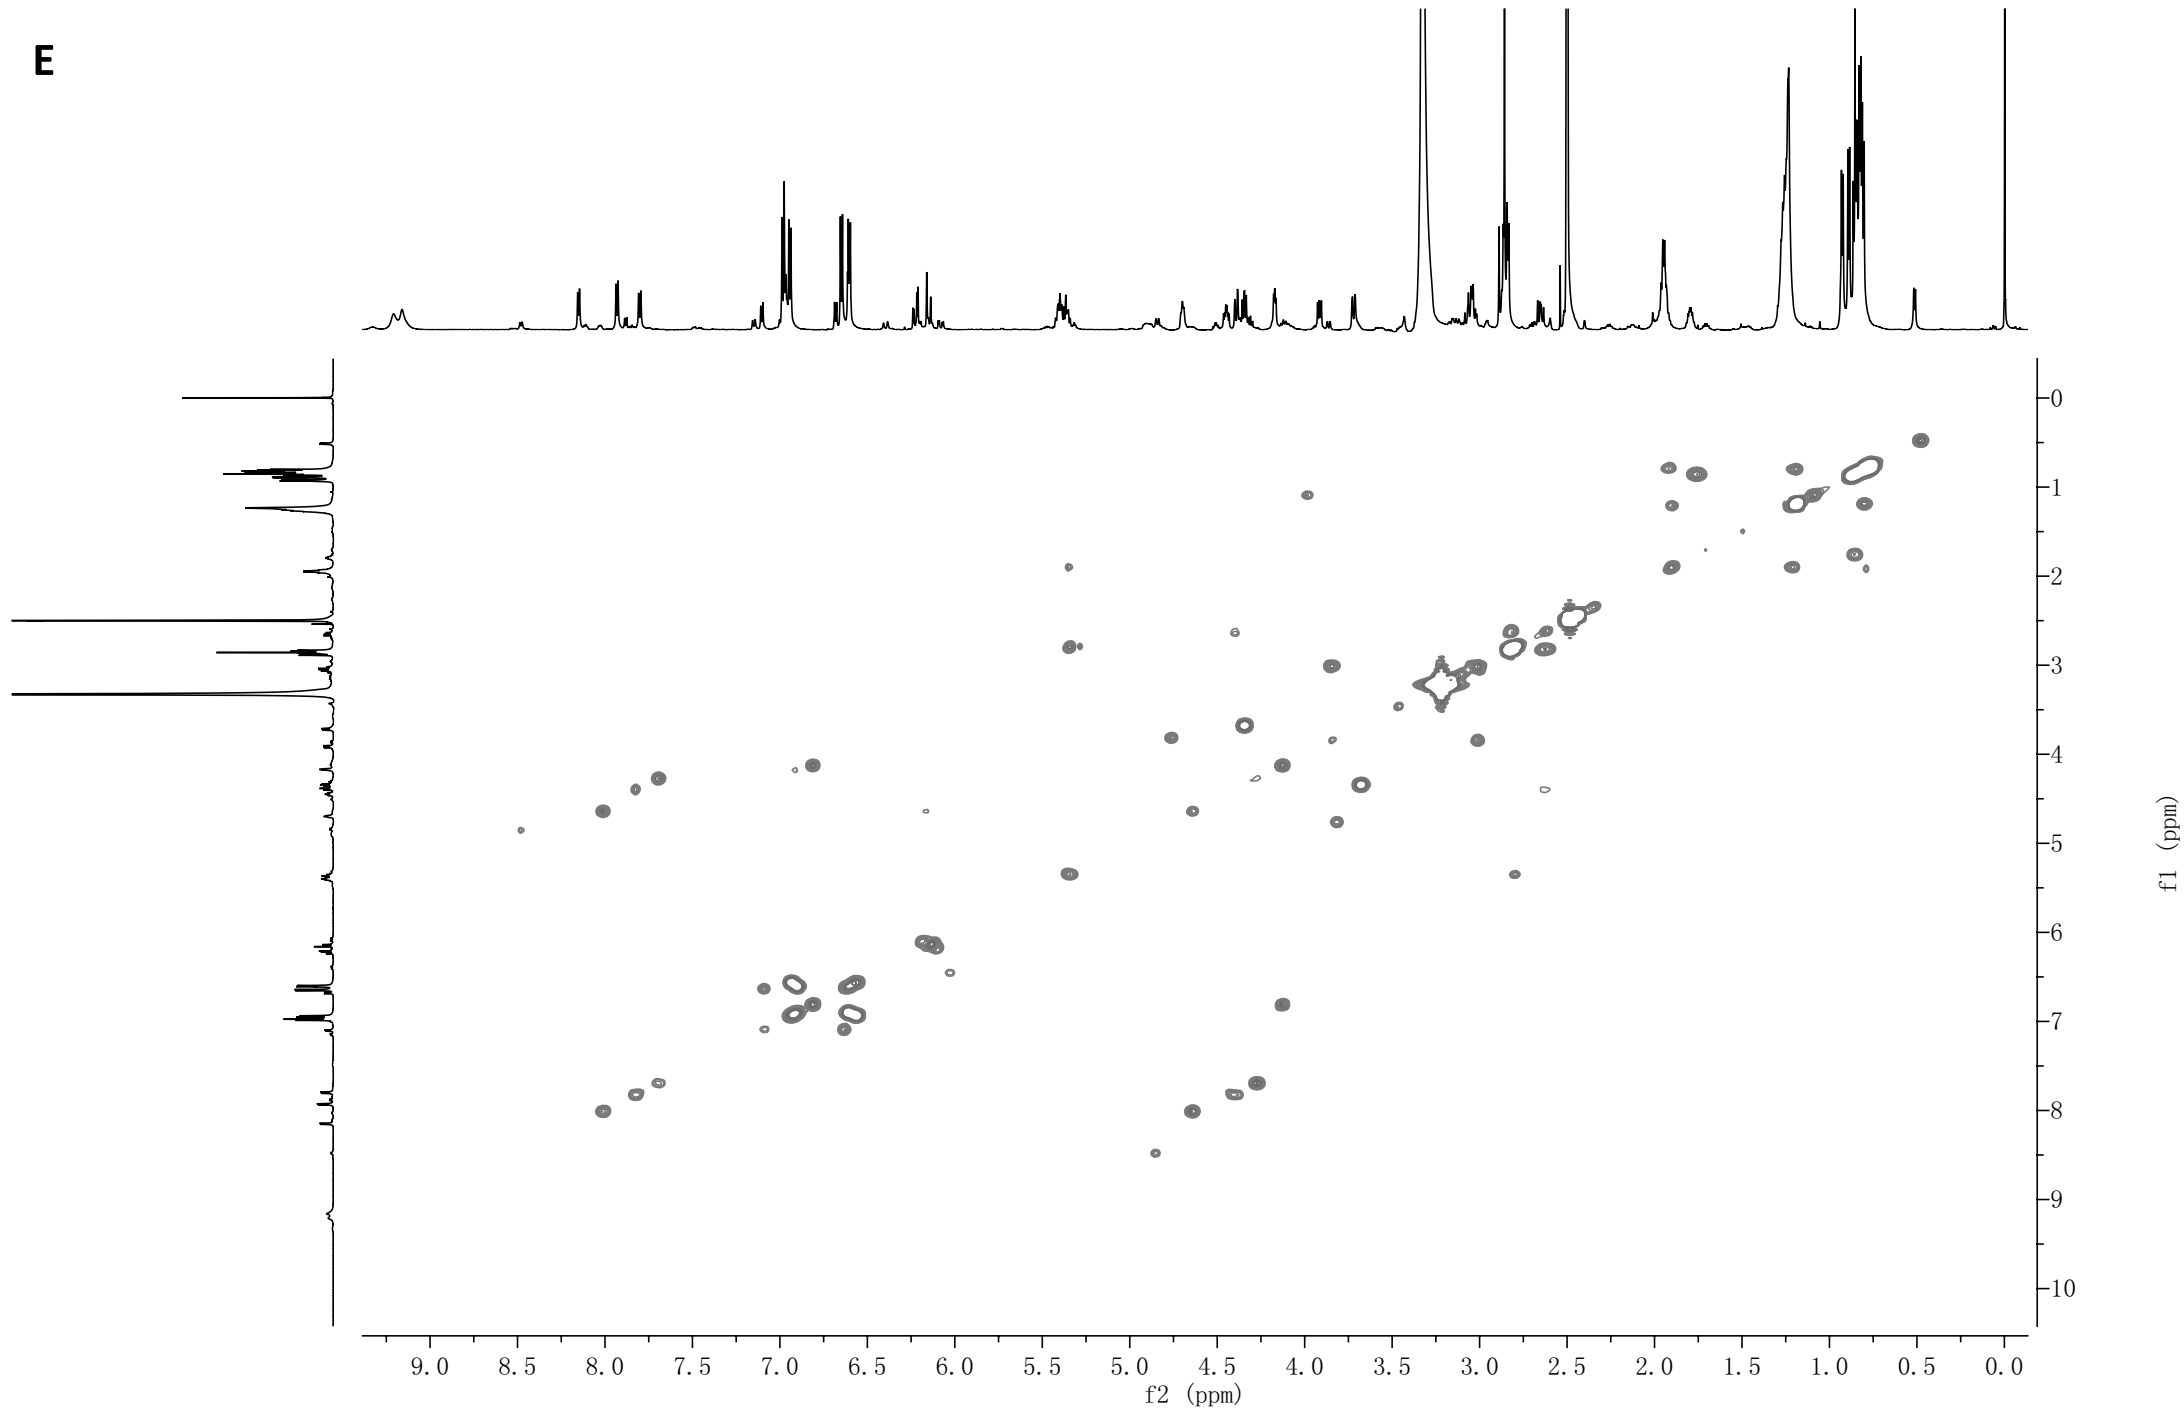

**Figure S9. Characterization of thalassospiramide C (7). (E)  $^1\text{H}$ - $^1\text{H}$  COSY spectrum in  $\text{DMSO-}d_5$ .**

**F**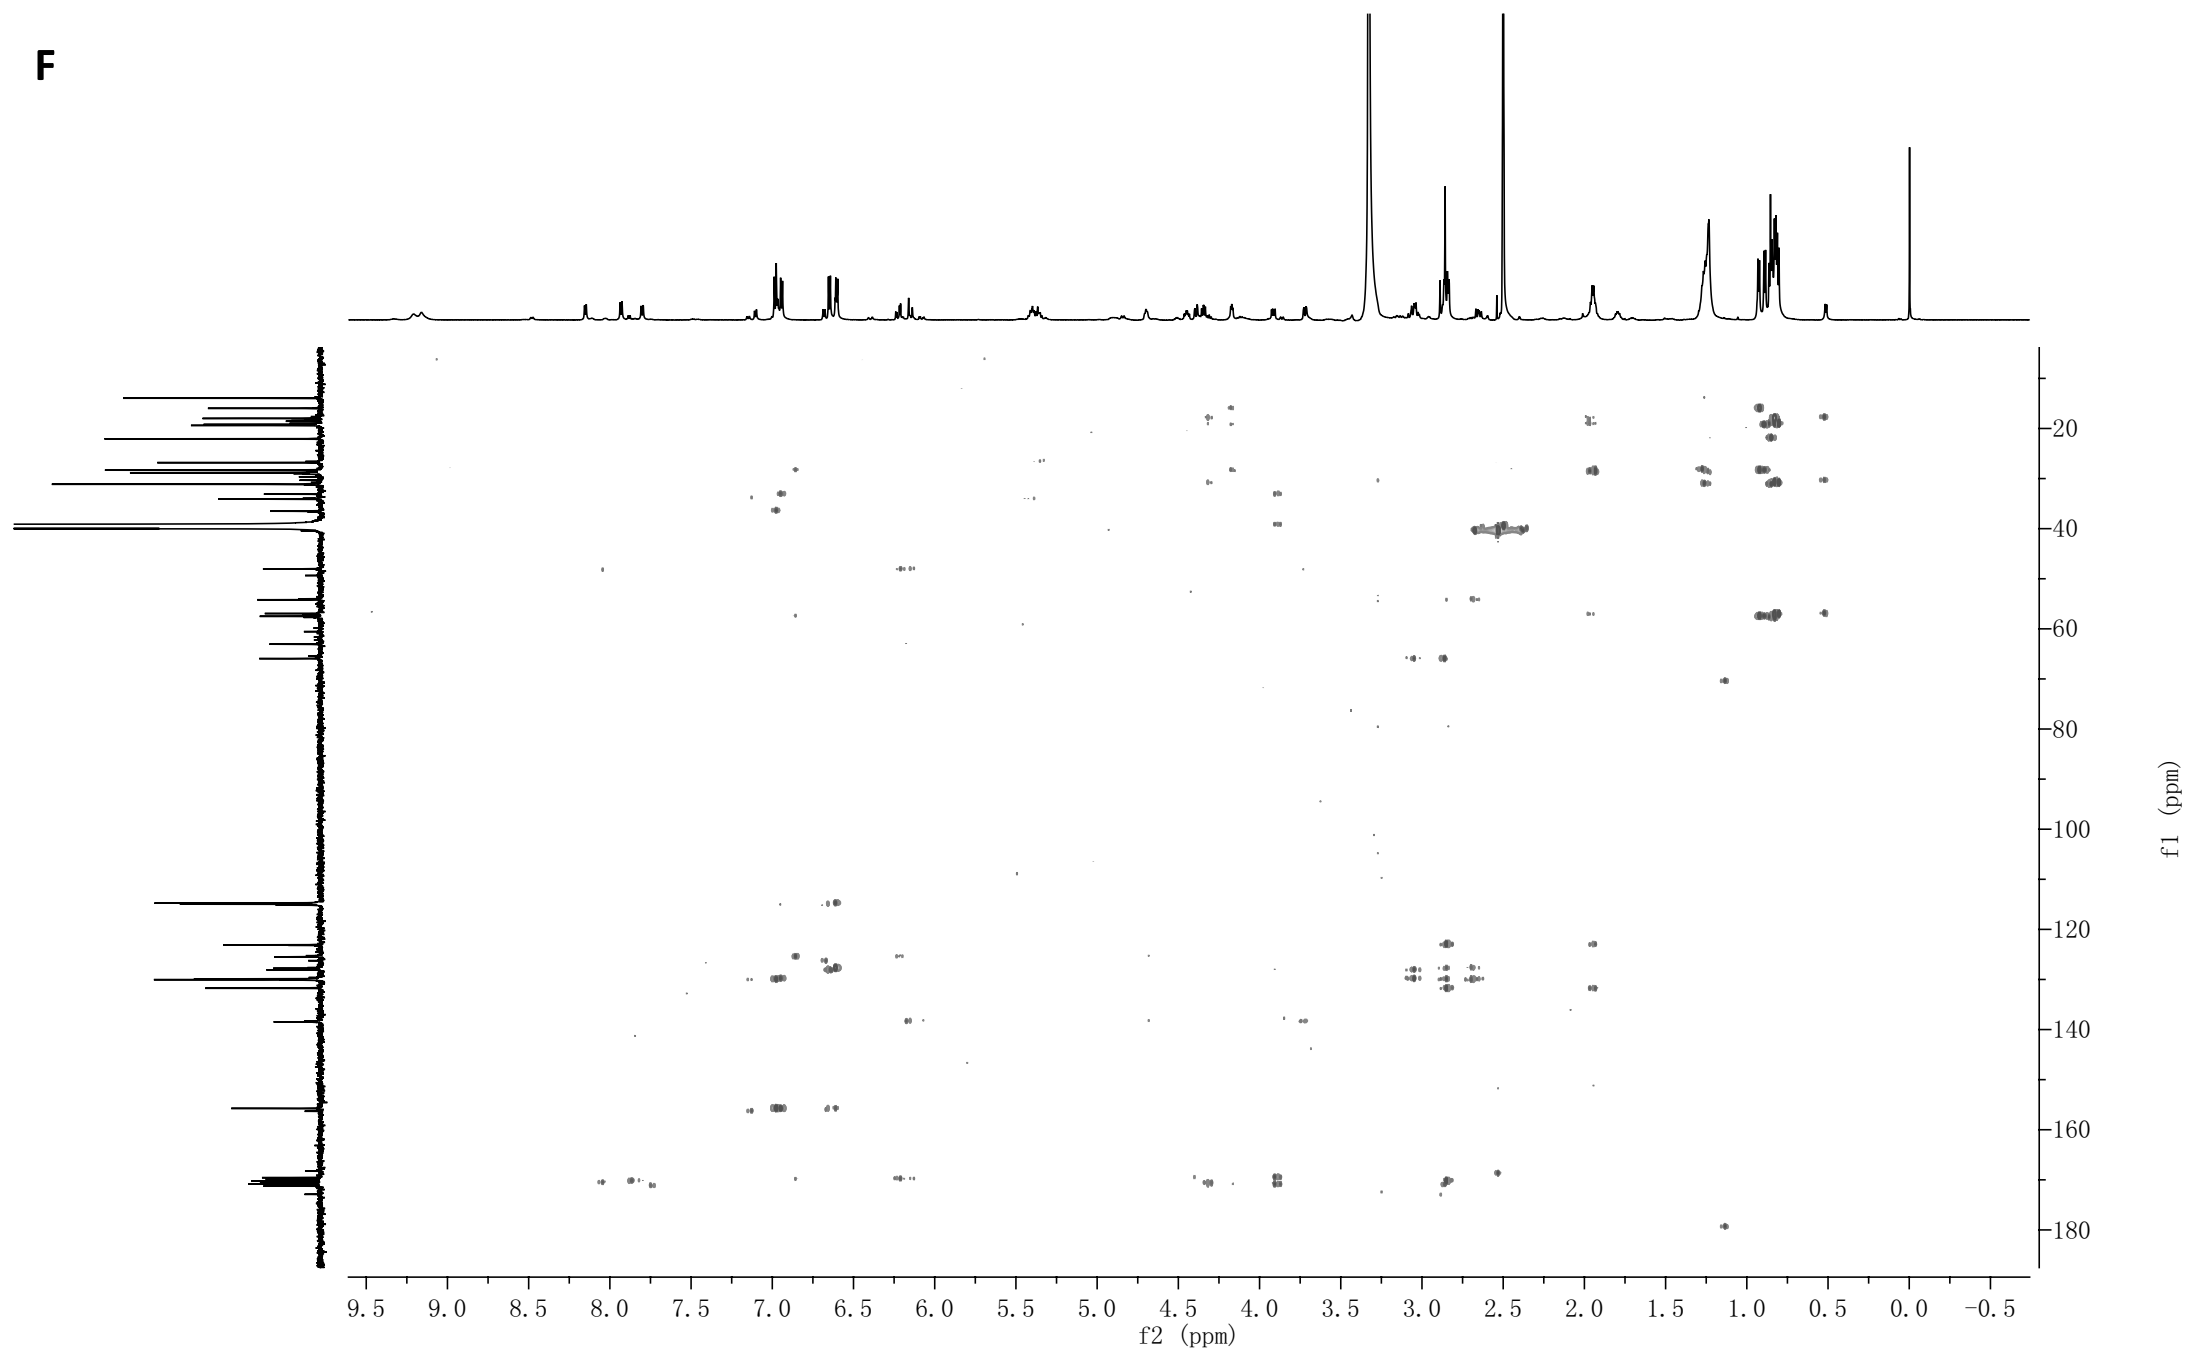

**Figure S9. Characterization of thalassospiramide C (7).** (F) HMBC spectrum in DMSO- $d_5$ .



**G**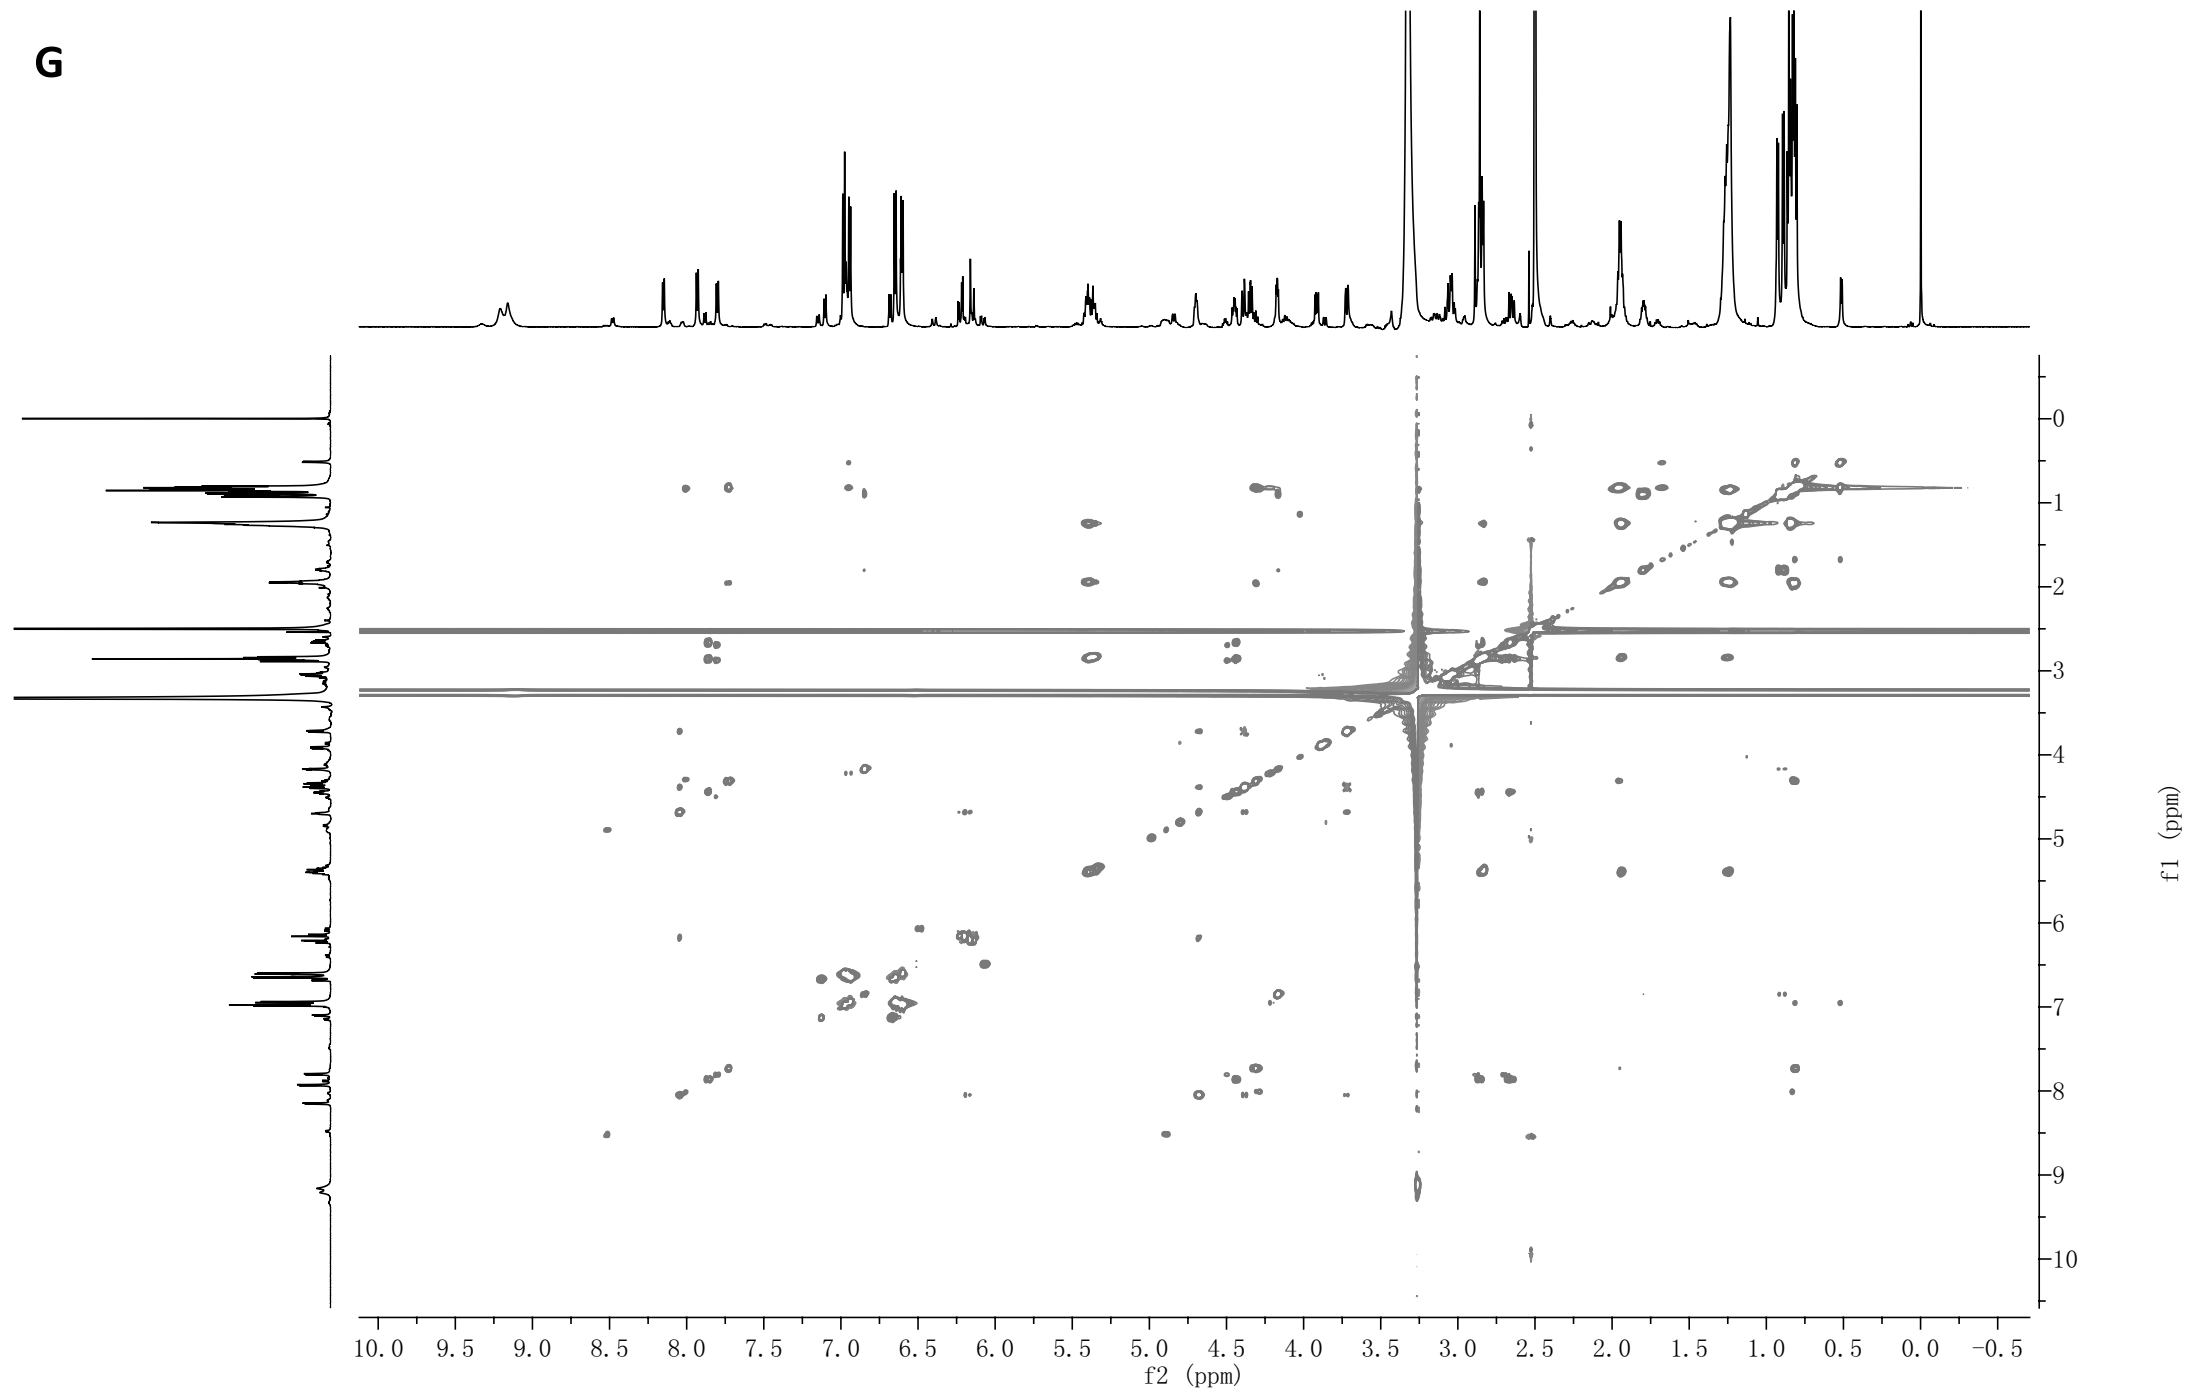

**Figure S9. Characterization of thalassospiramide C (7).** (G)  $^1\text{H}$ - $^1\text{H}$  TOCSY spectrum in  $\text{DMSO-}d_5$ .

## H

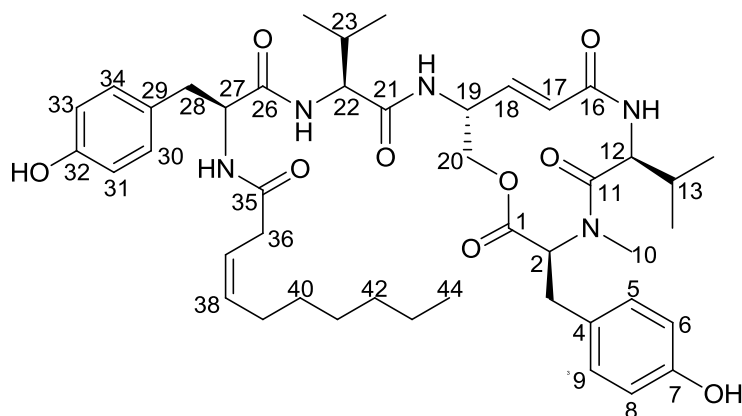NMR Spectral Data (700 MHz ( $^1\text{H}$ ), 175 MHz ( $^{13}\text{C}$ ) in  $\text{DMSO-}d_6$ ) of thalassospiramide C (7)

| C/H   | $\delta_{\text{H}}$ | mult ( $J$ in Hz) | $\delta_{\text{C}}$ |               | key HMBC    |
|-------|---------------------|-------------------|---------------------|---------------|-------------|
| 1     |                     |                   | 169.6               | C             |             |
| 2     | 3.9                 | dd(10.4,5.1)      | 66                  | CH            | 1,3,10      |
| 3a    | 3.03                | dd(14.1,4.4)      | 33.15               | $\text{CH}_2$ | 2,5,9       |
| 3b    | 3.06                | dd(14.1,10.9)     |                     |               | 2,5,9       |
| 4     |                     |                   | 128.1               | C             |             |
| 5     | 6.94                | d(8.4)            | 129.9               | CH            | 3,9         |
| 6     | 6.65                | d(8.4)            | 115                 | CH            | 4,7,8       |
| 7     |                     |                   | 155.8               | C             |             |
| 7-OH  | 6.68                | d(8.4)            |                     |               | 6,7,8       |
| 8     | 6.65                | d(8.4)            | 115                 | CH            | 4,6,7       |
| 9     | 6.94                | d(8.4)            | 129.9               | CH            | 3,5         |
| 10    | 2.85                | s                 | 40.1                | $\text{CH}_3$ | 2,11        |
| 11    |                     |                   | 170.9               | C             |             |
| 12    | 4.17                | dd(6.0,4.5)       | 57                  | CH            | 11,13,14,15 |
| 12-NH | 6.98                | d(7.0)            |                     |               | 12,13,16,17 |
| 13    | 1.82                | m                 | 28.6                | CH            |             |
| 14    | 0.93                | d(7.0)            | 19.2                | $\text{CH}_3$ | 12,13,15    |
| 15    | 0.89                | d(7.0)            | 16                  | $\text{CH}_3$ | 12,13,14    |
| 16    |                     |                   | 169.9               | C             |             |
| 17    | 6.16                | d(15.4)           | 125.4               | CH            | 16,18,19    |
| 18    | 6.22                | dd(16.1,4.9)      | 138.5               | CH            | 16,17,19    |
| 19    | 4.7                 | m                 | 48.1                | CH            | 17,18       |
| 19-NH | 8.16                | d(7)              |                     |               | 19,21       |
| 20a   | 3.72                | dd(11.6,2.2)      | 63.1                | $\text{CH}_2$ | 18          |
| 20b   | 4.38                | dd(11.6,2.2)      |                     |               | 1           |
| 21    |                     |                   | 170.6               | C             |             |
| 22    | 4.34                | dd(7.7,6.3)       | 57.5                | CH            | 21,23,24    |
| 22-NH | 7.8                 | d(7.0)            |                     |               | 26          |
| 23    | 1.98                | m                 | 31.2                | CH            | 22,24,25    |
| 24    | 0.83                | m                 | 19.4                | $\text{CH}_3$ | 22,23,24    |
| 25    | 0.83                | m                 | 18                  | $\text{CH}_3$ | 22,23,24    |
| 26    |                     |                   | 171.24              | C             |             |
| 27    | 4.45                | m                 | 53.8                | CH            |             |
| 27-NH | 7.93                | d(7.0)            |                     |               | 35          |
| 28a   | 2.66                | dd(13.9,9.7)      | 36.5                | $\text{CH}_2$ | 27,29,30,34 |
| 28b   | 2.84                | m                 |                     |               | 29,30,34    |

|       |      |                |       |                 |          |
|-------|------|----------------|-------|-----------------|----------|
| 29    |      |                | 127.7 |                 |          |
| 30    | 6.98 | d(8.5)         | 130   | CH              | 28,34    |
| 31    | 6.6  | d(8.5)         | 114.8 | CH              | 29,32,33 |
| 32    |      |                | 155.8 |                 |          |
| 32-OH | 7.1  | d(7.3)         |       |                 | 30,32,34 |
| 33    | 6.6  | d(8.5)         | 114.8 | CH              | 29,31,32 |
| 34    | 6.98 | d(8.5)         | 130   | CH              | 28,30    |
| 35    |      |                | 170.2 |                 |          |
| 36    | 2.88 | m              | 33.9  | CH <sub>2</sub> | 35,37,38 |
| 37    | 5.4  | dt(11.9,8,2.7) | 131.7 | CH              | 36       |
| 38    | 5.37 | dt(11.9,8,2.7) | 123.1 | CH              | 39       |
| 39    | 1.95 | m              | 26.8  | CH <sub>2</sub> | 37,38,40 |
| 40    | 1.24 | m              | 28.8  | CH <sub>2</sub> | 41       |
| 41    | 1.24 | m              | 28.2  | CH <sub>2</sub> | 42       |
| 42    | 1.24 | m              | 31.2  | CH <sub>2</sub> | 41       |
| 43    | 1.25 | m              | 22.1  | CH <sub>2</sub> | 42       |
| 44    | 0.83 | t(7.0)         | 13.9  | CH <sub>3</sub> | 42,43    |

**Figure S9. Characterization of thalassospiramide C. (H) NMR assignment.**

# A ESI-TOF-HRMS

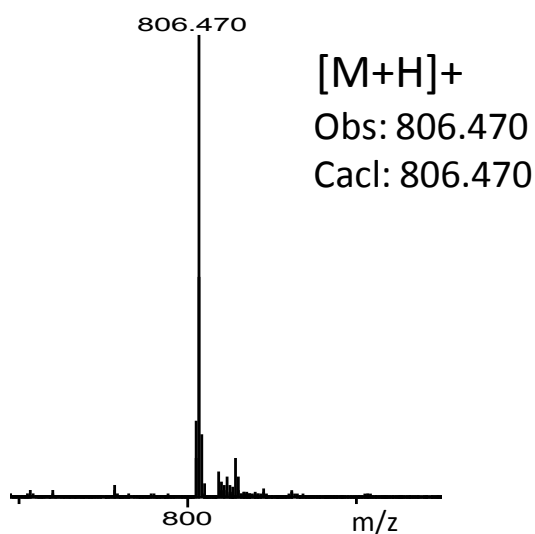

## ITMS<sup>2</sup> – 806 m/z (1+)

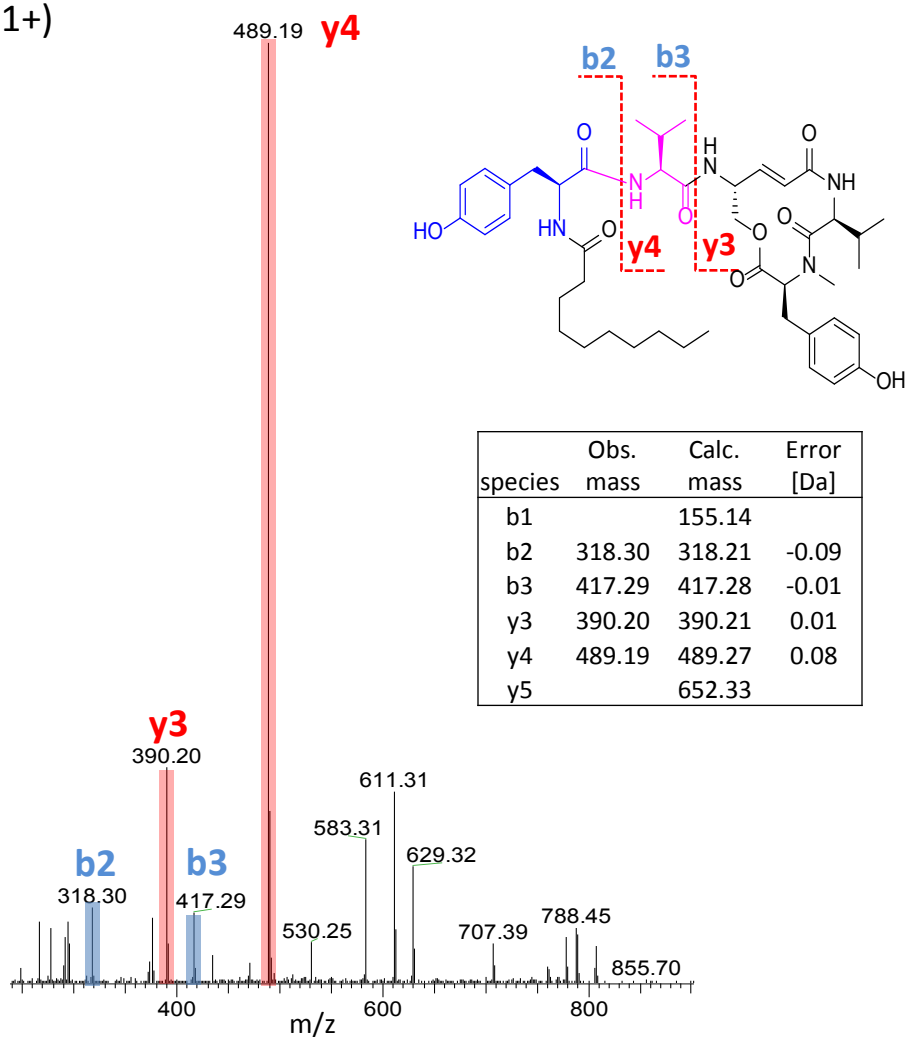

Figure S10. Characterization of thalassospiramide C1 (8). (A) MS<sup>n</sup> analysis.

# A ESI-TOF-HRMS

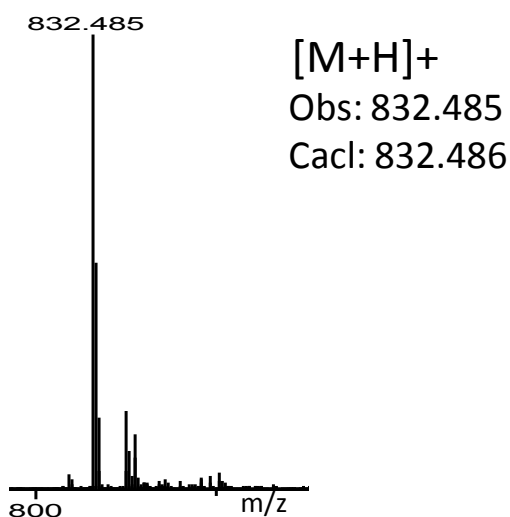

## ITMS<sup>2</sup> – 832 m/z (1+)

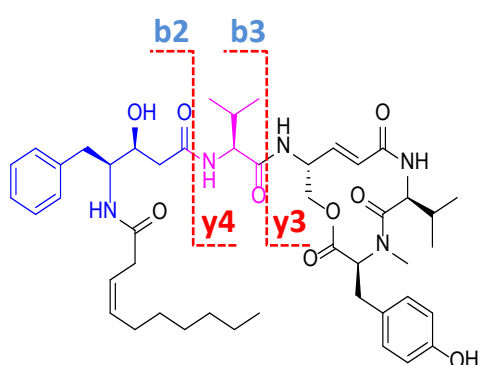

| species             | Obs. mass | Calc. mass | Error [Da] |
|---------------------|-----------|------------|------------|
| b1                  |           | 153.13     |            |
| b2                  |           | 344.22     |            |
| b2-H <sub>2</sub> O | 326.29    | 326.21     | -0.08      |
| b3                  | 443.33    | 443.30     | -0.03      |
| y3                  | 390.26    | 390.21     | -0.05      |
| y4                  | 489.31    | 489.27     | -0.04      |
| y5                  |           | 680.37     |            |

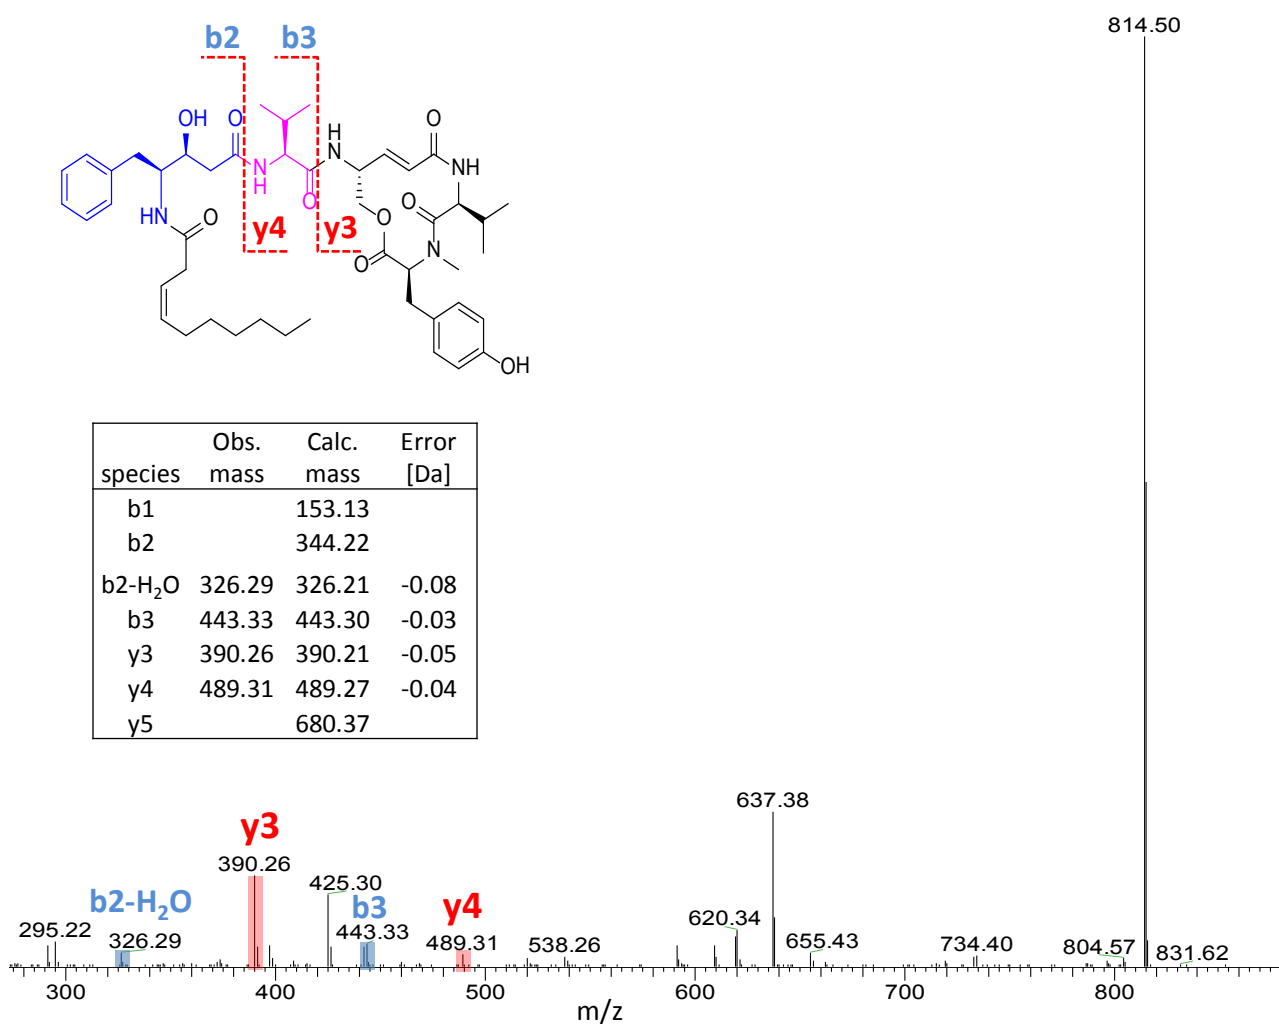

Figure S11. Characterization of thalassospiramide D (14). (A) MS<sup>n</sup> analysis.

**B**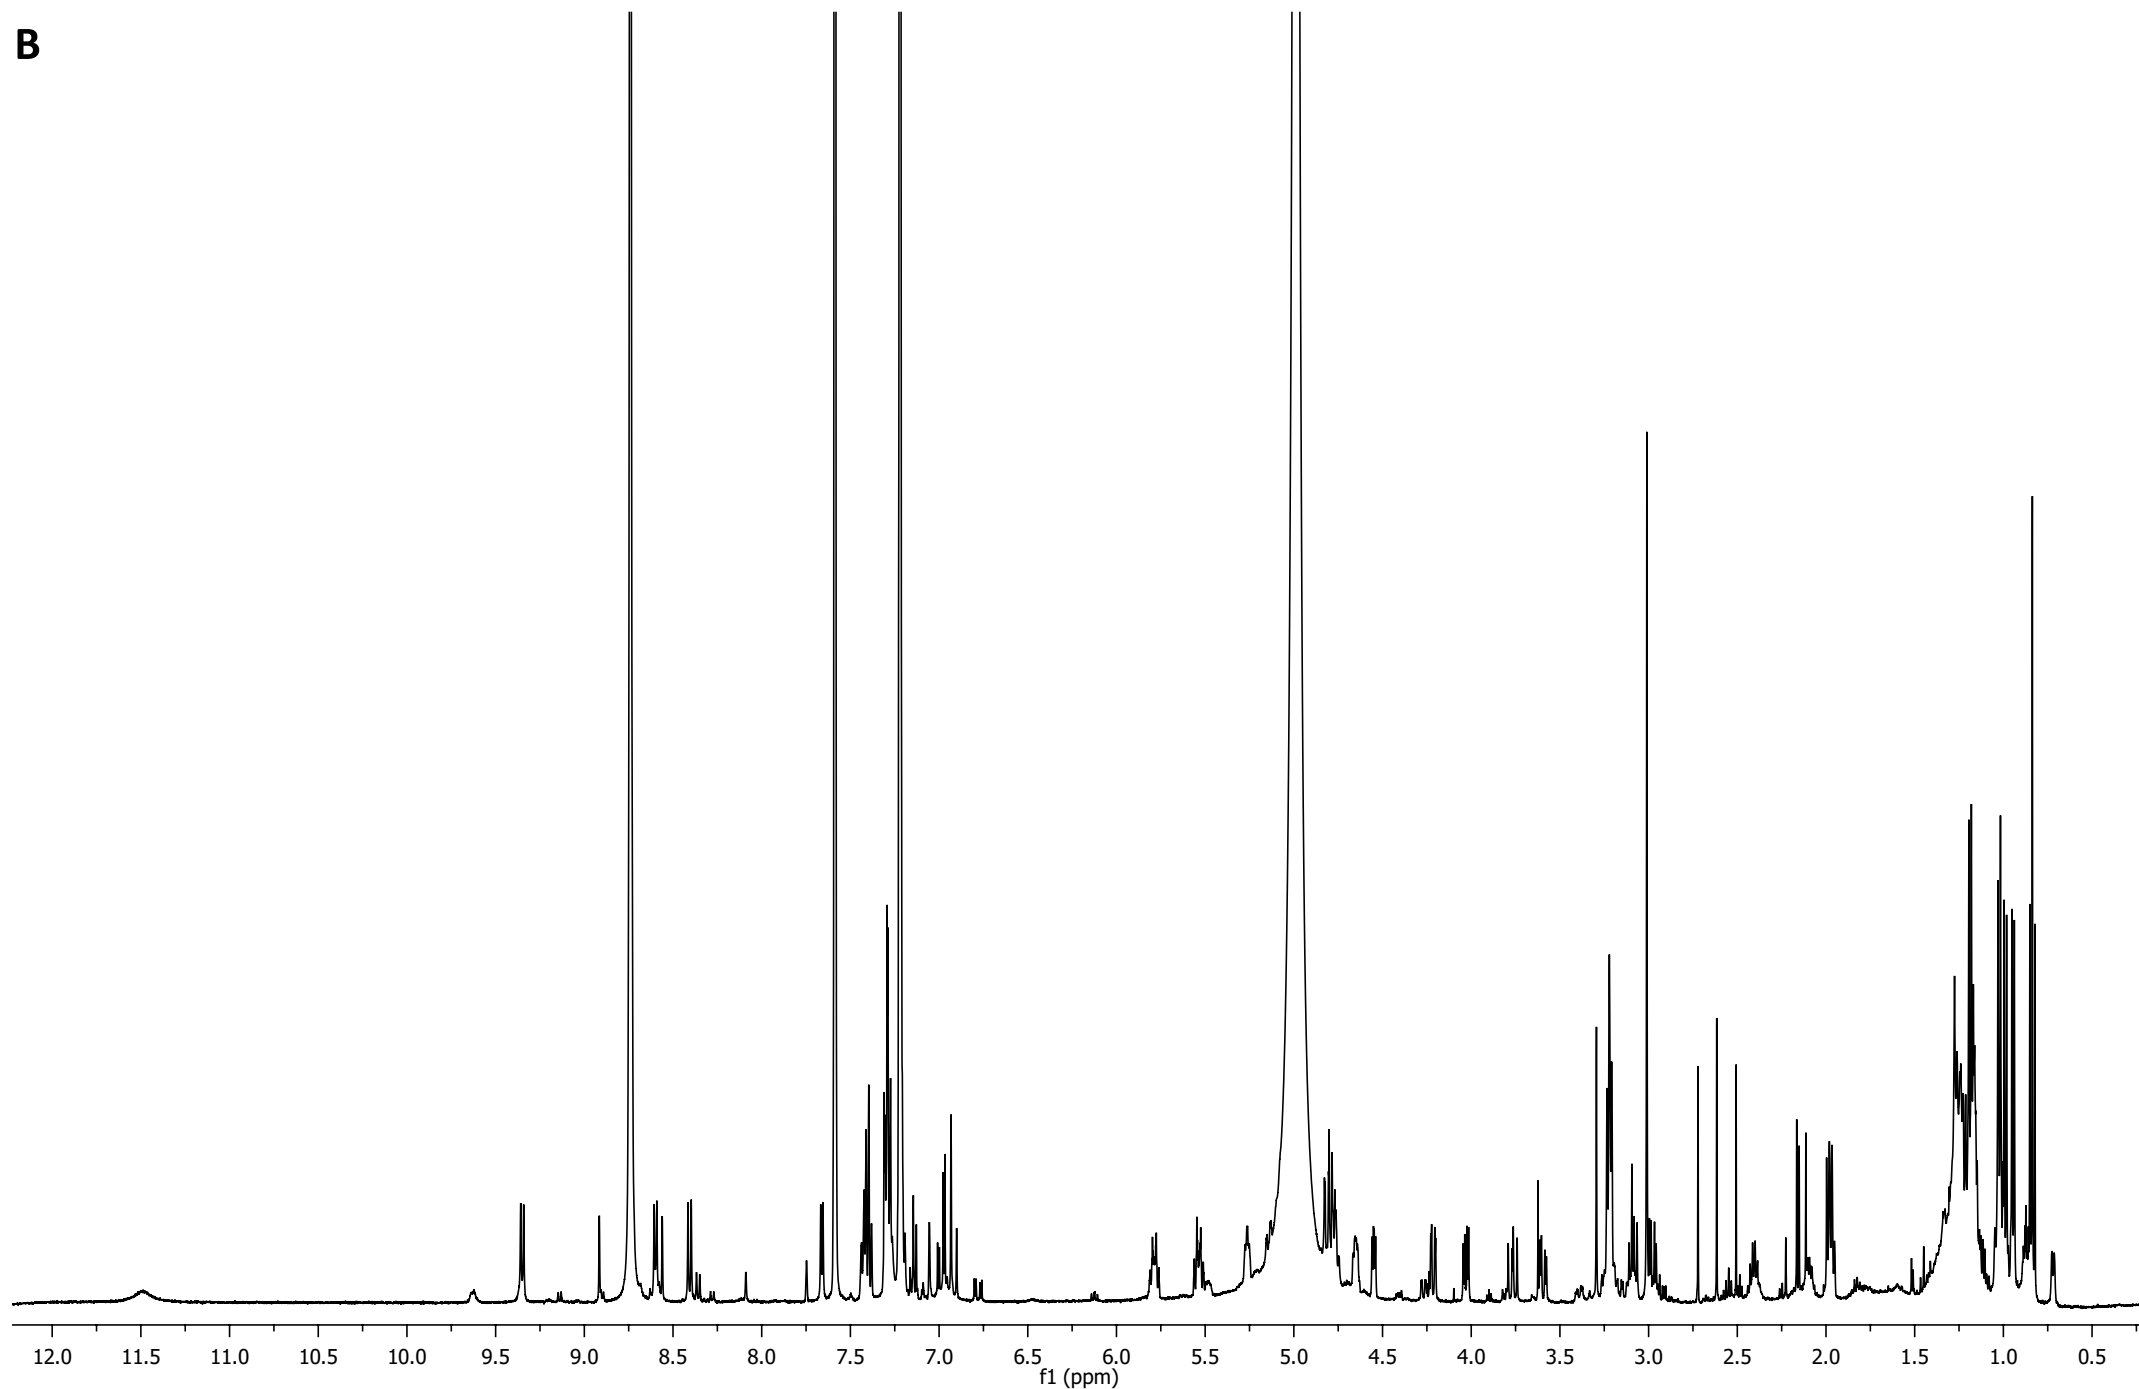

**Figure S11. Characterization of thalassospiramide D (14). (B)  $^1\text{H}$  spectrum in  $\text{pyridine-}d_5$ .**

**C**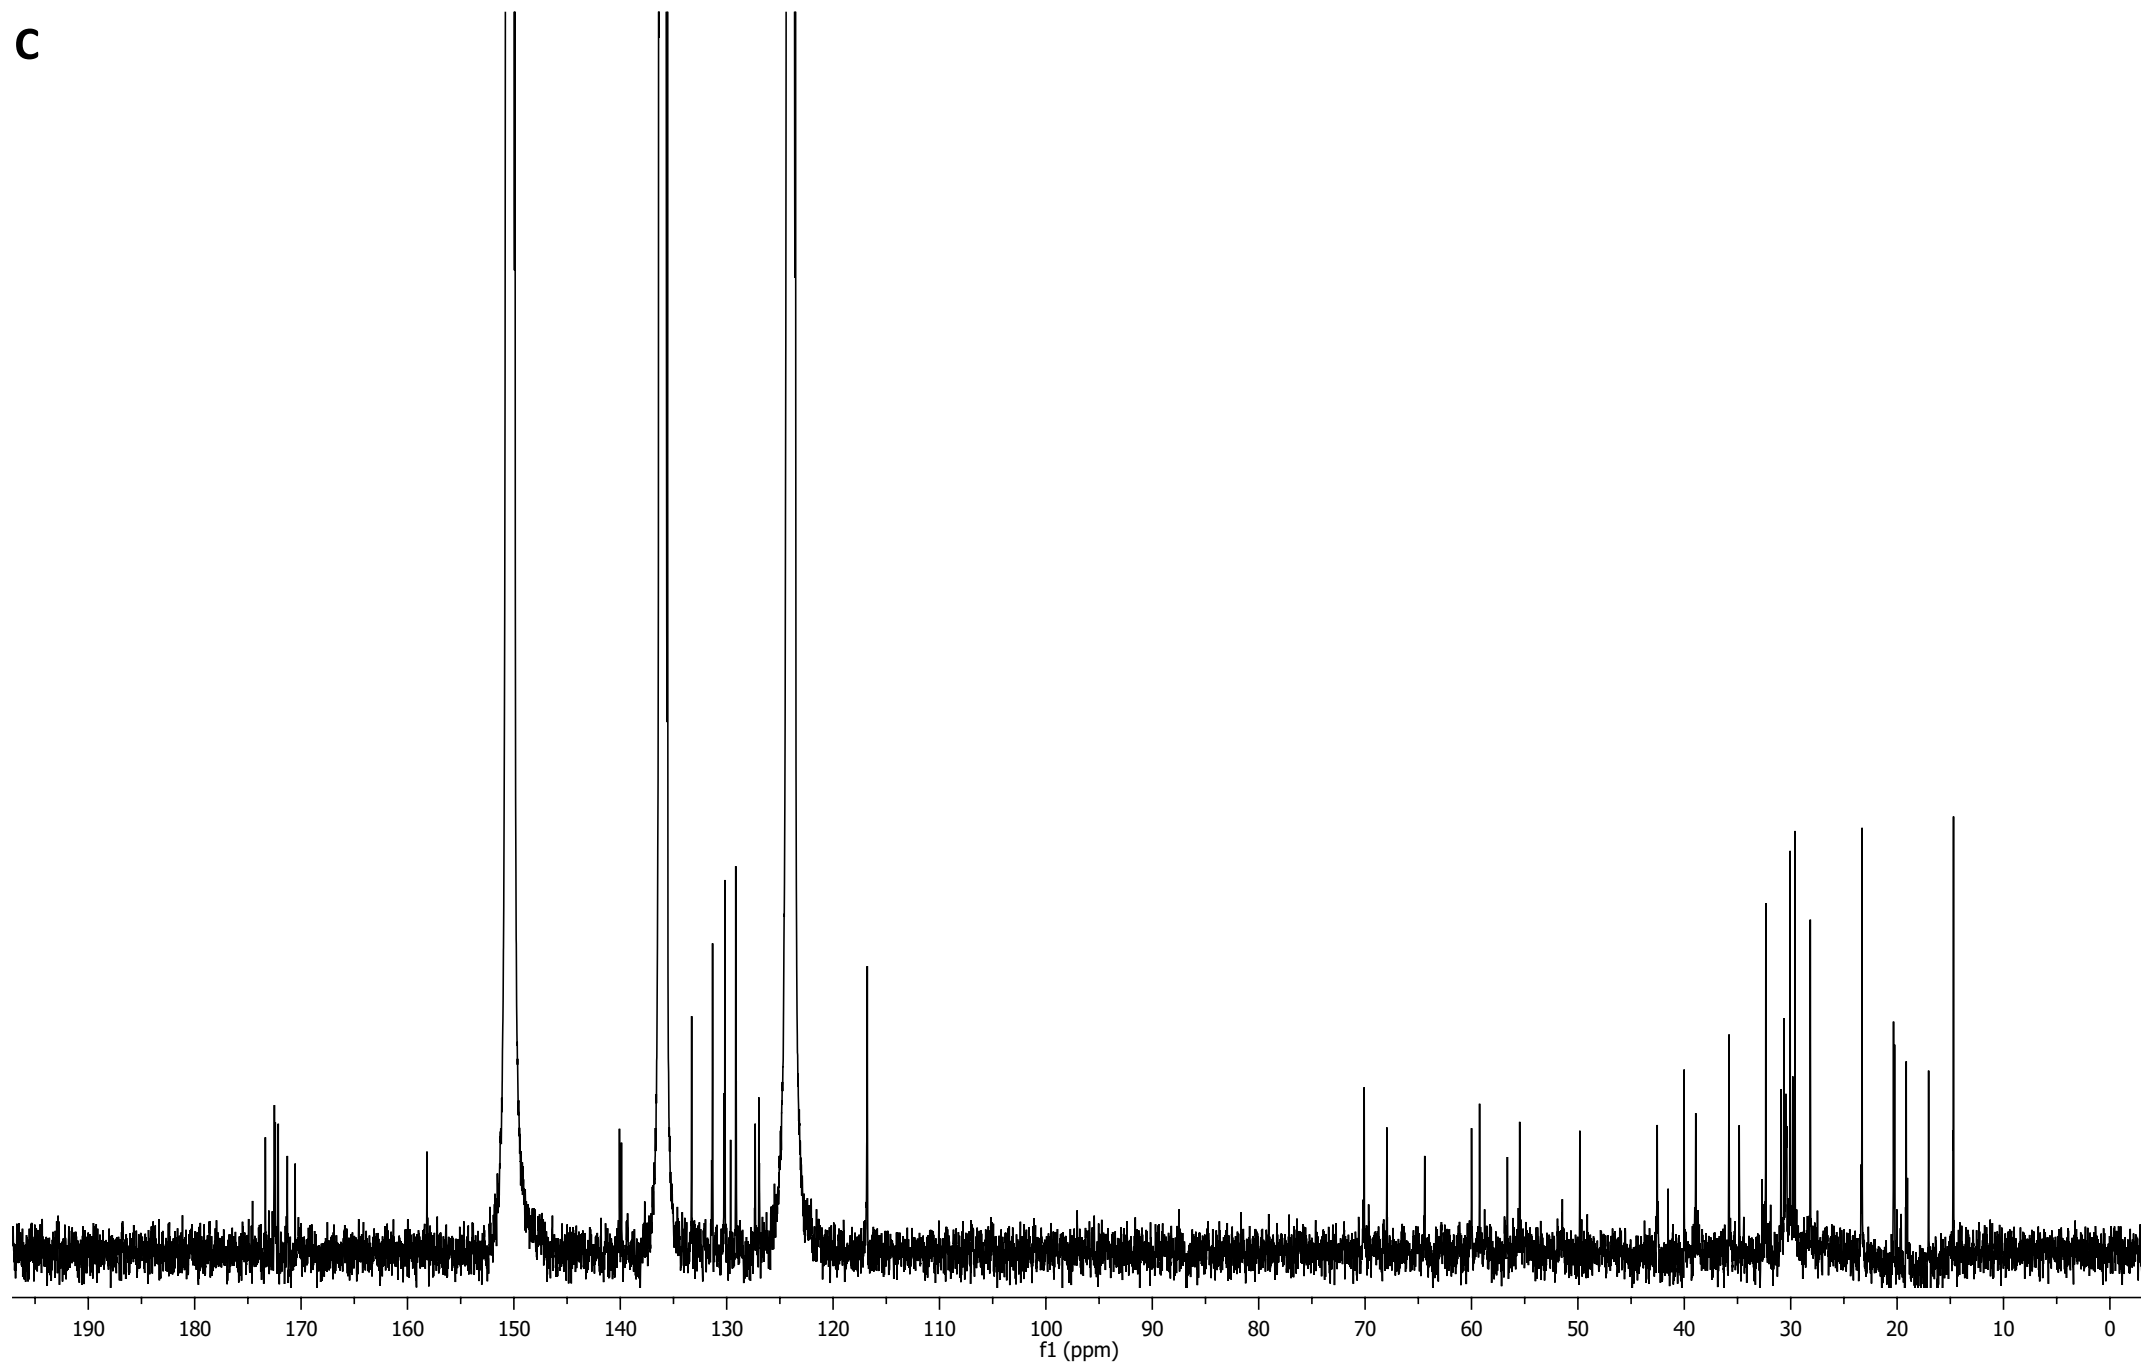

**Figure S11. Characterization of thalassospiramide D (14).** (C)  $^{13}\text{C}$  spectrum in  $\text{pyridine-}d_5$ .

**D**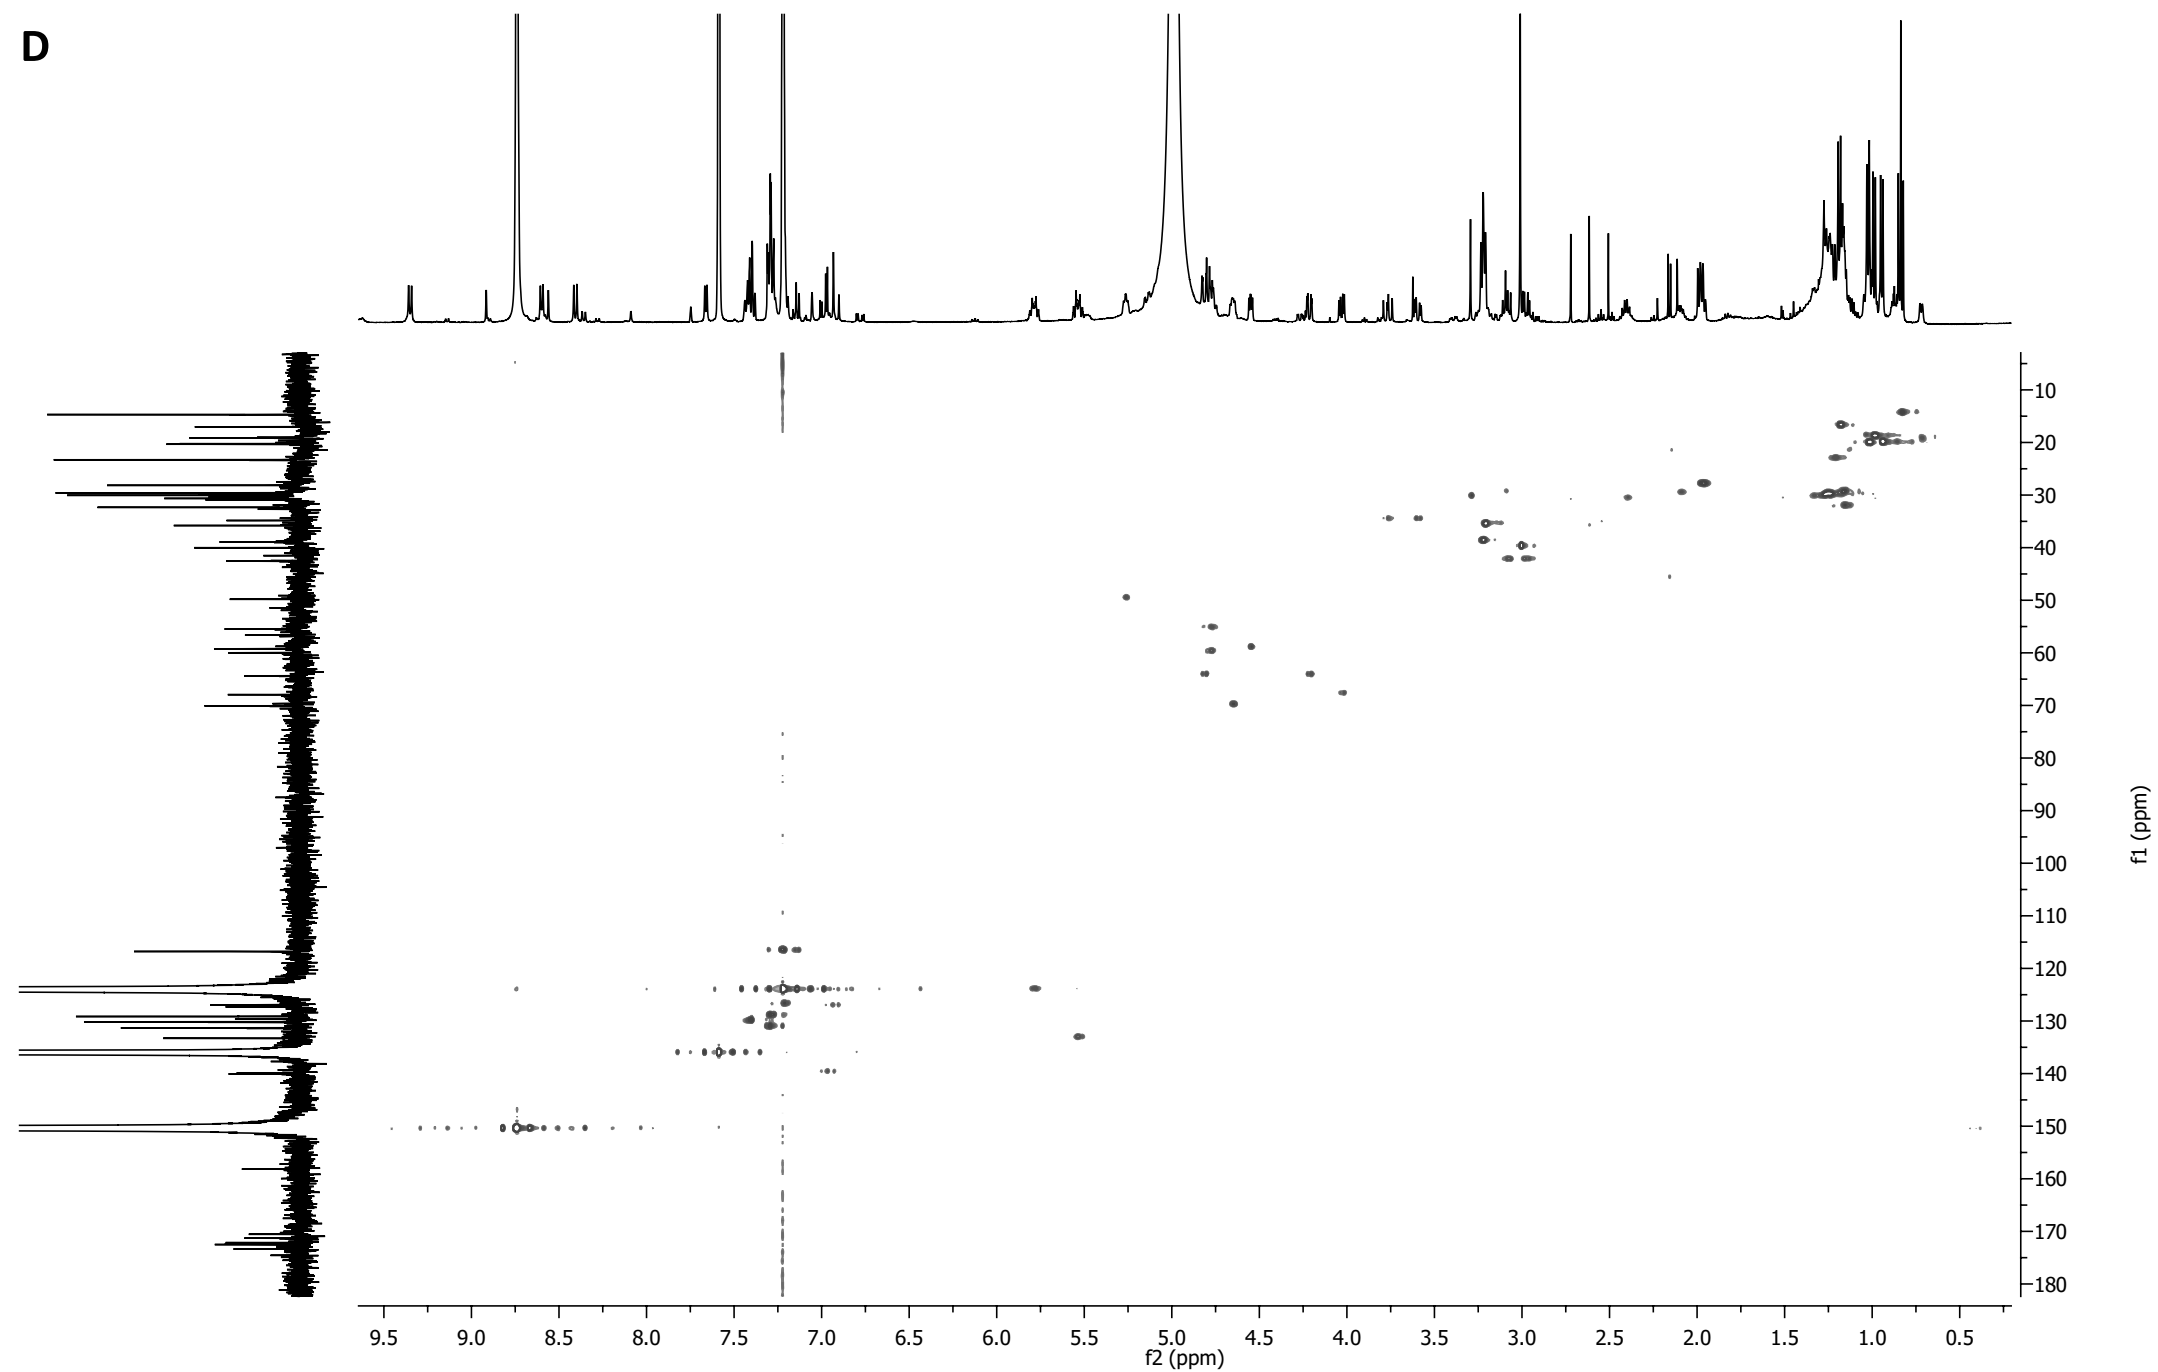

**Figure S11. Characterization of thalassospiramide D (14).** (D) HMQC spectrum in pyridine- $d_5$ .



**E**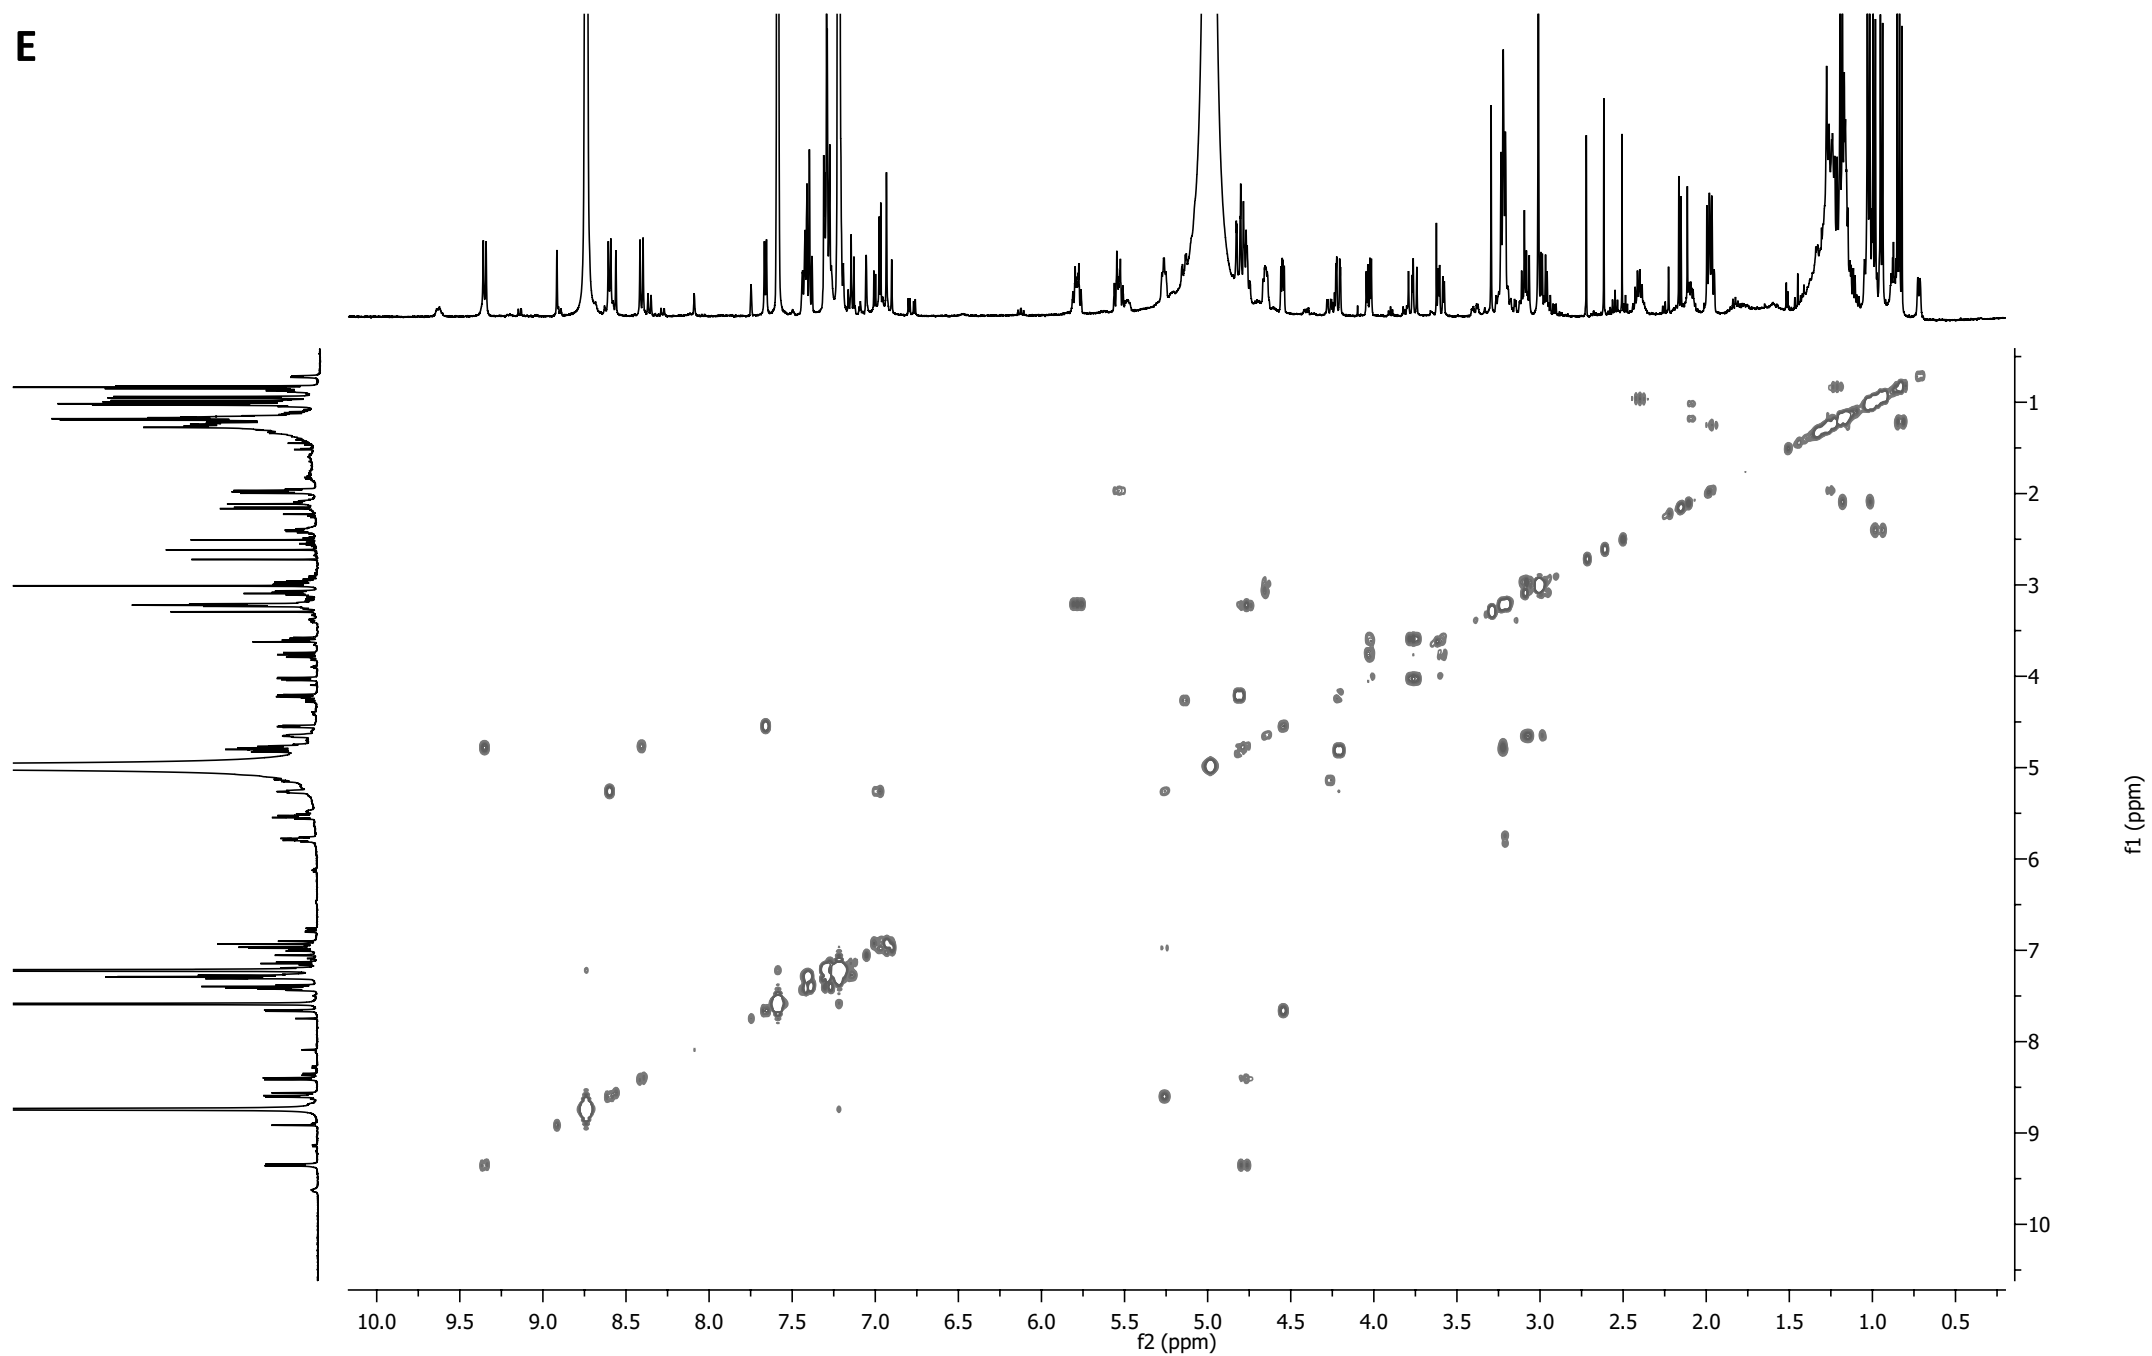

**Figure S11. Characterization of thalassospiramide D (14).** (E)  $^1\text{H}$ - $^1\text{H}$  COSY spectrum in pyridine- $d_5$ .

**F**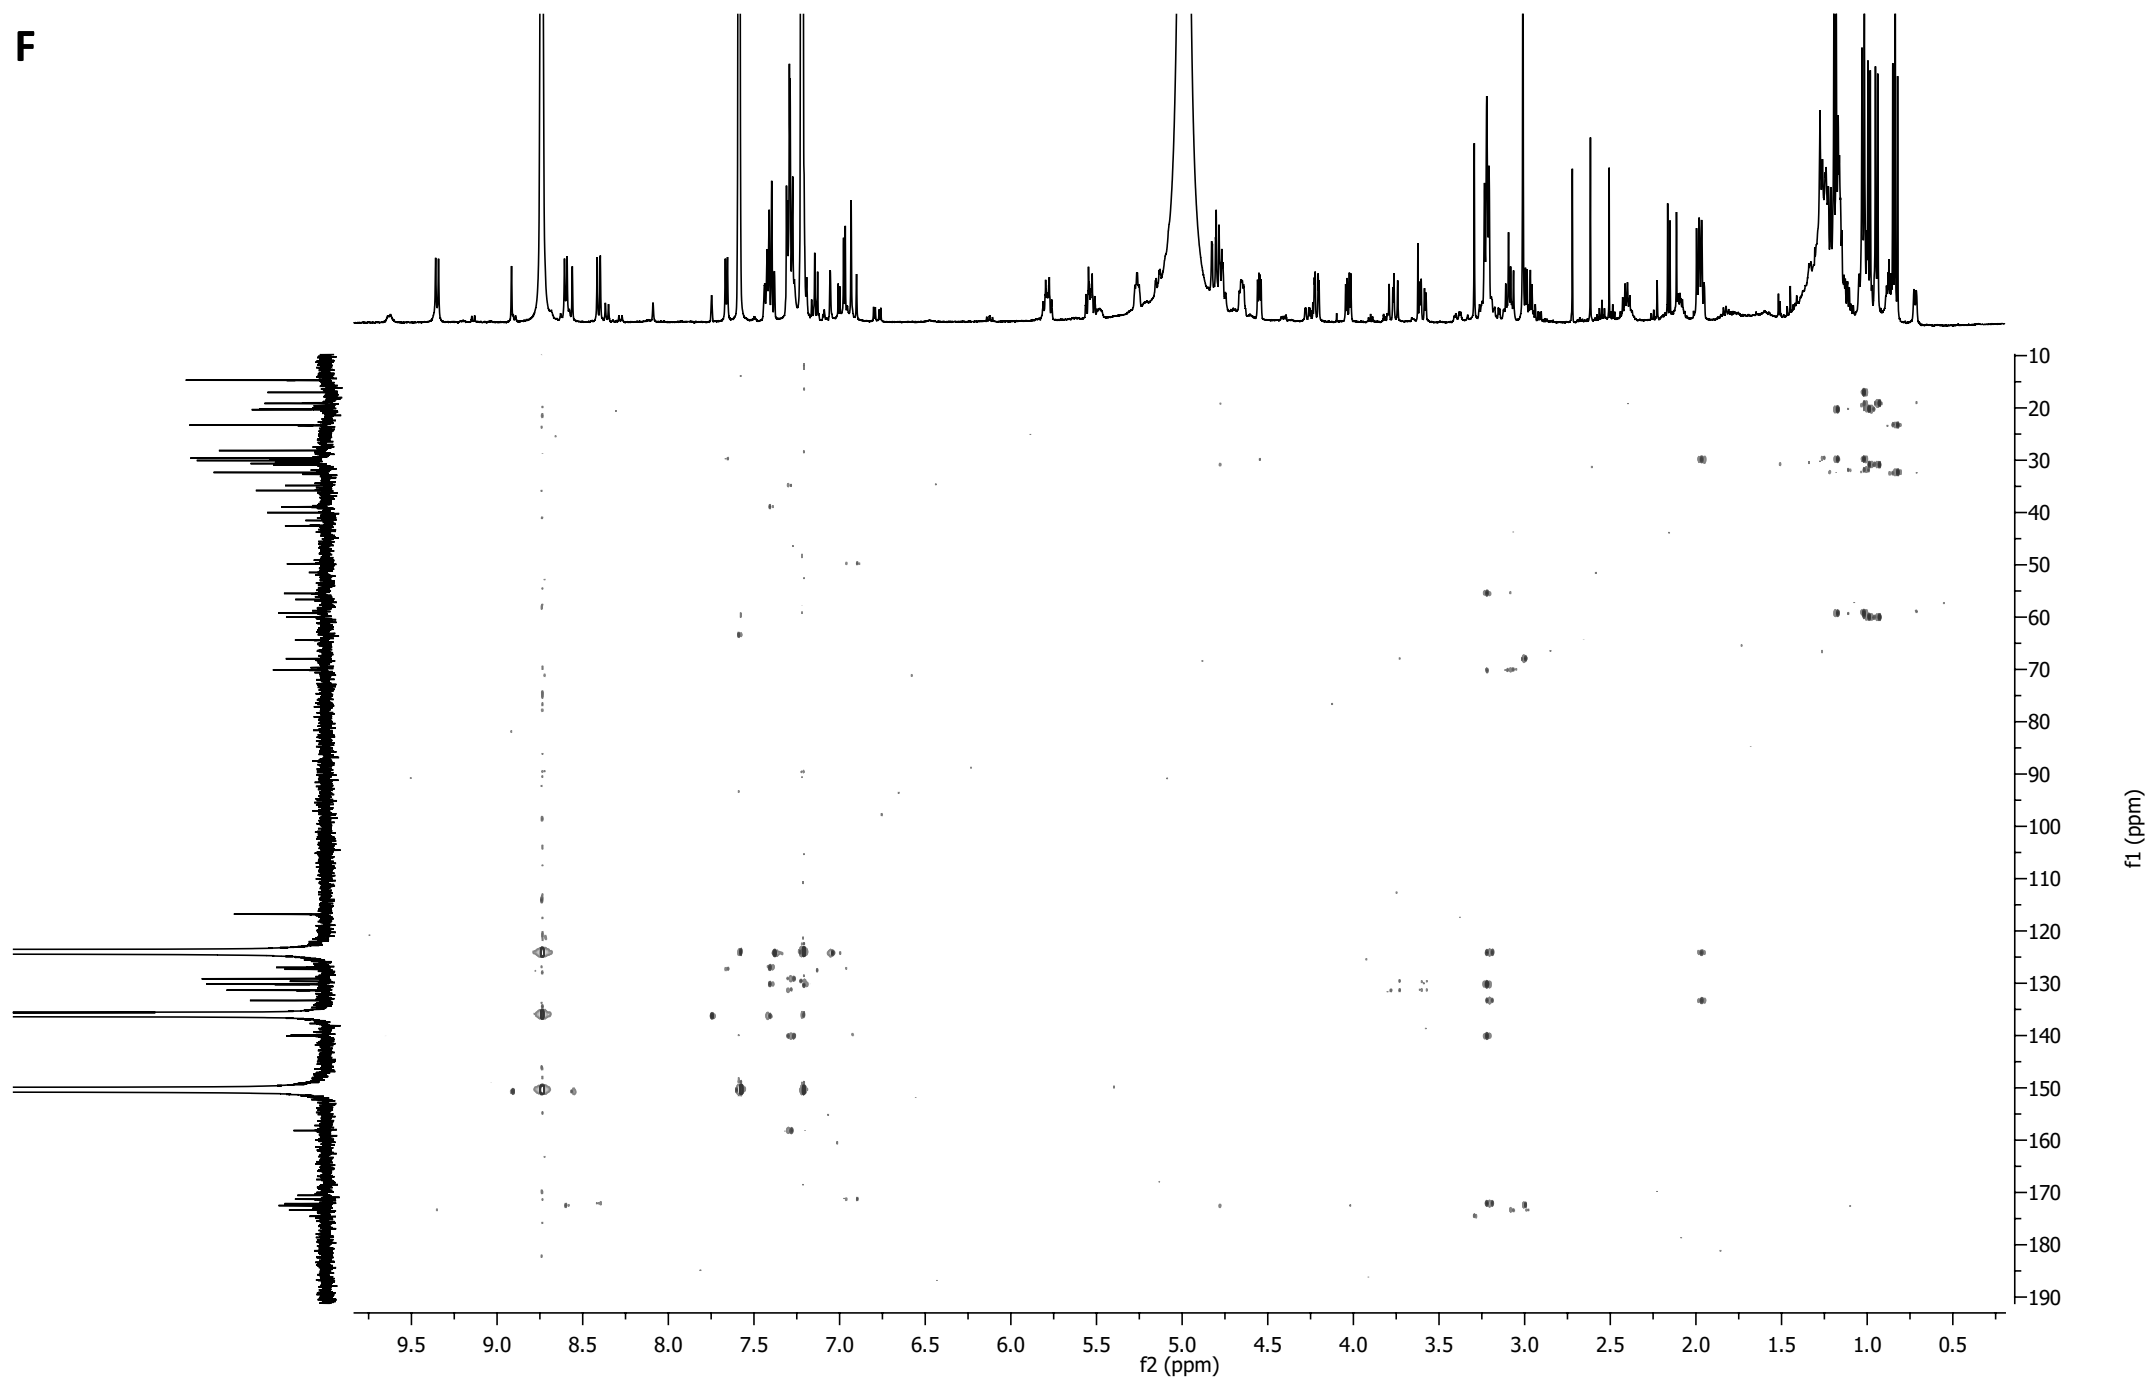

**Figure S11. Characterization of thalassospiramide D (14).** (F) HMQC spectrum in pyridine- $d_5$ .

G

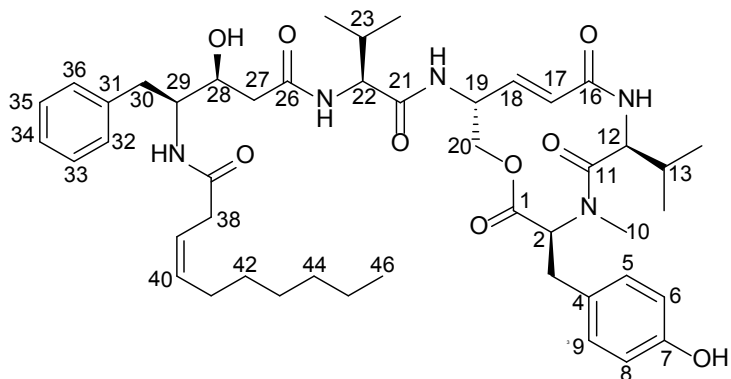NMR Spectral Data (500 MHz ( $^1\text{H}$ ), 125 MHz ( $^{13}\text{C}$ ) in pyridine- $d_5$ ) of thalassospiramide D (14)

| C/H   | $\delta_{\text{H}}$ | mult ( $J$ in Hz) | $\delta_{\text{C}}$ |                 | key HMBC |
|-------|---------------------|-------------------|---------------------|-----------------|----------|
| 1     |                     |                   | 170.6               | C               |          |
| 2     | 4.03                | dd (10.8, 4.4)    | 68.0                | CH              | 1        |
| 3a    | 3.59                | dd (14.0, 4.4)    | 34.8                | CH <sub>2</sub> |          |
| 3b    | 3.77                | dd (14.0, 11.0)   |                     |                 |          |
| 4     |                     |                   | 129.6               | C               |          |
| 5     | 7.30                | m                 | 131.3               | CH              | 7        |
| 6     | 7.22                | m                 | 116.8               | CH              | 4        |
| 7     |                     |                   | 158.2               | C               |          |
| 7-OH  |                     |                   |                     |                 |          |
| 8     | 7.22                | m                 | 116.8               | CH              | 4        |
| 9     | 7.30                | m                 | 131.3               | CH              | 7        |
| 10    | 3.01                | s                 | 40.0                | CH <sub>3</sub> | 2        |
| 11    |                     |                   | 172.4               |                 |          |
| 12    | 4.55                | dd (6.2, 4.0)     | 59.2                | CH              |          |
| 12-NH | 7.66                | dd (6.3)          |                     |                 |          |
| 13    | 2.09                | m                 | 29.8                | CH              |          |
| 14    | 1.02                | d (7.0)           | 20.3                | CH <sub>3</sub> |          |
| 15    | 1.19                | d (7.0)           | 17.0                | CH <sub>3</sub> |          |
| 16    |                     |                   | 171.3               | C               |          |
| 17    | 6.92                | d (15.8)          | 127.3               | CH              | 16       |
| 18    | 6.99                | dd (15.8, 5.0)    | 139.9               | CH              | 16       |
| 19    | 5.26                | m                 | 49.8                | CH              |          |
| 19-NH | 8.60                | d (7.5)           |                     |                 | 21       |
| 20a   | 4.21                | dd (11.3, 2.4)    | 64.4                | CH <sub>2</sub> |          |
| 20b   | 4.82                | dd (11.3, 2.0)    |                     |                 | 1        |
| 21    |                     |                   | 172.5               | C               |          |
| 22    | 4.77                | m                 | 60.0                | CH              |          |
| 22-NH | 9.35                | d (8.5)           |                     |                 | 26       |
| 23    | 2.41                | m                 | 30.7                | CH              | 21       |
| 24    | 0.95                | d (6.8)           | 20.2                | CH <sub>3</sub> | 22       |
| 25    | 0.99                | d (6.8)           | 19.1                | CH <sub>3</sub> | 22       |
| 26    |                     |                   | 173.4               | C               |          |
| 27a   | 2.99                | dd (14.5, 4.5)    | 42.5                | CH <sub>2</sub> |          |
| 27b   | 3.08                | dd (14.5, 8.3)    |                     |                 |          |
| 28    | 4.65                | m                 | 70.1                | CH              |          |

|       |      |                   |       |                 |    |
|-------|------|-------------------|-------|-----------------|----|
| 28-OH |      |                   |       |                 |    |
| 29    | 4.79 | m                 | 55.8  | CH              | 30 |
| 29-NH | 8.41 | d (9.1)           |       |                 | 37 |
| 30    | 3.22 | m                 | 38.9  | CH <sub>2</sub> |    |
| 31    |      |                   | 140.1 | C               |    |
| 32    | 7.40 | m                 | 130.2 | CH              |    |
| 33    | 7.28 | m                 | 129.2 | CH              | 31 |
| 34    | 7.42 | m                 | 130.2 | CH              |    |
| 35    | 7.28 | m                 | 129.2 | CH              |    |
| 36    | 7.40 | m                 | 130.2 | CH              |    |
| 37    |      |                   | 172.1 | C               |    |
| 38    | 3.21 | m                 | 35.8  | CH <sub>2</sub> | 37 |
| 39    | 5.79 | dt (11, 7.0, 1.5) | 123.8 | CH              |    |
| 40    | 5.54 | dt (11, 7.0, 2.0) | 133.3 | CH              |    |
| 41    | 1.98 | m                 | 28.2  | CH <sub>2</sub> |    |
| 42    | 1.27 | m                 | 30.1  | CH <sub>2</sub> |    |
| 43    | 1.17 | m                 | 29.6  | CH <sub>2</sub> |    |
| 44    | 1.15 | m                 | 32.3  | CH <sub>2</sub> |    |
| 45    | 1.22 | m                 | 23.3  | CH <sub>2</sub> |    |
| 46    | 0.84 | t (7.1)           | 14.7  | CH <sub>3</sub> |    |

**Figure S11. Characterization of thalassospiramide D (14). (G) NMR assignment.**

# A ESI-TOF-HRMS

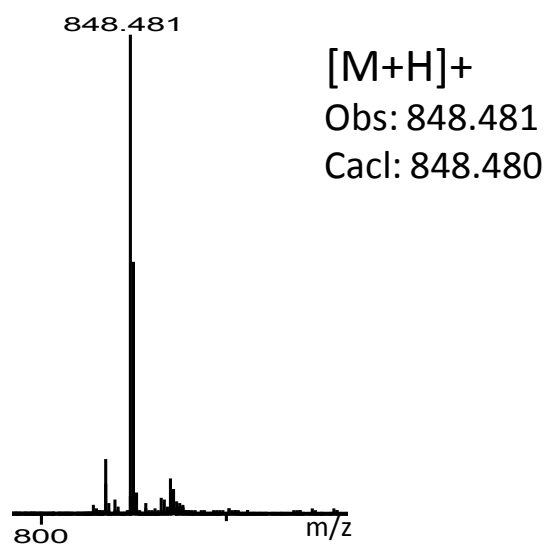

## ITMS<sup>2</sup> – 848 m/z (1+)

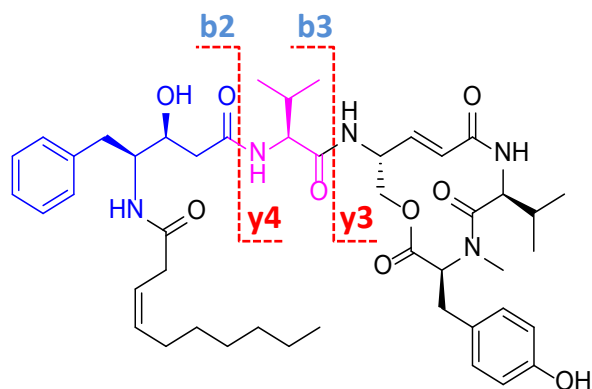

| species             | Obs. mass | Calc. mass | Error [Da] |
|---------------------|-----------|------------|------------|
| b1                  |           | 153.13     |            |
| b2                  |           | 360.22     |            |
| b2-H <sub>2</sub> O | 342.26    | 342.21     | -0.05      |
| b3                  | 459.33    | 459.29     | -0.04      |
| y3                  | 390.28    | 390.21     | -0.07      |
| y4                  | 489.24    | 489.27     | 0.03       |
| y5                  |           | 696.36     |            |

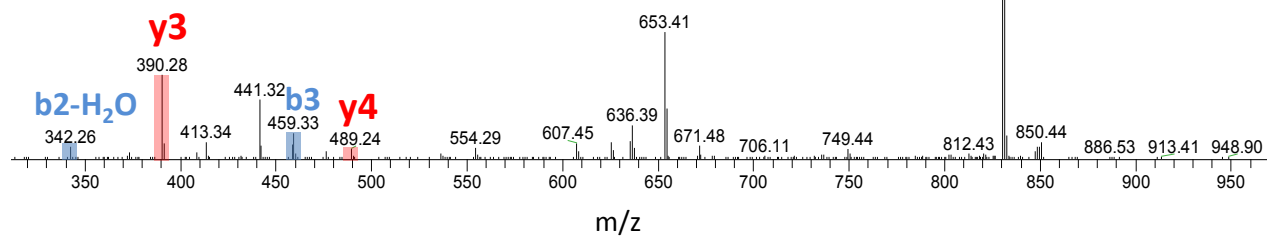

Figure S12. Characterization of thalassospiramide D1 (15). (A) MS<sup>n</sup> analysis.

# A ESI-TOF-HRMS

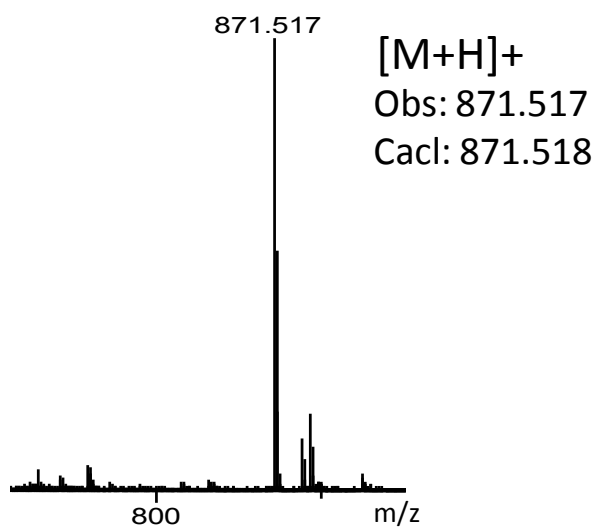

## ITMS<sup>2</sup> – 871 m/z (1+)

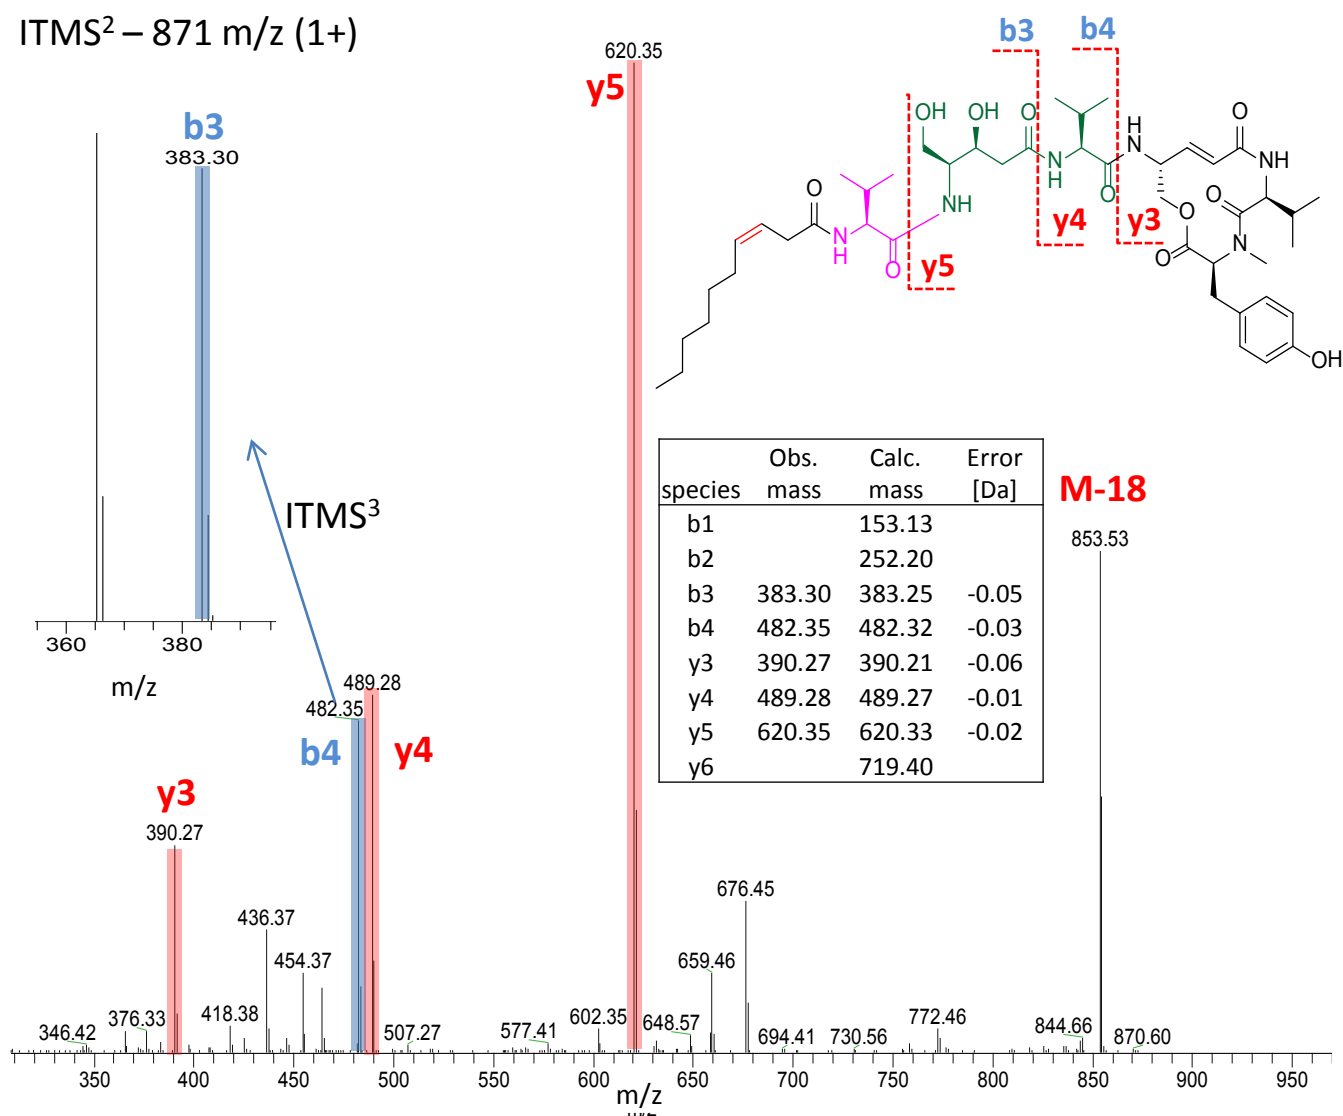

Figure S13. Characterization of thalassospiramide E (9). (A) MS<sup>n</sup> analysis.

**B**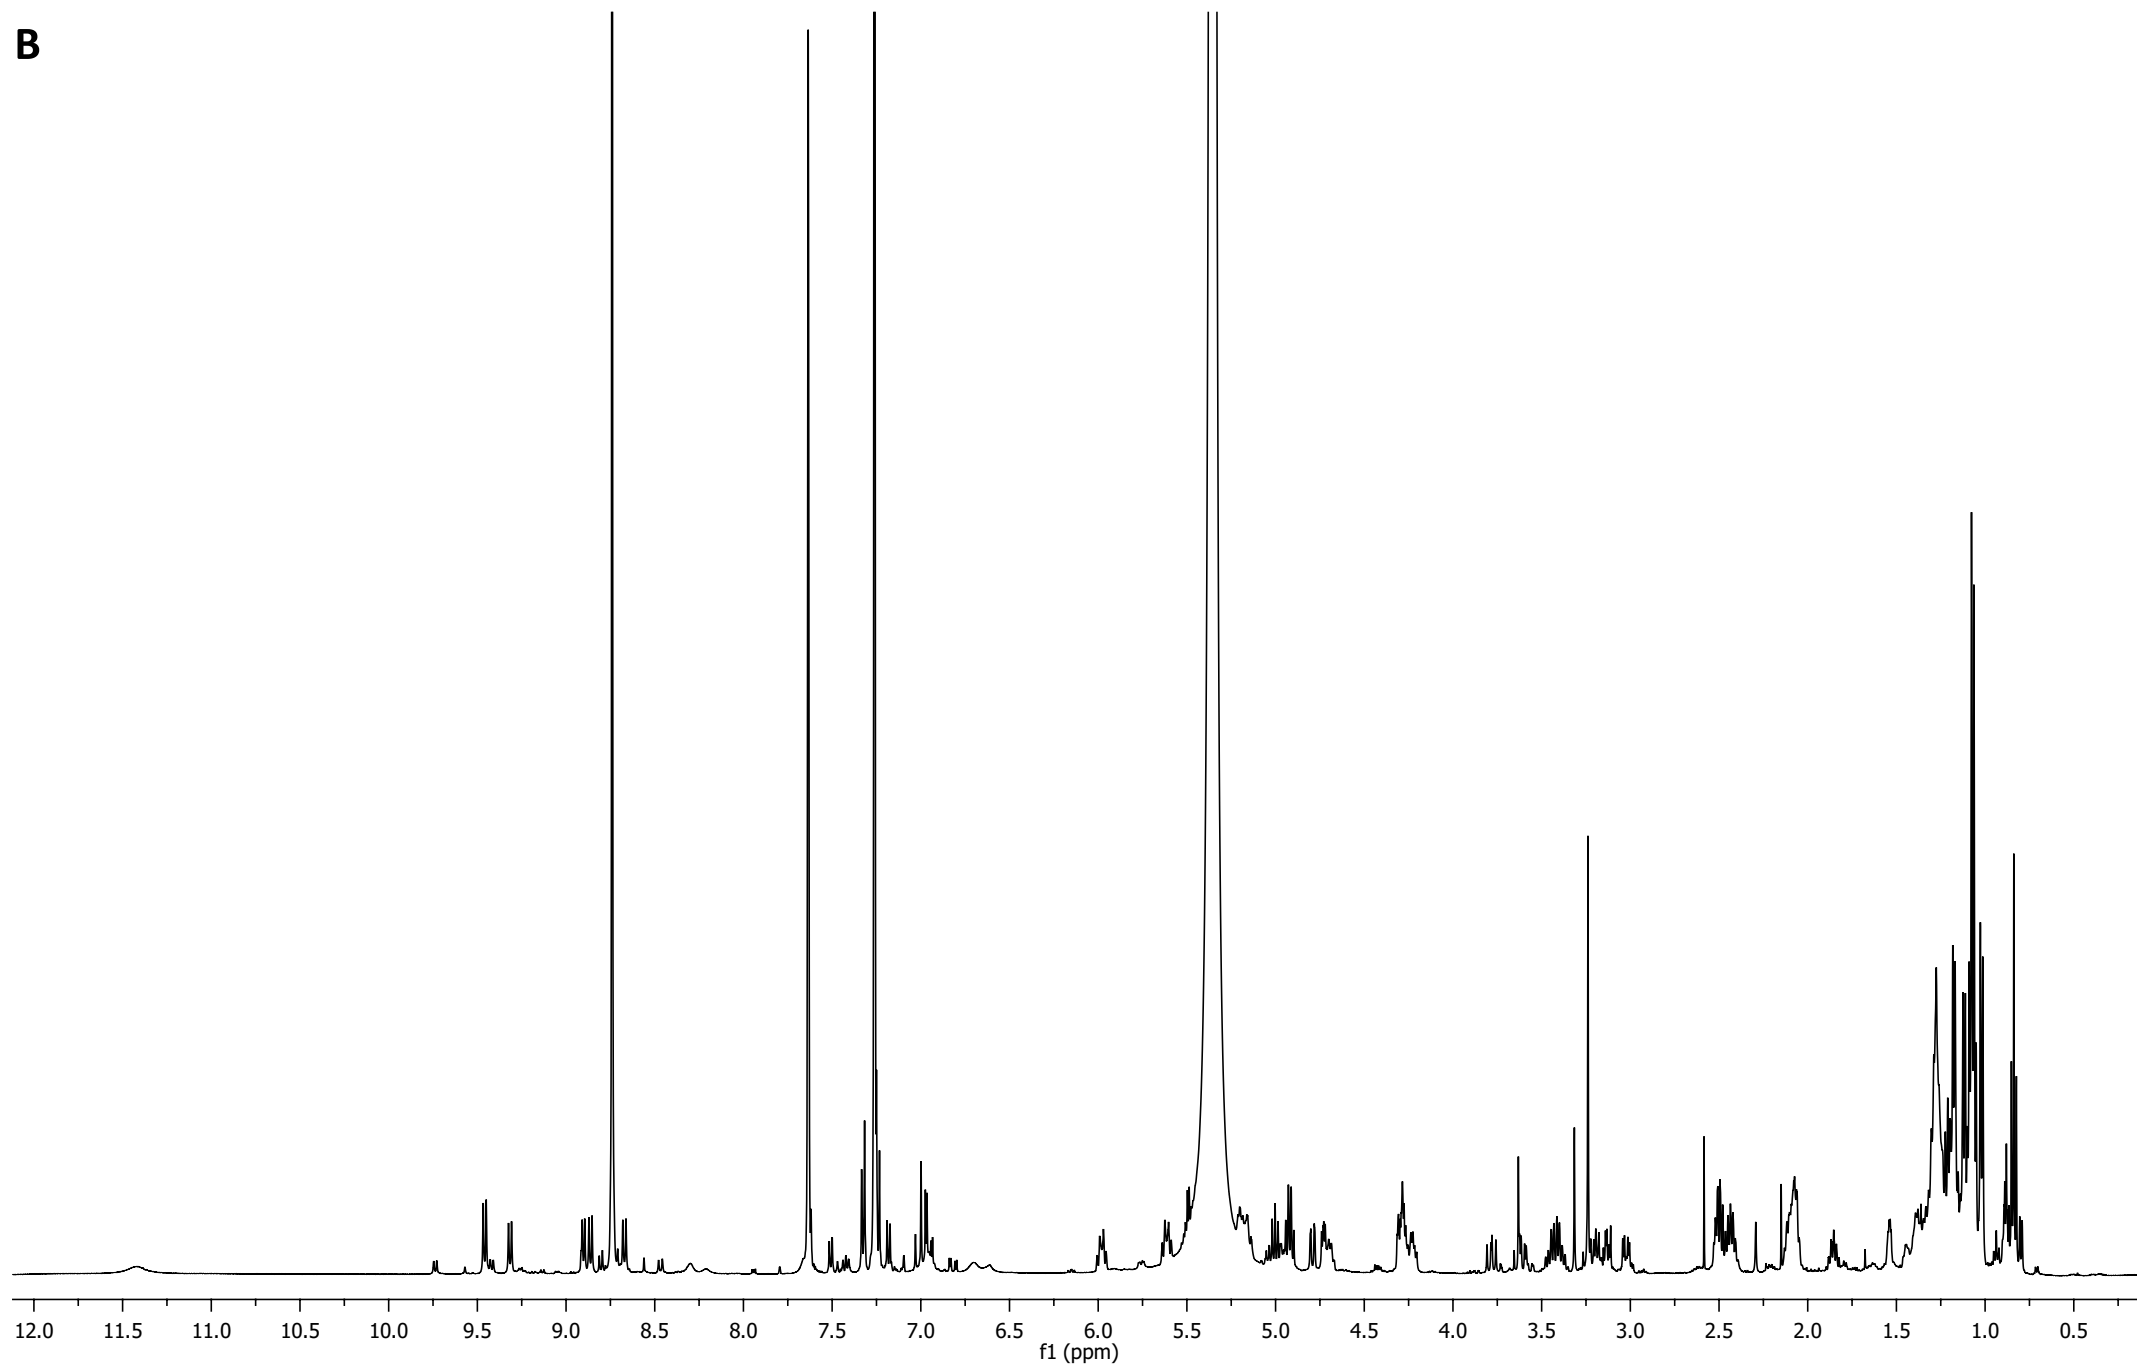

**Figure S13. Characterization of thalassospiramide E (9). (B)  $^1\text{H}$  spectrum in  $\text{pyridine-}d_5$ .**

**C**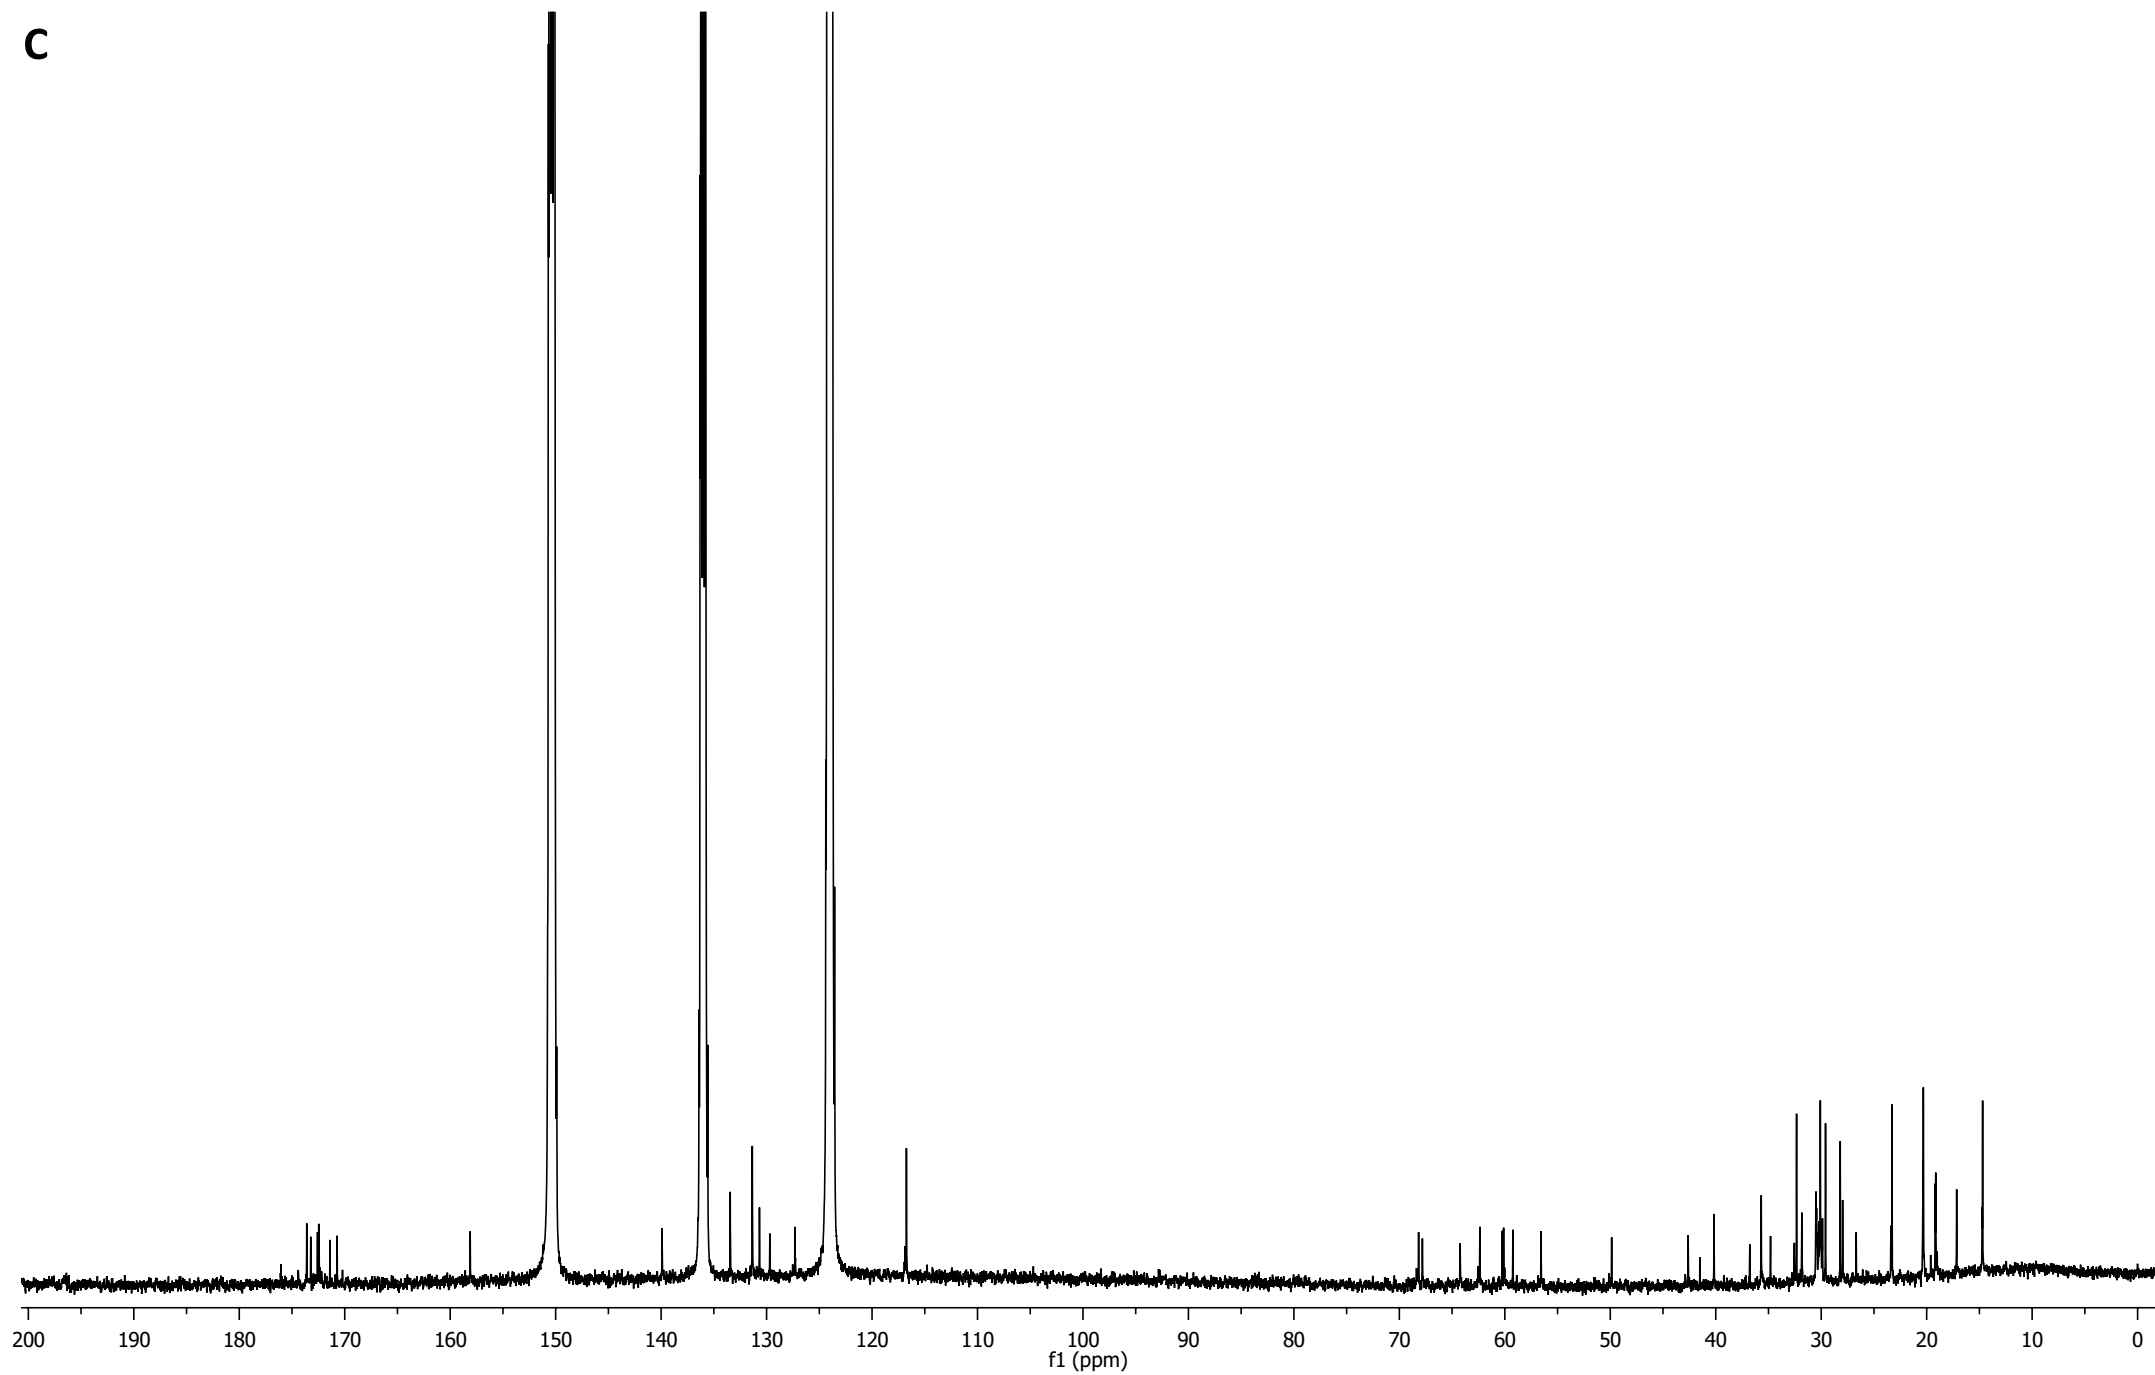

**Figure S13. Characterization of thalassospiramide E (9). (C)  $^{13}\text{C}$  spectrum in pyridine- $d_5$ .**



**D**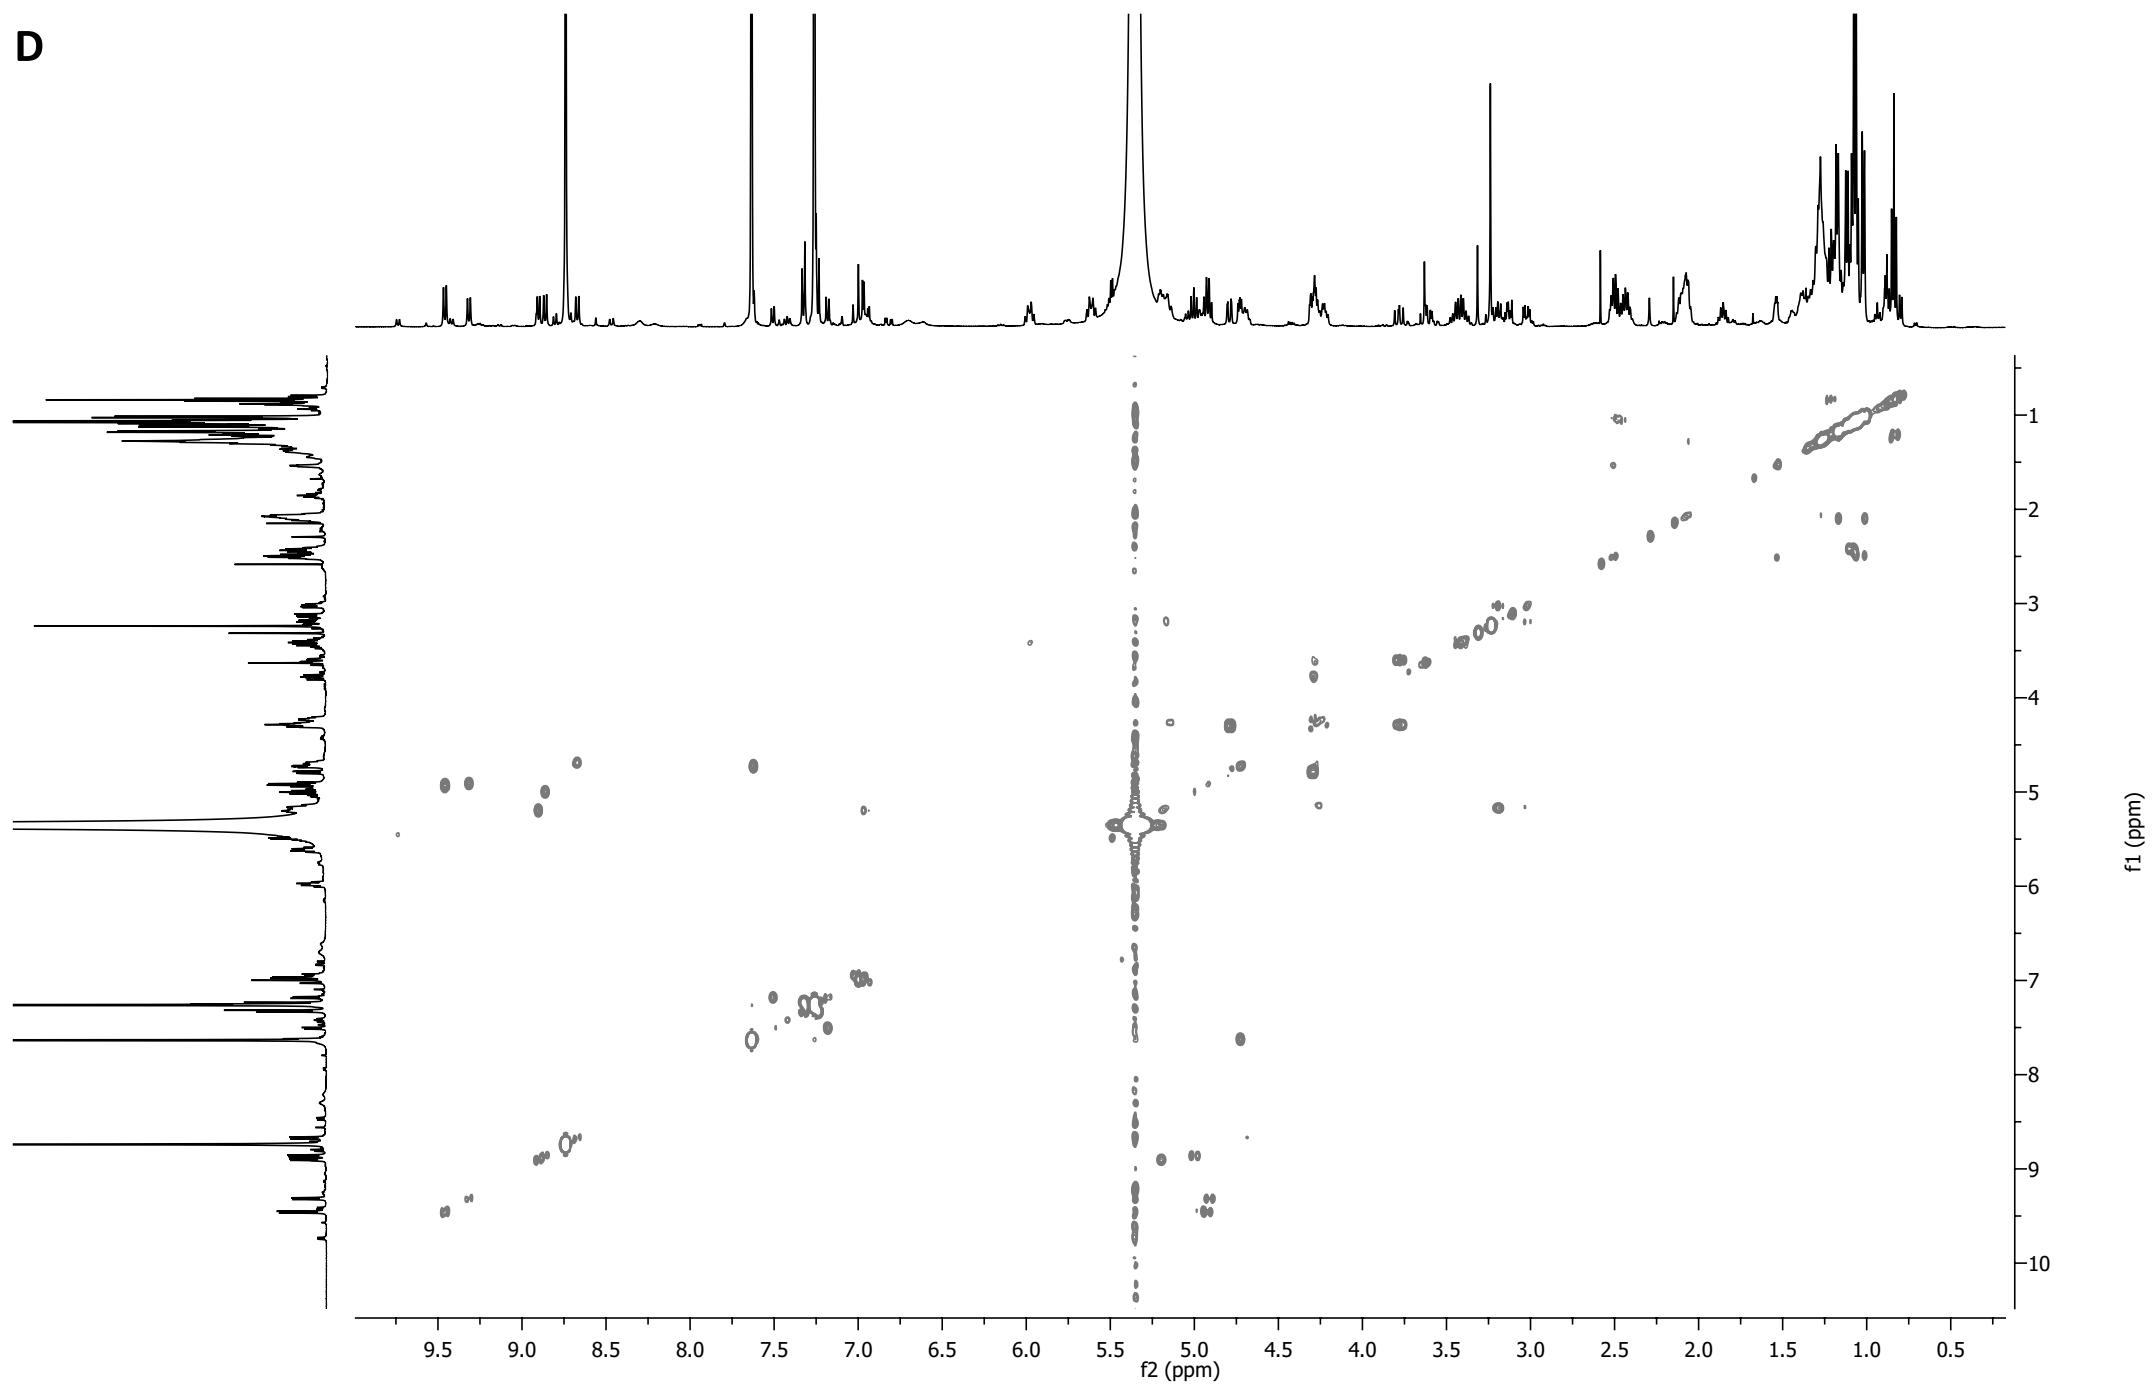

**Figure S13. Characterization of thalassospiramide E (9).** (D)  $^1\text{H}$ - $^1\text{H}$  COSY spectrum in pyridine- $d_5$ .

**E**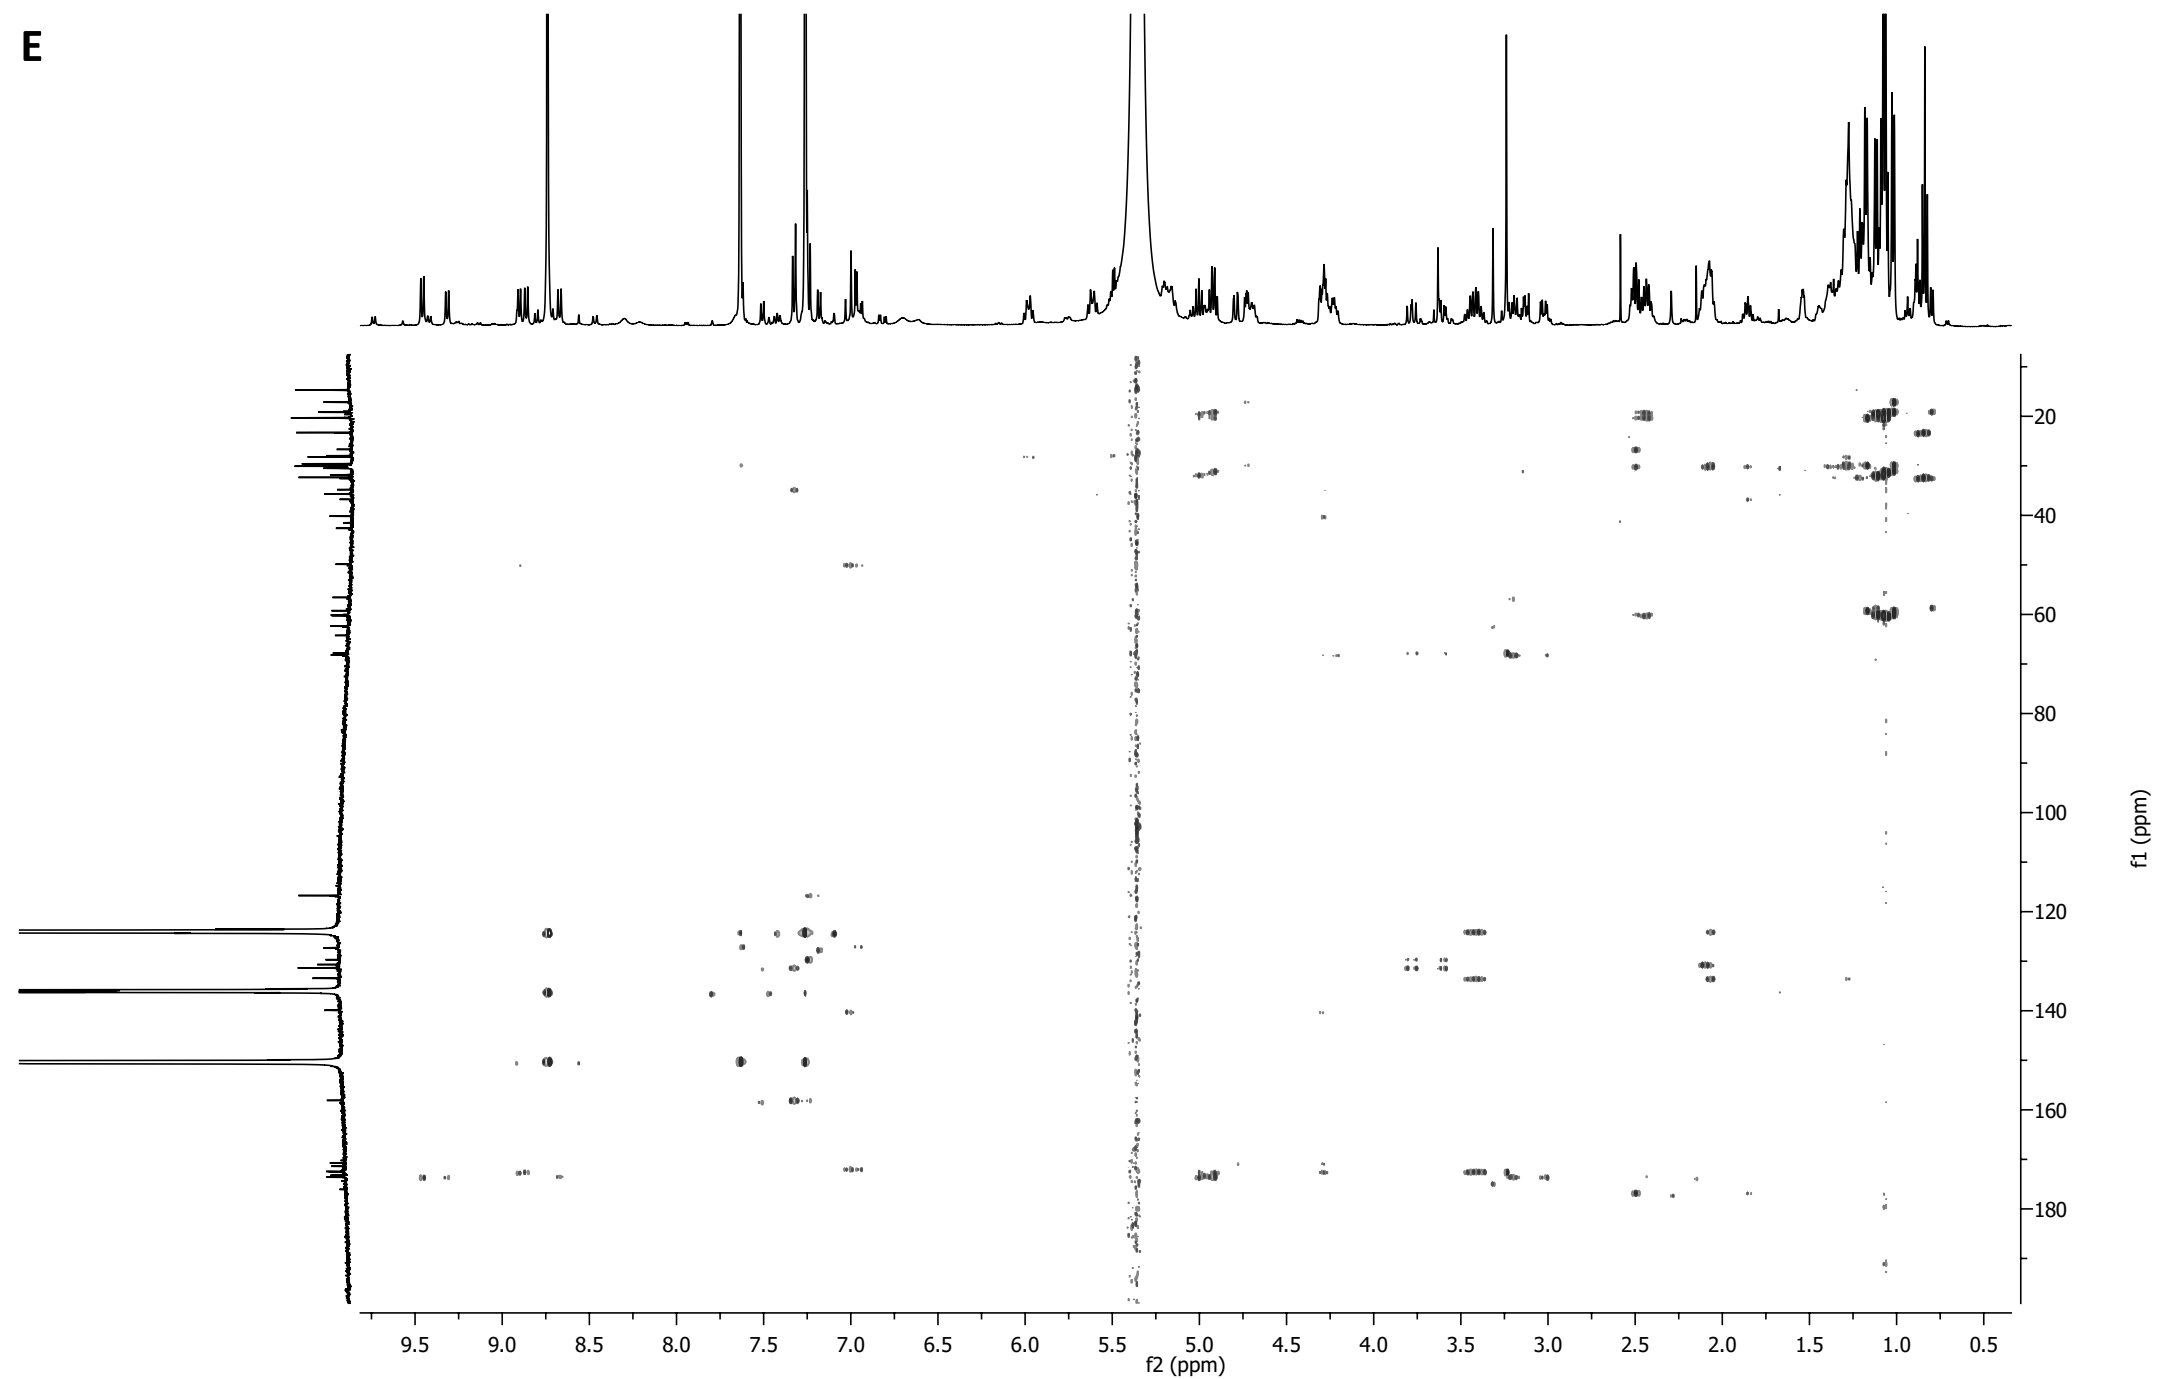

**Figure S13. Characterization of thalassospiramide E (9).** (E) HMQC spectrum in pyridine- $d_5$ .

F

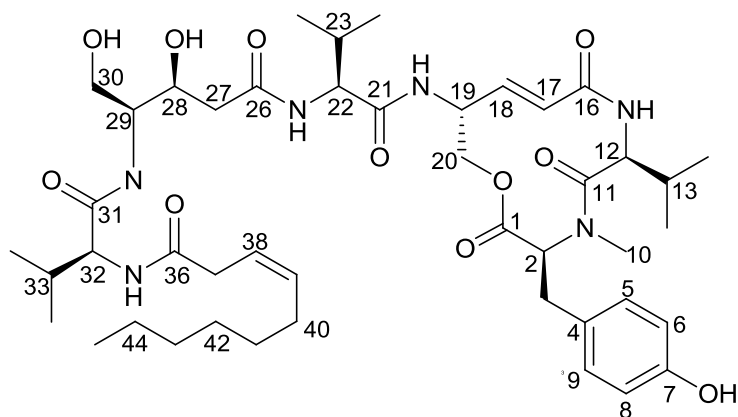NMR Spectral Data (500 MHz ( $^1\text{H}$ ), 125 MHz ( $^{13}\text{C}$ ) in pyridine- $d_5$ ) of thalassospiramide E (**9**)

| C/H   | $\delta_{\text{H}}$ | mult ( $J$ in Hz) | $\delta_{\text{C}}$ |                 | key HMBC |
|-------|---------------------|-------------------|---------------------|-----------------|----------|
| 1     |                     |                   | 170.7               | C               |          |
| 2     | 4.26                | m                 | 67.8                | CH              | 1, 10    |
| 3a    | 3.61                | dd (14.0, 4.5)    | 34.8                | CH <sub>2</sub> | 4        |
| 3b    | 3.79                | dd (14.0, 11.0)   |                     |                 | 4        |
| 4     |                     |                   | 129.7               | C               |          |
| 5     | 7.33                | d (8.4)           | 131.3               | CH              | 3        |
| 6     | 7.24                | d (8.4)           | 116.7               | CH              | 3        |
| 7     |                     |                   | 158.0               | C               |          |
| 7-OH  |                     |                   |                     |                 |          |
| 8     | 7.24                | d (8.4)           | 116.7               | CH              | 3        |
| 9     | 7.33                | d (8.4)           | 131.3               | CH              | 3        |
| 10    | 3.24                | s                 | 40                  | CH <sub>3</sub> | 2, 11    |
| 11    |                     |                   | 172.5               |                 |          |
| 12    | 4.73                | dd (6.0, 4.1)     | 59.2                | CH              |          |
| 12-NH | 7.62                |                   |                     |                 | 16       |
| 13    | 2.09                | m                 | 29.8                | CH              |          |
| 14    | 1.02                | d (6.8)           | 20.2                | CH <sub>3</sub> |          |
| 15    | 1.18                | d (6.8)           | 17.0                | CH <sub>3</sub> |          |
| 16    |                     |                   | 171.4               | C               |          |
| 17    | 7.01                | d (15.8)          | 127.3               | CH              | 16, 19   |
| 18    | 6.95                | dd (15.7, 4.7)    | 139.9               | CH              | 16       |
| 19    | 5.18                | m                 | 49.8                | CH              |          |
| 19-NH | 8.90                | d (7.2)           |                     |                 | 21       |
| 20a   | 4.79                | dd (11.0, 1.5)    | 64.2                | CH <sub>2</sub> | 1        |
| 20b   | 4.31                | m                 |                     |                 | 1        |
| 21    |                     |                   | 172.5               | C               |          |
| 22    | 4.92                | dd (6.0, 4.1)     | 60.2                | CH              |          |
| 22-NH | 9.46                | d (8.5)           |                     |                 | 21, 26   |
| 23    | 2.44                | m                 | 30.3                | CH              | 21       |
| 24    | 1.07                | d (7.0)           | 20.3                | CH <sub>3</sub> |          |
| 25    | 1.12                | d (7.0)           | 19.2                | CH <sub>3</sub> |          |
| 26    |                     |                   | 173.6               | C               |          |
| 27a   | 3.19                | dd (14.0, 5.2)    | 42.6                | CH <sub>2</sub> |          |
| 27b   | 3.03                | dd (14.0, 8.5)    |                     |                 |          |
| 28    | 5.18                | m                 | 68.2                | CH              |          |
| 28-OH |                     |                   |                     |                 |          |
| 29    | 4.69                | m                 | 56.6                | CH              | 30       |

|       |      |                     |       |                 |  |        |
|-------|------|---------------------|-------|-----------------|--|--------|
| 29-NH | 8.68 | d (8.9)             |       |                 |  | 31     |
| 30a   | 4.20 | m                   | 62.4  | CH <sub>2</sub> |  |        |
| 30b   | 4.30 | m                   |       |                 |  |        |
| 30-OH |      |                     |       |                 |  |        |
| 31    |      |                     | 173.6 | C               |  |        |
| 32    | 5.01 | m                   | 60.1  | CH              |  |        |
| 32-NH | 8.86 | d (8.7)             |       |                 |  | 31, 36 |
| 33    | 2.51 | m                   | 32.2  | CH              |  |        |
| 34    | 1.02 | d (6.7)             | 19.2  | CH <sub>3</sub> |  |        |
| 35    | 1.05 | d (6.5)             | 20.2  | CH <sub>3</sub> |  |        |
| 36    |      |                     | 172.5 | C               |  |        |
| 37    | 3.42 | m                   | 31.8  | CH <sub>2</sub> |  |        |
| 38    | 5.98 | dt (11.0, 7.5, 2.0) | 123.5 | CH              |  |        |
| 39    | 5.61 | dt (11.0, 7.5, 1.5) | 133.4 | CH              |  |        |
| 40    | 2.07 | m                   | 28.2  | CH <sub>2</sub> |  |        |
| 41    | 1.27 | m                   | 29.9  | CH <sub>2</sub> |  |        |
| 42    | 1.17 | m                   | 29.6  | CH <sub>2</sub> |  |        |
| 43    | 1.30 | m                   | 30.5  | CH <sub>2</sub> |  |        |
| 44    | 1.22 | m                   | 23.3  | CH <sub>2</sub> |  |        |
| 45    | 0.84 | t (7.0)             | 14.7  | CH <sub>3</sub> |  |        |

**Figure S13. Characterization of thalassospiramide E (9). (F) NMR assignment.**

# A ESI-TOF-HRMS

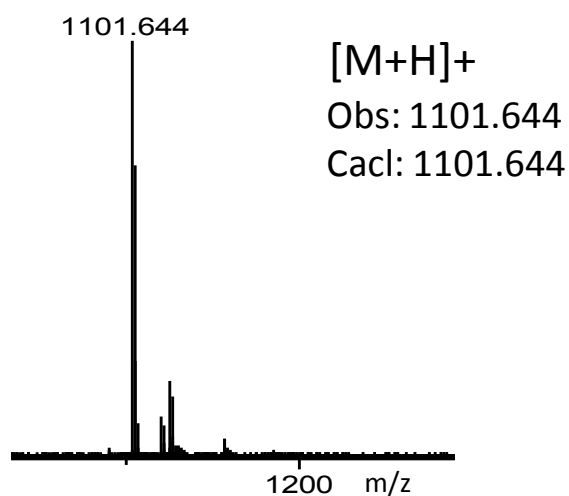

## ITMS<sup>2</sup> – 1101 m/z (1+)

| species             | Obs. mass | Calc. mass | Error [Da] |
|---------------------|-----------|------------|------------|
| b1                  |           | 153.13     |            |
| b2                  |           | 252.20     |            |
| b3                  |           | 383.25     |            |
| b4                  | 482.48    | 482.32     | -0.16      |
| b5                  |           | 613.38     |            |
| b5-H <sub>2</sub> O | 595.48    | 595.37     | -0.11      |
| b6                  | 712.49    | 712.45     | -0.04      |
| y3                  | 390.24    | 390.21     | -0.03      |
| y4                  | 489.24    | 489.27     | 0.03       |
| y5                  | 620.30    | 620.33     | 0.03       |
| y6                  | 719.45    | 719.40     | -0.05      |
| y7                  | 850.46    | 850.46     | 0.00       |
| y8                  |           | 949.52     |            |

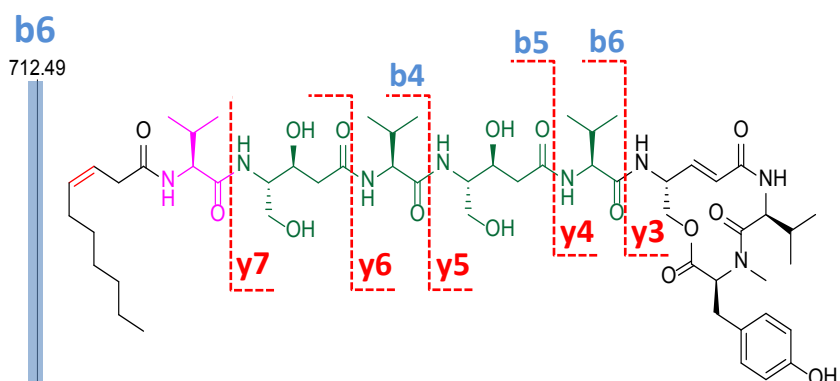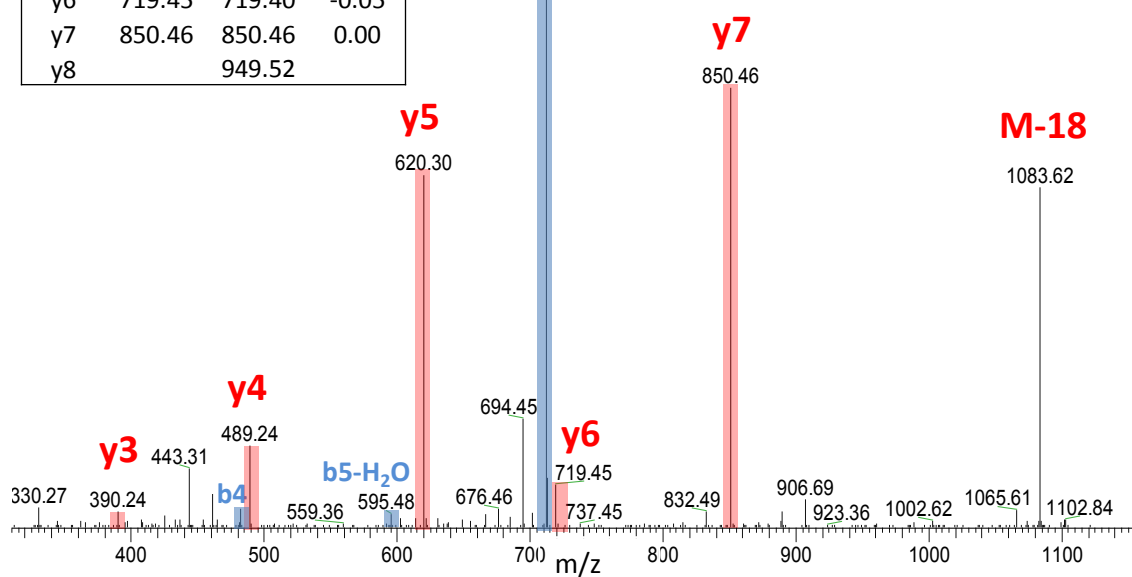

Figure S14. Characterization of thalassospiramide E1 (10). (A) MS<sup>n</sup> analysis.

# A ESI-TOF-HRMS

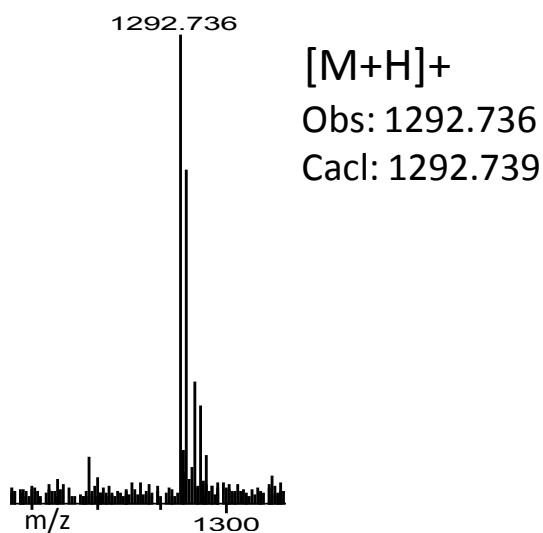

ITMS<sup>2</sup> – 1293 m/z (1+)

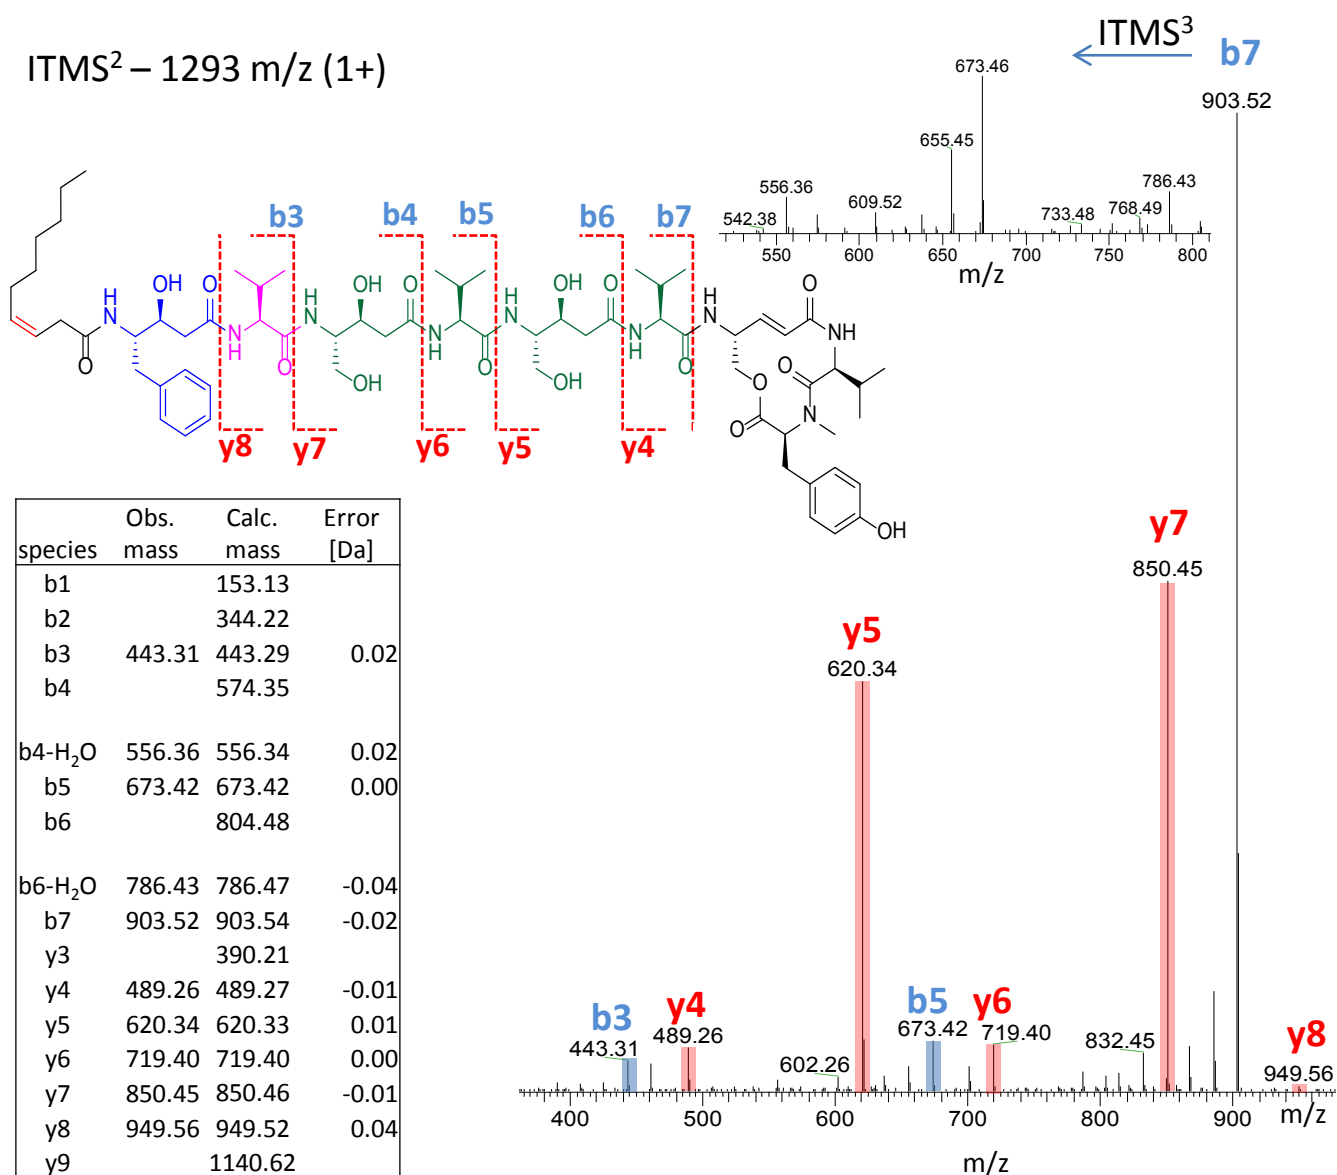

Figure S15. Characterization of thalassospiramide F (16). (A) MS<sup>n</sup> analysis.

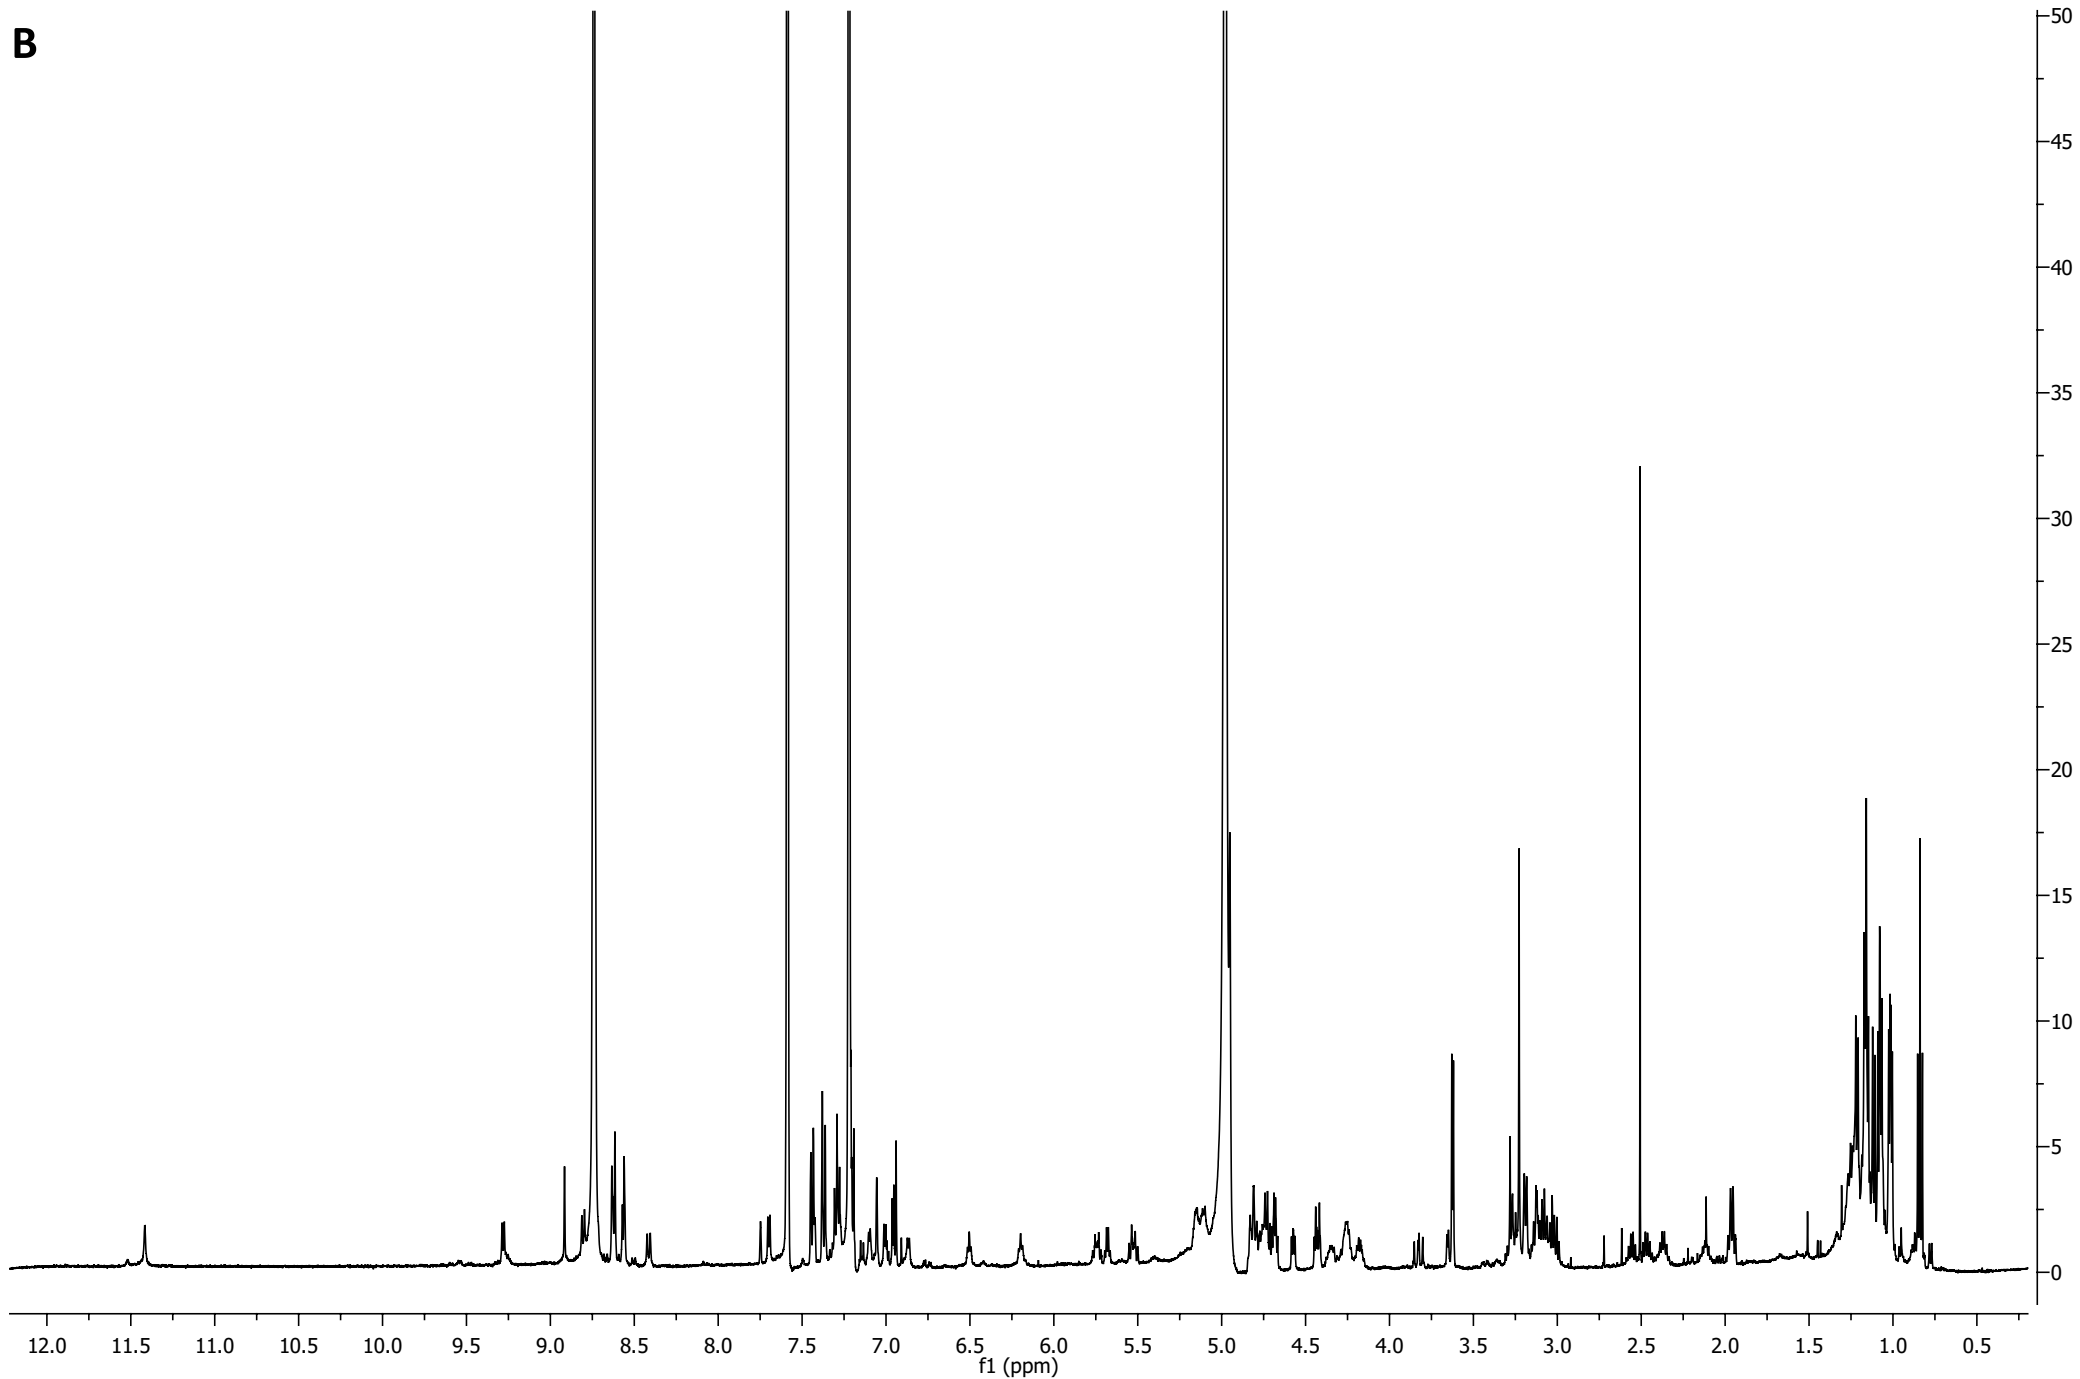

**Figure S15. Characterization of thalassospiramide F. (B)  $^1\text{H}$  spectrum in  $\text{pyridine-}d_5$ .**

**C**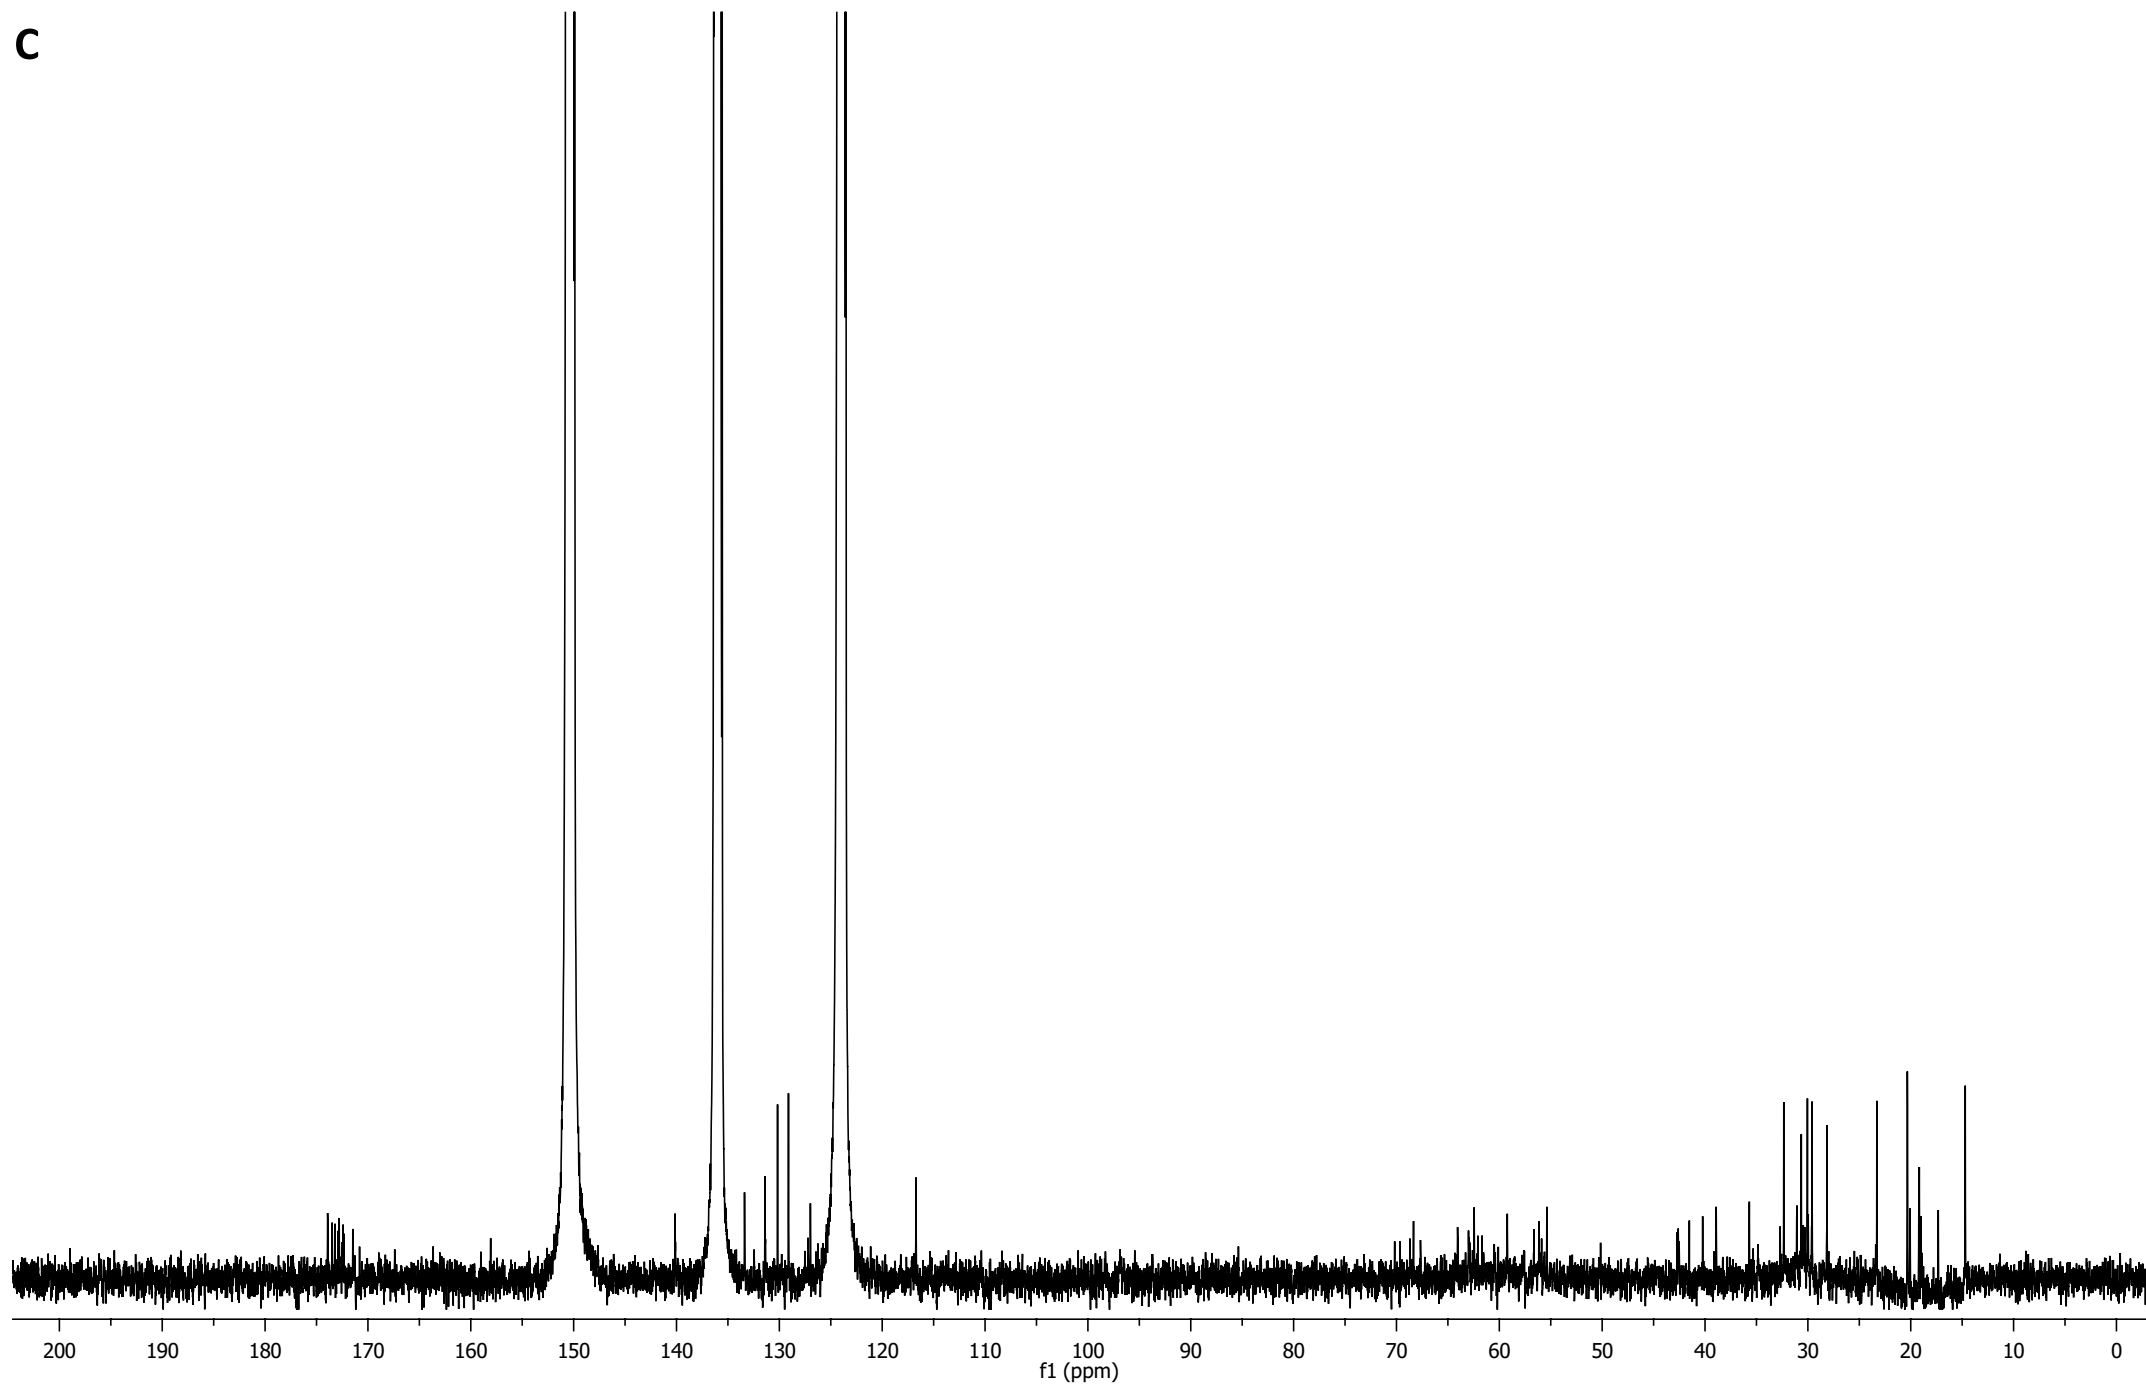

**Figure S15. Characterization of thalassospiramide F (16). (C)  $^{13}\text{C}$  spectrum in pyridine- $d_5$ .**



**D**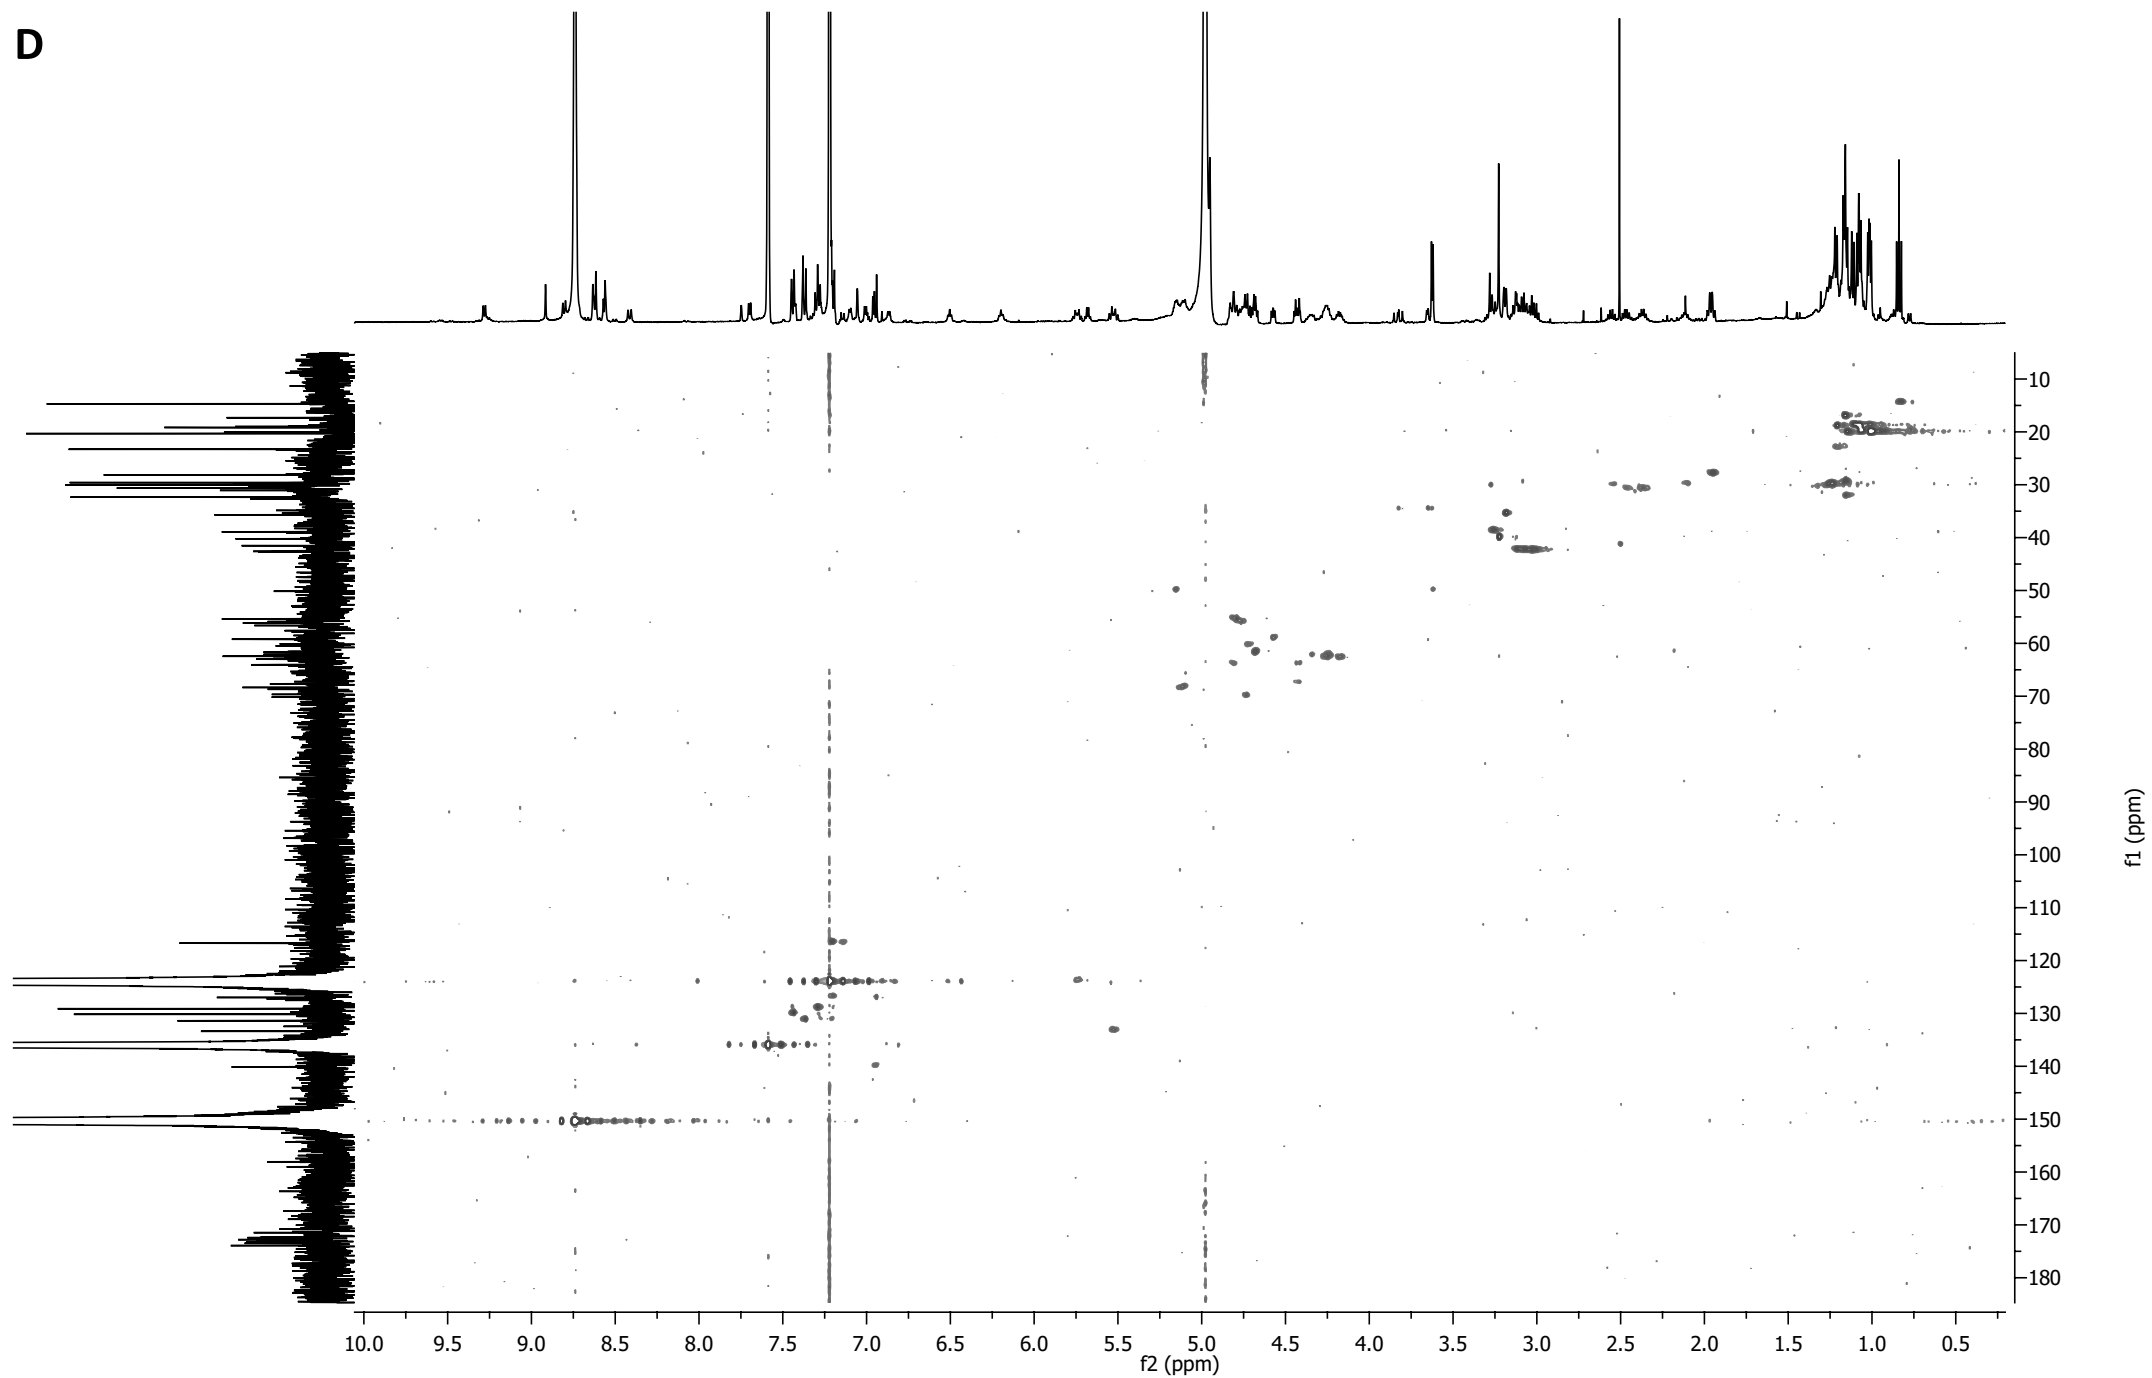

**Figure S15. Characterization of thalassospiramide F (16).** (D) HMQC spectrum in pyridine- $d_5$ .

**E**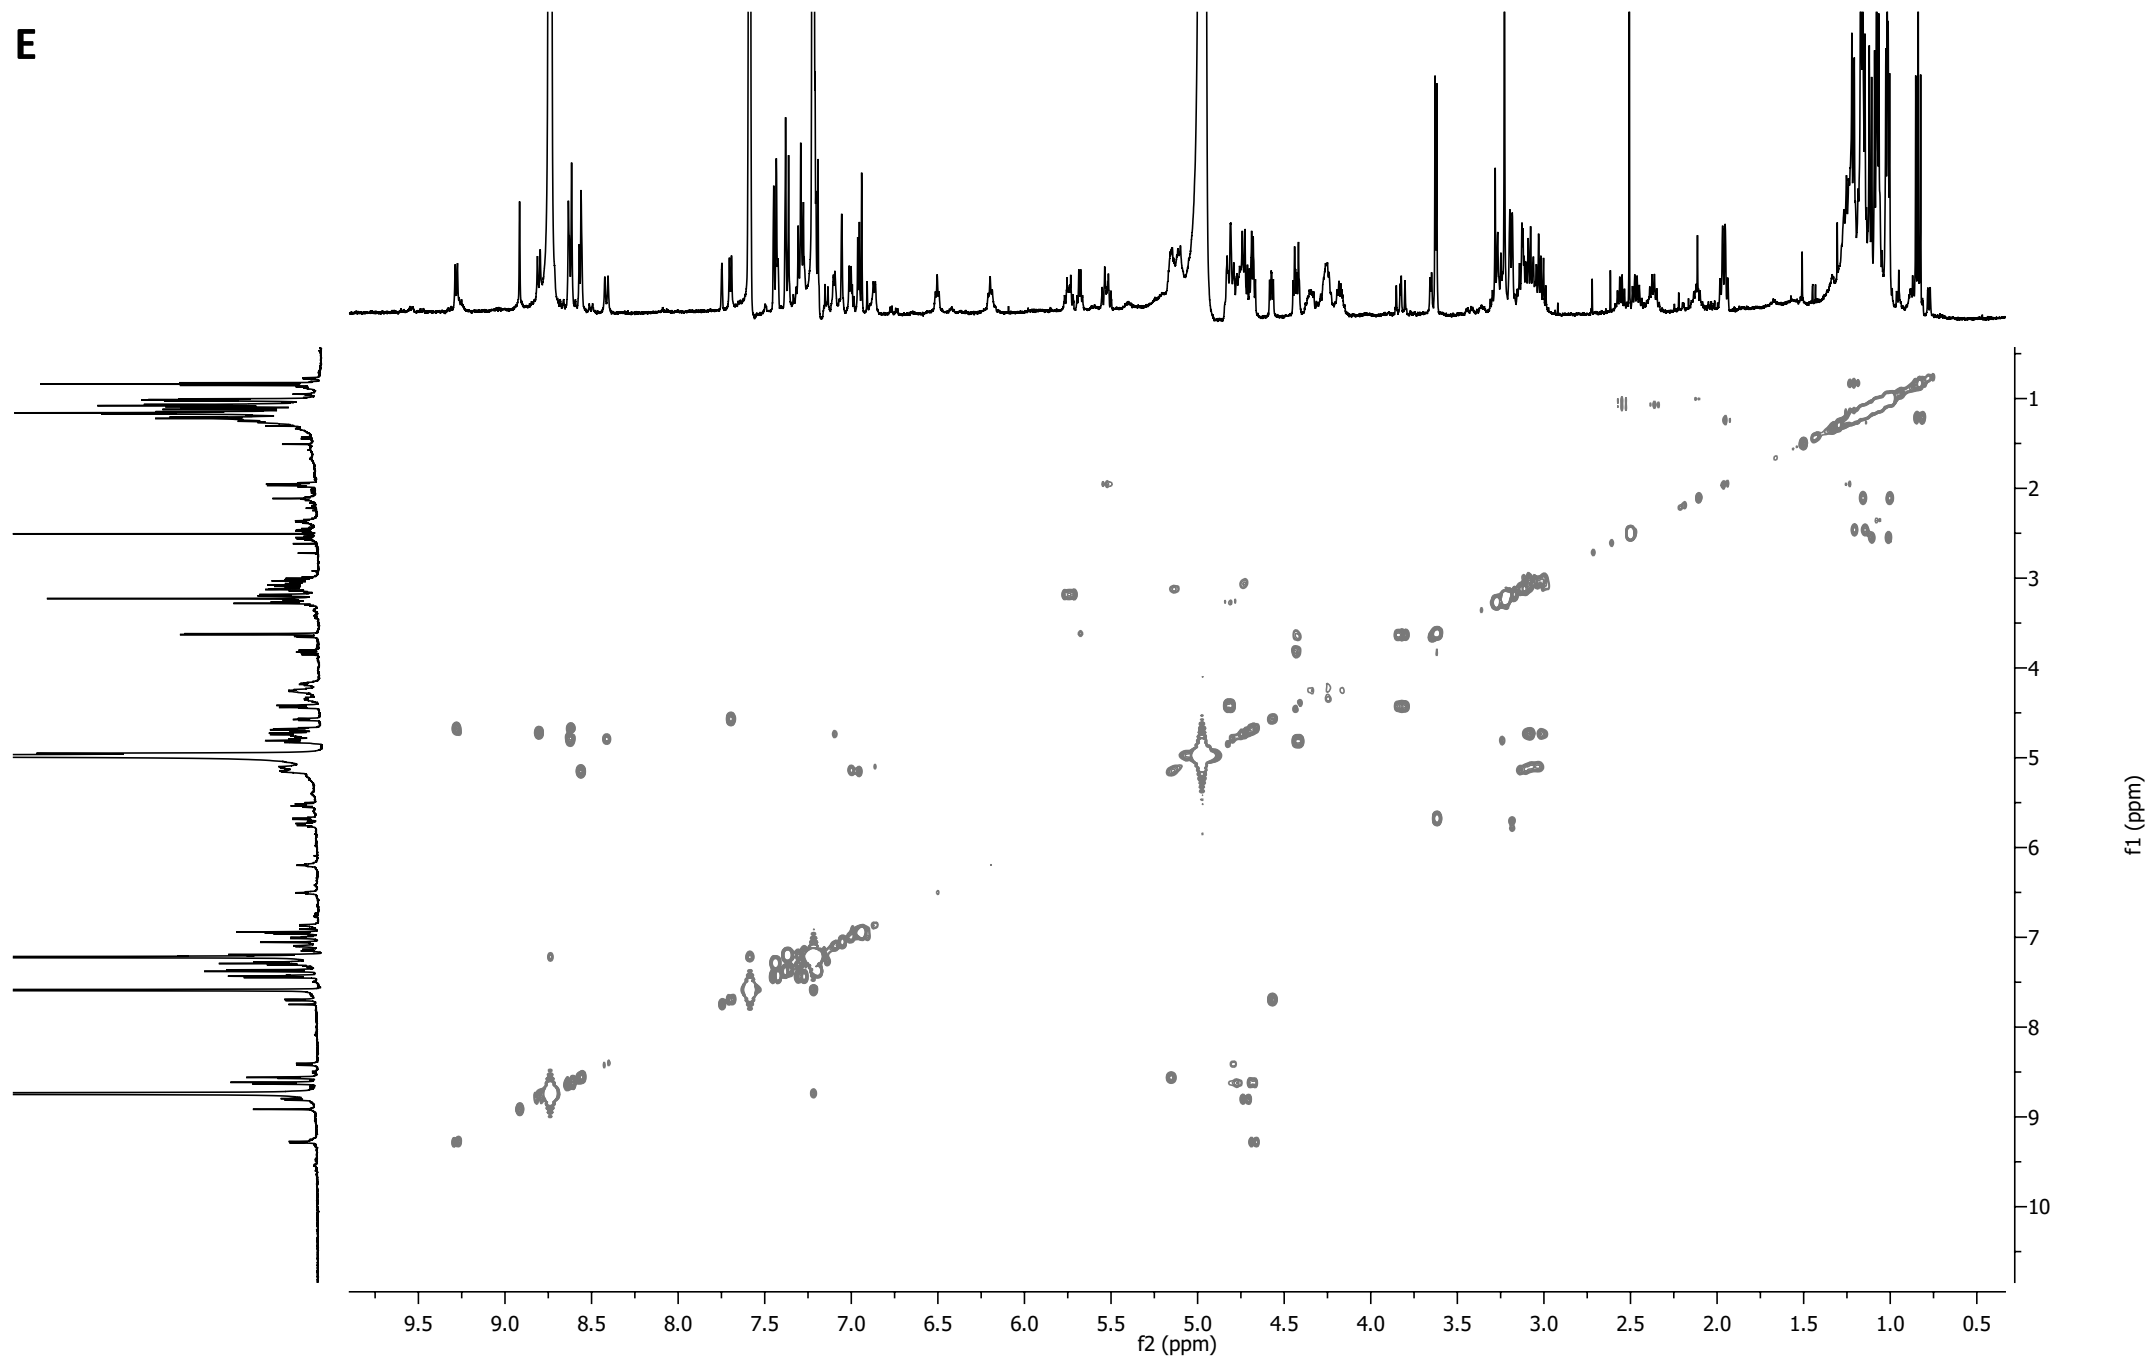

**Figure S15. Characterization of thalassospiramide F (16).** (E)  $^1\text{H}$ - $^1\text{H}$  COSY spectrum in  $\text{pyridine-}d_5$ .

**F**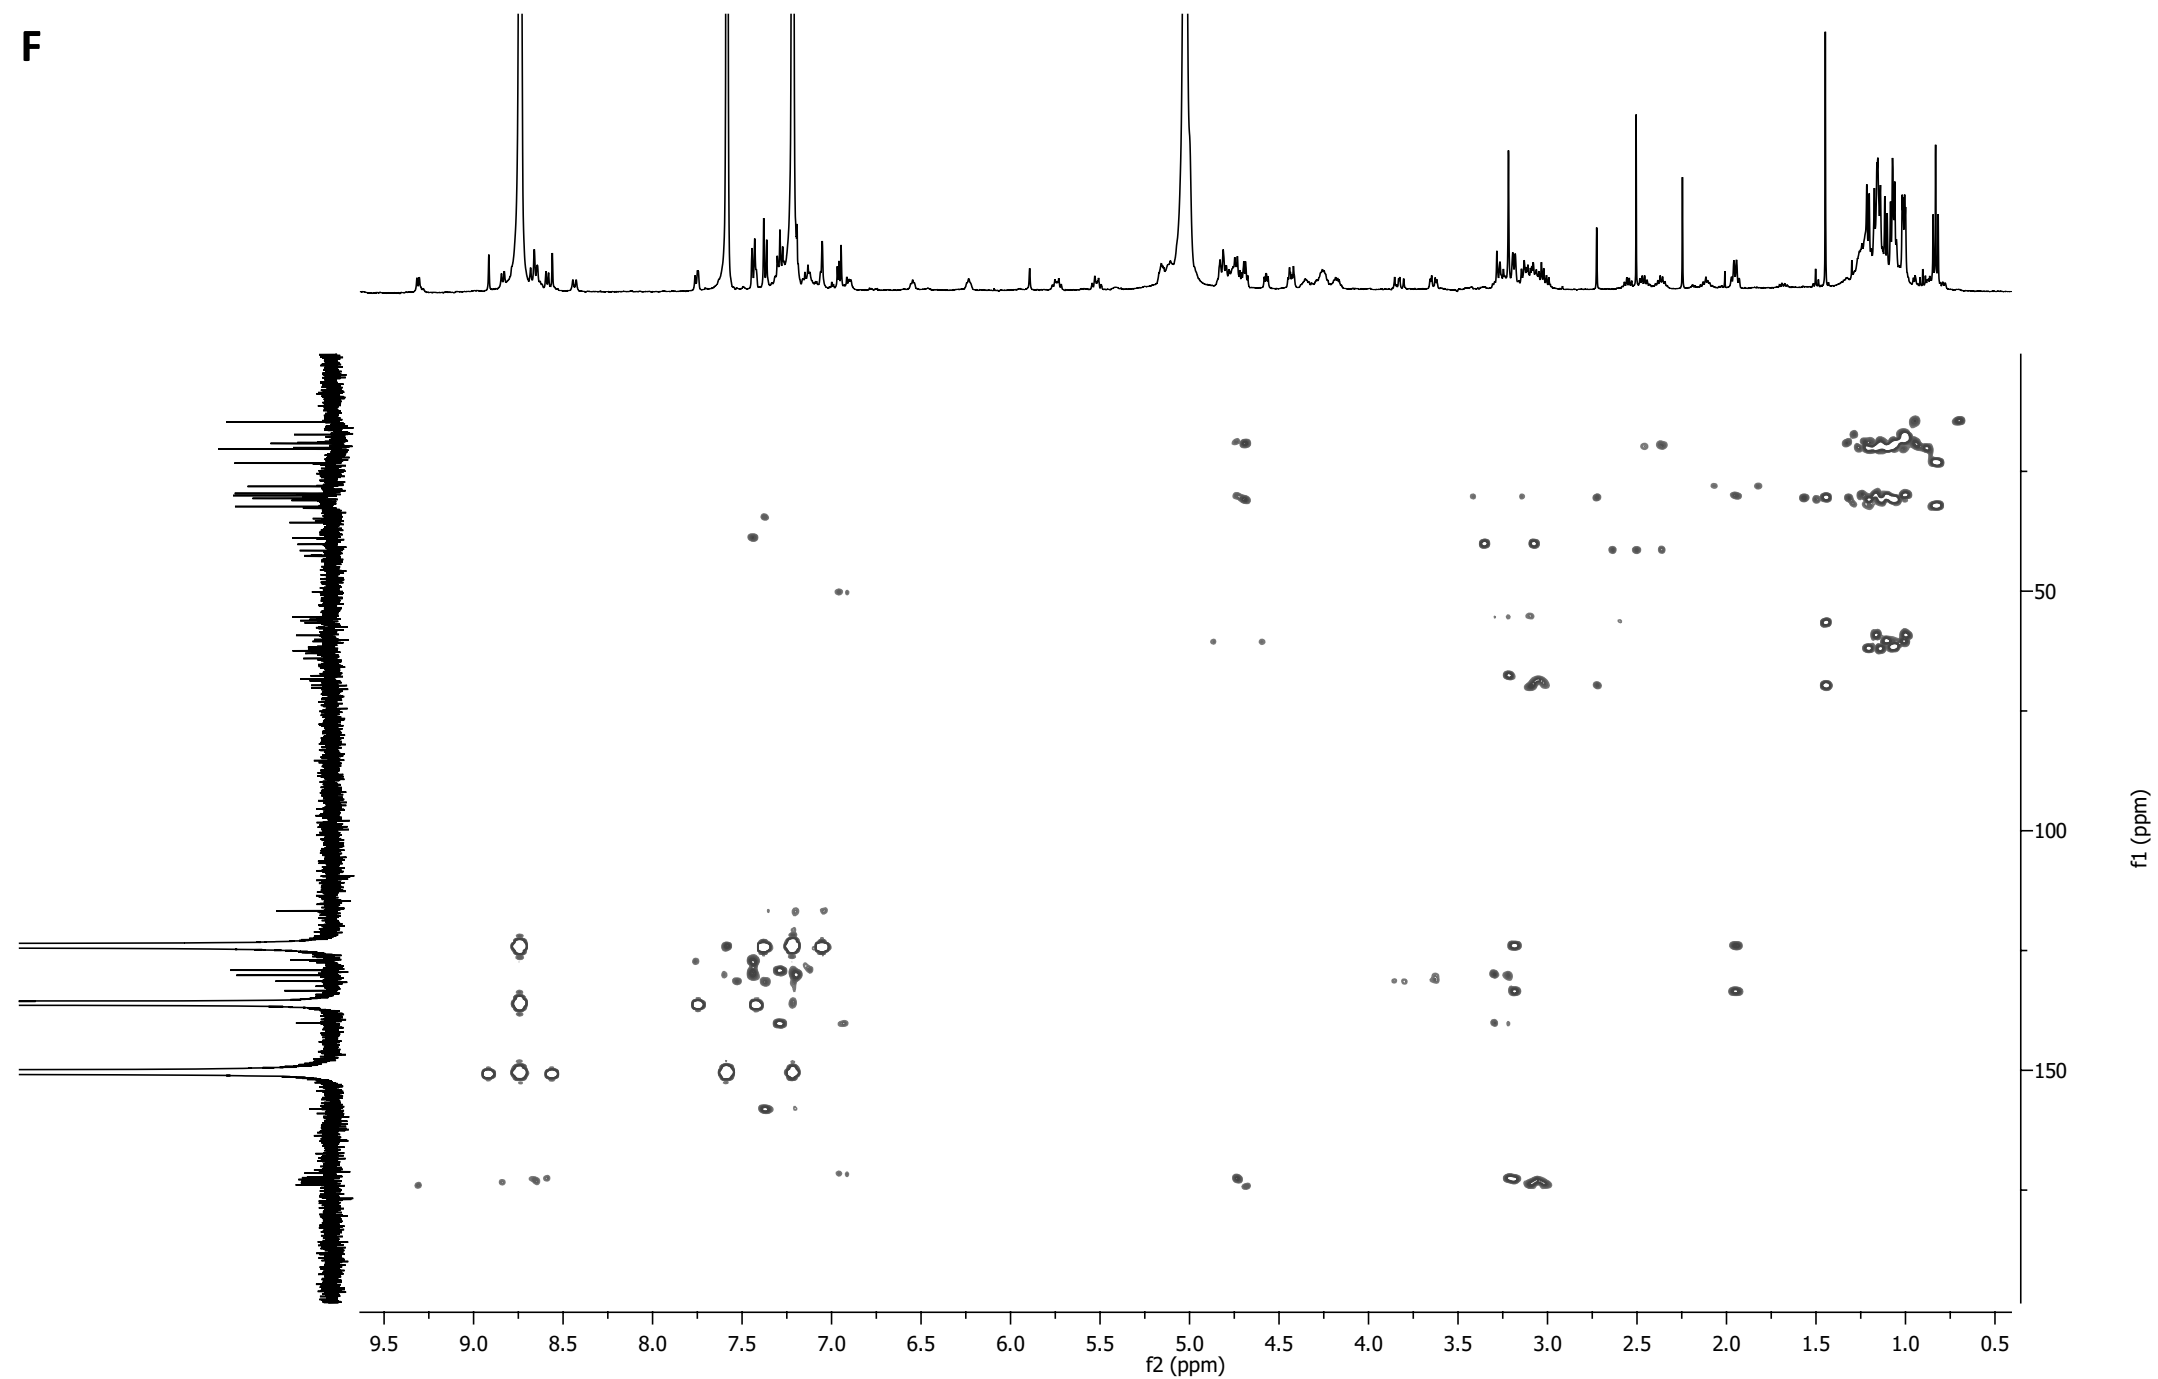

**Figure S15. Characterization of thalassospiramide F (16).** (F) HMQC spectrum in pyridine- $d_5$ .

**G**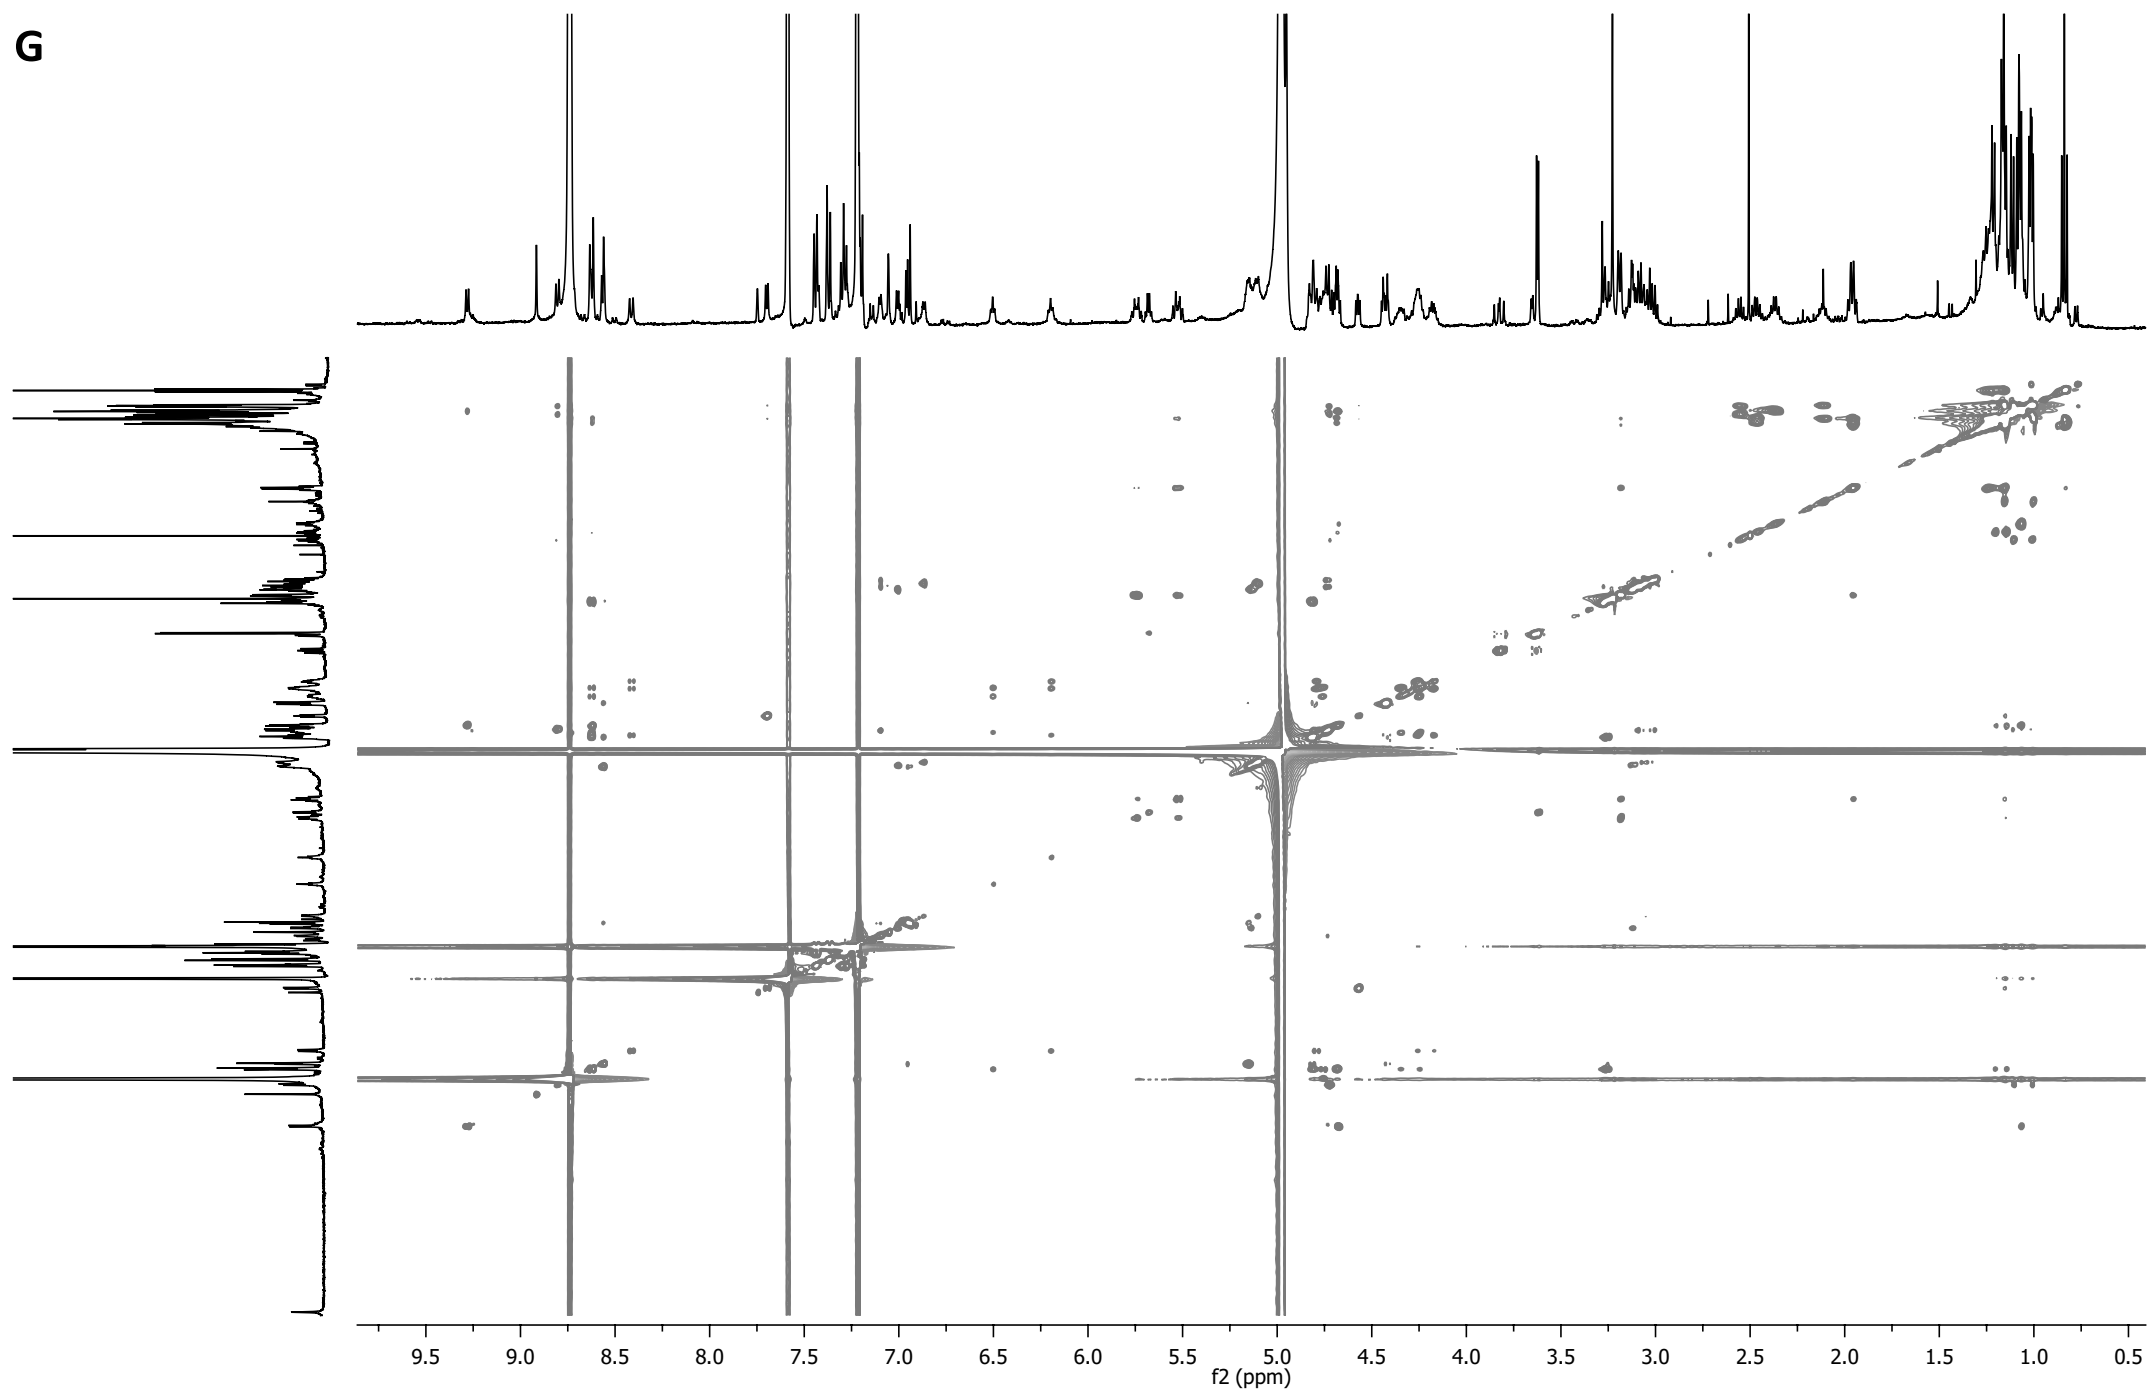

**Figure S15. Characterization of thalassospiramide F (16).** (G)  $^1\text{H}$ - $^1\text{H}$  TOCSY spectrum in pyridine- $d_5$ .

H

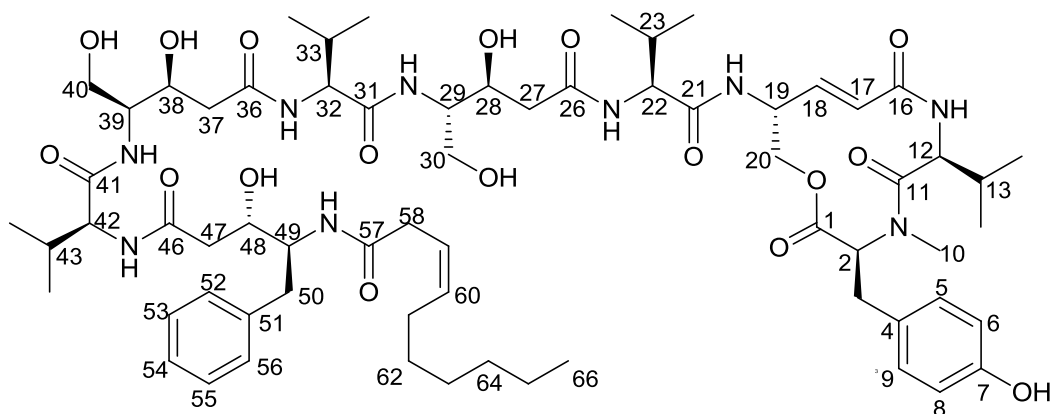NMR Spectral Data (500 MHz ( $^1\text{H}$ ), 125 MHz ( $^{13}\text{C}$ ) in pyridine- $d_5$ ) of thalassospiramide F (**16**)

| C/H   | $\delta_{\text{H}}$ | mult ( $J$ in Hz) | $\delta_{\text{C}}$ |                 | key HMBC |
|-------|---------------------|-------------------|---------------------|-----------------|----------|
| 1     |                     |                   | 170.8               | C               |          |
| 2     | 4.43                | m                 | 67.7                | CH              |          |
| 3a    | 3.64                | dd (14.2, 4.7)    | 34.8                | CH <sub>2</sub> |          |
| 3b    | 3.83                | dd (14.2, 10.9)   |                     |                 |          |
| 4     |                     |                   | 127.0               | C               |          |
| 5     | 7.37                | d (8.6)           | 131.4               | CH              |          |
| 6     | 7.20                | d (8.6)           | 116.8               | CH              |          |
| 7     |                     |                   | 158.1               | C               |          |
| 7-OH  |                     |                   |                     |                 |          |
| 8     | 7.20                | d (8.6)           | 116.8               | CH              |          |
| 9     | 7.37                | d (8.6)           | 131.4               | CH              |          |
| 10    | 3.23                | s                 | 40.2                | CH <sub>3</sub> | 11       |
| 11    |                     |                   | 172.3               | C               |          |
| 12    | 4.55                | dd (6.0, 4.5)     | 59.2                | CH              |          |
| 12-NH | 7.70                | d (6.0)           |                     |                 | 16       |
| 13    | 2.11                | m                 | 30.0                | CH              |          |
| 14    | 1.01                | d (6.5)           | 20.3                | CH <sub>3</sub> |          |
| 15    | 1.16                | d (6.5)           | 17.3                | CH <sub>3</sub> |          |
| 16    |                     |                   | 171.5               | C               |          |
| 17    | 6.94                | d (15.8)          |                     | CH              |          |
| 18    | 6.99                | m                 |                     | CH              |          |
| 19    | 5.15                | m                 | 50.2                | CH              |          |
| 19-NH | 8.57                | d (5.0)           |                     |                 | 21       |
| 20a   | 4.44                | m                 | 64.1                | CH <sub>2</sub> | 1        |
| 20b   | 4.81                | m                 |                     |                 | 1        |
| 21    |                     |                   | 172.4               | C               |          |
| 22    | 4.68                | m                 | 61.7                | CH              |          |
| 22-NH | 9.28                | d (6.5)           |                     |                 | 26       |
| 23    | 2.37                | m                 | 31.1                | CH              |          |
| 24    | 1.06                | d (6.5)           | 20.1                | CH <sub>3</sub> |          |
| 25    | 1.08                | d (6.5)           | 19.2                | CH <sub>3</sub> |          |
| 26    |                     |                   | 173.9               | C               |          |
| 27    | 3.04                |                   | 42.7                | CH <sub>2</sub> |          |
| 28    | 5.10                |                   | 68.3                | CH              |          |
| 29    | 4.82                |                   | 56.1                | CH              |          |
| 29-NH | 8.41                | d (9.5)           |                     |                 |          |

|       |      |                    |       |                 |    |
|-------|------|--------------------|-------|-----------------|----|
| 30a   | 4.18 | m                  | 63.0  | CH <sub>2</sub> |    |
| 30b   | 4.25 | m                  |       |                 |    |
| 30-OH | 6.20 |                    |       |                 |    |
| 31    |      |                    | 173.9 | C               | 29 |
| 32    | 4.68 | m                  | 62.1  | CH              |    |
| 32-NH | 8.63 | m                  |       |                 | 36 |
| 33    | 2.47 | m                  | 30.5  | CH              |    |
| 34    | 1.15 | d (6.4)            | 20.3  | CH <sub>3</sub> |    |
| 35    | 1.21 | d (6.8)            | 19.2  | CH <sub>3</sub> |    |
| 36    |      |                    | 173.2 | C               |    |
| 37    | 3.06 |                    | 42.6  | CH <sub>2</sub> |    |
| 38    | 5.10 |                    | 68.7  | CH              |    |
| 39    | 4.78 |                    | 55.4  | CH              |    |
| 39-NH | 8.63 | m                  |       |                 | 39 |
| 40a   | 4.25 | m                  | 62.5  | CH <sub>2</sub> |    |
| 40b   | 4.35 | m                  |       |                 |    |
| 40-OH | 6.50 |                    |       |                 |    |
| 41    |      |                    | 172.8 | C               |    |
| 42    | 4.73 | m                  | 60.5  | CH              |    |
| 42-NH | 8.81 | d (8.0)            |       |                 |    |
| 43    | 2.55 | m                  | 30.3  | CH              |    |
| 44    | 1.02 |                    | 20.3  | CH <sub>3</sub> |    |
| 45    | 1.12 | d (6.5)            | 19.0  | CH <sub>3</sub> |    |
| 46    |      | d (6.8)            | 173.5 | C               |    |
| 47a   | 3.01 |                    | 42.5  | CH <sub>2</sub> |    |
| 47b   | 3.09 |                    |       |                 |    |
| 48    | 5.11 |                    | 70.2  | CH              |    |
| 49    | 4.80 |                    | 55.4  | CH              |    |
| 49-NH | 8.63 | m                  |       |                 |    |
| 50a   | 3.22 |                    | 38.9  | CH <sub>2</sub> |    |
| 50b   | 3.30 |                    |       |                 |    |
| 51    |      |                    | 140.1 | C               |    |
| 52    | 7.44 |                    | 129.8 | CH              |    |
| 53    | 7.30 |                    | 129.1 | CH              |    |
| 54    | 7.30 |                    | 129.1 | CH              |    |
| 55    | 7.30 |                    | 129.1 | CH              |    |
| 56    | 7.44 |                    | 129.8 | CH              |    |
| 57    |      |                    | 172.9 | C               |    |
| 58    | 3.19 | m                  | 35.7  | CH <sub>2</sub> | 57 |
| 59    | 5.74 | dt(10.5, 7.5, 1.5) | 123.7 | CH              |    |
| 60    | 5.52 | dt(10.5, 7.5, 1.0) | 133.4 | CH              |    |
| 61    | 1.96 | m                  | 28.1  | CH <sub>2</sub> |    |
| 62    | 1.24 | m                  | 30.0  | CH <sub>2</sub> |    |
| 63    | 1.17 | m                  | 29.6  | CH <sub>2</sub> |    |
| 64    | 1.15 | m                  | 32.3  | CH <sub>2</sub> |    |
| 65    | 1.20 | m                  | 23.2  | CH <sub>2</sub> |    |
| 66    | 0.84 | t (7.0)            | 14.7  | CH <sub>3</sub> |    |

**Figure S15. Characterization of thalassospiramide E. (H) NMR assignment.**

Table S1: Stereochemical characterization of amino acid residues of thalassospiramides using advanced Marfey's reagents

i) thalassospiramide A (1)

| Fragment | MW    | L-FDLA | D-FDLA | configuration |
|----------|-------|--------|--------|---------------|
| Valine   | 411.2 | 13.8   | 15.5   | L             |
| Ser      | 399.1 | 11.8   | 12.1   | L             |
| Met-tyr  | 489.2 | 11.4   | 11.6   | L             |
| Ahpa     | 427.2 | 12.5   | 12.3   | R             |

ii) thalassospiramide A1 (3)

| Fragment | MW    | L-FDLA | D-FDLA | configuration |
|----------|-------|--------|--------|---------------|
| Valine   | 411.2 | 13.8   | 15.5   | L             |
| Tyr      | 475.2 | 11.2   | 11.3   | L             |
| Met-tyr  | 489.2 | 11.4   | 11.6   | L             |
| Ahpa     | 427.2 | 12.5   | 12.3   | R             |

iii) thalassospiramide A4 (6)

| Fragment  | MW    | L-FDLA | D-FDLA | configuration |
|-----------|-------|--------|--------|---------------|
| Valine    | 411.2 | 13.8   | 15.5   | L             |
| Met-tyr   | 489.2 | 11.4   | 11.6   | L             |
| Ahpa(19C) | 427.2 | 12.5   | 12.3   | R             |

iv) thalassospiramide A5 (11)

| Fragment  | MW    | L-FDLA | D-FDLA | configuration |
|-----------|-------|--------|--------|---------------|
| Valine    | 411.2 | 13.8   | 15.5   | L             |
| Met-tyr   | 489.2 | 11.4   | 11.6   | L             |
| Phe       | 459.2 | 14.6   | 16.0   | L             |
| Ahpa(19C) | 427.2 | 12.5   | 12.3   | R             |

v) thalassospiramide B (2)

| Fragment  | MW    | L-FDLA | D-FDLA | configuration |
|-----------|-------|--------|--------|---------------|
| Valine    | 411.2 | 13.8   | 15.5   | L             |
| Met-Tyr   | 489.2 | 11.4   | 11.6   | L             |
| Ahpa(19C) | 427.2 | 12.5   | 12.3   | R             |

vi) thalassospiramide C (7)

| Fragment  | MW    | L-FDLA | D-FDLA | configuration |
|-----------|-------|--------|--------|---------------|
| Valine    | 411.2 | 13.8   | 15.5   | L             |
| Tyr       | 475.2 | 11.2   | 11.3   | L             |
| Met-tyr   | 489.2 | 11.4   | 11.6   | L             |
| Ahpa(19C) | 427.2 | 12.5   | 12.3   | R             |

## vii) thalassospiramide D (14)

| Fragment  | MW    | L-FDLA | D-FDLA | configuration |
|-----------|-------|--------|--------|---------------|
| Valine    | 411.2 | 13.8   | 15.5   | L             |
| Met-Tyr   | 489.2 | 11.4   | 11.6   | L             |
| Ahpa(19C) | 427.2 | 12.5   | 12.3   | R             |

## viii) thalassospiramide E (9)

| Fragment  | MW    | L-FDLA | D-FDLA | configuration |
|-----------|-------|--------|--------|---------------|
| Valine    | 411.2 | 13.8   | 15.5   | L             |
| Met-Tyr   | 489.2 | 11.4   | 11.6   | L             |
| Ahpa(19C) | 427.2 | 12.5   | 12.3   | R             |

## ix) thalassospiramide F (16)

| Fragment  | MW    | L-FDLA | D-FDLA | configuration |
|-----------|-------|--------|--------|---------------|
| valine    | 411.2 | 13.8   | 15.5   | L             |
| met-Tyr   | 489.2 | 11.4   | 11.6   | L             |
| Ahpa(19C) | 427.2 | 12.5   | 12.3   | R             |



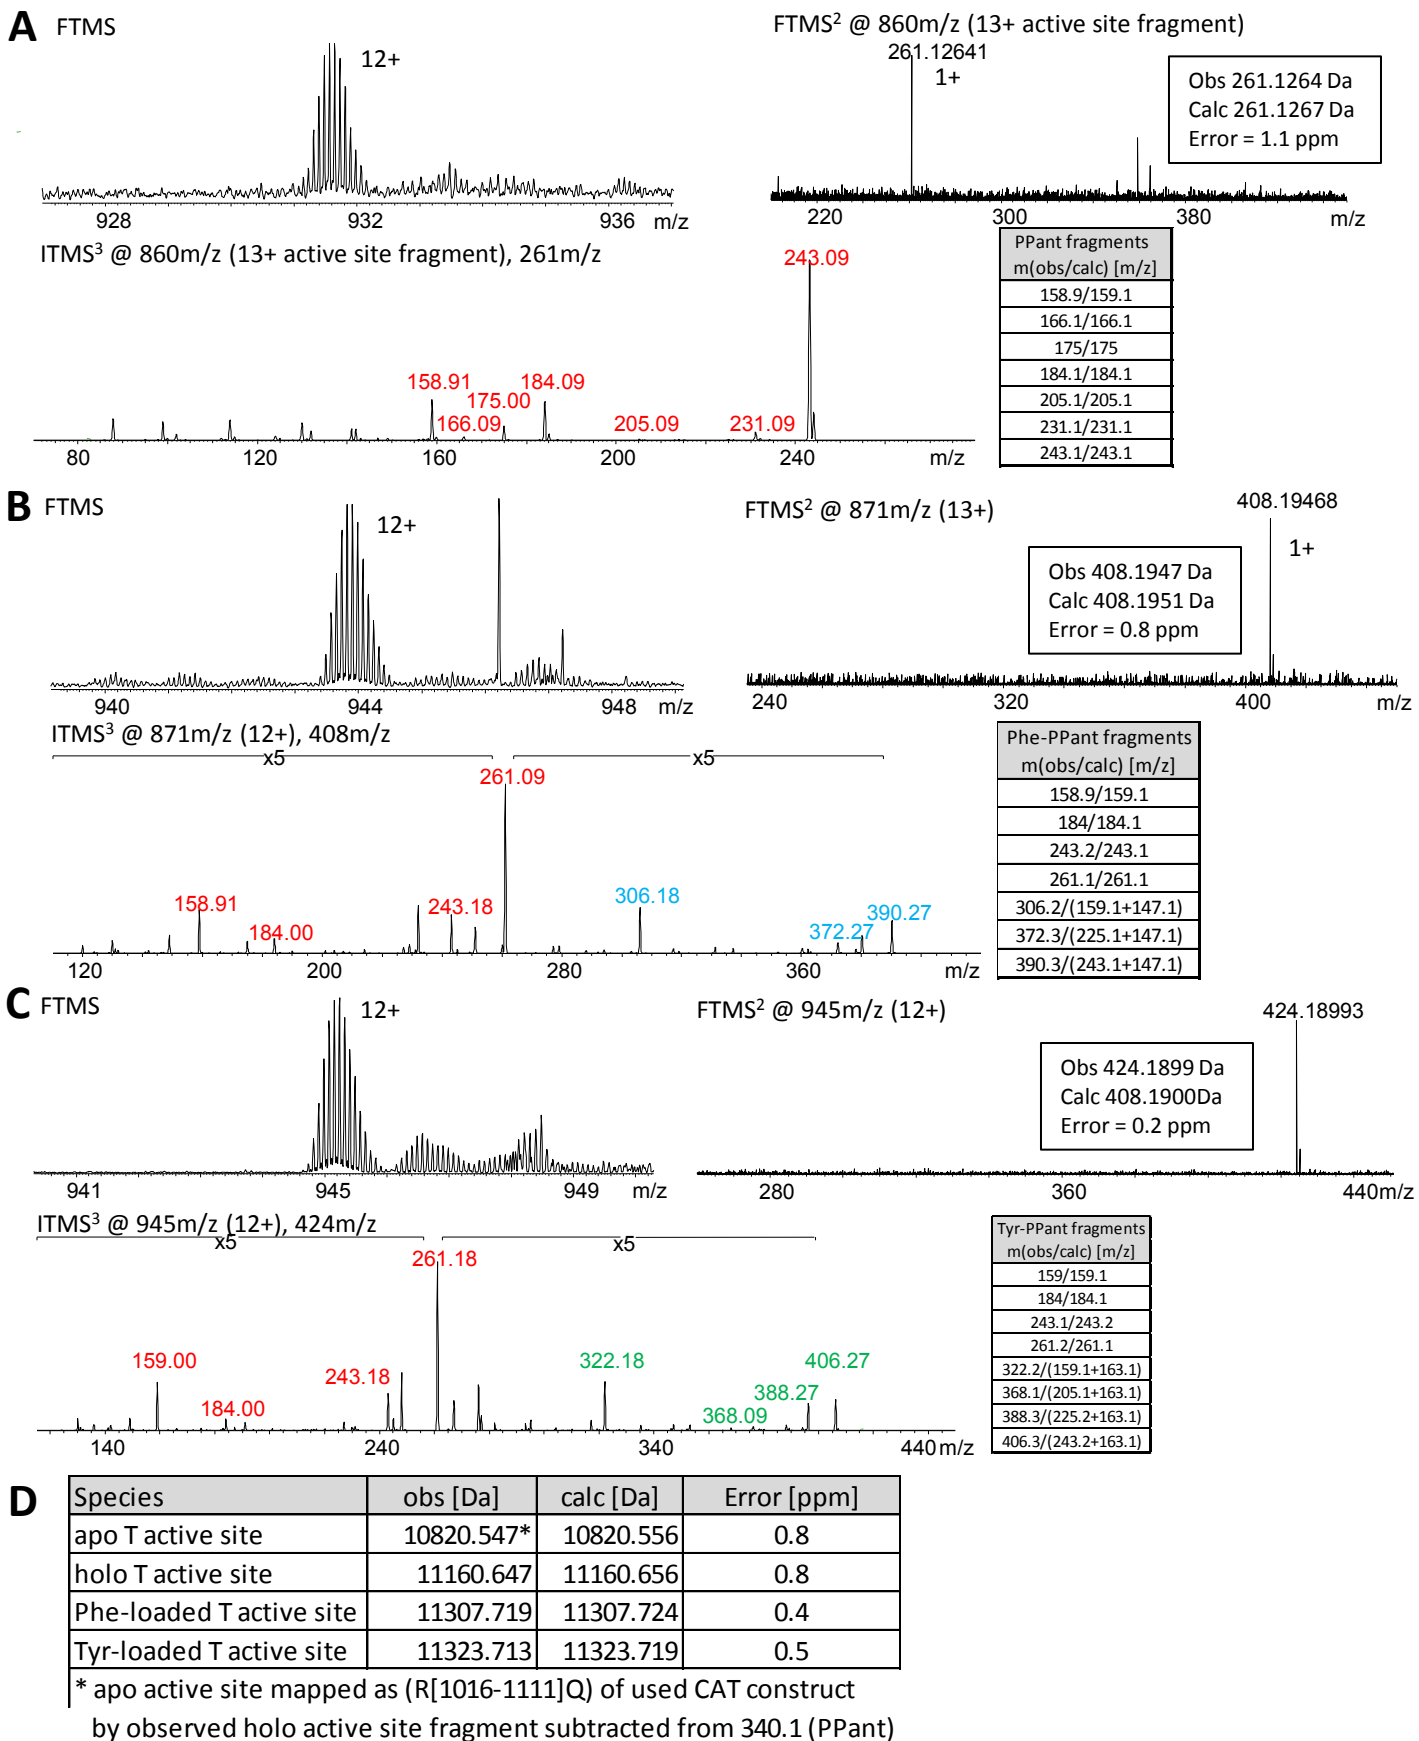

**Figure S16. Active site mapping and substrate identification of the TtcA CAT tridomain of the *Thalassospira sp.* CNJ-328 thalassospiramide pathway by ESI-FTMS, PPant ejection and PPant fragmentation.** Observed Ppant fragments are listed next to the corresponding MS<sup>3</sup> spectra. (A) Characterization of the holo active site fragment of the T domain by ESI-FTMS, PPant ejection (MS<sup>2</sup> of 13+ active site fragment) and PPant fragmentation (MS<sup>3</sup> @ 261 m/z). (B) Characterization of phenylalanine loading on the active site fragment of the T domain by ESI-FTMS, PPant ejection (MS<sup>2</sup> of Phe-loaded active site fragment) and PPant fragmentation (MS<sup>3</sup> @ 408 m/z, Phe-PPant). (C) Characterization of tyrosine loading on the active site fragment of the T domain by ESI-FTMS, PPant ejection (MS<sup>2</sup> of Tyr-loaded active site fragment) and PPant fragmentation (MS<sup>3</sup> @ 424 m/z, Tyr-PPant). (D) Observed active site fragments of the T domain. The mapped active site fragment of the tryptic digest was R[1016-1111]Q.

**A**

Source fragmentation (SF) ITMS

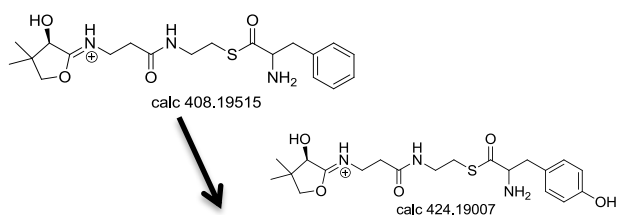

Expected Ser-PPant  
Calc 348.15877

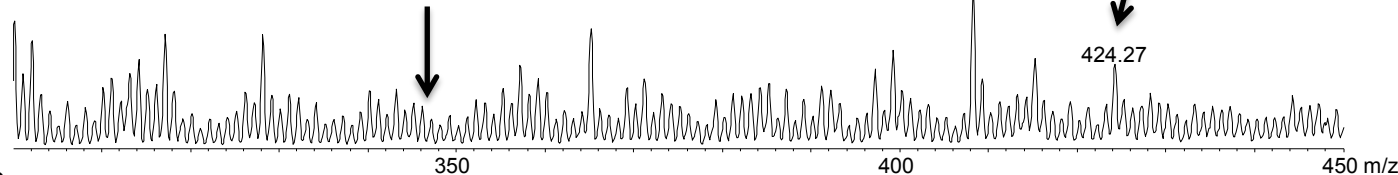**B**

SF, ITMS2 @ 408m/z

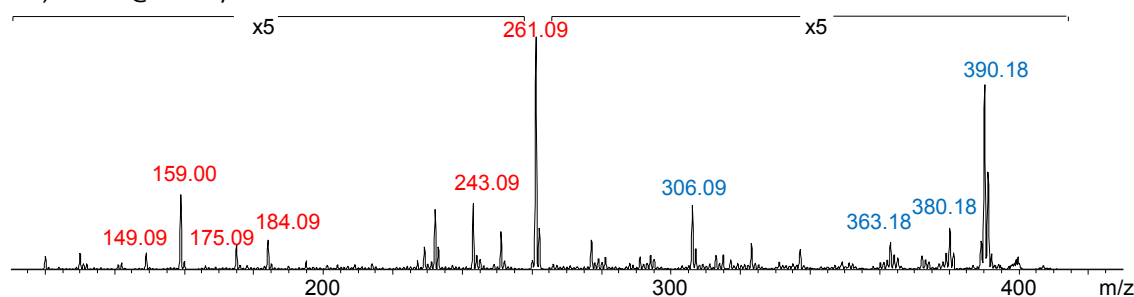

| Phe-PPant fragments<br>m(obs/calc) [m/z] |
|------------------------------------------|
| 149.1/149.1                              |
| 159/159.1                                |
| 175.1/175.1                              |
| 184.1/184.1                              |
| 243.1/243.1                              |
| 261.1/261.1                              |
| 306.1/(159.1+147.1)                      |
| 363.2/(225.1+147.1)                      |
| 390.2/(243.1+147.1)                      |

**C**

SF, ITMS2 @ 424m/z

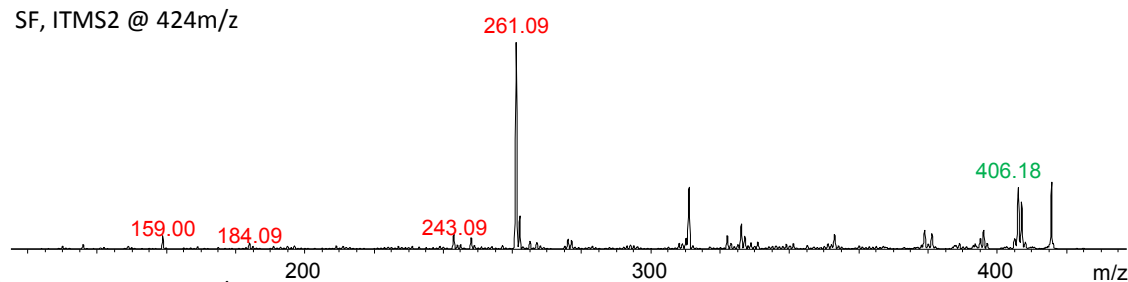

| Tyr-PPant fragments<br>m(obs/calc) [m/z] |
|------------------------------------------|
| 159/159.1                                |
| 184.1/184.1                              |
| 243.1/243.2                              |
| 261.1/261.1                              |
| 406.2/(243.2+163.1)                      |

**D**

SF, ITMS2 @ 348m/z

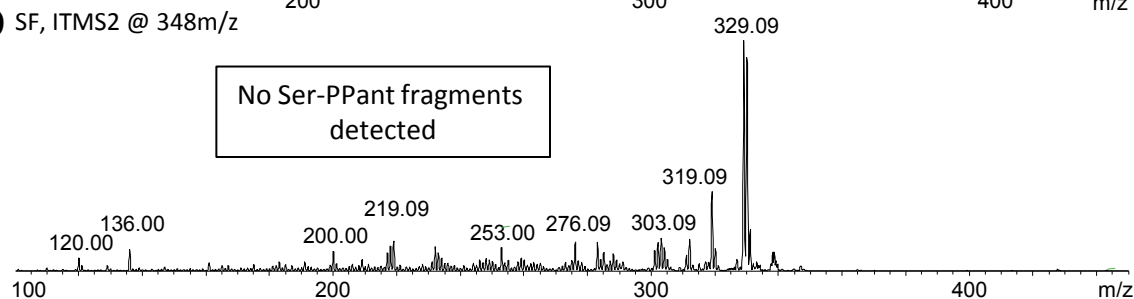

| Calc PPant fragments [Da] | Calc PPant-Ser fragments [Da] |
|---------------------------|-------------------------------|
| 132.1                     | 219.1                         |
| 142.1                     | 142.1                         |
| 149.1                     | 236.1                         |
| 159.1                     | 246.1                         |
| 166.1                     | 166.1                         |
| 175.1                     | 262.1                         |
| 184.1                     | 184.1                         |
| 205.1                     | 292.1                         |
| 215.1                     | 302.1                         |
| 225.1                     | 312.1                         |
| 231.1                     | 318.1                         |
| 243.1                     | 330.1                         |
| 261.1                     | 348.1                         |

**Figure S17. Substrate screening of the TtcA CAT tridomain of the *Thalassospira* sp. CNJ-328 thalassospiramide pathway by source fragmentation-PPant ejection and PPant fragmentation identifies phenylalanine and tyrosine as substrates, but not serine or any other amino acids.** Observed and calculated PPant fragments are listed next to the corresponding MS<sup>2</sup> spectra. (A) Source fragmentation spectrum of active site HPLC fraction of substrate screening reaction in substrate-loaded PPant mass range. Putative Tyr-PPant and Phe-PPant ejected ions, but no Ser-PPant ejected ion could be detected. (B) Phe-PPant fragmentation from source fragmentation spectrum. (C) Tyr-PPant fragmentation from source fragmentation spectrum. (D) Fragmentation of expected Ser-PPant ion yielded no Ser-PPant fragments.

TistMA5 -----TVLLTGWAILLSRLTGRDDITVALPVNTRAAAGF--DGVVMGHAALVPMQVVPADGSGAALLAHIRDRQAGALSHHALSLGRMLAEFQAPAMPE 93  
TistBA5 -----SVLLAAWAVLLARLAGNDVTVIAPVNRGRAGF--DGAVMAMHAALVPMQVVPADGSGAALLAHIRDRQAGALSHHALSLGRMLAEFQAPAMPE 93  
Tha1A5 -----SLMMATFALWLGRIATDDLVSIPVNRQDRGAGF--RNVPGMMVLLPLRMQIADDEFASLLHKVQNHIDALRRHAYFLDRLDLDLSPVPAEP 93  
TistMA2 -----VWTAIATATLNRILEDTQRLSAGIAPAGRSRRDT--TDAIGCFVNLVPUVVEPTAGEALPQLARRIGRIDISQVLTQVQYDYLALDADWQAPAR 93  
TistBA2 -----TAIWAIVATVALTRIIDTTRALFAGFPFAGNRGGT--ADAIGCFVNLVPUVVEPTAGEALPQLARRIGRIDISQVLTQVQYDYLALDADWQAPAR 92  
Tha1A2 -----LWASLTIQVIARHKENGKGT--AIGLFPFAGRRDKET--MQSMGCFVNVLPVAIKPDMADNLDALTRQVGEHVLSDLDVQYDYLALDADWQAPAR 95  
TistMA3 -----TVLTALQALLHRLTGARDIALGLLVAGRGAPVP--DDLGVFLVNTVVLVLRQSDVPGARFADHLAITTRDLAEASADQDAPFEAVLQTLALDRDPA 93  
TistBA3 -----TVMAALLQIILHRMTGQTDIALGLLVGGRAAPVP--QDVVGFVNTVVLVLRQSDVPGARFADHLAITTRDLAEASADQDAPFEAVLQTLALDRDPA 93  
Tha1A3 -----ILTALVQILMRYRQSGQTDIPLGLMVLVAGREQTAL--DDVVGFFVNTVVLVLRQSDVPGARFADHLAITTRDLAEASADQDAPFEAVLQTLALDRDPA 92  
2VSQ HTTSLTALQAVVSVLISRYQQSGDLAFGTVVSGRPAEIKGVEHVMGLFINVVPRRVLKSEGITFNGLLKRLQEQSLQSEPHQVYPLVYDIQSQADQPKLID 350  
IAMU  
TistMA1 -----SLALALFLVLGRVAGTDTVPCVNTPLGNRMGRAE--RRTPGFAYTVPTGTRIDGTESLAGLARRLDAMTRRDLRHMRLAPMRWPEAGFIPDRP-- 92  
TistBA1 -----VMLALFLALLGRSVGTDTPSCTLLSNRLTRAD--RRTLQGFAYTVPTGTRIDGTESLAGLARRLDAMTRRDLRHMRLAPMRWPEAGFIPDRP-- 91  
Tha1A1 -----TAIWMAYFILLGQITHIKHPTVMTPLNLRGAE--RQTPGAFSYIVPFDADLKGKHFSDLRDIFARARRDVRHMLRGAAPMRARLARGLS 94

TistMA5 RSPLEVSISYMNHAATAAGTLD-AGGFRLRGLTRADGKNDLSVF IADKGEGLVLEEDTGLFDDAARIEALGPMLQRILAGLTADPDQ---PVGRPLL 189  
TistBA5 RSPLEVSISYMNHASVAADAVG-AAGFVGRGLARPAKNDLSVFLADHGEAMGLAIEYDTALFDARWIAAFAPMLRLLTALIDAPDR---PIGRPLL 189  
Tha1A5 RTLLSEVLSYMYNAGQGYDQDQAKSMRPIGLGRQCKNDLAI FVRDLPERMVISFDYIADMFDRDRMIELGHIFTKTLQKLVATDASTAPIASLDDL 193  
TistMA2 GPTPVDLVCTLENDLSA-----LEAADISFATGKFPILLI GLMWQGDAAALNIEYDPSRFGSANGRLQTVITRILIAAADPAT---PIDRLDLDL 181  
TistBA2 GPAPFDVVCTLENDLSA-----LDSADLAIATGKFPILLI GLMWQGDAAALNIEYDPSRFGSANGRLQTVITRILIAAADPAT---PIDRLDLDL 183  
Tha1A2 TGQFPDVLVCTLENDLSA-----FMIEDLDFGAGKFPFLMVGMTKKAETSALAVEYQSNIEYGEANIERFAKRFVLFARTLAQNPEN---PLGLVDTPL 180  
TistMA3 RNPLFDVLVCTLENDLSA-----LTVRPLDCVLPFAKFDLSFHQDGRRLRLHLEYATELFTETAVRRLADRLAVLAAPGLBG---SAIGALPML 187  
TistBA3 RNPIFDVLVCTLENDLSA-----LQVVPVTVLPFAKFDLSFHQDREGAARLHVEYATELFDAAVTVQALIDRLAVLAQALPSS---APVAALPLL 186  
Tha1A3 RNPLFDVLVCTLENDLSA-----AELSLKTEFFPSKFDLAFYFSKQNDALLCQIEFDLDFDKSTIQAFNRLEILAAALSTSSS---AKIAELPIL 188  
2VSQ HIIVFENYPLQDAKNEESSENGF--DMVDVHVFEKSNYDLML---MASPGDEMLIKLAYNENVFDEAFILRLKSQLLTALQQLIQNPD---QPVSTINLV 442  
IAMU -----MVNSKSLIHAQNKNGTHEE----- 21  
TistMA1 -----ASRGALFNAMDLPATYG----- 109  
TistBA1 -----IARGATFNAMDLPATYG----- 108  
Tha1A1 GGGAFFNSLDGADPLSFAGLDTR--RVNIYNGVPTDGLIIMQALS PDRQEAELIWIQYDACHDVKSVTRIDRFRHFLSRALDDPEQEIATIAAPPLD 192

TistMA5 DDETRGLLAAREAAEG----- 205  
TistBA5 DDTARAIITGYETRHG----- 205  
Tha1A5 PDEQKANIEIWEQPEPDRDLTDANAGIFAI FARQASITPDAPAIRDTNGTWTFGELHANACIAHCLQTAGIEPGDLVALHIERGRPAIAAILGITAI 293  
TistMA2 AGDR-AVIAANATEFTWPRDGLGRQLDQVLR----ADPDRIVLADARALTRDLRRLRGLGVAALAAVAVGVEPPTVALAVERDPDGLTALMGIWA 275  
TistBA2 DADR-ALIDAVNATTTYPREQGLGQLDAVLT----ADPARPVIADDDQTLDAQTLRRLRGLGVAALAAVAVGVEPPTVALAVERDPDGLTALMGIWA 277  
Tha1A2 EDERDQLSISLNTASDYPDRDGLGELLARQITN---PANAGIALQDRDKHTYSALGQRVAIISTGLDALDVTGPSIVALAADRSLDAITLGLIAMI 277  
TistMA3 TDIDRAALARNWNTARALDTRPLRPLTLR---HA-----GDPSPALIPAGLTLNQGDFRRVGGARLLAAGVRRGDVVALVLPSPDILLIAVHAVLAA 279  
TistBA3 TADDRRHLAARNWNTARALDTRRSPMVRDAVA----AMPDAPALISDDITLNRHFAARVDALAAARLHAAGVAGGDVVALAARLADGADMLIAHAVLRA 281  
Tha1A3 PADERTRFDQFNATDLDAIERSISEPFLDQVR----ATPTAPAVIGTSETLSYEQFAPACRRIAAKRAASVGGPQVIGVAVQSRIDMLAAIHGILLC 283  
2VSQ DRERERFLDGLNPPAQAHETKPLTYWKEAVN----ANPDAPALTYSGQTLVSYRELDEANRIARRLQKHGAGKGSVALYVIMTSGTGTGPKNITTHA 537  
IAMU -----EQYLFVAVNNTKAEYPRDKTIHQLFEEQVS----KRPNNVAIVCENEQTYHELNVKANQLARLFIKGIKDTLVGIMMERSIDLFIGILAVLKA 112  
TistMA1 ----- 112  
TistBA1 ----- 112  
Tha1A1 ELAVIRKLETGPAFTRPVPELLIPDRIQHAISS-----RPGDIALITDDGREVTFATLGHMTNAVAHHLRQNGIAAGDFVGMNVSPSAQQIAAVIGILKC 287

TistMA5 ----- 393  
TistBA5 ----- 393  
Tha1A5 GAGYVPLDPAYPAARNQF ILADSGAKLVLDAGHDALDALGALSESHPSPORINIGGIAPAPTFDKLPELTNADSLPAYIMYTSGSTGTGPKGVLEIQG 393  
TistMA2 GNAFLPLAATFPVATARELLATAGCTVLVADDAERLWAAALAPGITLPLPTG-----RADLPPAPRGPEDPACLLYTSGSTGMPKGVVIVPQR 363  
TistBA2 GGAAYLPLATTFIDTARRLLANAGCTVLLADDAERLWAAALAPGITLPLPTGAMP-----VASAHRDRPDRAPRQGRPEDLACILYTSGSTGMPKGVVIVPQR 373  
Tha1A2 GAAYLPIKDSLPGDAIAALMECEGANVLFCDNTEFDRLSGISGRVRIAYLPDAN-----ATSNASFAKRTGDDLAYVMTSGTGAPKGVLPINR 367  
TistMA3 GAANCPPLGDLPPQRRAMHIEDLGHWPFLCDAAGATAFP-----ADRLILI-----GDDLADAPVVPAGPDALAYVLFVTSGSTGMPKGVVIVPQR 363  
TistBA3 GAANCPPLGDLPPQRRAMHIEDLGHWPFLCDAAGATAFP-----ADRSVWVDA-----DGTAAATPPLPSDPDALAYVLFVTSGSTGMPKGVVIVPQR 369  
Tha1A3 GAAYSPLDHPDHPRRMMDLGLYPRVITADLADLDF-----ANNVLIID-----GSEDADIPDAINAPDDLAYVLFVTSGSTGMPKGVVIVPQR 368  
2VSQ GAAYLVPDPLPDRISYMLADSAAACLLTHQEMKEQAELPYTGTTFLIDQDT-----RFEQEASDPATAIDPNPDYIMYTSGSTGMPKGVVIVPQR 630  
IAMU GGAAYVIDIEYKPERIQYILDDSQARMLLTQKHLVHLIHNQFNGQVEIFEEDT-----IKIREGTLNHPVSKSTDLAYVIYVTSGSTGMPKGVVIVPQR 205  
TistMA1 ----- 205  
TistBA1 ----- 205  
Tha1A1 GAVCVQLDPLQPVARNASMRHLDCRLVLDSDTDANCEIGNTTITVKDINAVPG-----IDGRVLEEDVLADICGDDIAFVPHTSGSTGQPKVPVHHQ 381

TistMA5 ----- 481  
TistBA5 ----- 481  
Tha1A5 AVRRLASGADYAKIVASD-----VVAQAGLAFDASTFEIWAITLLRGEIAVIDRNDLLDPAKFGDALTQFGVTKMFSVGLFNRQVDHDPQ-----T 481  
TistMA2 AILRLAYGD-----FCTPGQ-----CMAQAAPMAFDASILEWAPLNLHGRVRIIPATMFDPLLEIRIDDDGIDTMVVTASLNFQIVDERPG-----T 448  
TistBA2 AIALSLLITGEEVSPGHIARLIDACP-----ITVNLNGYGPTEGNTFTTHIVTSADLDGGP-----VPIGRPVANTRIHVVDRDRPPIGVWGLVLAAGDGL 543  
Tha1A2 FAPLKRLLSGGEALSPHLLQKVMTCACG-----LALINGYGPTEGNTFTTHIPIIPQDVKSAN-----IPIGRPIGNTRTYILDAGGQVPTGVWGLVLAAGDGL 550  
TistMA3 LATLRLVFSAGEALDAATAARFDRLLHARFGTALHNLGYPTEATVDVWQPCFPWDPAAKT-----VPIGRPVANTRVILDRAGRALPGVAGEVLAGPQV 561  
TistBA3 LAGLRLVFSAGEALDAATAARFDRLLHARFGTALHNLGYPTEATVDVWQPCFPWDPAAKT-----VPIGRPVANTRVILDRAGRALPGVAGEVLAGPQV 562  
Tha1A3 LGSLKRRLVFSAGEALDLVKKRFDLLDFRFGTEHLNLGYPTEATVDVWQPCFPWDPAAKT-----VPIGRPIANTTIRILDRDLGDMIGIAGEVLAGPQV 560  
2VSQ MKGLRILCFGGERASVPHVKKALRIMGPCK-----LINCYGPTEGNTFTTHIPIIPQDVKSAN-----LPIGKPIANSVAVILNEQSQLPFGAVGELCISGMGV 813  
IAMU ILSIQTLITAGSATSPSLVNKWEKVT-----YINAYGPTEGNTFTTHIPIIPQDVKSAN-----VPIGPIANTTIRILDRDLGDMIGIAGEVLAGPQV 382  
TistMA1 -----FDGLQVRVADSIFG----- 123  
TistBA1 -----FDGLSVAVRNVAVFG----- 122  
Tha1A1 NFKLRRLMIGGEVLPQTLRRLHSVFES---ADINWCYGPTEATIHATHTLVPREIKTKN---IPLGHVDKGAFFRILDEDRKRVTLVGPGEYLGGLG 570

```

TistMA5 -----DDGWQPTGDRARWRLDLTAIETGGRLDRLTLWQGHLLDPALIEA-QLSGLPGVAALRILPRPGRVAAITAAGRPP 303
TistBA5 -----DDGRAPTGLRARWRADG-EIETSGRLDRVTRWQGHLLDPAIEARLLAALPHLAGLRIAVGDDALRAAVLAAPSTP 303
ThalA5  AREYWQRSDLTGERFIPDP--DQPDQLYRTGDLARWRADG-RIEFGGRHDNQIKLGRFRIELDEIEQQLQSAPGIKNAVALFDVNPDPGGGAIIGCIGITT 675
TistMA2  ATGYAGRPELTAAAFVTLQ--GLDEPLVYRTGDRARWRADG-RIDFGRRDRDQKIRGRQRIETAAVEAILAAAPGVRDAVVAGIGHG--ADQLLAALVAA 638
TistBA2  AIGYVGRPDLTARSFVTLF--DIPEPLLYRTGDRVRLRADG-VLEFGRRDQGLKIRGRQRIETAAIEAALFARPGVRDAMVVVALGAG--ADQTLAALVAA 648
ThalA2  ALGYSGAPERTAKAFVTFD--HLPETRLYKTGDRARWRADG-VIEFGRRDQGVKIRGHRQRIETAAIEKRLSQIDGIRNACVMVSGS--ADAFLLGAAIAA 645
TistMA3  ARGYRGRPDLTADRFRPDP--EITAGARVYHTGLGRWRADG-VVEYLGRIDQVQKIGGVRLPAEVEAALDACPQVVRGLRVVGRRD--GLAELEAWVMGA 657
TistBA3  ARGYRGRPDLTADRFRPDP--EITAGARVYHTGLGRWRADG-AVAYLGRADQVQKIGGVRLPAEVEAALDACPQVVRGLRVVGRRD--GLTELHAYVLGA 660
ThalA3  ACGYRNRPELTAEKFPDDP--RKPQHKLYRTGDLGRFLAGG-SVEYLGRIDHQVQKIRGFRIECPGEVETTESHDLVERALVKAVRVG--DLDELHAFVLGE 656
2VSQ    SKGYVNRADLTKEKFIENP--FKPGETLYRTGDLARWLPDG-TIEYAGRIDQVQKIRGHRQRIETAAIEKRLSQIDGIRNACVMVSGS--ADAFLLGAAIAA 910
1AMU    ARGYWRPELTSQKFDVNP--FVPGKLYRTGDLARWLPDG-TIEYAGRIDQVQKIRGHRQRIETAAIEKRLSQIDGIRNACVMVSGS--ADAFLLGAAIAA 479
TistMA1 -----ELHDVMACLRTYG---AADASDMQWSPFPPARIDRAREVSLAAAFEMLDALADPTQP--VDHLFAGDLPS 189
TistBA1 -----PLDDVLAELRTYG---TAGGADMQWSPFPPARIDRAREVSLAAAFEMLDALADPTQP--VDHLFAGDLPS 183
ThalA1  NRGYINMPAVTAEKFKVDP--TSETDETFYRSGDLASWGEDG-LLYYHGRTEQVQKIRGRQRIEIGEIEYQLSRVPGVGGQAVLVKNN--HGGEIGIYLLPD 667

TistMA5 -----DPAHLRRAAGAILPPVLVPGAWHLLDALPEDDAALAAAGVAATPSLEEA-----EAATERLATVLAUV 366
TistBA5  PLSSTPPLSATLHVAALPPALVPTAWYRLDLPEDRHADLIAAATPLGATAGDRSSP---S-----AAEAEEAAVCAVF 381
ThalA5  Q---DQDIDIPALMTWLTGTHLPGYMIPAKWHIVDTIPIITANGVDRKALLETVRTQSNMADLGGTDT-----PPANFAEEELVCF 754
TistMA2  D---EADAEAGWRAAIAARLPAYMVPFRFRLVDRLPVNVANGADRRAQAAMLAEEAAP-----VARPAG--TGTGFERAVITAF 710
TistBA2  D---TADPQGWQAVADRPLPAYMIPARFERVDRPLVNVANGADRRAQAAMLAGAAGVGETPAAAVVAAAMPLASGLPFRPDGPLEDDFLERAVATAF 743
ThalA2  D---QDNLVVMQILGRNLPDYMIPEFRFVLDLPLVNVNNGIDRKQLDLTKNTAP-----LVPHFTGNANSSSELEQIVANHF 720
TistMA3  A---DLTPAGLRAALADRLPAAMIPTFRWFRIDAVPLSANGVDRKALLETVRTQSNMADLGGTDT-----HPAEAEIARIW 729
TistBA3  D---DLTPQALRAALARHLPDAMIPTFRWFRIDAVPLSANGVDRKALLETVRTQSNMADLGGTDT-----TSPAEAEIARIW 734
ThalA3  G---DLTIGVLRDHLRTRLPEYMIPTFRWFRIDAVPLSANGVDRKALLETVRTQSNMADLGGTDT-----AKPDAETHDLANLERVLRQLW 742
2VSQ    T---QLSAEDVKAKLKKQLPAYMVPQTFTLDELPLTTNGVKNRLLPKPDQDQ--LAEWIGPRNE-----MEETLTIW 981
1AMU    K---HIPLEQLRQFSSEELPTYMIPSYFQLDKMPLTNSNGIDRKQLPEPDLTFGMRVDYEAPRNE-----IEETLVTIW 551
TistMA1  P---ADTAGPVPQPAVPLIDITTRTALAEAEVTRLFAGLLDAPQLTA-----IEETLVTIW 233
TistBA1  D---LAAGPVA-IATAPVIDDAVWRLEDEITRIFAGLLHSALTA-----ASRKPDMRIRHQMAEKIARIW 223
ThalA1  G---SHSKRPDIATVRSALARHLSDAAVPTRELEWVETLPLPSGIDRKALAQFAQAGGKQPVQETPPP-----ASRKPDMRIRHQMAEKIARIW 756

```

Figure S18. Alignment of protein sequences for the areas surrounding the first four adenylation domains in *T. mobilis* (TistMA1-5), *T. bauzanensis* (TistBA1-5) and *T. sp. CNJ-328* (ThalA1-5), to the surfactin termination module (2VSQ) and the *N*-terminal adenylation domain from the Gramicidin S cluster (1AMU), both of which have crystal structures. Sequences span the final 50 amino acid residues of the preceding condensation domain through to the first 15 amino acid residues of the following thiolation domain. Area highlighted in yellow is the *C*-terminal sub-adenylation domain, lysine shown in green is a conserved AMP binding residue, notably missing from the sub domains for the *Tistrella* modules 1 and 5.

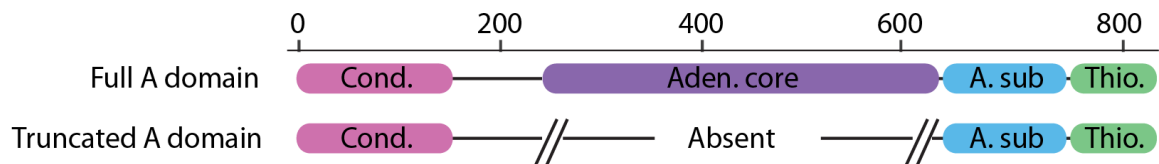

Figure S19. Simplified graphic depicting the biosynthetic domains present in the region between the condensation and thiolation domains based upon the preceding protein alignment. All *Thalassospira* regions analyzed are characterized as full A domains. For the *Tistrella* regions analyzed, portions from module 2 and 3 are characterized as full A domains, while the regions from module 1 and 5 are characterized as truncated A domains in which the 400 amino acid residues of the *N*-terminal core adenylation domain are absent but the 100 amino acid residues of the *C*-terminal sub-adenylation domain are present.
